# Supplementary material
Source: Research Square preprint supplement (doi:10.21203/rs.3.rs-8426416/v1)
Supplement: Supplementary file 1 [file 6dd42bd2ef8c87c343c7668c.docx]

**Supplementary Tables**

## Supplementary Table 1. Details of GFS items

| **Variable** | **Item** | **Response** | **Paper** | **Preprint** |
| --- | --- | --- | --- | --- |
| ***1. Flourishing Index and Domains*** |  |  |  |  |
| 1.1 Flourishing Index | Flourishing domains 1.3, 1.4, 1.5, 1.6, 1.7, and 1.8 |  |  |  |
| 1.2. Secure Flourishing Index | Flourishing domains 1.3, 1.4, 1.5, 1.6, and 1.7 |  |  |  |
| 1.3. Happiness & Life Satisfaction | Items 2.1 and 2.2 |  |  |  |
| 1.4. Social Relationship Quality | Items 2.12 and 8.1 |  |  |  |
| 1.5 Meaning and Purpose | Items 2.10 and 2.11 |  |  |  |
| 1.6 Character & Virtue | Items 7.1 and 7.2 |  |  |  |
| 1.7 Self-Rated Health | Items 4.1 and 4.2 |  |  |  |
| 1.8 Financial and Material Worry | Items 9.1 and 9.2 |  |  |  |
| ***2. Psychological Well-Being*** |  |  |  |  |
| 2.1 Happiness | In general, how happy or unhappy do you usually feel? | 0=Not satisfied with your life at all, 10=Completely satisfied with your life |  | 1 |
| 2.2 Life Satisfaction | Overall, how satisfied are you with life as a whole these days? | 0=Worst possible, 10=Best Possible |  | 1 |
| 2.3 Present Life Evaluation | Please imagine a ladder with steps numbered from zero at the bottom to ten at the top. The top of the ladder represents the best possible life for you, and the bottom of the ladder represents the worst possible life for you. On which step of the ladder would you say you personally feel you stand at this time? | 0=Worst possible, 10=Best Possible |  | 1 |
| 2.4 Future Life Evaluation | Just your best guess, on which step do you think you will stand in the future, say about five years from now? | 0=Worst possible, 10=Best Possible |  |  |
| 2.5 Optimism | Overall, I expect more good things to happen to me than bad | 0=Strongly disagree, 10=Strongly agree | 2,3 |  |
| 2.6 Freedom | I have the freedom in my life to pursue the things that are most important to me | 0=Strongly disagree, 10=Strongly agree |  |  |
| 2.7 Peace | In general, how often do you feel you are at peace with your thoughts and feelings? | Always, often, rarely, never | 4,5 |  |
| 2.8 Balance in Life | In general, how often do you feel the various aspects of your life are in balance? | Always, often, rarely, never | 6,7 |  |
| 2.9 Mastery | How often do you feel very capable in most things you do in life? | Always, often, rarely, never | 8 |  |
| 2.10 Meaning | Overall, to what extent do you feel the things you do in your life areworthwhile? | 0=Not at all worthwhile, 10=Completely worthwhile | 9 |  |
| 2.11 Purpose | I understand my purpose in life | 0=Strongly disagree, 10=Strongly agree | 9 |  |
| 2.12 Self-rated mental health | How would you rate your overall mental health? | 0=Poor, 10=Excellent |  | 10 |
| ***3. Psychological distress*** |  |  |  |  |
| 3.1 Traumatic distress | Think about the biggest threat to life you’ve ever witnessed or experienced first-hand during your life. In the past month, how much have you been bothered by this experience? |  |  |  |
| 3.2 Depression symptoms | Items 3.3 and 3.4 |  |  |  |
| 3.3 Depression – feel hopeless | Over the last 2 weeks, how often have you been bothered by the following problems? Feeling down, depressed or hopeless | Nearly every day, more than half the days, several days, not at all |  |  |
| 3.4 Depression – loss of interest | Over the last 2 weeks, how often have you been bothered by the following problems? Little interest or pleasure in doing things | Nearly every day, more than half the days, several days, not at all |  |  |
| 3.5 Anxiety symptoms composite | Items 3.6 and 3.7 |  |  |  |
| 3.6 Anxiety – feel on edge | Over the last 2 weeks, how often have you been bothered by the following problems? Feeling nervous, anxious or on edge | Nearly every day, more than half the days, several days, not at all |  |  |
| 3.7 Anxiety – can’t stop worrying | Over the last 2 weeks, how often have you been bothered by the following problems? Not being able to stop or control worrying | Nearly every day, more than half the days, several days, not at all |  |  |
| 3.8 Suffering | To what extent are you suffering? This can be any type of physical or mental suffering | A lot, some not very much, not at all | 11 |  |
| ***4. Social Well-Being*** |  |  |  |  |
| 4.1 Content with relationships | I am content with my friendships and relationships | 0=Strongly disagree, 10=Strongly agree |  |  |
| 4.2 Satisfying Relationships | My relationships are as satisfying as I would want them to be | 0=Strongly disagree, 10=Strongly agree |  |  |
| 4.3 Social Support | If you were in trouble, how often could you count on people in your life, like relatives or friends, to help you whenever you need them? | 0=Never, 10=Always | 45,46 |  |
| 4.4 Intimate/close Friend | Is there any one special person you know that you feel very close to? For example, someone you can confide in and share your feelings with. | Yes. no | 45,46 |  |
| 4.5 Government Approval | How much do you approve or disapprove of the job performance of the national government of this country? | Strongly approve, somewhat approve, neither approve nor disapprove, somewhat disapprove, strongly disapprove |  |  |
| 4.6 Say in government | People like me have a say about what the government does | [Agree, disagree, unsure |  | 14 |
| 4.7 Belonging in country | How would you describe your sense of belonging in your country? | 0=Very weak, 10=Very strong |  | 14,15 |
| 4.8 City/place Satisfaction | Are you satisfied or dissatisfied with the city or area where you live or are you unsure? | Satisfied, dissatisfied, unsure |  |  |
| 4.9 Trust within country | How many people in this country trust one another? | All, most, some, not very many, none | 12 |  |
| ***5. Social participation*** |  |  |  |  |
| 5.1 Ever been married | What is your current marital status? | Single/Never been married, married, separated, divorced, widowed, domestic partner |  |  |
| 5.2 Currently divorced | What is your current marital status? | Single/Never been married, married, separated, divorced, widowed, domestic partner |  |  |
| 5.3 Number of Children | How many children under 18 years of age are now living in your household? | Open ended response |  |  |
| 5.4 Community participation | How often do you participate in groups that are not religious, such as book clubs, sports, or political organizations? |  | 13,14 |  |
| 5.5 Religious participation | How often do you attend religious services? | More than once a week, once a week, one to three times a month, a few times a year, never | 13,14 |  |
| ***6. Social distress*** |  |  |  |  |
| 6.1 Loneliness | How often do you feel lonely? | 0=Always, 10=Never |  | 20 |
| 6.2 Discrimination | How often do you feel discriminated against because of any group you are a part of? | Always, often, rarely, never |  |  |
| ***7. Character & Prosocial Behavior*** |  |  |  |  |
| 7.1 Promoting Good | I always act to promote good in all circumstances, even in difficult and challenging situations. | 0=Not true of me at all, 10=Completely true of me | 20 |  |
| 7.2 Delayed Gratification | I am always able to give up some happiness now for greater happiness later | 0=Not true of me at all, 10=Completely true of me |  | 15 |
| 7.3 Hope | Despite challenges, I always remain hopeful about the future | 0=Strongly disagree, 10=Strongly agree |  | 16, 17 |
| 7.4 Gratitude | If I had to list everything that I felt grateful for, it would be a very long list | 0=Strongly disagree, 10=Strongly agree |  | 18 |
| 7.5 Love | How often do you show someone in your life that you love or care for them? | 0=Never, 10=Always |  | 19 |
| 7.6 Forgiveness | How often have you forgiven those who have hurt you? | Always, often, rarely, never | 20,21 |  |
| 7.7 Charitable Giving | In the past month, have you donated money to a charity? | Yes, no | 22,23 |  |
| 7.8 Helping | In the past month, have you volunteered your time to an organization? | Yes, no | 22,23 |  |
| 7.9 Volunteering | In the past month, have you helped a stranger or someone you didn’t know who needed help? | Yes, no | 24 |  |
| ***8. Physical Health & Health Behavior*** |  |  |  |  |
| 8.1 Self-Rated Physical Health | In general, how would you rate your physical health? | 0=Poor, 10=Excellent | 25 |  |
| 8.2 Health Limitations | Do you have any health problems that prevent you from doing any of the things people your age normally can do? | Yes, no | 26 |  |
| 8.3 Pain | How much bodily pain have you had during the past 4 weeks? | A lot, some, not very much, not at all | 27,28 |  |
| 8.4 Smoking | About how many cigarettes do you smoke each day, if any? | Open-ended response | 29 |  |
| 8.5 Drinking | Approximately how many full drinks of any kind of alcoholic beverage did you drink in the past seven days, if any? | Open-ended response | 30 |  |
| 8.6 Exercise | On how many days did you exercise or engage in vigorous physical activities for 30 minutes or more in the past week? | 0=0 days, 7=7 days | 31 |  |
| ***9. Socioeconomic Outcomes*** |  |  |  |  |
| 9.1 Financial Stability | How often do you worry about being able to meet normal monthly living expenses? | 0=Worry all of the time, 10=Do not ever worry | 32 |  |
| 9.2 Material Stability | How often do you worry about safety, food, or housing? | 0=Worry all of the time, 10=Do not ever worry | 32 |  |
| 9.3 Education | What is your highest completed level of education? | Country-specific response options | 33 |  |
| 9.4 Employment | Which of the following best describes your employment status? | Employed for an employer, self-employed, retired, student, homemaker, unemployed and looking for a job, none of these/other |  |  |
| 9.5 Subjective Financial Well-Being | Which one of these phrases comes closest to your own feelings about your household’s income these days? | Living comfortably on present income; Getting by on present income; Finding it difficult on present income; Finding it very difficult on present income | 32 |  |
| 9.6 Housing | Which of the following best describes the home you live in? | Someone in this household owns this home; Someone in this household rents this home; There are both owners and renters living in this home; None of the above |  |  |
| ***10. Religion/Spirituality*** |  |  |  |  |
| 10.1 Religious/spiritual connection | In general, how often do you feel connected to a religion or a form of spirituality? | Always, often, rarely, never |  |  |
| 10.2 Belief in life after death | Do you believe in life after death, or not? | Yes, no, unsure | 34,35 |  |
| 10.3 Transformative religious experience | Have you had a profound religious or spiritual awakening or experience that changed the direction of your life, or not? | Yes, no, unsure |  |  |
| 10.4 Religious reading or listening | How often do you read or listen to sacred texts or other religious literature? | More than once a day, about once a day, sometimes, never | 42 |  |
| 10.5 Prayer/meditation | How often do you pray or meditate? | More than once a day, about once a day, sometimes, never | 36 |  |
| 10.6 Belief in God/gods/spiritual forces | Do you believe in one God, more than one god, an impersonal spiritual force, or none of these? | I believe in one God, I believe in more than one god, I believe in an impersonal spiritual force, none of the above, unsure | 37,38 |  |
| 10.7 Religious centrality | My religious beliefs and practices are what really lie behind my whole approach to life. | Agree, disagree, not relevant, unsure | 39 |  |
| 10.8 Religious/spiritual comfort | I find strength or comfort in my religion or spirituality. | Agree, disagree, not relevant, unsure |  |  |
| 10.9 Feel loved by God | I feel loved or cared for by God, the main god I worship, or the spiritual force that guides my life | Agree, disagree, not relevant, unsure |  | 45 |
| 10.10 Feel punished by God | I feel God, a god, or a spiritual force is punishing me | Agree, disagree, not relevant, unsure |  | 45 |
| 10.11 Experienced religious criticism | People in my religious community are critical of me or my lifestyle | Agree, disagree, not relevant, unsure |  |  |
| 10.12 Faith sharing | I tell other people about my religion or spirituality even when they have different beliefs | Agree, disagree, not relevant, unsure | 40,41 |  |

## Supplementary Table 2. Mean and standard deviation of all GFS outcomes – GFS countries Ranked

|  | Overall flourishing | | | | | | | | | | | | | | | |
| --- | --- | --- | --- | --- | --- | --- | --- | --- | --- | --- | --- | --- | --- | --- | --- | --- |
|  | **Secure Flourishing Index** | | | | **Flourishing Index** | | | | **Happiness &**  **life satisfaction** | | | | **Physical &**  **mental health** | | | |
| Rank | **Country** | **Mean** | **Country** | **St dev** | **Country** | **Mean** | **Country** | **St dev** | **Country** | **Mean** | **Country** | **St dev** | **Country** | **Mean** | **Country** | **St dev** |
| 1 | Indonesia | 8.10 | Poland | 1.30 | Indonesia | 8.47 | Poland | 1.29 | Indonesia | 8.02 | Poland | 1.56 | Nigeria | 8.46 | Israel | 1.65 |
| 2 | Israel | 7.87 | Indonesia | 1.35 | Mexico | 8.19 | Israel | 1.34 | Mexico | 7.82 | China | 1.65 | Indonesia | 8.43 | China | 1.66 |
| 3 | Philippines | 7.71 | Israel | 1.36 | Philippines | 8.11 | Indonesia | 1.34 | Israel | 7.62 | Israel | 1.65 | Kenya | 8.39 | Mexico | 1.66 |
| 4 | Mexico | 7.64 | Germany | 1.37 | Israel | 8.00 | Mexico | 1.35 | Poland | 7.54 | Australia | 1.87 | Tanzania | 8.38 | Poland | 1.68 |
| 5 | Poland | 7.55 | Mexico | 1.37 | Nigeria | 7.83 | Germany | 1.36 | Philippines | 7.41 | Germany | 1.91 | Israel | 8.27 | Indonesia | 1.71 |
| 6 | Nigeria | 7.37 | Nigeria | 1.39 | Argentina | 7.79 | Spain | 1.42 | Argentina | 7.29 | Mexico | 1.93 | Mexico | 8.07 | Philippines | 1.83 |
| 7 | Egypt | 7.32 | Spain | 1.39 | Kenya | 7.77 | Philippines | 1.44 | Brazil | 7.24 | Sweden | 1.95 | Poland | 7.87 | US | 1.83 |
| 8 | Kenya | 7.28 | Philippines | 1.42 | Poland | 7.63 | Nigeria | 1.45 | Hong Kong | 7.10 | US | 1.95 | Philippines | 7.87 | Nigeria | 1.85 |
| 9 | Tanzania | 7.19 | Argentina | 1.46 | Egypt | 7.63 | Egypt | 1.46 | Sweden | 7.06 | Hong Kong | 1.96 | South Africa | 7.85 | Sweden | 1.85 |
| 10 | Argentina | 7.14 | China | 1.46 | Brazil | 7.63 | China | 1.49 | China | 7.02 | Indonesia | 1.99 | Egypt | 7.71 | Argentina | 1.86 |
| 11 | China | 7.13 | Egypt | 1.50 | Tanzania | 7.48 | Argentina | 1.49 | Egypt | 6.93 | Spain | 1.99 | Argentina | 7.57 | Spain | 1.88 |
| 12 | Hong Kong | 7.12 | Sweden | 1.54 | India | 7.43 | Sweden | 1.57 | US | 6.93 | Argentina | 2.09 | China | 7.38 | Australia | 1.88 |
| 13 | US | 7.11 | South Africa | 1.55 | South Africa | 7.41 | South Africa | 1.58 | Germany | 6.92 | UK | 2.10 | Brazil | 7.28 | Hong Kong | 1.93 |
| 14 | Sweden | 7.10 | Australia | 1.61 | Spain | 7.31 | Australia | 1.59 | Spain | 6.85 | Philippines | 2.12 | India | 7.22 | Germany | 1.93 |
| 15 | South Africa | 7.07 | Kenya | 1.61 | US | 7.18 | Kenya | 1.61 | Australia | 6.80 | Japan | 2.15 | Hong Kong | 7.15 | Egypt | 1.97 |
| 16 | Brazil | 7.02 | US | 1.66 | China | 7.17 | US | 1.65 | Nigeria | 6.79 | Brazil | 2.23 | Spain | 7.15 | Japan | 2.01 |
| 17 | Australia | 7.01 | Brazil | 1.67 | Hong Kong | 7.17 | UK | 1.69 | India | 6.74 | Nigeria | 2.36 | US | 7.00 | Kenya | 2.06 |
| 18 | Germany | 7.01 | UK | 1.68 | Germany | 7.11 | Brazil | 1.72 | South Africa | 6.66 | South Africa | 2.38 | Germany | 6.84 | UK | 2.09 |
| 19 | Spain | 6.90 | Hong Kong | 1.75 | Sweden | 7.04 | Hong Kong | 1.75 | Kenya | 6.62 | Egypt | 2.44 | Sweden | 6.80 | Brazil | 2.13 |
| 20 | India | 6.87 | Japan | 1.79 | Australia | 7.02 | Japan | 1.78 | UK | 6.60 | Kenya | 2.67 | Australia | 6.65 | Tanzania | 2.16 |
| 21 | UK | 6.79 | Tanzania | 1.82 | UK | 6.88 | Tanzania | 1.81 | Japan | 6.14 | Turkey | 2.89 | UK | 6.59 | South Africa | 2.23 |
| 22 | Turkey | 6.32 | India | 1.89 | Turkey | 6.59 | Turkey | 1.93 | Tanzania | 5.96 | Tanzania | 2.99 | Turkey | 6.49 | Turkey | 2.50 |
| 23 | Japan | 5.89 | Turkey | 1.96 | Japan | 5.93 | India | 2.02 | Turkey | 5.36 | India | 3.12 | Japan | 6.09 | India | 2.95 |
| Meta-analytic mean and heterogeneity | | | | | | | | | | | | | | | | |
| Estimate | 7.15 | | | | 7.42 | | | | 6.93 | | | | 7.46 | | | |
| 95% CI | (6.96,7.34) | | | | (7.20,7.65) | | | | (6.69,7.17) | | | | (7.17,7.74) | | | |
| Heterogeneity (tau) | 0.47 | | | | 0.56 | | | | 0.59 | | | | 0.7 | | | |
| Mean within country SD | 1.57 | | | | 1.58 | | | | 2.21 | | | | 1.99 | | | |
| ICC | 0.08 | | | | 0.11 | | | | 0.07 | | | | 0.11 | | | |
| Variability index | 0.25 | | | | 0.27 | | | | 0.31 | | | | 0.31 | | | |

|  | Overall flourishing | | | | | | | | | | | | | | | |
| --- | --- | --- | --- | --- | --- | --- | --- | --- | --- | --- | --- | --- | --- | --- | --- | --- |
|  | **Meaning**  **& purpose** | | | | **Character**  **& virtue** | | | | **Close social**  **relationships** | | | | **Financial &**  **material security** | | | |
| Rank | **Country** | **Mean** | **Country** | **St dev** | **Country** | **Mean** | **Country** | **St dev** | **Country** | **Mean** | **Country** | **St dev** | **Country** | **Mean** | **Country** | **St dev** |
| 1 | Indonesia | 8.70 | Indonesia | 1.51 | Indonesia | 8.49 | Australia | 1.50 | Indonesia | 8.68 | Indonesia | 1.65 | Sweden | 7.36 | China | 2.17 |
| 2 | Mexico | 8.43 | Mexico | 1.67 | Philippines | 8.48 | Mexico | 1.52 | Philippines | 8.56 | Poland | 1.74 | Israel | 7.20 | Poland | 2.25 |
| 3 | Israel | 8.26 | Poland | 1.67 | Mexico | 8.44 | Spain | 1.53 | Mexico | 8.20 | Philippines | 1.83 | Poland | 7.15 | Israel | 2.35 |
| 4 | Philippines | 8.23 | Israel | 1.67 | Argentina | 8.37 | Argentina | 1.55 | India | 7.94 | Mexico | 1.89 | Australia | 6.98 | Hong Kong | 2.36 |
| 5 | Egypt | 7.98 | China | 1.69 | Brazil | 8.34 | Sweden | 1.56 | Israel | 7.91 | China | 1.91 | China | 6.95 | Sweden | 2.49 |
| 6 | Argentina | 7.92 | Philippines | 1.83 | Nigeria | 8.27 | Germany | 1.59 | Egypt | 7.89 | Israel | 1.97 | Hong Kong | 6.87 | Japan | 2.67 |
| 7 | Nigeria | 7.89 | Germany | 1.83 | Kenya | 8.10 | US | 1.60 | Kenya | 7.88 | Hong Kong | 2.00 | US | 6.75 | Germany | 2.68 |
| 8 | Kenya | 7.86 | Nigeria | 1.90 | Israel | 7.95 | Poland | 1.61 | Argentina | 7.81 | Spain | 2.04 | Germany | 6.51 | Australia | 2.72 |
| 9 | Brazil | 7.83 | Hong Kong | 1.91 | Tanzania | 7.84 | Israel | 1.63 | Nigeria | 7.72 | Nigeria | 2.15 | UK | 6.34 | UK | 2.76 |
| 10 | Poland | 7.74 | Spain | 1.91 | Spain | 7.80 | Indonesia | 1.66 | Poland | 7.66 | Germany | 2.17 | Indonesia | 6.27 | Nigeria | 2.86 |
| 11 | Tanzania | 7.66 | Argentina | 1.97 | India | 7.78 | UK | 1.68 | Tanzania | 7.55 | Argentina | 2.19 | Tanzania | 5.76 | US | 2.87 |
| 12 | India | 7.48 | Egypt | 1.98 | South Africa | 7.75 | China | 1.73 | Brazil | 7.46 | Japan | 2.21 | Egypt | 5.74 | Philippines | 2.94 |
| 13 | South Africa | 7.39 | South Africa | 2.08 | US | 7.66 | Brazil | 1.74 | Spain | 7.41 | Sweden | 2.22 | Japan | 5.70 | South Africa | 3.00 |
| 14 | Spain | 7.32 | Japan | 2.09 | Egypt | 7.64 | Philippines | 1.75 | South Africa | 7.40 | Australia | 2.30 | Philippines | 5.69 | Spain | 3.02 |
| 15 | Hong Kong | 7.26 | Australia | 2.11 | Australia | 7.56 | Japan | 1.77 | Germany | 7.27 | South Africa | 2.30 | South Africa | 5.38 | Egypt | 3.09 |
| 16 | China | 7.25 | Brazil | 2.11 | Turkey | 7.43 | Hong Kong | 1.80 | Sweden | 7.23 | UK | 2.31 | Nigeria | 5.12 | Indonesia | 3.09 |
| 17 | Germany | 7.19 | Sweden | 2.15 | Poland | 7.36 | Nigeria | 1.83 | US | 7.18 | Egypt | 2.31 | Turkey | 4.97 | Turkey | 3.29 |
| 18 | US | 7.15 | US | 2.18 | Germany | 7.31 | Egypt | 2.00 | China | 7.17 | US | 2.31 | Mexico | 4.86 | Tanzania | 3.29 |
| 19 | Australia | 7.04 | Kenya | 2.20 | UK | 7.28 | South Africa | 2.02 | UK | 7.16 | Kenya | 2.41 | Kenya | 4.85 | Kenya | 3.37 |
| 20 | Sweden | 6.86 | UK | 2.24 | Sweden | 7.27 | Turkey | 2.15 | Hong Kong | 7.12 | Brazil | 2.58 | Spain | 4.84 | Mexico | 3.48 |
| 21 | UK | 6.77 | Tanzania | 2.52 | Hong Kong | 7.21 | Kenya | 2.25 | Australia | 7.05 | Turkey | 2.64 | India | 4.05 | Argentina | 3.48 |
| 22 | Turkey | 6.66 | India | 2.60 | China | 7.00 | Tanzania | 2.43 | Turkey | 6.99 | India | 2.72 | Brazil | 3.97 | Brazil | 3.59 |
| 23 | Japan | 5.83 | Turkey | 2.62 | Japan | 5.64 | India | 2.49 | Japan | 5.96 | Tanzania | 2.76 | Argentina | 3.87 | India | 3.66 |
| Meta-analytic mean and heterogeneity | | | | | | | | | | | | | | | | |
| Estimate | 7.51 | | | | 7.70 | | | | 7.53 | | | | 5.79 | | | |
| 95% CI | (7.24,7.78) | | | | (7.44,7.96) | | | | (7.29,7.76) | | | | (5.34,6.24) | | | |
| Heterogeneity (tau) | 0.65 | | | | 0.64 | | | | 0.57 | | | | 1.09 | | | |
| Mean within country SD | 2.04 | | | | 1.82 | | | | 2.22 | | | | 2.96 | | | |
| ICC | 0.09 | | | | 0.11 | | | | 0.06 | | | | 0.12 | | | |
| Variability index | 0.31 | | | | 0.29 | | | | 0.3 | | | | 0.41 | | | |

|  | Psychological well-being | | | | | | | | | | | | | | | |
| --- | --- | --- | --- | --- | --- | --- | --- | --- | --- | --- | --- | --- | --- | --- | --- | --- |
|  | **Happiness** | | | | **Life satisfaction** | | | | **Current life**  **evaluation** | | | | **Future life**  **evaluation** | | | |
| Rank | **Country** | **Mean** | **Country** | **St dev** | **Country** | **Mean** | **Country** | **St dev** | **Country** | **Mean** | **Country** | **St dev** | **Country** | **Mean** | **Country** | **St dev** |
| 1 | Indonesia | 8.04 | Poland | 1.60 | Indonesia | 7.99 | Poland | 1.73 | Israel | 7.33 | Poland | 1.62 | Brazil | 8.65 | China | 1.71 |
| 2 | Mexico | 7.79 | Israel | 1.65 | Mexico | 7.85 | China | 1.81 | Sweden | 7.20 | China | 1.76 | Indonesia | 8.37 | Sweden | 1.76 |
| 3 | Israel | 7.76 | China | 1.70 | Egypt | 7.69 | Israel | 2.00 | Poland | 7.12 | Sweden | 1.76 | Mexico | 8.28 | Poland | 1.77 |
| 4 | Poland | 7.55 | Australia | 1.82 | Poland | 7.52 | Sweden | 2.07 | Mexico | 7.10 | Australia | 1.77 | Nigeria | 8.25 | Australia | 1.86 |
| 5 | Argentina | 7.36 | Germany | 1.92 | Philippines | 7.50 | Germany | 2.08 | Indonesia | 6.97 | Israel | 1.81 | Israel | 8.08 | Israel | 1.86 |
| 6 | Philippines | 7.33 | US | 1.92 | Israel | 7.47 | Hong Kong | 2.08 | US | 6.94 | Germany | 1.82 | Argentina | 8.01 | Brazil | 1.87 |
| 7 | Brazil | 7.33 | Sweden | 1.96 | Argentina | 7.22 | Australia | 2.11 | Hong Kong | 6.85 | US | 1.85 | US | 7.73 | Spain | 1.90 |
| 8 | Kenya | 7.27 | Hong Kong | 2.00 | Brazil | 7.15 | Mexico | 2.14 | Australia | 6.79 | Spain | 1.93 | Sweden | 7.70 | US | 1.93 |
| 9 | Hong Kong | 7.16 | Spain | 2.00 | Sweden | 7.09 | US | 2.14 | Argentina | 6.75 | UK | 2.01 | Spain | 7.61 | Germany | 1.93 |
| 10 | Nigeria | 7.06 | Mexico | 2.03 | China | 7.05 | Spain | 2.18 | Germany | 6.74 | Hong Kong | 2.02 | South Africa | 7.61 | Hong Kong | 1.97 |
| 11 | Sweden | 7.03 | UK | 2.08 | Hong Kong | 7.03 | Indonesia | 2.29 | Spain | 6.67 | Mexico | 2.12 | Australia | 7.59 | Indonesia | 2.05 |
| 12 | US | 7.01 | Japan | 2.13 | India | 7.00 | UK | 2.31 | Brazil | 6.59 | Japan | 2.14 | Philippines | 7.55 | Mexico | 2.08 |
| 13 | China | 6.99 | Argentina | 2.14 | Germany | 6.93 | Japan | 2.31 | UK | 6.56 | Argentina | 2.19 | Kenya | 7.47 | Nigeria | 2.08 |
| 14 | South Africa | 6.95 | Indonesia | 2.20 | US | 6.86 | Argentina | 2.38 | Philippines | 6.38 | Brazil | 2.28 | Poland | 7.40 | UK | 2.10 |
| 15 | Spain | 6.92 | Brazil | 2.30 | Spain | 6.79 | Philippines | 2.43 | China | 6.34 | Philippines | 2.40 | China | 7.36 | Argentina | 2.15 |
| 16 | Germany | 6.90 | Philippines | 2.33 | Australia | 6.72 | Brazil | 2.48 | South Africa | 6.11 | Indonesia | 2.52 | India | 7.29 | Philippines | 2.24 |
| 17 | Australia | 6.88 | Nigeria | 2.59 | Nigeria | 6.51 | South Africa | 2.81 | Japan | 5.92 | Turkey | 2.56 | Germany | 7.16 | Japan | 2.25 |
| 18 | UK | 6.71 | South Africa | 2.65 | UK | 6.49 | Egypt | 2.83 | Nigeria | 5.73 | Nigeria | 2.79 | UK | 7.13 | South Africa | 2.46 |
| 19 | Tanzania | 6.58 | Turkey | 2.93 | South Africa | 6.36 | Nigeria | 2.86 | India | 5.62 | South Africa | 2.84 | Hong Kong | 7.10 | Egypt | 2.78 |
| 20 | India | 6.48 | Egypt | 2.94 | Japan | 6.06 | Turkey | 3.24 | Kenya | 5.51 | Egypt | 2.87 | Egypt | 7.07 | Kenya | 2.86 |
| 21 | Japan | 6.22 | Kenya | 2.96 | Kenya | 5.97 | India | 3.47 | Turkey | 5.18 | Kenya | 3.28 | Tanzania | 6.64 | Turkey | 2.98 |
| 22 | Egypt | 6.18 | Tanzania | 3.26 | Tanzania | 5.33 | Kenya | 3.51 | Egypt | 5.04 | Tanzania | 3.30 | Turkey | 6.15 | Tanzania | 3.04 |
| 23 | Turkey | 5.54 | India | 3.56 | Turkey | 5.19 | Tanzania | 3.77 | Tanzania | 4.40 | India | 3.58 | Japan | 6.02 | India | 3.07 |
| Meta-analytic mean and heterogeneity | | | | | | | | | | | | | | | | |
| Estimate | 7.00 | | | | 6.86 | | | | 6.34 | | | | 7.49 | | | |
| 95% CI | (6.77,7.23) | | | | (6.57,7.16) | | | | (6.03,6.66) | | | | (7.22,7.75) | | | |
| Heterogeneity (tau) | 0.56 | | | | 0.72 | | | | 0.77 | | | | 0.65 | | | |
| Mean within country SD | 2.35 | | | | 2.54 | | | | 2.38 | | | | 2.25 | | | |
| ICC | 0.05 | | | | 0.07 | | | | 0.1 | | | | 0.08 | | | |
| Variability index | 0.31 | | | | 0.34 | | | | 0.34 | | | | 0.32 | | | |

|  | Psychological well-being | | | | | | | | | | | | | | | |
| --- | --- | --- | --- | --- | --- | --- | --- | --- | --- | --- | --- | --- | --- | --- | --- | --- |
|  | **Optimism** | | | | **Freedom to pursue**  **what’s most important** | | | | **Inner peace** | | | | **Life balance** | | | |
| Rank | **Country** | **Mean** | **Country** | **St dev** | **Country** | **Mean** | **Country** | **St dev** | **Country** | **Mean** | **Country** | **St dev** | **Country** | **Mean** | **Country** | **St dev** |
| 1 | Brazil | 9.22 | Brazil | 1.62 | Indonesia | 8.77 | Indonesia | 1.81 | Hong Kong | 0.89 | Hong Kong | 0.32 | China | 0.85 | China | 0.36 |
| 2 | Indonesia | 9.15 | Mexico | 1.66 | Philippines | 8.59 | Poland | 1.87 | China | 0.88 | China | 0.33 | Israel | 0.83 | Israel | 0.38 |
| 3 | Mexico | 9.06 | Indonesia | 1.69 | Mexico | 8.56 | Israel | 1.89 | Israel | 0.87 | Israel | 0.34 | Hong Kong | 0.80 | Egypt | 0.40 |
| 4 | Kenya | 8.92 | Nigeria | 1.77 | Tanzania | 8.45 | Mexico | 1.96 | Egypt | 0.86 | Egypt | 0.34 | Egypt | 0.80 | Hong Kong | 0.40 |
| 5 | Nigeria | 8.90 | Israel | 1.78 | Kenya | 8.42 | Philippines | 2.00 | Sweden | 0.82 | Sweden | 0.39 | Sweden | 0.80 | Sweden | 0.40 |
| 6 | Argentina | 8.86 | Argentina | 1.82 | Argentina | 8.29 | Hong Kong | 2.06 | South Africa | 0.80 | South Africa | 0.40 | Poland | 0.78 | Poland | 0.41 |
| 7 | Philippines | 8.79 | Poland | 1.83 | Brazil | 8.27 | Germany | 2.12 | Germany | 0.80 | Germany | 0.40 | Germany | 0.77 | Germany | 0.42 |
| 8 | Tanzania | 8.75 | China | 1.94 | Nigeria | 8.16 | Japan | 2.14 | Nigeria | 0.79 | Nigeria | 0.41 | Spain | 0.77 | Spain | 0.42 |
| 9 | Israel | 8.38 | Spain | 1.97 | India | 8.15 | China | 2.19 | US | 0.79 | US | 0.41 | Mexico | 0.76 | Mexico | 0.42 |
| 10 | Spain | 8.25 | Philippines | 2.00 | Israel | 8.00 | Argentina | 2.23 | Poland | 0.78 | Poland | 0.41 | US | 0.74 | US | 0.44 |
| 11 | South Africa | 8.22 | Hong Kong | 2.10 | South Africa | 7.97 | Sweden | 2.24 | Australia | 0.78 | Australia | 0.42 | Nigeria | 0.72 | Argentina | 0.45 |
| 12 | India | 8.14 | Germany | 2.11 | Poland | 7.60 | Nigeria | 2.27 | UK | 0.72 | UK | 0.45 | Japan | 0.72 | Japan | 0.45 |
| 13 | Poland | 7.72 | Kenya | 2.20 | Egypt | 7.56 | Spain | 2.28 | Indonesia | 0.71 | Brazil | 0.45 | Argentina | 0.72 | Nigeria | 0.45 |
| 14 | Egypt | 7.66 | South Africa | 2.22 | Germany | 7.56 | South Africa | 2.39 | Brazil | 0.71 | Indonesia | 0.45 | Australia | 0.71 | Australia | 0.46 |
| 15 | US | 7.65 | Japan | 2.27 | Sweden | 7.49 | Brazil | 2.39 | Mexico | 0.68 | Japan | 0.47 | South Africa | 0.70 | South Africa | 0.46 |
| 16 | Turkey | 7.65 | Australia | 2.27 | Spain | 7.45 | UK | 2.46 | Japan | 0.68 | Mexico | 0.47 | UK | 0.70 | UK | 0.46 |
| 17 | China | 7.63 | US | 2.29 | Hong Kong | 7.29 | Australia | 2.53 | Argentina | 0.67 | Argentina | 0.47 | Indonesia | 0.69 | Indonesia | 0.46 |
| 18 | Germany | 7.50 | Sweden | 2.32 | Turkey | 7.28 | US | 2.53 | Tanzania | 0.61 | Tanzania | 0.49 | Brazil | 0.67 | Brazil | 0.47 |
| 19 | Australia | 7.41 | Tanzania | 2.36 | US | 7.20 | Kenya | 2.57 | Kenya | 0.61 | India | 0.49 | Kenya | 0.54 | Tanzania | 0.50 |
| 20 | Sweden | 7.30 | UK | 2.44 | Australia | 7.11 | Tanzania | 2.58 | India | 0.61 | Kenya | 0.49 | India | 0.51 | Kenya | 0.50 |
| 21 | Hong Kong | 7.23 | Turkey | 2.50 | UK | 7.06 | Egypt | 2.70 | Spain | 0.55 | Spain | 0.50 | Philippines | 0.50 | India | 0.50 |
| 22 | UK | 6.99 | Egypt | 2.57 | China | 6.91 | India | 2.96 | Philippines | 0.50 | Philippines | 0.50 | Turkey | 0.48 | Philippines | 0.50 |
| 23 | Japan | 6.74 | India | 2.90 | Japan | 6.43 | Turkey | 2.97 | Turkey | 0.49 | Turkey | 0.50 | Tanzania | 0.44 | Turkey | 0.50 |
| Meta-analytic mean and heterogeneity | | | | | | | | | | | | | | | | |
| Estimate | 8.09 | | | | 7.76 | | | | 0.72 | | | | 0.70 | | | |
| 95% CI | (7.78,8.40) | | | | (7.51,8.02) | | | | (0.67,0.77) | | | | (0.65,0.74) | | | |
| Heterogeneity (tau) | 0.75 | | | | 0.63 | | | | 0.12 | | | | 0.12 | | | |
| Mean within country SD | 2.14 | | | | 2.33 | | | | 0.43 | | | | 0.45 | | | |
| ICC | 0.11 | | | | 0.07 | | | | 0.07 | | | | 0.07 | | | |
| Variability index | 0.33 | | | | 0.32 | | | | 0.51 | | | | 0.52 | | | |

|  | Psychological well-being | | | | | | | | | | | | | | | |
| --- | --- | --- | --- | --- | --- | --- | --- | --- | --- | --- | --- | --- | --- | --- | --- | --- |
|  | **Sense of mastery** | | | | **Meaningful activities** | | | | **Understanding purpose** | | | | **Self-rated**  **mental health** | | | |
| Rank | **Country** | **Mean** | **Country** | **St dev** | **Country** | **Mean** | **Country** | **St dev** | **Country** | **Mean** | **Country** | **St dev** | **Country** | **Mean** | **Country** | **St dev** |
| 1 | Egypt | 0.90 | Mexico | 0.30 | Indonesia | 8.53 | Poland | 1.76 | Indonesia | 8.88 | Indonesia | 1.67 | Tanzania | 8.99 | Israel | 1.80 |
| 2 | Mexico | 0.90 | Egypt | 0.31 | Mexico | 8.43 | China | 1.77 | Kenya | 8.51 | Israel | 1.82 | Kenya | 8.73 | Poland | 1.81 |
| 3 | China | 0.88 | Argentina | 0.32 | Israel | 8.09 | Mexico | 1.87 | Philippines | 8.45 | Mexico | 1.96 | Nigeria | 8.66 | Mexico | 1.84 |
| 4 | Argentina | 0.88 | China | 0.33 | Philippines | 8.02 | Indonesia | 1.89 | Mexico | 8.44 | Poland | 1.99 | Egypt | 8.61 | China | 1.88 |
| 5 | Israel | 0.87 | Israel | 0.34 | Egypt | 8.01 | Israel | 1.92 | Israel | 8.44 | Philippines | 2.02 | Indonesia | 8.58 | Indonesia | 1.90 |
| 6 | Hong Kong | 0.86 | US | 0.34 | Argentina | 7.92 | Germany | 1.96 | Nigeria | 8.36 | China | 2.05 | Israel | 8.47 | Philippines | 2.02 |
| 7 | Sweden | 0.86 | Spain | 0.35 | Brazil | 7.86 | Hong Kong | 1.98 | South Africa | 8.07 | Nigeria | 2.11 | Mexico | 8.35 | Nigeria | 2.06 |
| 8 | Spain | 0.86 | Hong Kong | 0.35 | Poland | 7.71 | Australia | 2.11 | India | 8.04 | Hong Kong | 2.15 | South Africa | 8.18 | Tanzania | 2.08 |
| 9 | US | 0.86 | Sweden | 0.35 | Nigeria | 7.43 | Spain | 2.17 | Tanzania | 8.02 | Spain | 2.26 | Poland | 8.07 | Egypt | 2.09 |
| 10 | Australia | 0.85 | Australia | 0.35 | China | 7.33 | US | 2.19 | Egypt | 7.96 | Japan | 2.29 | Philippines | 8.05 | Hong Kong | 2.14 |
| 11 | Poland | 0.84 | South Africa | 0.36 | Spain | 7.30 | Sweden | 2.21 | Argentina | 7.92 | Argentina | 2.33 | Argentina | 7.87 | Argentina | 2.16 |
| 12 | Germany | 0.84 | Germany | 0.37 | US | 7.30 | Argentina | 2.22 | Brazil | 7.80 | Germany | 2.34 | China | 7.53 | Spain | 2.18 |
| 13 | South Africa | 0.84 | Poland | 0.37 | Germany | 7.30 | Japan | 2.25 | Poland | 7.77 | South Africa | 2.40 | Spain | 7.46 | Japan | 2.23 |
| 14 | Nigeria | 0.81 | Brazil | 0.39 | Tanzania | 7.30 | Brazil | 2.28 | Spain | 7.34 | Egypt | 2.41 | India | 7.44 | Germany | 2.24 |
| 15 | Brazil | 0.81 | Nigeria | 0.40 | Hong Kong | 7.27 | UK | 2.31 | Hong Kong | 7.24 | Brazil | 2.50 | Brazil | 7.40 | Sweden | 2.25 |
| 16 | UK | 0.80 | UK | 0.40 | Australia | 7.22 | Philippines | 2.33 | Turkey | 7.19 | Kenya | 2.51 | US | 7.19 | US | 2.25 |
| 17 | Indonesia | 0.78 | Indonesia | 0.42 | Kenya | 7.20 | Egypt | 2.40 | China | 7.17 | Australia | 2.53 | Sweden | 7.18 | Kenya | 2.27 |
| 18 | Turkey | 0.74 | Turkey | 0.44 | Sweden | 7.06 | Nigeria | 2.54 | Germany | 7.08 | Sweden | 2.54 | Hong Kong | 7.17 | Australia | 2.27 |
| 19 | India | 0.70 | India | 0.46 | India | 6.93 | South Africa | 2.78 | US | 6.99 | US | 2.59 | Germany | 7.05 | South Africa | 2.46 |
| 20 | Kenya | 0.69 | Kenya | 0.46 | UK | 6.89 | Turkey | 3.06 | Australia | 6.85 | UK | 2.64 | Australia | 6.81 | UK | 2.48 |
| 21 | Tanzania | 0.66 | Tanzania | 0.48 | South Africa | 6.71 | Kenya | 3.10 | Sweden | 6.65 | Tanzania | 2.96 | UK | 6.80 | Brazil | 2.58 |
| 22 | Philippines | 0.63 | Philippines | 0.48 | Turkey | 6.13 | Tanzania | 3.21 | UK | 6.65 | Turkey | 2.97 | Turkey | 6.27 | Turkey | 3.00 |
| 23 | Japan | 0.39 | Japan | 0.49 | Japan | 5.99 | India | 3.41 | Japan | 5.67 | India | 2.99 | Japan | 6.21 | India | 3.28 |
| Meta-analytic mean and heterogeneity | | | | | | | | | | | | | | | | |
| Estimate | 0.79 | | | | 7.39 | | | | 7.63 | | | | 7.70 | | | |
| 95% CI | (0.75,0.84) | | | | (7.13,7.65) | | | | (7.31,7.95) | | | | (7.37,8.03) | | | |
| Heterogeneity (tau) | 0.12 | | | | 0.63 | | | | 0.78 | | | | 0.8 | | | |
| Mean within country SD | 0.39 | | | | 2.38 | | | | 2.37 | | | | 2.26 | | | |
| ICC | 0.08 | | | | 0.07 | | | | 0.1 | | | | 0.11 | | | |
| Variability index | 0.49 | | | | 0.32 | | | | 0.34 | | | | 0.34 | | | |

|  | Psychological distress | | | | | | | | | | | | | | | |
| --- | --- | --- | --- | --- | --- | --- | --- | --- | --- | --- | --- | --- | --- | --- | --- | --- |
|  | **Traumatic distress** | | | | **Depression symptoms**  **composite** | | | | **Depression –**  **feel hopeless** | | | | **Depression –**  **loss of interest** | | | |
| Rank | **Country** | **Mean** | **Country** | **St dev** | **Country** | **Mean** | **Country** | **St dev** | **Country** | **Mean** | **Country** | **St dev** | **Country** | **Mean** | **Country** | **St dev** |
| 1 | Poland | 0.16 | Poland | 0.37 | Poland | 0.14 | Poland | 0.35 | Poland | 0.09 | Poland | 0.29 | Germany | 0.13 | Germany | 0.34 |
| 2 | Indonesia | 0.22 | Indonesia | 0.42 | Germany | 0.15 | Germany | 0.36 | Indonesia | 0.11 | Indonesia | 0.31 | Poland | 0.15 | Poland | 0.36 |
| 3 | China | 0.24 | China | 0.43 | Sweden | 0.18 | Sweden | 0.39 | Germany | 0.13 | Germany | 0.33 | Sweden | 0.16 | Sweden | 0.37 |
| 4 | Sweden | 0.25 | Sweden | 0.43 | Indonesia | 0.19 | Indonesia | 0.40 | Sweden | 0.14 | Sweden | 0.34 | Indonesia | 0.18 | Indonesia | 0.39 |
| 5 | US | 0.27 | US | 0.45 | US | 0.20 | US | 0.40 | China | 0.14 | China | 0.35 | US | 0.18 | US | 0.39 |
| 6 | Germany | 0.29 | Japan | 0.45 | Israel | 0.21 | Israel | 0.41 | Israel | 0.15 | Israel | 0.36 | Israel | 0.20 | Israel | 0.40 |
| 7 | Japan | 0.29 | Germany | 0.46 | Japan | 0.22 | Japan | 0.41 | US | 0.16 | US | 0.37 | Japan | 0.21 | Japan | 0.41 |
| 8 | Australia | 0.30 | Australia | 0.46 | Australia | 0.24 | Australia | 0.43 | Japan | 0.17 | Japan | 0.37 | Australia | 0.22 | Australia | 0.41 |
| 9 | Israel | 0.32 | Israel | 0.47 | Mexico | 0.28 | Mexico | 0.45 | Australia | 0.18 | Australia | 0.38 | Mexico | 0.25 | Mexico | 0.44 |
| 10 | UK | 0.34 | UK | 0.47 | UK | 0.29 | Spain | 0.45 | Mexico | 0.21 | Mexico | 0.40 | Spain | 0.26 | Spain | 0.44 |
| 11 | South Africa | 0.35 | South Africa | 0.48 | Spain | 0.29 | UK | 0.45 | Spain | 0.22 | Spain | 0.42 | UK | 0.27 | UK | 0.44 |
| 12 | Tanzania | 0.36 | Tanzania | 0.48 | China | 0.30 | China | 0.46 | UK | 0.23 | UK | 0.42 | South Africa | 0.28 | South Africa | 0.45 |
| 13 | Spain | 0.37 | Spain | 0.48 | South Africa | 0.32 | South Africa | 0.47 | South Africa | 0.24 | South Africa | 0.43 | Egypt | 0.30 | Egypt | 0.46 |
| 14 | Hong Kong | 0.37 | Hong Kong | 0.48 | Argentina | 0.36 | Argentina | 0.48 | Hong Kong | 0.24 | Hong Kong | 0.43 | China | 0.31 | China | 0.46 |
| 15 | Mexico | 0.38 | Mexico | 0.49 | Egypt | 0.36 | Egypt | 0.48 | Argentina | 0.27 | Egypt | 0.45 | Argentina | 0.32 | Argentina | 0.47 |
| 16 | Argentina | 0.38 | Argentina | 0.49 | Kenya | 0.40 | Kenya | 0.49 | Egypt | 0.27 | Argentina | 0.45 | Kenya | 0.33 | Kenya | 0.47 |
| 17 | Nigeria | 0.39 | Nigeria | 0.49 | Brazil | 0.41 | Brazil | 0.49 | Kenya | 0.28 | Kenya | 0.45 | Turkey | 0.36 | Turkey | 0.48 |
| 18 | Philippines | 0.46 | Philippines | 0.50 | Turkey | 0.42 | Turkey | 0.49 | Brazil | 0.30 | Brazil | 0.46 | Brazil | 0.39 | Brazil | 0.49 |
| 19 | Kenya | 0.47 | Egypt | 0.50 | Tanzania | 0.45 | Nigeria | 0.50 | Nigeria | 0.31 | India | 0.46 | Nigeria | 0.41 | Nigeria | 0.49 |
| 20 | India | 0.48 | Kenya | 0.50 | Hong Kong | 0.45 | Hong Kong | 0.50 | India | 0.31 | Nigeria | 0.46 | Hong Kong | 0.43 | Hong Kong | 0.50 |
| 21 | Brazil | 0.51 | Brazil | 0.50 | Nigeria | 0.45 | Tanzania | 0.50 | Turkey | 0.35 | Turkey | 0.48 | Tanzania | 0.43 | Tanzania | 0.50 |
| 22 | Turkey | 0.52 | India | 0.50 | India | 0.49 | India | 0.50 | Philippines | 0.36 | Philippines | 0.48 | India | 0.47 | India | 0.50 |
| 23 | Egypt | 0.53 | Turkey | 0.50 | Philippines | 0.50 | Philippines | 0.50 | Tanzania | 0.41 | Tanzania | 0.49 | Philippines | 0.49 | Philippines | 0.50 |
| Meta-analytic mean and heterogeneity | | | | | | | | | | | | | | | | |
| Estimate | 0.36 | | | | 0.32 | | | | 0.23 | | | | 0.29 | | | |
| 95% CI | (0.32,0.40) | | | | (0.27,0.36) | | | | (0.19,0.26) | | | | (0.25,0.34) | | | |
| Heterogeneity (tau) | 0.1 | | | | 0.11 | | | | 0.09 | | | | 0.11 | | | |
| Mean within country SD | 0.47 | | | | 0.45 | | | | 0.41 | | | | 0.44 | | | |
| ICC | 0.04 | | | | 0.06 | | | | 0.04 | | | | 0.05 | | | |
| Variability index | 0.5 | | | | 0.51 | | | | 0.46 | | | | 0.5 | | | |

|  | Psychological distress | | | | | | | | | | | | | | | |
| --- | --- | --- | --- | --- | --- | --- | --- | --- | --- | --- | --- | --- | --- | --- | --- | --- |
|  | **Anxiety symptoms**  **composite** | | | | **Anxiety –**  **feel on edge** | | | | **Anxiety –**  **cannot stop worrying** | | | | **Suffering** | | | |
| Rank | **Country** | **Mean** | **Country** | **St dev** | **Country** | **Mean** | **Country** | **St dev** | **Country** | **Mean** | **Country** | **St dev** | **Country** | **Mean** | **Country** | **St dev** |
| 1 | Poland | 0.13 | Poland | 0.33 | Poland | 0.12 | Poland | 0.32 | Poland | 0.09 | Poland | 0.29 | Poland | 0.24 | Poland | 0.43 |
| 2 | Indonesia | 0.14 | Indonesia | 0.35 | Israel | 0.12 | Israel | 0.33 | Indonesia | 0.11 | Indonesia | 0.31 | Indonesia | 0.26 | Indonesia | 0.44 |
| 3 | Sweden | 0.16 | Sweden | 0.36 | Indonesia | 0.13 | Indonesia | 0.34 | Sweden | 0.12 | Sweden | 0.32 | Israel | 0.27 | Israel | 0.45 |
| 4 | Israel | 0.16 | Israel | 0.37 | Germany | 0.14 | Germany | 0.35 | Japan | 0.13 | Japan | 0.34 | South Africa | 0.30 | South Africa | 0.46 |
| 5 | China | 0.18 | China | 0.39 | Sweden | 0.15 | Sweden | 0.35 | Israel | 0.14 | Israel | 0.35 | Sweden | 0.34 | China | 0.47 |
| 6 | Germany | 0.19 | Japan | 0.39 | China | 0.15 | China | 0.36 | China | 0.15 | China | 0.35 | China | 0.34 | Sweden | 0.48 |
| 7 | Japan | 0.19 | Germany | 0.39 | Japan | 0.19 | Japan | 0.39 | Germany | 0.16 | Germany | 0.37 | Japan | 0.37 | Japan | 0.48 |
| 8 | Australia | 0.23 | Australia | 0.42 | Australia | 0.21 | Australia | 0.40 | Australia | 0.18 | Australia | 0.39 | Mexico | 0.39 | Mexico | 0.49 |
| 9 | US | 0.24 | US | 0.43 | US | 0.22 | South Africa | 0.41 | US | 0.19 | US | 0.40 | Nigeria | 0.41 | Turkey | 0.49 |
| 10 | Mexico | 0.29 | Hong Kong | 0.45 | South Africa | 0.22 | US | 0.42 | Hong Kong | 0.23 | Hong Kong | 0.42 | US | 0.43 | Philippines | 0.49 |
| 11 | UK | 0.29 | UK | 0.45 | Mexico | 0.23 | Mexico | 0.42 | Spain | 0.24 | Spain | 0.43 | Argentina | 0.44 | Nigeria | 0.49 |
| 12 | South Africa | 0.29 | Mexico | 0.46 | UK | 0.25 | Hong Kong | 0.43 | Mexico | 0.25 | Mexico | 0.43 | Kenya | 0.46 | US | 0.50 |
| 13 | Hong Kong | 0.29 | South Africa | 0.46 | Hong Kong | 0.25 | UK | 0.43 | UK | 0.25 | UK | 0.43 | Hong Kong | 0.48 | Argentina | 0.50 |
| 14 | Spain | 0.32 | Spain | 0.47 | Kenya | 0.27 | Kenya | 0.45 | South Africa | 0.27 | South Africa | 0.44 | Spain | 0.48 | Brazil | 0.50 |
| 15 | Tanzania | 0.32 | Tanzania | 0.47 | Spain | 0.28 | Spain | 0.45 | Kenya | 0.29 | Kenya | 0.45 | Germany | 0.49 | Tanzania | 0.50 |
| 16 | Kenya | 0.36 | India | 0.48 | Nigeria | 0.30 | Nigeria | 0.46 | Nigeria | 0.31 | Nigeria | 0.46 | Australia | 0.50 | Kenya | 0.50 |
| 17 | India | 0.36 | Kenya | 0.48 | Tanzania | 0.31 | Tanzania | 0.46 | Turkey | 0.31 | Turkey | 0.46 | Egypt | 0.50 | Australia | 0.50 |
| 18 | Nigeria | 0.37 | Nigeria | 0.48 | India | 0.31 | India | 0.46 | Egypt | 0.31 | Egypt | 0.46 | UK | 0.51 | Egypt | 0.50 |
| 19 | Argentina | 0.41 | Argentina | 0.49 | Argentina | 0.35 | Argentina | 0.48 | Tanzania | 0.32 | India | 0.47 | India | 0.51 | Germany | 0.50 |
| 20 | Turkey | 0.42 | Turkey | 0.49 | Philippines | 0.35 | Philippines | 0.48 | India | 0.32 | Tanzania | 0.47 | Tanzania | 0.54 | Hong Kong | 0.50 |
| 21 | Egypt | 0.44 | Egypt | 0.50 | Turkey | 0.40 | Egypt | 0.49 | Argentina | 0.32 | Argentina | 0.47 | Brazil | 0.56 | India | 0.50 |
| 22 | Brazil | 0.46 | Brazil | 0.50 | Egypt | 0.40 | Turkey | 0.49 | Brazil | 0.39 | Brazil | 0.49 | Philippines | 0.59 | Spain | 0.50 |
| 23 | Philippines | 0.48 | Philippines | 0.50 | Brazil | 0.40 | Brazil | 0.49 | Philippines | 0.47 | Philippines | 0.50 | Turkey | 0.60 | UK | 0.50 |
| Meta-analytic mean and heterogeneity | | | | | | | | | | | | | | | | |
| Estimate | 0.29 | | | | 0.25 | | | | 0.24 | | | | 0.44 | | | |
| 95% CI | (0.25,0.34) | | | | (0.21,0.29) | | | | (0.20,0.28) | | | | (0.39,0.48) | | | |
| Heterogeneity (tau) | 0.11 | | | | 0.09 | | | | 0.1 | | | | 0.1 | | | |
| Mean within country SD | 0.44 | | | | 0.42 | | | | 0.42 | | | | 0.49 | | | |
| ICC | 0.06 | | | | 0.05 | | | | 0.05 | | | | 0.04 | | | |
| Variability index | 0.5 | | | | 0.47 | | | | 0.48 | | | | 0.51 | | | |

|  | Social well-being | | | | | | | | | | | | | | | |
| --- | --- | --- | --- | --- | --- | --- | --- | --- | --- | --- | --- | --- | --- | --- | --- | --- |
|  | **Relationship**  **contentment** | | | | **Relationship**  **satisfaction** | | | | **Social support** | | | | **Intimate/close friend** | | | |
| Rank | **Country** | **Mean** | **Country** | **St dev** | **Country** | **Mean** | **Country** | **St dev** | **Country** | **Mean** | **Country** | **St dev** | **Country** | **Mean** | **Country** | **St dev** |
| 1 | Indonesia | 8.59 | Indonesia | 1.80 | Indonesia | 8.59 | Poland | 1.88 | Israel | 8.55 | Poland | 1.85 | Nigeria | 0.93 | Nigeria | 0.26 |
| 2 | Philippines | 8.46 | Poland | 1.83 | Philippines | 8.46 | Indonesia | 1.90 | Mexico | 8.27 | Israel | 2.06 | Philippines | 0.90 | Philippines | 0.30 |
| 3 | Mexico | 8.00 | Israel | 1.94 | Mexico | 8.00 | China | 2.03 | Argentina | 8.20 | Sweden | 2.12 | China | 0.90 | China | 0.30 |
| 4 | India | 7.92 | China | 1.94 | India | 7.92 | Philippines | 2.03 | Sweden | 8.16 | Germany | 2.14 | Israel | 0.88 | Israel | 0.32 |
| 5 | Egypt | 7.84 | Mexico | 2.01 | Egypt | 7.84 | Hong Kong | 2.14 | Philippines | 8.12 | China | 2.16 | Egypt | 0.88 | Egypt | 0.33 |
| 6 | Israel | 7.73 | Philippines | 2.01 | Israel | 7.73 | Mexico | 2.14 | Australia | 8.12 | Spain | 2.23 | Sweden | 0.87 | Spain | 0.34 |
| 7 | Kenya | 7.67 | Hong Kong | 2.05 | Kenya | 7.67 | Israel | 2.16 | Germany | 8.09 | Australia | 2.28 | Spain | 0.87 | Poland | 0.34 |
| 8 | Nigeria | 7.61 | Spain | 2.06 | Nigeria | 7.61 | Japan | 2.27 | Spain | 8.08 | Philippines | 2.31 | US | 0.87 | Sweden | 0.34 |
| 9 | Argentina | 7.57 | Sweden | 2.19 | Argentina | 7.57 | Spain | 2.34 | US | 8.02 | Mexico | 2.36 | Poland | 0.87 | US | 0.34 |
| 10 | Poland | 7.56 | Germany | 2.20 | Poland | 7.56 | Germany | 2.37 | Poland | 8.00 | Japan | 2.37 | Australia | 0.85 | Germany | 0.35 |
| 11 | Tanzania | 7.35 | Australia | 2.29 | Tanzania | 7.35 | Sweden | 2.43 | UK | 7.73 | US | 2.44 | Germany | 0.85 | Australia | 0.35 |
| 12 | Brazil | 7.21 | Japan | 2.29 | Brazil | 7.21 | Argentina | 2.45 | Indonesia | 7.47 | UK | 2.47 | Hong Kong | 0.84 | Hong Kong | 0.37 |
| 13 | South Africa | 7.18 | US | 2.33 | South Africa | 7.18 | Nigeria | 2.45 | Tanzania | 7.38 | Argentina | 2.54 | UK | 0.83 | South Africa | 0.37 |
| 14 | Spain | 7.10 | UK | 2.33 | Spain | 7.10 | US | 2.47 | Brazil | 7.21 | Hong Kong | 2.58 | South Africa | 0.83 | UK | 0.38 |
| 15 | Germany | 7.09 | Argentina | 2.37 | Germany | 7.09 | Australia | 2.48 | South Africa | 7.19 | South Africa | 2.82 | Brazil | 0.82 | Brazil | 0.38 |
| 16 | China | 7.09 | Nigeria | 2.38 | China | 7.09 | UK | 2.49 | Kenya | 6.96 | Indonesia | 2.85 | Kenya | 0.82 | India | 0.39 |
| 17 | Hong Kong | 7.08 | South Africa | 2.51 | Hong Kong | 7.08 | Egypt | 2.60 | Egypt | 6.93 | Nigeria | 2.92 | India | 0.82 | Kenya | 0.39 |
| 18 | Sweden | 7.01 | Brazil | 2.66 | Sweden | 7.01 | South Africa | 2.70 | Nigeria | 6.64 | Brazil | 2.97 | Argentina | 0.81 | Argentina | 0.39 |
| 19 | UK | 6.99 | Egypt | 2.69 | UK | 6.99 | Brazil | 2.85 | China | 6.63 | Tanzania | 3.29 | Mexico | 0.79 | Mexico | 0.41 |
| 20 | US | 6.97 | Kenya | 2.70 | US | 6.97 | Turkey | 2.90 | India | 6.46 | Kenya | 3.37 | Turkey | 0.78 | Turkey | 0.42 |
| 21 | Australia | 6.84 | Turkey | 2.90 | Australia | 6.84 | Kenya | 2.95 | Hong Kong | 6.39 | Turkey | 3.49 | Indonesia | 0.77 | Indonesia | 0.42 |
| 22 | Turkey | 6.71 | Tanzania | 3.05 | Turkey | 6.71 | India | 3.08 | Turkey | 5.47 | Egypt | 3.61 | Tanzania | 0.75 | Tanzania | 0.43 |
| 23 | Japan | 5.94 | India | 3.13 | Japan | 5.94 | Tanzania | 3.29 | Japan | 5.29 | India | 3.88 | Japan | 0.67 | Japan | 0.47 |
| Meta-analytic mean and heterogeneity | | | | | | | | | | | | | | | | |
| Estimate | 7.69 | | | | 7.37 | | | | 7.36 | | | | 0.83 | | | |
| 95% CI | (7.45,7.92) | | | | (7.13,7.61) | | | | (7.00,7.73) | | | | (0.81,0.86) | | | |
| Heterogeneity (tau) | 0.57 | | | | 0.58 | | | | 0.9 | | | | 0.06 | | | |
| Mean within country SD | 2.36 | | | | 2.48 | | | | 2.71 | | | | 0.37 | | | |
| ICC | 0.06 | | | | 0.05 | | | | 0.1 | | | | 0.02 | | | |
| Variability index | 0.31 | | | | 0.32 | | | | 0.38 | | | | 0.38 | | | |

|  | Social well-being | | | | | | | | | | | | | | | |
| --- | --- | --- | --- | --- | --- | --- | --- | --- | --- | --- | --- | --- | --- | --- | --- | --- |
|  | **Government approval** | | | | **Say in government** | | | | **Belonging in country** | | | | **City/place satisfaction** | | | |
| Rank | **Country** | **Mean** | **Country** | **St dev** | **Country** | **Mean** | **Country** | **St dev** | **Country** | **Mean** | **Country** | **St dev** | **Country** | **Mean** | **Country** | **St dev** |
| 1 | Tanzania | 0.88 | Tanzania | 0.32 | Indonesia | 0.80 | Spain | 0.35 | Egypt | 8.86 | Indonesia | 1.80 | India | 0.93 | India | 0.26 |
| 2 | India | 0.84 | India | 0.36 | India | 0.78 | Indonesia | 0.40 | Indonesia | 8.78 | Sweden | 2.00 | Indonesia | 0.90 | Indonesia | 0.30 |
| 3 | Philippines | 0.70 | Japan | 0.40 | South Africa | 0.50 | Japan | 0.41 | Sweden | 8.58 | Mexico | 2.00 | Poland | 0.88 | Poland | 0.33 |
| 4 | Mexico | 0.56 | UK | 0.40 | Egypt | 0.49 | Sweden | 0.41 | Mexico | 8.49 | Poland | 2.17 | Israel | 0.87 | Israel | 0.34 |
| 5 | Hong Kong | 0.53 | US | 0.42 | Hong Kong | 0.47 | India | 0.42 | India | 8.40 | Hong Kong | 2.19 | China | 0.86 | Philippines | 0.34 |
| 6 | Kenya | 0.52 | Sweden | 0.43 | Philippines | 0.46 | UK | 0.42 | Tanzania | 8.23 | Philippines | 2.20 | Philippines | 0.86 | China | 0.35 |
| 7 | Australia | 0.43 | Argentina | 0.44 | Mexico | 0.44 | United States | 0.44 | Philippines | 8.14 | Australia | 2.27 | Australia | 0.84 | Australia | 0.37 |
| 8 | Turkey | 0.42 | Philippines | 0.46 | Tanzania | 0.42 | Poland | 0.44 | Argentina | 8.08 | Egypt | 2.30 | Sweden | 0.82 | Sweden | 0.38 |
| 9 | Indonesia | 0.42 | Poland | 0.47 | Germany | 0.42 | Brazil | 0.45 | Australia | 7.80 | Japan | 2.30 | Tanzania | 0.81 | Tanzania | 0.39 |
| 10 | Nigeria | 0.40 | Germany | 0.47 | Nigeria | 0.41 | Turkey | 0.45 | Brazil | 7.79 | Germany | 2.39 | Spain | 0.81 | Spain | 0.39 |
| 11 | Israel | 0.39 | Brazil | 0.48 | Kenya | 0.38 | Israel | 0.47 | Kenya | 7.77 | Spain | 2.48 | Germany | 0.81 | Germany | 0.39 |
| 12 | South Africa | 0.38 | Spain | 0.48 | Australia | 0.38 | Argentina | 0.49 | Israel | 7.72 | Israel | 2.49 | Kenya | 0.80 | Kenya | 0.40 |
| 13 | Spain | 0.36 | South Africa | 0.49 | Argentina | 0.38 | Kenya | 0.49 | Poland | 7.72 | Argentina | 2.53 | Egypt | 0.75 | Egypt | 0.43 |
| 14 | Brazil | 0.35 | Israel | 0.49 | Israel | 0.32 | Australia | 0.49 | South Africa | 7.65 | UK | 2.54 | Mexico | 0.75 | Mexico | 0.43 |
| 15 | Germany | 0.34 | Nigeria | 0.49 | Turkey | 0.29 | Nigeria | 0.49 | Spain | 7.50 | Brazil | 2.56 | Nigeria | 0.73 | Nigeria | 0.45 |
| 16 | Poland | 0.33 | Indonesia | 0.49 | Brazil | 0.27 | Tanzania | 0.49 | Hong Kong | 7.40 | United States | 2.65 | Argentina | 0.71 | Argentina | 0.45 |
| 17 | Argentina | 0.25 | Turkey | 0.49 | Poland | 0.26 | Germany | 0.49 | Nigeria | 7.24 | South Africa | 2.71 | UK | 0.71 | UK | 0.45 |
| 18 | Sweden | 0.24 | Australia | 0.50 | US | 0.25 | Mexico | 0.50 | UK | 7.13 | Tanzania | 2.76 | Hong Kong | 0.70 | Hong Kong | 0.46 |
| 19 | US | 0.23 | Mexico | 0.50 | UK | 0.23 | Philippines | 0.50 | US | 7.07 | Nigeria | 2.81 | US | 0.69 | US | 0.46 |
| 20 | UK | 0.20 | Hong Kong | 0.50 | Sweden | 0.22 | Hong Kong | 0.50 | Germany | 6.97 | India | 2.87 | Turkey | 0.64 | Turkey | 0.48 |
| 21 | Japan | 0.19 | Kenya | 0.50 | Japan | 0.22 | Egypt | 0.50 | Turkey | 6.87 | Kenya | 3.07 | Brazil | 0.62 | Brazil | 0.49 |
| 22 | China | - |  |  | Spain | 0.14 | South Africa | 0.50 | Japan | 6.03 | Turkey | 3.35 | Japan | 0.56 | Japan | 0.50 |
| 23 | Egypt | - |  |  | China | - |  |  | China | - |  |  | South Africa | 0.55 | South Africa | 0.50 |
| Meta-analytic mean and heterogeneity | | | | | | | | | | | | | | | | |
| Estimate | 0.39 | | | | 0.37 | | | | 7.40 | | | | 0.77 | | | |
| 95% CI | (0.30,0.48) | | | | (0.30,0.44) | | | | (6.69,8.12) | | | | (0.72,0.81) | | | |
| Heterogeneity (tau) | 0.22 | | | | 0.18 | | | | 1.75 | | | | 0.1 | | | |
| Mean within country SD | 0.46 | | | | 0.46 | | | | 2.5 | | | | 0.41 | | | |
| ICC | 0.19 | | | | 0.13 | | | | 0.33 | | | | 0.06 | | | |
| Variability index | 0.64 | | | | 0.6 | | | | 0.46 | | | | 0.48 | | | |

|  | Social well-being | | | | Social participation | | | | | | | | | | | |
| --- | --- | --- | --- | --- | --- | --- | --- | --- | --- | --- | --- | --- | --- | --- | --- | --- |
|  | **Trust within country** | | | | **Ever been married** | | | | **Currently divorced** | | | | **Number of children** | | | |
| Rank | **Country** | **Mean** | **Country** | **St dev** | **Country** | **Mean** | **Country** | **St dev** | **Country** | **Mean** | **Country** | **St dev** | **Country** | **Mean** | **Country** | **St dev** |
| 1 | China | 0.88 | China | 0.32 | India | 0.82 | India | 0.39 | India | 0.00 | Philippines | 0.04 | Nigeria | 2.85 | China | 0.79 |
| 2 | Philippines | 0.85 | Philippines | 0.36 | Indonesia | 0.80 | Egypt | 0.40 | Philippines | 0.00 | India | 0.05 | Tanzania | 2.64 | Poland | 0.89 |
| 3 | Australia | 0.84 | Australia | 0.37 | Egypt | 0.80 | Indonesia | 0.40 | Tanzania | 0.01 | Kenya | 0.10 | Kenya | 2.03 | Germany | 0.96 |
| 4 | India | 0.82 | India | 0.38 | China | 0.77 | China | 0.42 | Kenya | 0.01 | Nigeria | 0.10 | South Africa | 1.91 | Australia | 0.96 |
| 5 | Hong Kong | 0.81 | Hong Kong | 0.39 | Poland | 0.77 | Poland | 0.42 | Nigeria | 0.01 | Tanzania | 0.11 | Philippines | 1.84 | Hong Kong | 1.01 |
| 6 | Sweden | 0.79 | Sweden | 0.41 | Hong Kong | 0.75 | Hong Kong | 0.43 | Egypt | 0.02 | South Africa | 0.14 | Egypt | 1.77 | Sweden | 1.03 |
| 7 | Indonesia | 0.78 | Indonesia | 0.41 | Japan | 0.75 | Japan | 0.43 | China | 0.02 | Egypt | 0.15 | India | 1.50 | UK | 1.04 |
| 8 | Tanzania | 0.74 | Tanzania | 0.44 | Turkey | 0.74 | Turkey | 0.44 | South Africa | 0.02 | China | 0.15 | Indonesia | 1.31 | Spain | 1.25 |
| 9 | Japan | 0.73 | Japan | 0.44 | Tanzania | 0.72 | Tanzania | 0.45 | Indonesia | 0.03 | Indonesia | 0.17 | Mexico | 1.16 | United States | 1.28 |
| 10 | Germany | 0.72 | Germany | 0.45 | Israel | 0.72 | Israel | 0.45 | Hong Kong | 0.04 | Hong Kong | 0.18 | Argentina | 1.07 | Turkey | 1.33 |
| 11 | UK | 0.67 | UK | 0.47 | US | 0.70 | United States | 0.46 | Turkey | 0.04 | Mexico | 0.20 | Turkey | 1.04 | Brazil | 1.34 |
| 12 | Mexico | 0.65 | Mexico | 0.48 | Kenya | 0.68 | South Africa | 0.46 | Mexico | 0.04 | Turkey | 0.21 | Israel | 1.03 | Mexico | 1.42 |
| 13 | Poland | 0.64 | Poland | 0.48 | Australia | 0.66 | Kenya | 0.47 | Poland | 0.05 | Argentina | 0.22 | Brazil | 0.92 | Japan | 1.48 |
| 14 | Israel | 0.63 | South Africa | 0.48 | Germany | 0.66 | Nigeria | 0.47 | Sweden | 0.05 | Poland | 0.22 | China | 0.74 | Argentina | 1.49 |
| 15 | Spain | 0.61 | Turkey | 0.48 | Nigeria | 0.66 | Australia | 0.48 | Argentina | 0.05 | Sweden | 0.23 | Spain | 0.63 | Israel | 1.49 |
| 16 | Argentina | 0.55 | Israel | 0.48 | UK | 0.63 | Germany | 0.48 | Israel | 0.07 | Brazil | 0.25 | US | 0.59 | Egypt | 1.52 |
| 17 | Egypt | 0.54 | Spain | 0.49 | Spain | 0.62 | UK | 0.48 | Brazil | 0.07 | Israel | 0.26 | UK | 0.57 | Indonesia | 1.54 |
| 18 | US | 0.53 | Argentina | 0.50 | Philippines | 0.55 | Spain | 0.48 | Germany | 0.08 | Germany | 0.27 | Hong Kong | 0.56 | Philippines | 1.62 |
| 19 | Kenya | 0.52 | Egypt | 0.50 | Sweden | 0.54 | Argentina | 0.49 | UK | 0.08 | UK | 0.27 | Sweden | 0.55 | India | 1.77 |
| 20 | Nigeria | 0.52 | Brazil | 0.50 | Mexico | 0.54 | Philippines | 0.50 | Spain | 0.08 | Spain | 0.28 | Poland | 0.53 | Kenya | 1.85 |
| 21 | Brazil | 0.46 | United States | 0.50 | Brazil | 0.50 | Mexico | 0.50 | Australia | 0.09 | Australia | 0.28 | Australia | 0.52 | South Africa | 1.94 |
| 22 | Turkey | 0.37 | Kenya | 0.50 | Argentina | 0.41 | Sweden | 0.50 | Japan | 0.10 | United States | 0.29 | Japan | 0.41 | Tanzania | 2.04 |
| 23 | South Africa | 0.37 | Nigeria | 0.50 | South Africa | 0.30 | Brazil | 0.50 | US | 0.00 | Japan | 0.31 | Germany | 0.39 | Nigeria | 2.61 |
| Meta-analytic mean and heterogeneity | | | | | | | | | | | | | | | | |
| Estimate | 0.65 | | | | 0.66 | | | | 0.05 | | | | 1.15 | | | |
| 95% CI | (0.59,0.72) | | | | (0.60,0.71) | | | | (0.03,0.06) | | | | (0.86,1.45) | | | |
| Heterogeneity (tau) | 0.15 | | | | 0.13 | | | | 0.03 | | | | 0.71 | | | |
| Mean within country SD | 0.45 | | | | 0.46 | | | | 0.21 | | | | 1.48 | | | |
| ICC | 0.1 | | | | 0.07 | | | | 0.02 | | | | 0.19 | | | |
| Variability index | 0.57 | | | | 0.54 | | | | 0.26 | | | | 0.28 | | | |

|  | Social  participation | | | | | | | | Social  distress | | | | | | | |
| --- | --- | --- | --- | --- | --- | --- | --- | --- | --- | --- | --- | --- | --- | --- | --- | --- |
|  | **Community**  **participation** | | | | **Religious**  **attendance** | | | | **Loneliness** | | | | **Perceived**  **discrimination** | | | |
| Rank | **Country** | **Mean** | **Country** | **St dev** | **Country** | **Mean** | **Country** | **St dev** | **Country** | **Mean** | **Country** | **St dev** | **Country** | **Mean** | **Country** | **St dev** |
| 1 | Nigeria | 0.33 | Egypt | 0.26 | Nigeria | 0.87 | Japan | 0.18 | Israel | 2.30 | Poland | 2.25 | Sweden | 0.10 | Sweden | 0.30 |
| 2 | Indonesia | 0.32 | Japan | 0.29 | Kenya | 0.78 | Sweden | 0.21 | Poland | 2.44 | Israel | 2.40 | Poland | 0.13 | Poland | 0.34 |
| 3 | Australia | 0.28 | Poland | 0.30 | Tanzania | 0.76 | China | 0.21 | Indonesia | 2.49 | China | 2.44 | Tanzania | 0.14 | Tanzania | 0.34 |
| 4 | Kenya | 0.27 | United States | 0.34 | Indonesia | 0.75 | Germany | 0.26 | Germany | 2.99 | Hong Kong | 2.55 | Germany | 0.15 | Germany | 0.35 |
| 5 | South Africa | 0.24 | India | 0.34 | Turkey | 0.52 | Australia | 0.33 | Sweden | 3.03 | Germany | 2.64 | Japan | 0.16 | Japan | 0.37 |
| 6 | Spain | 0.23 | China | 0.36 | Philippines | 0.52 | Nigeria | 0.33 | Nigeria | 3.22 | Japan | 2.66 | China | 0.17 | China | 0.37 |
| 7 | Germany | 0.23 | Mexico | 0.37 | South Africa | 0.49 | UK | 0.36 | Hong Kong | 3.26 | Sweden | 2.66 | Australia | 0.18 | Australia | 0.38 |
| 8 | UK | 0.22 | Brazil | 0.39 | India | 0.48 | Spain | 0.36 | US | 3.29 | Spain | 2.71 | Spain | 0.19 | Spain | 0.40 |
| 9 | Turkey | 0.21 | Philippines | 0.39 | Egypt | 0.38 | Argentina | 0.40 | Mexico | 3.31 | Australia | 2.80 | Israel | 0.21 | Israel | 0.40 |
| 10 | Hong Kong | 0.21 | Argentina | 0.40 | Brazil | 0.35 | Kenya | 0.42 | Spain | 3.32 | United States | 2.84 | Indonesia | 0.21 | Indonesia | 0.41 |
| 11 | Tanzania | 0.20 | Sweden | 0.40 | Poland | 0.35 | United States | 0.42 | Australia | 3.33 | UK | 2.91 | UK | 0.22 | India | 0.41 |
| 12 | Israel | 0.20 | Israel | 0.40 | Mexico | 0.33 | Tanzania | 0.43 | China | 3.34 | Nigeria | 2.93 | India | 0.22 | UK | 0.42 |
| 13 | Philippines | 0.19 | Tanzania | 0.40 | Israel | 0.31 | Indonesia | 0.44 | Tanzania | 3.37 | Indonesia | 2.97 | Mexico | 0.23 | Mexico | 0.42 |
| 14 | Argentina | 0.19 | Turkey | 0.41 | Hong Kong | 0.27 | Hong Kong | 0.44 | UK | 3.51 | South Africa | 3.05 | Argentina | 0.24 | Argentina | 0.43 |
| 15 | Sweden | 0.19 | Hong Kong | 0.41 | US | 0.22 | Israel | 0.46 | Philippines | 3.52 | Philippines | 3.20 | US | 0.26 | United States | 0.44 |
| 16 | Brazil | 0.18 | UK | 0.41 | Argentina | 0.19 | Mexico | 0.47 | Kenya | 3.54 | Mexico | 3.23 | Philippines | 0.26 | Philippines | 0.44 |
| 17 | Mexico | 0.16 | Germany | 0.42 | Spain | 0.16 | Poland | 0.48 | Argentina | 3.56 | Argentina | 3.30 | Hong Kong | 0.28 | Hong Kong | 0.45 |
| 18 | China | 0.15 | Spain | 0.42 | UK | 0.15 | Brazil | 0.48 | South Africa | 3.67 | Brazil | 3.44 | Turkey | 0.29 | Turkey | 0.45 |
| 19 | India | 0.13 | South Africa | 0.43 | Australia | 0.12 | Egypt | 0.49 | Egypt | 3.82 | Turkey | 3.45 | Kenya | 0.30 | Kenya | 0.46 |
| 20 | US | 0.13 | Kenya | 0.45 | Germany | 0.07 | India | 0.50 | India | 3.84 | Tanzania | 3.52 | Brazil | 0.31 | Brazil | 0.46 |
| 21 | Poland | 0.10 | Australia | 0.45 | China | 0.05 | Philippines | 0.50 | Brazil | 3.91 | Kenya | 3.53 | Nigeria | 0.34 | Nigeria | 0.47 |
| 22 | Japan | 0.09 | Indonesia | 0.47 | Sweden | 0.04 | South Africa | 0.50 | Japan | 4.02 | Egypt | 3.74 | South Africa | 0.37 | South Africa | 0.48 |
| 23 | Egypt | 0.07 | Nigeria | 0.47 | Japan | 0.03 | Turkey | 0.50 | Turkey | 4.57 | India | 4.00 | Egypt | 0.47 | Egypt | 0.50 |
| Meta-analytic mean and heterogeneity | | | | | | | | | | | | | | | | |
| Estimate | 0.20 | | | | 0.36 | | | | 3.37 | | | | 0.24 | | | |
| 95% CI | (0.17,0.22) | | | | (0.25,0.46) | | | | (3.16,3.58) | | | | (0.20,0.27) | | | |
| Heterogeneity (tau) | 0.07 | | | | 0.25 | | | | 0.51 | | | | 0.09 | | | |
| Mean within country SD | 0.39 | | | | 0.41 | | | | 3.04 | | | | 0.42 | | | |
| ICC | 0.03 | | | | 0.28 | | | | 0.03 | | | | 0.04 | | | |
| Variability index | 0.41 | | | | 0.65 | | | | 0.32 | | | | 0.46 | | | |

|  | Character and  prosocial behavior | | | | | | | | | | | | | | | |
| --- | --- | --- | --- | --- | --- | --- | --- | --- | --- | --- | --- | --- | --- | --- | --- | --- |
|  | **Orientation to**  **promote good** | | | | **Delayed**  **gratification** | | | | **Hope** | | | | **Gratitude** | | | |
| Rank | **Country** | **Mean** | **Country** | **St dev** | **Country** | **Mean** | **Country** | **St dev** | **Country** | **Mean** | **Country** | **St dev** | **Country** | **Mean** | **Country** | **St dev** |
| 1 | Indonesia | 8.63 | Mexico | 1.59 | Philippines | 8.42 | Australia | 1.94 | Indonesia | 9.17 | Indonesia | 1.44 | Indonesia | 8.93 | Mexico | 1.75 |
| 2 | Argentina | 8.63 | Israel | 1.60 | Indonesia | 8.35 | United States | 1.96 | Mexico | 9.00 | Mexico | 1.56 | Mexico | 8.84 | Indonesia | 1.76 |
| 3 | Mexico | 8.62 | Australia | 1.61 | Nigeria | 8.32 | Hong Kong | 1.96 | Philippines | 8.92 | Argentina | 1.67 | Philippines | 8.64 | Poland | 1.82 |
| 4 | Brazil | 8.59 | Argentina | 1.64 | Mexico | 8.27 | Philippines | 1.97 | Argentina | 8.92 | Israel | 1.73 | Brazil | 8.61 | Argentina | 1.99 |
| 5 | Philippines | 8.54 | Poland | 1.64 | Argentina | 8.12 | Spain | 2.00 | Brazil | 8.87 | Poland | 1.78 | Argentina | 8.53 | Philippines | 2.00 |
| 6 | Israel | 8.38 | Spain | 1.69 | Brazil | 8.10 | Indonesia | 2.02 | Kenya | 8.76 | Philippines | 1.82 | Nigeria | 8.42 | China | 2.00 |
| 7 | India | 8.35 | United States | 1.70 | Kenya | 8.04 | Sweden | 2.04 | Nigeria | 8.65 | Spain | 1.87 | US | 8.14 | Israel | 2.03 |
| 8 | Egypt | 8.35 | Sweden | 1.71 | South Africa | 7.67 | Mexico | 2.04 | South Africa | 8.59 | Brazil | 1.88 | Kenya | 8.07 | Brazil | 2.05 |
| 9 | Nigeria | 8.21 | Brazil | 1.79 | Israel | 7.52 | UK | 2.05 | Israel | 8.40 | China | 1.89 | Israel | 7.90 | Spain | 2.09 |
| 10 | Tanzania | 8.18 | Indonesia | 1.80 | Spain | 7.51 | Japan | 2.05 | Tanzania | 8.35 | Germany | 1.95 | Tanzania | 7.85 | Nigeria | 2.11 |
| 11 | Kenya | 8.16 | China | 1.80 | Tanzania | 7.50 | Nigeria | 2.07 | India | 8.32 | Nigeria | 1.97 | South Africa | 7.84 | Germany | 2.16 |
| 12 | Spain | 8.10 | UK | 1.81 | US | 7.45 | China | 2.09 | Egypt | 8.18 | Australia | 2.02 | Australia | 7.84 | United States | 2.20 |
| 13 | Poland | 7.92 | Germany | 1.83 | Australia | 7.25 | Argentina | 2.11 | Spain | 8.08 | South Africa | 2.07 | Spain | 7.79 | Hong Kong | 2.22 |
| 14 | US | 7.87 | Hong Kong | 1.94 | India | 7.21 | Germany | 2.15 | Poland | 7.94 | Hong Kong | 2.07 | Egypt | 7.74 | Australia | 2.23 |
| 15 | Australia | 7.86 | Philippines | 1.97 | Turkey | 7.17 | Brazil | 2.26 | Turkey | 7.76 | United States | 2.15 | India | 7.68 | Japan | 2.24 |
| 16 | South Africa | 7.82 | Japan | 2.06 | Hong Kong | 7.11 | Israel | 2.31 | US | 7.70 | Sweden | 2.22 | Germany | 7.64 | Sweden | 2.24 |
| 17 | Germany | 7.69 | Egypt | 2.08 | Sweden | 6.99 | Poland | 2.31 | Australia | 7.70 | Japan | 2.23 | Sweden | 7.49 | UK | 2.35 |
| 18 | Turkey | 7.69 | Nigeria | 2.12 | UK | 6.96 | South Africa | 2.44 | Germany | 7.65 | UK | 2.24 | UK | 7.41 | South Africa | 2.42 |
| 19 | UK | 7.61 | South Africa | 2.36 | Egypt | 6.94 | Turkey | 2.65 | China | 7.46 | Kenya | 2.33 | Poland | 7.35 | Egypt | 2.52 |
| 20 | Sweden | 7.56 | Turkey | 2.37 | Germany | 6.94 | Kenya | 2.79 | UK | 7.39 | Egypt | 2.44 | China | 7.26 | Kenya | 2.73 |
| 21 | Hong Kong | 7.32 | Kenya | 2.68 | Poland | 6.80 | Egypt | 3.00 | Hong Kong | 7.29 | Tanzania | 2.65 | Hong Kong | 6.97 | Turkey | 2.73 |
| 22 | China | 7.26 | India | 2.68 | China | 6.74 | Tanzania | 3.22 | Sweden | 7.26 | Turkey | 2.68 | Turkey | 6.95 | Tanzania | 2.88 |
| 23 | Japan | 6.12 | Tanzania | 2.69 | Japan | 5.16 | India | 3.48 | Japan | 5.95 | India | 2.77 | Japan | 5.81 | India | 3.15 |
| Meta-analytic mean and heterogeneity | | | | | | | | | | | | | | | | |
| Estimate | 7.98 | | | | 7.42 | | | | 8.10 | | | | 7.81 | | | |
| 95% CI | (7.74,8.21) | | | | (7.11,7.72) | | | | (7.79,8.41) | | | | (7.52,8.10) | | | |
| Heterogeneity (tau) | 0.58 | | | | 0.73 | | | | 0.76 | | | | 0.71 | | | |
| Mean within country SD | 1.99 | | | | 2.34 | | | | 2.09 | | | | 2.27 | | | |
| ICC | 0.08 | | | | 0.09 | | | | 0.12 | | | | 0.09 | | | |
| Variability index | 0.29 | | | | 0.33 | | | | 0.33 | | | | 0.33 | | | |

|  | Character and  prosocial behavior | | | | | | | | | | | | | | | |
| --- | --- | --- | --- | --- | --- | --- | --- | --- | --- | --- | --- | --- | --- | --- | --- | --- |
|  | **Showing love/care** | | | | **Forgivingness** | | | | **Charitable giving** | | | | **Helping strangers** | | | |
| Rank | **Country** | **Mean** | **Country** | **St dev** | **Country** | **Mean** | **Country** | **St dev** | **Country** | **Mean** | **Country** | **St dev** | **Country** | **Mean** | **Country** | **St dev** |
| 1 | Philippines | 9.05 | Israel | 1.66 | Nigeria | 0.92 | Nigeria | 0.27 | Indonesia | 0.79 | Japan | 0.29 | Nigeria | 0.83 | Japan | 0.32 |
| 2 | Indonesia | 8.85 | United States | 1.71 | Egypt | 0.87 | Egypt | 0.34 | UK | 0.61 | Philippines | 0.35 | Egypt | 0.72 | Nigeria | 0.38 |
| 3 | Tanzania | 8.72 | Philippines | 1.71 | Indonesia | 0.85 | Indonesia | 0.36 | Egypt | 0.58 | South Africa | 0.40 | China | 0.70 | Poland | 0.44 |
| 4 | Mexico | 8.71 | Australia | 1.75 | Kenya | 0.85 | Kenya | 0.36 | Israel | 0.55 | Argentina | 0.40 | Brazil | 0.69 | Egypt | 0.45 |
| 5 | Israel | 8.60 | Indonesia | 1.78 | Tanzania | 0.84 | South Africa | 0.37 | Australia | 0.53 | Poland | 0.40 | Argentina | 0.67 | China | 0.46 |
| 6 | South Africa | 8.59 | China | 1.83 | South Africa | 0.84 | Tanzania | 0.37 | Sweden | 0.52 | Mexico | 0.40 | Kenya | 0.66 | Brazil | 0.46 |
| 7 | Kenya | 8.57 | Mexico | 1.85 | US | 0.78 | Australia | 0.41 | Hong Kong | 0.51 | Indonesia | 0.41 | Hong Kong | 0.65 | Argentina | 0.47 |
| 8 | US | 8.56 | Sweden | 1.87 | Australia | 0.78 | United States | 0.41 | US | 0.49 | Tanzania | 0.45 | Israel | 0.64 | Tanzania | 0.47 |
| 9 | Argentina | 8.51 | Spain | 1.96 | Spain | 0.78 | Spain | 0.41 | Nigeria | 0.48 | Kenya | 0.45 | Mexico | 0.63 | Kenya | 0.47 |
| 10 | Brazil | 8.47 | Poland | 1.98 | Mexico | 0.77 | Mexico | 0.42 | India | 0.39 | Turkey | 0.46 | Philippines | 0.63 | Hong Kong | 0.48 |
| 11 | Nigeria | 8.38 | UK | 1.98 | Sweden | 0.77 | Sweden | 0.42 | Spain | 0.36 | Brazil | 0.46 | Australia | 0.62 | Israel | 0.48 |
| 12 | Australia | 8.31 | Nigeria | 1.99 | India | 0.75 | India | 0.43 | Germany | 0.36 | China | 0.48 | Turkey | 0.61 | Philippines | 0.48 |
| 13 | Spain | 8.28 | Germany | 2.02 | Germany | 0.75 | Germany | 0.44 | China | 0.36 | Spain | 0.48 | US | 0.59 | Mexico | 0.48 |
| 14 | Egypt | 8.27 | South Africa | 2.02 | Philippines | 0.74 | Philippines | 0.44 | Brazil | 0.31 | Germany | 0.48 | South Africa | 0.58 | Australia | 0.49 |
| 15 | India | 8.20 | Argentina | 2.13 | Israel | 0.74 | Argentina | 0.44 | Turkey | 0.31 | India | 0.49 | UK | 0.56 | Turkey | 0.49 |
| 16 | UK | 8.14 | Brazil | 2.18 | Argentina | 0.74 | Israel | 0.44 | Kenya | 0.28 | UK | 0.49 | India | 0.56 | United States | 0.49 |
| 17 | Sweden | 8.11 | Japan | 2.20 | Brazil | 0.73 | Brazil | 0.45 | Tanzania | 0.27 | Egypt | 0.49 | Spain | 0.53 | South Africa | 0.49 |
| 18 | Turkey | 7.89 | Tanzania | 2.32 | UK | 0.72 | UK | 0.45 | Mexico | 0.21 | Israel | 0.50 | Germany | 0.51 | Sweden | 0.50 |
| 19 | Germany | 7.81 | Kenya | 2.42 | Poland | 0.65 | Poland | 0.48 | Argentina | 0.20 | Australia | 0.50 | Indonesia | 0.50 | India | 0.50 |
| 20 | Poland | 7.80 | Hong Kong | 2.56 | Hong Kong | 0.62 | Hong Kong | 0.48 | Poland | 0.20 | Hong Kong | 0.50 | Sweden | 0.44 | UK | 0.50 |
| 21 | China | 7.36 | Turkey | 2.62 | Japan | 0.57 | Turkey | 0.49 | South Africa | 0.19 | Nigeria | 0.50 | Tanzania | 0.34 | Spain | 0.50 |
| 22 | Hong Kong | 6.52 | Egypt | 2.67 | China | 0.55 | Japan | 0.50 | Philippines | 0.14 | Sweden | 0.50 | Poland | 0.26 | Germany | 0.50 |
| 23 | Japan | 5.96 | India | 3.03 | Turkey | 0.41 | China | 0.50 | Japan | 0.10 | United States | 0.50 | Japan | 0.11 | Indonesia | 0.50 |
| Meta-analytic mean and heterogeneity | | | | | | | | | | | | | | | | |
| Estimate | 8.16 | | | | 0.74 | | | | 0.38 | | | | 0.57 | | | |
| 95% CI | (7.86,8.45) | | | | (0.69,0.79) | | | | (0.31,0.45) | | | | (0.50,0.63) | | | |
| Heterogeneity (tau) | 0.72 | | | | 0.12 | | | | 0.17 | | | | 0.16 | | | |
| Mean within country SD | 2.13 | | | | 0.42 | | | | 0.45 | | | | 0.47 | | | |
| ICC | 0.1 | | | | 0.07 | | | | 0.13 | | | | 0.1 | | | |
| Variability index | 0.32 | | | | 0.51 | | | | 0.59 | | | | 0.58 | | | |

|  | Character and  prosocial behavior | | | | Physical health  & health behavior | | | | | | | | | | | |
| --- | --- | --- | --- | --- | --- | --- | --- | --- | --- | --- | --- | --- | --- | --- | --- | --- |
|  | **Volunteering** | | | | **Self-rated**  **physical health** | | | | **Health problems** | | | | **Pain in**  **past 4 weeks** | | | |
| Rank | **Country** | **Mean** | **Country** | **St dev** | **Country** | **Mean** | **Country** | **St dev** | **Country** | **Mean** | **Country** | **St dev** | **Country** | **Mean** | **Country** | **St dev** |
| 1 | Nigeria | 0.51 | Egypt | 0.21 | Indonesia | 8.29 | China | 1.79 | Poland | 0.13 | Poland | 0.34 | Israel | 0.25 | Israel | 0.43 |
| 2 | Indonesia | 0.46 | Poland | 0.28 | Nigeria | 8.27 | Israel | 1.89 | Nigeria | 0.14 | Turkey | 0.34 | China | 0.29 | South Africa | 0.45 |
| 3 | Kenya | 0.40 | Japan | 0.28 | Israel | 8.08 | Poland | 1.90 | Israel | 0.14 | Israel | 0.35 | South Africa | 0.29 | China | 0.45 |
| 4 | Hong Kong | 0.35 | Tanzania | 0.31 | Kenya | 8.06 | United States | 1.93 | Turkey | 0.14 | Nigeria | 0.35 | Poland | 0.32 | Poland | 0.47 |
| 5 | China | 0.34 | Sweden | 0.32 | Mexico | 7.79 | Mexico | 1.96 | Indonesia | 0.15 | Kenya | 0.36 | Japan | 0.33 | Japan | 0.47 |
| 6 | Australia | 0.34 | Turkey | 0.36 | Tanzania | 7.78 | Indonesia | 1.98 | Kenya | 0.15 | Indonesia | 0.36 | Indonesia | 0.34 | Indonesia | 0.48 |
| 7 | UK | 0.30 | Spain | 0.38 | Philippines | 7.69 | Hong Kong | 1.99 | China | 0.15 | China | 0.36 | Mexico | 0.38 | Mexico | 0.49 |
| 8 | India | 0.29 | Brazil | 0.39 | Poland | 7.68 | Australia | 2.06 | Tanzania | 0.16 | Tanzania | 0.37 | Nigeria | 0.39 | Nigeria | 0.49 |
| 9 | US | 0.27 | Israel | 0.40 | South Africa | 7.52 | Sweden | 2.07 | Mexico | 0.17 | Mexico | 0.38 | Sweden | 0.40 | Egypt | 0.49 |
| 10 | Philippines | 0.25 | Argentina | 0.41 | Argentina | 7.26 | Spain | 2.07 | Japan | 0.18 | Japan | 0.38 | Germany | 0.41 | Sweden | 0.49 |
| 11 | South Africa | 0.25 | Germany | 0.41 | China | 7.24 | Japan | 2.09 | Argentina | 0.19 | Argentina | 0.39 | Philippines | 0.43 | Brazil | 0.49 |
| 12 | Argentina | 0.21 | Mexico | 0.41 | Brazil | 7.16 | Germany | 2.10 | Brazil | 0.19 | Brazil | 0.40 | Argentina | 0.44 | Germany | 0.49 |
| 13 | Israel | 0.21 | South Africa | 0.43 | Hong Kong | 7.12 | Philippines | 2.14 | Spain | 0.20 | Spain | 0.40 | Kenya | 0.45 | Philippines | 0.50 |
| 14 | Mexico | 0.21 | Philippines | 0.44 | India | 7.00 | Argentina | 2.19 | Hong Kong | 0.21 | Hong Kong | 0.41 | Hong Kong | 0.45 | Argentina | 0.50 |
| 15 | Germany | 0.21 | United States | 0.45 | Spain | 6.84 | Nigeria | 2.20 | South Africa | 0.22 | South Africa | 0.41 | Spain | 0.47 | Australia | 0.50 |
| 16 | Brazil | 0.19 | India | 0.46 | US | 6.81 | UK | 2.29 | US | 0.24 | United States | 0.43 | India | 0.50 | Kenya | 0.50 |
| 17 | Spain | 0.17 | UK | 0.46 | Egypt | 6.81 | Brazil | 2.31 | Egypt | 0.25 | Egypt | 0.44 | US | 0.51 | Hong Kong | 0.50 |
| 18 | Turkey | 0.15 | Australia | 0.47 | Turkey | 6.70 | Kenya | 2.66 | Sweden | 0.26 | Sweden | 0.44 | Tanzania | 0.52 | Spain | 0.50 |
| 19 | Sweden | 0.11 | China | 0.47 | Germany | 6.62 | South Africa | 2.72 | India | 0.28 | Australia | 0.45 | Turkey | 0.53 | UK | 0.50 |
| 20 | Tanzania | 0.11 | Hong Kong | 0.48 | Australia | 6.49 | Turkey | 2.72 | Australia | 0.28 | India | 0.45 | UK | 0.53 | India | 0.50 |
| 21 | Japan | 0.09 | Kenya | 0.49 | Sweden | 6.41 | Egypt | 2.81 | Germany | 0.30 | Germany | 0.46 | Australia | 0.56 | Tanzania | 0.50 |
| 22 | Poland | 0.08 | Indonesia | 0.50 | UK | 6.37 | Tanzania | 3.02 | UK | 0.31 | UK | 0.46 | Brazil | 0.59 | Turkey | 0.50 |
| 23 | Egypt | 0.04 | Nigeria | 0.50 | Japan | 5.97 | India | 3.42 | Philippines | 0.34 | Philippines | 0.48 | Egypt | 0.60 | United States | 0.50 |
| Meta-analytic mean and heterogeneity | | | | | | | | | | | | | | | | |
| Estimate | 0.24 | | | | 7.21 | | | | 0.21 | | | | 0.43 | | | |
| 95% CI | (0.19,0.29) | | | | (6.95,7.48) | | | | (0.18,0.23) | | | | (0.39,0.48) | | | |
| Heterogeneity (tau) | 0.12 | | | | 0.65 | | | | 0.06 | | | | 0.1 | | | |
| Mean within country SD | 0.41 | | | | 2.31 | | | | 0.4 | | | | 0.49 | | | |
| ICC | 0.08 | | | | 0.07 | | | | 0.02 | | | | 0.04 | | | |
| Variability index | 0.51 | | | | 0.32 | | | | 0.41 | | | | 0.5 | | | |

|  | Physical health  & health behavior | | | | | | | | | | | | Socioeconomic  outcomes | | | |
| --- | --- | --- | --- | --- | --- | --- | --- | --- | --- | --- | --- | --- | --- | --- | --- | --- |
|  | **Daily smoker** | | | | **Number of**  **drinks per week** | | | | **Days exercise**  **per week** | | | | **Financial security** | | | |
| Rank | **Country** | **Mean** | **Country** | **St dev** | **Country** | **Mean** | **Country** | **St dev** | **Country** | **Mean** | **Country** | **St dev** | **Country** | **Mean** | **Country** | **St dev** |
| 1 | Nigeria | 0.04 | Tanzania | 0.20 | Egypt | 0.01 | Egypt | 0.21 | Philippines | 3.82 | Israel | 1.64 | Sweden | 7.23 | Poland | 2.37 |
| 2 | Tanzania | 0.04 | Nigeria | 0.21 | Indonesia | 0.15 | Indonesia | 1.66 | Tanzania | 3.26 | Egypt | 1.70 | Israel | 7.16 | China | 2.38 |
| 3 | Kenya | 0.05 | Kenya | 0.23 | India | 0.36 | Kenya | 2.82 | India | 3.14 | Poland | 1.87 | Poland | 6.98 | Israel | 2.49 |
| 4 | India | 0.08 | India | 0.27 | Kenya | 0.42 | Hong Kong | 2.87 | Nigeria | 3.01 | China | 2.06 | China | 6.89 | Hong Kong | 2.68 |
| 5 | Sweden | 0.10 | Sweden | 0.29 | Tanzania | 0.47 | Mexico | 3.54 | Indonesia | 2.96 | Germany | 2.15 | Hong Kong | 6.79 | Sweden | 2.79 |
| 6 | US | 0.10 | United States | 0.31 | Nigeria | 0.55 | Argentina | 3.54 | Turkey | 2.81 | Hong Kong | 2.17 | Australia | 6.69 | Germany | 2.96 |
| 7 | Australia | 0.12 | Australia | 0.32 | Philippines | 0.97 | Poland | 3.56 | Sweden | 2.77 | US | 2.25 | US | 6.49 | Japan | 2.97 |
| 8 | UK | 0.16 | UK | 0.37 | Turkey | 1.16 | Nigeria | 3.56 | China | 2.71 | Sweden | 2.26 | Germany | 6.23 | Australia | 2.99 |
| 9 | Brazil | 0.20 | Brazil | 0.40 | Israel | 1.25 | China | 3.73 | Spain | 2.68 | Australia | 2.27 | Indonesia | 6.08 | UK | 3.03 |
| 10 | Japan | 0.22 | Philippines | 0.41 | Mexico | 1.38 | Israel | 3.94 | Australia | 2.68 | Argentina | 2.33 | UK | 6.07 | US | 3.10 |
| 11 | Philippines | 0.22 | Japan | 0.42 | China | 1.46 | Tanzania | 4.04 | Kenya | 2.64 | Spain | 2.36 | Tanzania | 5.67 | Nigeria | 3.15 |
| 12 | Egypt | 0.22 | Egypt | 0.42 | Argentina | 1.51 | Philippines | 4.21 | US | 2.58 | UK | 2.37 | Japan | 5.55 | South Africa | 3.25 |
| 13 | Israel | 0.23 | Mexico | 0.42 | Hong Kong | 1.66 | India | 4.25 | UK | 2.55 | Brazil | 2.43 | Philippines | 5.38 | Spain | 3.25 |
| 14 | Mexico | 0.23 | Israel | 0.42 | Brazil | 1.96 | Sweden | 4.61 | Mexico | 2.45 | South Africa | 2.45 | Egypt | 5.26 | Philippines | 3.30 |
| 15 | South Africa | 0.24 | South Africa | 0.43 | Poland | 2.01 | Turkey | 5.19 | Germany | 2.38 | Japan | 2.45 | South Africa | 5.22 | Indonesia | 3.40 |
| 16 | China | 0.27 | Germany | 0.44 | South Africa | 2.44 | Brazil | 5.67 | South Africa | 2.34 | Mexico | 2.54 | Nigeria | 5.00 | Egypt | 3.44 |
| 17 | Germany | 0.27 | China | 0.44 | US | 2.69 | US | 5.84 | Hong Kong | 2.24 | Nigeria | 2.59 | Mexico | 4.88 | Turkey | 3.54 |
| 18 | Poland | 0.30 | Poland | 0.46 | Sweden | 2.88 | South Africa | 6.07 | Brazil | 2.16 | Kenya | 2.70 | Kenya | 4.76 | Mexico | 3.65 |
| 19 | Hong Kong | 0.31 | Hong Kong | 0.46 | Japan | 3.13 | Japan | 7.23 | Japan | 2.04 | Tanzania | 2.73 | Spain | 4.70 | Argentina | 3.66 |
| 20 | Spain | 0.32 | Spain | 0.47 | Spain | 3.47 | Spain | 7.40 | Argentina | 1.96 | Indonesia | 2.76 | Turkey | 4.65 | Tanzania | 3.71 |
| 21 | Argentina | 0.33 | Argentina | 0.47 | Germany | 3.89 | Australia | 8.31 | Poland | 1.39 | Turkey | 2.79 | India | 4.11 | Brazil | 3.79 |
| 22 | Indonesia | 0.38 | Indonesia | 0.49 | UK | 4.13 | UK | 8.43 | Israel | 1.29 | Philippines | 2.84 | Brazil | 4.02 | Kenya | 3.80 |
| 23 | Turkey | 0.53 | Turkey | 0.50 | Australia | 4.61 | Germany | 8.95 | Egypt | 0.70 | India | 3.19 | Argentina | 3.95 | India | 4.08 |
| Meta-analytic mean and heterogeneity | | | | | | | | | | | | | | | | |
| Estimate | 0.22 | | | | 1.85 | | | | 2.46 | | | | 5.64 | | | |
| 95% CI | (0.17,0.27) | | | | (1.30,2.40) | | | | (2.18,2.74) | | | | (5.22,6.07) | | | |
| Heterogeneity (tau) | 0.12 | | | | 1.34 | | | | 0.68 | | | | 1.04 | | | |
| Mean within country SD | 0.39 | | | | 5.23 | | | | 2.41 | | | | 3.24 | | | |
| ICC | 0.08 | | | | 0.06 | | | | 0.07 | | | | 0.09 | | | |
| Variability index | 0.5 | | | | 0.53 | | | | 0.33 | | | | 0.42 | | | |

|  | Socioeconomic  outcomes | | | | | | | | | | | | | | | |
| --- | --- | --- | --- | --- | --- | --- | --- | --- | --- | --- | --- | --- | --- | --- | --- | --- |
|  | **Material security** | | | | **Educational attainment**  **(16+ years)** | | | | **Currently**  **employed** | | | | **Financially comfortable**  **/ getting by** | | | |
| Rank | **Country** | **Mean** | **Country** | **St dev** | **Country** | **Mean** | **Country** | **St dev** | **Country** | **Mean** | **Country** | **St dev** | **Country** | **Mean** | **Country** | **St dev** |
| 1 | Sweden | 7.50 | China | 2.33 | Israel | 0.52 | Tanzania | 0.12 | Hong Kong | 0.77 | Hong Kong | 0.42 | Sweden | 0.95 | Sweden | 0.23 |
| 2 | Poland | 7.33 | Hong Kong | 2.38 | UK | 0.37 | Nigeria | 0.14 | Nigeria | 0.67 | Nigeria | 0.47 | Australia | 0.84 | Australia | 0.37 |
| 3 | Australia | 7.28 | Poland | 2.38 | Australia | 0.35 | Indonesia | 0.24 | China | 0.64 | China | 0.48 | Hong Kong | 0.82 | Hong Kong | 0.39 |
| 4 | Israel | 7.24 | Israel | 2.53 | US | 0.33 | India | 0.24 | Poland | 0.63 | Poland | 0.48 | US | 0.81 | US | 0.40 |
| 5 | China | 7.02 | Sweden | 2.57 | Germany | 0.33 | Kenya | 0.25 | Argentina | 0.62 | South Africa | 0.48 | China | 0.80 | China | 0.40 |
| 6 | US | 7.02 | Japan | 2.66 | Poland | 0.29 | South Africa | 0.25 | Israel | 0.61 | Argentina | 0.48 | Indonesia | 0.80 | Indonesia | 0.40 |
| 7 | Hong Kong | 6.94 | Australia | 2.78 | Sweden | 0.27 | Philippines | 0.26 | UK | 0.61 | Japan | 0.49 | Poland | 0.79 | Poland | 0.41 |
| 8 | Germany | 6.80 | Germany | 2.78 | Japan | 0.25 | Argentina | 0.29 | Sweden | 0.61 | Sweden | 0.49 | Japan | 0.79 | Germany | 0.41 |
| 9 | UK | 6.60 | UK | 2.85 | Mexico | 0.23 | China | 0.30 | Japan | 0.61 | UK | 0.49 | Germany | 0.79 | Japan | 0.41 |
| 10 | Indonesia | 6.46 | US | 2.93 | Turkey | 0.22 | Egypt | 0.34 | US | 0.60 | Israel | 0.49 | UK | 0.77 | UK | 0.42 |
| 11 | Egypt | 6.22 | Nigeria | 3.20 | Spain | 0.21 | Brazil | 0.39 | Germany | 0.60 | US | 0.49 | Israel | 0.75 | Israel | 0.43 |
| 12 | Philippines | 6.00 | Spain | 3.27 | Hong Kong | 0.18 | Hong Kong | 0.39 | Australia | 0.59 | Germany | 0.49 | Spain | 0.63 | Kenya | 0.44 |
| 13 | Japan | 5.86 | Philippines | 3.27 | Brazil | 0.18 | Spain | 0.41 | Tanzania | 0.57 | Australia | 0.49 | Brazil | 0.61 | Spain | 0.48 |
| 14 | Tanzania | 5.85 | South Africa | 3.41 | Egypt | 0.14 | Turkey | 0.42 | Spain | 0.55 | Tanzania | 0.50 | Egypt | 0.58 | Brazil | 0.49 |
| 15 | South Africa | 5.55 | Egypt | 3.43 | China | 0.10 | Mexico | 0.42 | Mexico | 0.53 | Kenya | 0.50 | Turkey | 0.52 | Nigeria | 0.49 |
| 16 | Turkey | 5.28 | Indonesia | 3.44 | Argentina | 0.09 | Japan | 0.43 | Philippines | 0.52 | Egypt | 0.50 | Tanzania | 0.50 | Egypt | 0.49 |
| 17 | Nigeria | 5.24 | Turkey | 3.60 | Philippines | 0.07 | Sweden | 0.44 | Brazil | 0.51 | Spain | 0.50 | Mexico | 0.50 | Argentina | 0.50 |
| 18 | Spain | 4.98 | Argentina | 3.73 | South Africa | 0.07 | Poland | 0.45 | Indonesia | 0.50 | Turkey | 0.50 | India | 0.50 | India | 0.50 |
| 19 | Kenya | 4.94 | Tanzania | 3.73 | Kenya | 0.07 | Germany | 0.47 | India | 0.48 | India | 0.50 | Philippines | 0.49 | Mexico | 0.50 |
| 20 | Mexico | 4.84 | Mexico | 3.78 | Indonesia | 0.06 | US | 0.47 | Egypt | 0.46 | Mexico | 0.50 | South Africa | 0.49 | Philippines | 0.50 |
| 21 | India | 3.98 | Kenya | 3.84 | India | 0.06 | Australia | 0.48 | Turkey | 0.45 | Brazil | 0.50 | Argentina | 0.48 | South Africa | 0.50 |
| 22 | Brazil | 3.91 | Brazil | 3.88 | Nigeria | 0.02 | UK | 0.48 | Kenya | 0.45 | Indonesia | 0.50 | Nigeria | 0.39 | Tanzania | 0.50 |
| 23 | Argentina | 3.79 | India | 4.13 | Tanzania | 0.01 | Israel | 0.50 | South Africa | 0.37 | Philippines | 0.50 | Kenya | 0.26 | Turkey | 0.50 |
| Meta-analytic mean and heterogeneity | | | | | | | | | | | | | | | | |
| Estimate | 5.94 | | | | 0.19 | | | | 0.56 | | | | 0.65 | | | |
| 95% CI | (5.47,6.41) | | | | (0.14,0.25) | | | | (0.53,0.60) | | | | (0.57,0.72) | | | |
| Heterogeneity (tau) | 1.16 | | | | 0.13 | | | | 0.09 | | | | 0.18 | | | |
| Mean within country SD | 3.21 | | | | 0.37 | | | | 0.49 | | | | 0.45 | | | |
| ICC | 0.11 | | | | 0.11 | | | | 0.03 | | | | 0.14 | | | |
| Variability index | 0.43 | | | | 0.51 | | | | 0.48 | | | | 0.59 | | | |

|  | Socioeconomic outcomes | | | | Religion and spirituality | | | | | | | | | | | |
| --- | --- | --- | --- | --- | --- | --- | --- | --- | --- | --- | --- | --- | --- | --- | --- | --- |
|  | **Own home** | | | | **Religious/spiritual**  **connection** | | | | **Belief in life**  **after death** | | | | **Transformative**  **religious experience** | | | |
| Rank | **Country** | **Mean** | **Country** | **St dev** | **Country** | **Mean** | **Country** | **St dev** | **Country** | **Mean** | **Country** | **St dev** | **Country** | **Mean** | **Country** | **St dev** |
| 1 | China | 0.84 | China | 0.37 | Egypt | 0.91 | Egypt | 0.29 | Indonesia | 0.95 | Indonesia | 0.22 | Tanzania | 0.69 | Japan | 0.27 |
| 2 | India | 0.82 | India | 0.38 | Nigeria | 0.89 | Nigeria | 0.31 | Nigeria | 0.73 | Japan | 0.40 | Kenya | 0.65 | Poland | 0.28 |
| 3 | Poland | 0.75 | Poland | 0.43 | Indonesia | 0.87 | Indonesia | 0.33 | Kenya | 0.72 | China | 0.43 | Philippines | 0.62 | Sweden | 0.34 |
| 4 | Egypt | 0.74 | Egypt | 0.44 | South Africa | 0.85 | South Africa | 0.36 | Turkey | 0.67 | Nigeria | 0.44 | Nigeria | 0.60 | Spain | 0.41 |
| 5 | Tanzania | 0.72 | Tanzania | 0.45 | Tanzania | 0.81 | Tanzania | 0.39 | Egypt | 0.64 | Kenya | 0.45 | Brazil | 0.60 | Germany | 0.41 |
| 6 | South Africa | 0.72 | South Africa | 0.45 | Kenya | 0.81 | Kenya | 0.40 | Tanzania | 0.61 | Sweden | 0.46 | South Africa | 0.60 | UK | 0.41 |
| 7 | Sweden | 0.71 | US | 0.45 | Brazil | 0.77 | Brazil | 0.42 | Brazil | 0.61 | Turkey | 0.47 | India | 0.58 | China | 0.42 |
| 8 | US | 0.71 | Sweden | 0.46 | India | 0.72 | Japan | 0.42 | Mexico | 0.60 | Germany | 0.48 | Indonesia | 0.55 | Israel | 0.42 |
| 9 | Australia | 0.69 | Australia | 0.46 | Mexico | 0.67 | China | 0.42 | Argentina | 0.58 | Egypt | 0.48 | Mexico | 0.45 | Australia | 0.43 |
| 10 | Hong Kong | 0.67 | Israel | 0.47 | Turkey | 0.65 | Sweden | 0.44 | Poland | 0.57 | Australia | 0.48 | Hong Kong | 0.42 | Turkey | 0.46 |
| 11 | Israel | 0.67 | Hong Kong | 0.47 | Philippines | 0.64 | India | 0.45 | US | 0.56 | Brazil | 0.49 | Argentina | 0.40 | Tanzania | 0.46 |
| 12 | Indonesia | 0.66 | Indonesia | 0.47 | Israel | 0.63 | Mexico | 0.47 | Israel | 0.55 | Tanzania | 0.49 | US | 0.36 | Egypt | 0.48 |
| 13 | UK | 0.63 | UK | 0.48 | Argentina | 0.60 | Turkey | 0.48 | Philippines | 0.54 | UK | 0.49 | Egypt | 0.35 | Kenya | 0.48 |
| 14 | Philippines | 0.62 | Philippines | 0.49 | US | 0.58 | Philippines | 0.48 | South Africa | 0.53 | Mexico | 0.49 | Turkey | 0.29 | US | 0.48 |
| 15 | Spain | 0.61 | Mexico | 0.49 | Poland | 0.56 | Australia | 0.48 | India | 0.48 | Spain | 0.49 | Australia | 0.25 | Philippines | 0.49 |
| 16 | Mexico | 0.61 | Spain | 0.49 | Hong Kong | 0.46 | Germany | 0.48 | Hong Kong | 0.45 | Argentina | 0.49 | Israel | 0.23 | Argentina | 0.49 |
| 17 | Brazil | 0.59 | Brazil | 0.49 | Spain | 0.43 | Israel | 0.48 | Spain | 0.40 | Poland | 0.50 | China | 0.23 | Nigeria | 0.49 |
| 18 | Argentina | 0.59 | Argentina | 0.49 | UK | 0.41 | Argentina | 0.49 | UK | 0.39 | US | 0.50 | UK | 0.22 | South Africa | 0.49 |
| 19 | Turkey | 0.57 | Turkey | 0.50 | Australia | 0.37 | UK | 0.49 | Australia | 0.36 | Hong Kong | 0.50 | Spain | 0.21 | Brazil | 0.49 |
| 20 | Japan | 0.56 | Japan | 0.50 | Germany | 0.37 | US | 0.49 | Germany | 0.34 | Israel | 0.50 | Germany | 0.21 | Hong Kong | 0.49 |
| 21 | Kenya | 0.55 | Kenya | 0.50 | Sweden | 0.26 | Spain | 0.50 | Sweden | 0.29 | Philippines | 0.50 | Sweden | 0.13 | India | 0.49 |
| 22 | Germany | 0.49 | Germany | 0.50 | China | 0.23 | Poland | 0.50 | China | 0.24 | South Africa | 0.50 | Poland | 0.08 | Mexico | 0.50 |
| 23 | Nigeria | 0.49 | Nigeria | 0.50 | Japan | 0.91 | Hong Kong | 0.50 | Japan | 0.21 | India | 0.50 | Japan | 0.08 | Indonesia | 0.50 |
| Meta-analytic mean and heterogeneity | | | | | | | | | | | | | | | | |
| Estimate | 0.65 | | | | 0.60 | | | | 0.52 | | | | 0.38 | | | |
| 95% CI | (0.61,0.69) | | | | (0.51,0.69) | | | | (0.45,0.59) | | | | (0.30,0.46) | | | |
| Heterogeneity (tau) | 0.09 | | | | 0.22 | | | | 0.17 | | | | 0.2 | | | |
| Mean within country SD | 0.47 | | | | 0.44 | | | | 0.47 | | | | 0.45 | | | |
| ICC | 0.04 | | | | 0.2 | | | | 0.12 | | | | 0.16 | | | |
| Variability index | 0.49 | | | | 0.63 | | | | 0.6 | | | | 0.61 | | | |

|  | Religion and spirituality | | | | | | | | | | | | | | | |
| --- | --- | --- | --- | --- | --- | --- | --- | --- | --- | --- | --- | --- | --- | --- | --- | --- |
|  | **Religious reading**  **or listening** | | | | **Prayer or**  **meditation** | | | | **Belief in God/**  **gods/spiritual forces** | | | | **Religious**  **centrality** | | | |
| Rank | **Country** | **Mean** | **Country** | **St dev** | **Country** | **Mean** | **Country** | **St dev** | **Country** | **Mean** | **Country** | **St dev** | **Country** | **Mean** | **Country** | **St dev** |
| 1 | Tanzania | 0.70 | Japan | 0.19 | Nigeria | 0.92 | Nigeria | 0.28 | Egypt | 1.00 | Egypt | 0.02 | Indonesia | 0.94 | Indonesia | 0.24 |
| 2 | Kenya | 0.65 | Sweden | 0.21 | Kenya | 0.84 | China | 0.29 | Nigeria | 0.99 | Nigeria | 0.07 | Tanzania | 0.91 | Japan | 0.26 |
| 3 | Nigeria | 0.63 | China | 0.24 | Indonesia | 0.84 | Japan | 0.30 | Tanzania | 0.98 | Kenya | 0.12 | Egypt | 0.90 | Tanzania | 0.29 |
| 4 | Indonesia | 0.59 | Germany | 0.26 | Egypt | 0.80 | Sweden | 0.32 | Kenya | 0.98 | Tanzania | 0.13 | Nigeria | 0.89 | Egypt | 0.30 |
| 5 | Egypt | 0.58 | Poland | 0.27 | Tanzania | 0.76 | Indonesia | 0.36 | Indonesia | 0.97 | Indonesia | 0.17 | India | 0.86 | Nigeria | 0.31 |
| 6 | Brazil | 0.39 | Australia | 0.31 | South Africa | 0.71 | Kenya | 0.36 | Brazil | 0.96 | Brazil | 0.20 | Kenya | 0.81 | Sweden | 0.33 |
| 7 | Turkey | 0.38 | Spain | 0.32 | Philippines | 0.71 | Germany | 0.38 | South Africa | 0.96 | South Africa | 0.20 | South Africa | 0.78 | China | 0.34 |
| 8 | India | 0.36 | UK | 0.34 | Turkey | 0.69 | Egypt | 0.40 | India | 0.95 | India | 0.21 | Philippines | 0.74 | India | 0.35 |
| 9 | South Africa | 0.35 | Argentina | 0.40 | Brazil | 0.65 | Australia | 0.41 | Philippines | 0.93 | Philippines | 0.26 | Turkey | 0.71 | Germany | 0.38 |
| 10 | Israel | 0.29 | US | 0.41 | India | 0.65 | UK | 0.43 | Mexico | 0.91 | Mexico | 0.28 | Brazil | 0.65 | Kenya | 0.39 |
| 11 | Philippines | 0.26 | Mexico | 0.42 | Mexico | 0.48 | Tanzania | 0.43 | Turkey | 0.85 | Turkey | 0.35 | Mexico | 0.55 | South Africa | 0.41 |
| 12 | Hong Kong | 0.26 | Philippines | 0.44 | US | 0.42 | Spain | 0.44 | Argentina | 0.84 | Argentina | 0.36 | Argentina | 0.46 | Australia | 0.44 |
| 13 | Mexico | 0.23 | Hong Kong | 0.44 | Israel | 0.37 | Poland | 0.45 | Poland | 0.83 | Poland | 0.38 | Israel | 0.46 | Philippines | 0.44 |
| 14 | US | 0.21 | Israel | 0.46 | Argentina | 0.37 | Philippines | 0.45 | US | 0.73 | Japan | 0.40 | Poland | 0.44 | Spain | 0.44 |
| 15 | Argentina | 0.20 | Tanzania | 0.46 | Hong Kong | 0.30 | South Africa | 0.45 | Israel | 0.72 | US | 0.45 | US | 0.44 | UK | 0.45 |
| 16 | UK | 0.13 | South Africa | 0.48 | Poland | 0.28 | Hong Kong | 0.46 | Spain | 0.64 | Israel | 0.45 | Hong Kong | 0.32 | Turkey | 0.45 |
| 17 | Spain | 0.12 | Kenya | 0.48 | Spain | 0.26 | Turkey | 0.46 | Hong Kong | 0.59 | China | 0.47 | UK | 0.28 | Hong Kong | 0.47 |
| 18 | Australia | 0.10 | India | 0.48 | UK | 0.24 | India | 0.48 | Germany | 0.55 | Spain | 0.48 | Spain | 0.27 | Brazil | 0.48 |
| 19 | Poland | 0.08 | Nigeria | 0.48 | Australia | 0.21 | Brazil | 0.48 | Australia | 0.54 | Hong Kong | 0.49 | Australia | 0.26 | Poland | 0.50 |
| 20 | Germany | 0.07 | Turkey | 0.49 | Germany | 0.17 | Israel | 0.48 | UK | 0.54 | Sweden | 0.50 | Germany | 0.18 | US | 0.50 |
| 21 | China | 0.06 | Brazil | 0.49 | Sweden | 0.11 | Argentina | 0.48 | Sweden | 0.44 | Germany | 0.50 | Sweden | 0.13 | Mexico | 0.50 |
| 22 | Sweden | 0.05 | Indonesia | 0.49 | Japan | 0.10 | US | 0.49 | China | 0.34 | UK | 0.50 | China | 0.13 | Argentina | 0.50 |
| 23 | Japan | 0.04 | Egypt | 0.49 | China | 0.09 | Mexico | 0.50 | Japan | 0.20 | Australia | 0.50 | Japan | 0.07 | Israel | 0.50 |
| Meta-analytic mean and heterogeneity | | | | | | | | | | | | | | | | |
| Estimate | 0.29 | | | | 0.48 | | | | 0.76 | | | | 0.53 | | | |
| 95% CI | (0.21,0.38) | | | | (0.37,0.59) | | | | (0.66,0.85) | | | | (0.41,0.65) | | | |
| Heterogeneity (tau) | 0.21 | | | | 0.27 | | | | 0.24 | | | | 0.29 | | | |
| Mean within country SD | 0.41 | | | | 0.42 | | | | 0.36 | | | | 0.41 | | | |
| ICC | 0.21 | | | | 0.29 | | | | 0.3 | | | | 0.33 | | | |
| Variability index | 0.61 | | | | 0.67 | | | | 0.61 | | | | 0.68 | | | |

|  | Religion and spirituality | | | | | | | | | | | | | | | |
| --- | --- | --- | --- | --- | --- | --- | --- | --- | --- | --- | --- | --- | --- | --- | --- | --- |
|  | **Religious/spiritual**  **comfort** | | | | **Feel loved**  **by God** | | | | **Feel punished**  **by God** | | | | **Experienced**  **religious criticism** | | | |
| Rank | **Country** | **Mean** | **Country** | **St dev** | **Country** | **Mean** | **Country** | **St dev** | **Country** | **Mean** | **Country** | **St dev** | **Country** | **Mean** | **Country** | **St dev** |
| 1 | Egypt | 0.98 | Egypt | 0.15 | Egypt | 0.98 | Egypt | 0.13 | Japan | 0.03 | Japan | 0.16 | Japan | 0.01 | Japan | 0.11 |
| 2 | Indonesia | 0.96 | Indonesia | 0.19 | Tanzania | 0.97 | Tanzania | 0.16 | Australia | 0.04 | Australia | 0.20 | Sweden | 0.02 | Sweden | 0.15 |
| 3 | Tanzania | 0.95 | Tanzania | 0.22 | Nigeria | 0.95 | Nigeria | 0.23 | Sweden | 0.04 | Sweden | 0.20 | Germany | 0.04 | Germany | 0.20 |
| 4 | Nigeria | 0.94 | Nigeria | 0.25 | Kenya | 0.93 | Kenya | 0.26 | Germany | 0.07 | Germany | 0.25 | Australia | 0.05 | Australia | 0.21 |
| 5 | India | 0.89 | Japan | 0.26 | South Africa | 0.92 | South Africa | 0.28 | China | 0.08 | China | 0.27 | China | 0.05 | China | 0.21 |
| 6 | Kenya | 0.88 | India | 0.32 | Indonesia | 0.91 | Indonesia | 0.29 | US | 0.09 | US | 0.28 | Spain | 0.06 | Spain | 0.24 |
| 7 | South Africa | 0.87 | Kenya | 0.33 | India | 0.91 | Philippines | 0.29 | Spain | 0.09 | Spain | 0.29 | US | 0.08 | US | 0.27 |
| 8 | Philippines | 0.80 | South Africa | 0.33 | Philippines | 0.91 | India | 0.29 | UK | 0.10 | UK | 0.30 | UK | 0.08 | UK | 0.27 |
| 9 | Brazil | 0.79 | China | 0.36 | Brazil | 0.87 | Japan | 0.31 | Argentina | 0.14 | Egypt | 0.33 | Israel | 0.11 | Israel | 0.31 |
| 10 | Turkey | 0.77 | Philippines | 0.40 | Mexico | 0.78 | Brazil | 0.33 | Mexico | 0.15 | Argentina | 0.35 | Poland | 0.13 | Poland | 0.33 |
| 11 | Mexico | 0.67 | Brazil | 0.41 | Turkey | 0.76 | China | 0.34 | Poland | 0.17 | Mexico | 0.36 | Argentina | 0.15 | Argentina | 0.35 |
| 12 | Israel | 0.60 | Sweden | 0.41 | Argentina | 0.68 | Sweden | 0.39 | Brazil | 0.18 | Poland | 0.38 | Brazil | 0.17 | Hong Kong | 0.38 |
| 13 | Argentina | 0.58 | Turkey | 0.42 | Israel | 0.58 | Mexico | 0.41 | Israel | 0.20 | Brazil | 0.39 | Hong Kong | 0.17 | Brazil | 0.38 |
| 14 | US | 0.57 | Germany | 0.44 | US | 0.55 | Turkey | 0.43 | Hong Kong | 0.22 | Israel | 0.40 | Indonesia | 0.18 | Indonesia | 0.38 |
| 15 | Poland | 0.48 | Australia | 0.47 | Poland | 0.48 | Germany | 0.44 | Nigeria | 0.26 | Hong Kong | 0.41 | Mexico | 0.23 | Mexico | 0.42 |
| 16 | Spain | 0.37 | Mexico | 0.47 | Spain | 0.36 | Australia | 0.46 | Indonesia | 0.28 | Nigeria | 0.44 | Egypt | 0.28 | Egypt | 0.45 |
| 17 | Hong Kong | 0.36 | UK | 0.47 | UK | 0.32 | Hong Kong | 0.46 | Turkey | 0.31 | Indonesia | 0.45 | Philippines | 0.34 | Philippines | 0.47 |
| 18 | UK | 0.34 | Hong Kong | 0.48 | Hong Kong | 0.31 | UK | 0.47 | Tanzania | 0.35 | Turkey | 0.46 | Turkey | 0.37 | Turkey | 0.48 |
| 19 | Australia | 0.33 | Spain | 0.48 | Australia | 0.29 | Argentina | 0.47 | South Africa | 0.41 | Tanzania | 0.48 | South Africa | 0.39 | India | 0.49 |
| 20 | Germany | 0.27 | Israel | 0.49 | Germany | 0.27 | Spain | 0.48 | Kenya | 0.43 | India | 0.48 | Tanzania | 0.46 | South Africa | 0.49 |
| 21 | Sweden | 0.22 | Argentina | 0.49 | Sweden | 0.18 | Israel | 0.49 | Philippines | 0.45 | South Africa | 0.49 | Nigeria | 0.49 | Tanzania | 0.50 |
| 22 | China | 0.16 | US | 0.50 | China | 0.14 | US | 0.50 | India | 0.63 | Kenya | 0.50 | Kenya | 0.52 | Kenya | 0.50 |
| 23 | Japan | 0.07 | Poland | 0.50 | Japan | 0.11 | Poland | 0.50 | Egypt | 0.88 | Philippines | 0.50 | India | 0.62 | Nigeria | 0.50 |
| Meta-analytic mean and heterogeneity | | | | | | | | | | | | | | | | |
| Estimate | 0.60 | | | | 0.62 | | | | 0.24 | | | | 0.22 | | | |
| 95% CI | (0.48,0.72) | | | | (0.49,0.74) | | | | (0.16,0.33) | | | | (0.14,0.29) | | | |
| Heterogeneity (tau) | 0.29 | | | | 0.31 | | | | 0.21 | | | | 0.18 | | | |
| Mean within country SD | 0.4 | | | | 0.38 | | | | 0.38 | | | | 0.37 | | | |
| ICC | 0.35 | | | | 0.4 | | | | 0.24 | | | | 0.19 | | | |
| Variability index | 0.67 | | | | 0.68 | | | | 0.59 | | | | 0.56 | | | |

|  |
| --- |
|  | **Religion and spirituality** | | | |
|  | **Faith-sharing** | | | |
| Rank | **Country** | **Mean** | **Country** | **St dev** |
| 1 | Tanzania | 0.83 | Japan | 0.19 |
| 2 | Kenya | 0.81 | China | 0.32 |
| 3 | Nigeria | 0.76 | Tanzania | 0.37 |
| 4 | South Africa | 0.72 | Kenya | 0.39 |
| 5 | India | 0.70 | Sweden | 0.39 |
| 6 | Brazil | 0.62 | Germany | 0.41 |
| 7 | Turkey | 0.60 | Australia | 0.42 |
| 8 | Philippines | 0.56 | UK | 0.42 |
| 9 | Indonesia | 0.55 | Nigeria | 0.42 |
| 10 | Argentina | 0.50 | Spain | 0.44 |
| 11 | Israel | 0.47 | South Africa | 0.45 |
| 12 | Mexico | 0.47 | India | 0.46 |
| 13 | Egypt | 0.41 | Poland | 0.46 |
| 14 | US | 0.37 | Hong Kong | 0.47 |
| 15 | Hong Kong | 0.32 | US | 0.48 |
| 16 | Poland | 0.30 | Brazil | 0.49 |
| 17 | Spain | 0.26 | Turkey | 0.49 |
| 18 | Australia | 0.23 | Egypt | 0.49 |
| 19 | UK | 0.23 | Philippines | 0.50 |
| 20 | Germany | 0.21 | Indonesia | 0.50 |
| 21 | Sweden | 0.19 | Israel | 0.50 |
| 22 | China | 0.12 | Mexico | 0.50 |
| 23 | Japan | 0.04 | Argentina | 0.50 |
| Meta-analytic mean and heterogeneity | | | | |
| Estimate | 0.45 | | | |
| 95% CI | (0.35,0.54) | | | |
| Heterogeneity (tau) | 0.23 | | | |
| Mean within country SD | 0.44 | | | |
| ICC | 0.21 | | | |
| Variability index | 0.65 | | | |

## Supplementary Table 3. Mean and standard deviation of all GFS outcomes – GFS countries ordered alphabetically

|  | Overall flourishing | | | | | | | | | | | | | | | |
| --- | --- | --- | --- | --- | --- | --- | --- | --- | --- | --- | --- | --- | --- | --- | --- | --- |
|  | **Secure Flourishing Index** | | | | **Flourishing Index** | | | | **Happiness &**  **life satisfaction** | | | | **Physical &**  **mental health** | | | |
| Country | **Mean** | **Rank** | **St dev** | **Rank** | **Mean** | **Rank** | **St dev** | **Rank** | **Mean** | **Rank** | **St dev** | **Rank** | **Mean** | **Rank** | **St dev** | **Rank** |
| Argentina | 7.14 | 10 | 1.46 | 9 | 7.79 | 6 | 1.49 | 11 | 7.29 | 6 | 2.09 | 12 | 7.57 | 11 | 1.86 | 10 |
| Australia | 7.01 | 17 | 1.61 | 14 | 7.02 | 20 | 1.59 | 14 | 6.80 | 15 | 1.87 | 4 | 6.65 | 20 | 1.88 | 12 |
| Brazil | 7.02 | 16 | 1.67 | 17 | 7.63 | 10 | 1.72 | 18 | 7.24 | 7 | 2.23 | 16 | 7.28 | 13 | 2.13 | 19 |
| China | 7.13 | 11 | 1.46 | 10 | 7.17 | 16 | 1.49 | 10 | 7.02 | 10 | 1.65 | 2 | 7.38 | 12 | 1.66 | 2 |
| Egypt | 7.32 | 7 | 1.50 | 11 | 7.63 | 9 | 1.46 | 9 | 6.93 | 11 | 2.44 | 19 | 7.71 | 10 | 1.97 | 15 |
| Germany | 7.01 | 18 | 1.37 | 4 | 7.11 | 18 | 1.36 | 5 | 6.92 | 13 | 1.91 | 5 | 6.84 | 18 | 1.93 | 14 |
| Hong Kong | 7.12 | 12 | 1.75 | 19 | 7.17 | 17 | 1.75 | 19 | 7.10 | 8 | 1.96 | 9 | 7.15 | 15 | 1.93 | 13 |
| India | 6.87 | 20 | 1.89 | 22 | 7.43 | 12 | 2.02 | 23 | 6.74 | 17 | 3.12 | 23 | 7.22 | 14 | 2.95 | 23 |
| Indonesia | 8.10 | 1 | 1.35 | 2 | 8.47 | 1 | 1.34 | 3 | 8.02 | 1 | 1.99 | 10 | 8.43 | 2 | 1.71 | 5 |
| Israel | 7.87 | 2 | 1.36 | 3 | 8.00 | 4 | 1.34 | 2 | 7.62 | 3 | 1.65 | 3 | 8.27 | 5 | 1.65 | 1 |
| Japan | 5.89 | 23 | 1.79 | 20 | 5.93 | 23 | 1.78 | 20 | 6.14 | 21 | 2.15 | 15 | 6.09 | 23 | 2.01 | 16 |
| Kenya | 7.28 | 8 | 1.61 | 15 | 7.77 | 7 | 1.61 | 15 | 6.62 | 19 | 2.67 | 20 | 8.39 | 3 | 2.06 | 17 |
| Mexico | 7.64 | 4 | 1.37 | 5 | 8.19 | 2 | 1.35 | 4 | 7.82 | 2 | 1.93 | 6 | 8.07 | 6 | 1.66 | 3 |
| Nigeria | 7.37 | 6 | 1.39 | 6 | 7.83 | 5 | 1.45 | 8 | 6.79 | 16 | 2.36 | 17 | 8.46 | 1 | 1.85 | 8 |
| Philippines | 7.71 | 3 | 1.42 | 8 | 8.11 | 3 | 1.44 | 7 | 7.41 | 5 | 2.12 | 14 | 7.87 | 8 | 1.83 | 6 |
| Poland | 7.55 | 5 | 1.30 | 1 | 7.63 | 8 | 1.29 | 1 | 7.54 | 4 | 1.56 | 1 | 7.87 | 7 | 1.68 | 4 |
| South Africa | 7.07 | 15 | 1.55 | 13 | 7.41 | 13 | 1.58 | 13 | 6.66 | 18 | 2.38 | 18 | 7.85 | 9 | 2.23 | 21 |
| Spain | 6.90 | 19 | 1.39 | 7 | 7.31 | 14 | 1.42 | 6 | 6.85 | 14 | 1.99 | 11 | 7.15 | 16 | 1.88 | 11 |
| Sweden | 7.10 | 14 | 1.54 | 12 | 7.04 | 19 | 1.57 | 12 | 7.06 | 9 | 1.95 | 7 | 6.80 | 19 | 1.85 | 9 |
| Tanzania | 7.19 | 9 | 1.82 | 21 | 7.48 | 11 | 1.81 | 21 | 5.96 | 22 | 2.99 | 22 | 8.38 | 4 | 2.16 | 20 |
| Turkey | 6.32 | 22 | 1.96 | 23 | 6.59 | 22 | 1.93 | 22 | 5.36 | 23 | 2.89 | 21 | 6.49 | 22 | 2.50 | 22 |
| United Kingdom | 6.79 | 21 | 1.68 | 18 | 6.88 | 21 | 1.69 | 17 | 6.60 | 20 | 2.10 | 13 | 6.59 | 21 | 2.09 | 18 |
| United States | 7.11 | 13 | 1.66 | 16 | 7.18 | 15 | 1.65 | 16 | 6.93 | 12 | 1.95 | 8 | 7.00 | 17 | 1.83 | 7 |

|  | Overall flourishing | | | | | | | | | | | | | | | |
| --- | --- | --- | --- | --- | --- | --- | --- | --- | --- | --- | --- | --- | --- | --- | --- | --- |
|  | **Meaning**  **& purpose** | | | | **Character**  **& virtue** | | | | **Close social**  **relationships** | | | | **Financial &**  **material security** | | | |
| Country | **Mean** | **Rank** | **St dev** | **Rank** | **Mean** | **Rank** | **St dev** | **Rank** | **Mean** | **Rank** | **St dev** | **Rank** | **Mean** | **Rank** | **St dev** | **Rank** |
| Argentina | 7.92 | 6 | 1.97 | 11 | 8.37 | 4 | 1.55 | 4 | 7.81 | 8 | 2.19 | 11 | 3.87 | 23 | 3.48 | 21 |
| Australia | 7.04 | 19 | 2.11 | 15 | 7.56 | 15 | 1.50 | 1 | 7.05 | 21 | 2.30 | 14 | 6.98 | 4 | 2.72 | 8 |
| Brazil | 7.83 | 9 | 2.11 | 16 | 8.34 | 5 | 1.74 | 13 | 7.46 | 12 | 2.58 | 20 | 3.97 | 22 | 3.59 | 22 |
| China | 7.25 | 16 | 1.69 | 5 | 7.00 | 22 | 1.73 | 12 | 7.17 | 18 | 1.91 | 5 | 6.95 | 5 | 2.17 | 1 |
| Egypt | 7.98 | 5 | 1.98 | 12 | 7.64 | 14 | 2.00 | 18 | 7.89 | 6 | 2.31 | 17 | 5.74 | 12 | 3.09 | 15 |
| Germany | 7.19 | 17 | 1.83 | 7 | 7.31 | 18 | 1.59 | 6 | 7.27 | 15 | 2.17 | 10 | 6.51 | 8 | 2.68 | 7 |
| Hong Kong | 7.26 | 15 | 1.91 | 9 | 7.21 | 21 | 1.80 | 16 | 7.12 | 20 | 2.00 | 7 | 6.87 | 6 | 2.36 | 4 |
| India | 7.48 | 12 | 2.60 | 22 | 7.78 | 11 | 2.49 | 23 | 7.94 | 4 | 2.72 | 22 | 4.05 | 21 | 3.66 | 23 |
| Indonesia | 8.70 | 1 | 1.51 | 1 | 8.49 | 1 | 1.66 | 10 | 8.68 | 1 | 1.65 | 1 | 6.27 | 10 | 3.09 | 16 |
| Israel | 8.26 | 3 | 1.67 | 4 | 7.95 | 8 | 1.63 | 9 | 7.91 | 5 | 1.97 | 6 | 7.20 | 2 | 2.35 | 3 |
| Japan | 5.83 | 23 | 2.09 | 14 | 5.64 | 23 | 1.77 | 15 | 5.96 | 23 | 2.21 | 12 | 5.70 | 13 | 2.67 | 6 |
| Kenya | 7.86 | 8 | 2.20 | 19 | 8.10 | 7 | 2.25 | 21 | 7.88 | 7 | 2.41 | 19 | 4.85 | 19 | 3.37 | 19 |
| Mexico | 8.43 | 2 | 1.67 | 2 | 8.44 | 3 | 1.52 | 2 | 8.20 | 3 | 1.89 | 4 | 4.86 | 18 | 3.48 | 20 |
| Nigeria | 7.89 | 7 | 1.90 | 8 | 8.27 | 6 | 1.83 | 17 | 7.72 | 9 | 2.15 | 9 | 5.12 | 16 | 2.86 | 10 |
| Philippines | 8.23 | 4 | 1.83 | 6 | 8.48 | 2 | 1.75 | 14 | 8.56 | 2 | 1.83 | 3 | 5.69 | 14 | 2.94 | 12 |
| Poland | 7.74 | 10 | 1.67 | 3 | 7.36 | 17 | 1.61 | 8 | 7.66 | 10 | 1.74 | 2 | 7.15 | 3 | 2.25 | 2 |
| South Africa | 7.39 | 13 | 2.08 | 13 | 7.75 | 12 | 2.02 | 19 | 7.40 | 14 | 2.30 | 15 | 5.38 | 15 | 3.00 | 13 |
| Spain | 7.32 | 14 | 1.91 | 10 | 7.80 | 10 | 1.53 | 3 | 7.41 | 13 | 2.04 | 8 | 4.84 | 20 | 3.02 | 14 |
| Sweden | 6.86 | 20 | 2.15 | 17 | 7.27 | 20 | 1.56 | 5 | 7.23 | 16 | 2.22 | 13 | 7.36 | 1 | 2.49 | 5 |
| Tanzania | 7.66 | 11 | 2.52 | 21 | 7.84 | 9 | 2.43 | 22 | 7.55 | 11 | 2.76 | 23 | 5.76 | 11 | 3.29 | 18 |
| Turkey | 6.66 | 22 | 2.62 | 23 | 7.43 | 16 | 2.15 | 20 | 6.99 | 22 | 2.64 | 21 | 4.97 | 17 | 3.29 | 17 |
| United Kingdom | 6.77 | 21 | 2.24 | 20 | 7.28 | 19 | 1.68 | 11 | 7.16 | 19 | 2.31 | 16 | 6.34 | 9 | 2.76 | 9 |
| United States | 7.15 | 18 | 2.18 | 18 | 7.66 | 13 | 1.60 | 7 | 7.18 | 17 | 2.31 | 18 | 6.75 | 7 | 2.87 | 11 |

|  | Psychological well-being | | | | | | | | | | | | | | | |
| --- | --- | --- | --- | --- | --- | --- | --- | --- | --- | --- | --- | --- | --- | --- | --- | --- |
|  | **Happiness** | | | | **Life satisfaction** | | | | **Current life**  **evaluation** | | | | **Future life**  **evaluation** | | | |
| Country | **Mean** | **Rank** | **St dev** | **Rank** | **Mean** | **Rank** | **St dev** | **Rank** | **Mean** | **Rank** | **St dev** | **Rank** | **Mean** | **Rank** | **St dev** | **Rank** |
| Argentina | 7.36 | 5 | 2.14 | 13 | 7.22 | 7 | 2.38 | 14 | 6.75 | 9 | 2.19 | 13 | 8.01 | 6 | 2.15 | 15 |
| Australia | 6.88 | 17 | 1.82 | 4 | 6.72 | 16 | 2.11 | 7 | 6.79 | 8 | 1.77 | 4 | 7.59 | 11 | 1.86 | 4 |
| Brazil | 7.33 | 7 | 2.30 | 15 | 7.15 | 8 | 2.48 | 16 | 6.59 | 12 | 2.28 | 14 | 8.65 | 1 | 1.87 | 6 |
| China | 6.99 | 13 | 1.70 | 3 | 7.05 | 10 | 1.81 | 2 | 6.34 | 15 | 1.76 | 2 | 7.36 | 15 | 1.71 | 1 |
| Egypt | 6.18 | 22 | 2.94 | 20 | 7.69 | 3 | 2.83 | 18 | 5.04 | 22 | 2.87 | 20 | 7.07 | 20 | 2.78 | 19 |
| Germany | 6.90 | 16 | 1.92 | 5 | 6.93 | 13 | 2.08 | 5 | 6.74 | 10 | 1.82 | 6 | 7.16 | 17 | 1.93 | 9 |
| Hong Kong | 7.16 | 9 | 2.00 | 8 | 7.03 | 11 | 2.08 | 6 | 6.85 | 7 | 2.02 | 10 | 7.10 | 19 | 1.97 | 10 |
| India | 6.48 | 20 | 3.56 | 23 | 7.00 | 12 | 3.47 | 21 | 5.62 | 19 | 3.58 | 23 | 7.29 | 16 | 3.07 | 23 |
| Indonesia | 8.04 | 1 | 2.20 | 14 | 7.99 | 1 | 2.29 | 11 | 6.97 | 5 | 2.52 | 16 | 8.37 | 2 | 2.05 | 11 |
| Israel | 7.76 | 3 | 1.65 | 2 | 7.47 | 6 | 2.00 | 3 | 7.33 | 1 | 1.81 | 5 | 8.08 | 5 | 1.86 | 5 |
| Japan | 6.22 | 21 | 2.13 | 12 | 6.06 | 20 | 2.31 | 13 | 5.92 | 17 | 2.14 | 12 | 6.02 | 23 | 2.25 | 17 |
| Kenya | 7.27 | 8 | 2.96 | 21 | 5.97 | 21 | 3.51 | 22 | 5.51 | 20 | 3.28 | 21 | 7.47 | 13 | 2.86 | 20 |
| Mexico | 7.79 | 2 | 2.03 | 10 | 7.85 | 2 | 2.14 | 8 | 7.10 | 4 | 2.12 | 11 | 8.28 | 3 | 2.08 | 12 |
| Nigeria | 7.06 | 10 | 2.59 | 17 | 6.51 | 17 | 2.86 | 19 | 5.73 | 18 | 2.79 | 18 | 8.25 | 4 | 2.08 | 13 |
| Philippines | 7.33 | 6 | 2.33 | 16 | 7.50 | 5 | 2.43 | 15 | 6.38 | 14 | 2.40 | 15 | 7.55 | 12 | 2.24 | 16 |
| Poland | 7.55 | 4 | 1.60 | 1 | 7.52 | 4 | 1.73 | 1 | 7.12 | 3 | 1.62 | 1 | 7.40 | 14 | 1.77 | 3 |
| South Africa | 6.95 | 14 | 2.65 | 18 | 6.36 | 19 | 2.81 | 17 | 6.11 | 16 | 2.84 | 19 | 7.61 | 10 | 2.46 | 18 |
| Spain | 6.92 | 15 | 2.00 | 9 | 6.79 | 15 | 2.18 | 10 | 6.67 | 11 | 1.93 | 8 | 7.61 | 9 | 1.90 | 7 |
| Sweden | 7.03 | 11 | 1.96 | 7 | 7.09 | 9 | 2.07 | 4 | 7.20 | 2 | 1.76 | 3 | 7.70 | 8 | 1.76 | 2 |
| Tanzania | 6.58 | 19 | 3.26 | 22 | 5.33 | 22 | 3.77 | 23 | 4.40 | 23 | 3.30 | 22 | 6.64 | 21 | 3.04 | 22 |
| Turkey | 5.54 | 23 | 2.93 | 19 | 5.19 | 23 | 3.24 | 20 | 5.18 | 21 | 2.56 | 17 | 6.15 | 22 | 2.98 | 21 |
| United Kingdom | 6.71 | 18 | 2.08 | 11 | 6.49 | 18 | 2.31 | 12 | 6.56 | 13 | 2.01 | 9 | 7.13 | 18 | 2.10 | 14 |
| United States | 7.01 | 12 | 1.92 | 6 | 6.86 | 14 | 2.14 | 9 | 6.94 | 6 | 1.85 | 7 | 7.73 | 7 | 1.93 | 8 |

|  | Psychological well-being | | | | | | | | | | | | | | | |
| --- | --- | --- | --- | --- | --- | --- | --- | --- | --- | --- | --- | --- | --- | --- | --- | --- |
|  | **Optimism** | | | | **Freedom to pursue**  **what's important** | | | | **Inner peace** | | | | **Life balance** | | | |
| Country | **Mean** | **Rank** | **St dev** | **Rank** | **Mean** | **Rank** | **St dev** | **Rank** | **Mean** | **Rank** | **St dev** | **Rank** | **Mean** | **Rank** | **St dev** | **Rank** |
| Argentina | 8.86 | 6 | 1.82 | 6 | 8.29 | 6 | 2.23 | 10 | 0.67 | 17 | 0.47 | 17 | 0.72 | 13 | 0.45 | 11 |
| Australia | 7.41 | 19 | 2.27 | 16 | 7.11 | 20 | 2.53 | 17 | 0.78 | 11 | 0.42 | 11 | 0.71 | 14 | 0.46 | 14 |
| Brazil | 9.22 | 1 | 1.62 | 1 | 8.27 | 7 | 2.39 | 15 | 0.71 | 14 | 0.45 | 13 | 0.67 | 18 | 0.47 | 18 |
| China | 7.63 | 17 | 1.94 | 8 | 6.91 | 22 | 2.19 | 9 | 0.88 | 2 | 0.33 | 2 | 0.85 | 1 | 0.36 | 1 |
| Egypt | 7.66 | 14 | 2.57 | 22 | 7.56 | 13 | 2.70 | 21 | 0.86 | 4 | 0.34 | 4 | 0.80 | 4 | 0.40 | 3 |
| Germany | 7.50 | 18 | 2.11 | 12 | 7.56 | 14 | 2.12 | 7 | 0.80 | 7 | 0.40 | 7 | 0.77 | 7 | 0.42 | 7 |
| Hong Kong | 7.23 | 21 | 2.10 | 11 | 7.29 | 17 | 2.06 | 6 | 0.89 | 1 | 0.32 | 1 | 0.80 | 3 | 0.40 | 4 |
| India | 8.14 | 12 | 2.90 | 23 | 8.15 | 9 | 2.96 | 22 | 0.61 | 20 | 0.49 | 19 | 0.51 | 20 | 0.50 | 21 |
| Indonesia | 9.15 | 2 | 1.69 | 3 | 8.77 | 1 | 1.81 | 1 | 0.71 | 13 | 0.45 | 14 | 0.69 | 17 | 0.46 | 17 |
| Israel | 8.38 | 9 | 1.78 | 5 | 8.00 | 10 | 1.89 | 3 | 0.87 | 3 | 0.34 | 3 | 0.83 | 2 | 0.38 | 2 |
| Japan | 6.74 | 23 | 2.27 | 15 | 6.43 | 23 | 2.14 | 8 | 0.68 | 16 | 0.47 | 15 | 0.72 | 12 | 0.45 | 12 |
| Kenya | 8.92 | 4 | 2.20 | 13 | 8.42 | 5 | 2.57 | 19 | 0.61 | 19 | 0.49 | 20 | 0.54 | 19 | 0.50 | 20 |
| Mexico | 9.06 | 3 | 1.66 | 2 | 8.56 | 3 | 1.96 | 4 | 0.68 | 15 | 0.47 | 16 | 0.76 | 9 | 0.42 | 9 |
| Nigeria | 8.90 | 5 | 1.77 | 4 | 8.16 | 8 | 2.27 | 12 | 0.79 | 8 | 0.41 | 8 | 0.72 | 11 | 0.45 | 13 |
| Philippines | 8.79 | 7 | 2.00 | 10 | 8.59 | 2 | 2.00 | 5 | 0.50 | 22 | 0.50 | 22 | 0.50 | 21 | 0.50 | 22 |
| Poland | 7.72 | 13 | 1.83 | 7 | 7.60 | 12 | 1.87 | 2 | 0.78 | 10 | 0.41 | 10 | 0.78 | 6 | 0.41 | 6 |
| South Africa | 8.22 | 11 | 2.22 | 14 | 7.97 | 11 | 2.39 | 14 | 0.80 | 6 | 0.40 | 6 | 0.70 | 15 | 0.46 | 15 |
| Spain | 8.25 | 10 | 1.97 | 9 | 7.45 | 16 | 2.28 | 13 | 0.55 | 21 | 0.50 | 21 | 0.77 | 8 | 0.42 | 8 |
| Sweden | 7.30 | 20 | 2.32 | 18 | 7.49 | 15 | 2.24 | 11 | 0.82 | 5 | 0.39 | 5 | 0.80 | 5 | 0.40 | 5 |
| Tanzania | 8.75 | 8 | 2.36 | 19 | 8.45 | 4 | 2.58 | 20 | 0.61 | 18 | 0.49 | 18 | 0.44 | 23 | 0.50 | 19 |
| Turkey | 7.65 | 16 | 2.50 | 21 | 7.28 | 18 | 2.97 | 23 | 0.49 | 23 | 0.50 | 23 | 0.48 | 22 | 0.50 | 23 |
| United Kingdom | 6.99 | 22 | 2.44 | 20 | 7.06 | 21 | 2.46 | 16 | 0.72 | 12 | 0.45 | 12 | 0.70 | 16 | 0.46 | 16 |
| United States | 7.65 | 15 | 2.29 | 17 | 7.20 | 19 | 2.53 | 18 | 0.79 | 9 | 0.41 | 9 | 0.74 | 10 | 0.44 | 10 |

|  | Psychological well-being | | | | | | | | | | | | | | | |
| --- | --- | --- | --- | --- | --- | --- | --- | --- | --- | --- | --- | --- | --- | --- | --- | --- |
|  | **Sense of mastery** | | | | **Meaningful**  **activities** | | | | **Understanding**  **purpose** | | | | **Self-rated**  **mental health** | | | |
| Country | **Mean** | **Rank** | **St dev** | **Rank** | **Mean** | **Rank** | **St dev** | **Rank** | **Mean** | **Rank** | **St dev** | **Rank** | **Mean** | **Rank** | **St dev** | **Rank** |
| Argentina | 0.88 | 4 | 0.32 | 3 | 7.92 | 6 | 2.22 | 12 | 7.92 | 11 | 2.33 | 11 | 7.87 | 11 | 2.16 | 11 |
| Australia | 0.85 | 10 | 0.35 | 10 | 7.22 | 16 | 2.11 | 8 | 6.85 | 20 | 2.53 | 17 | 6.81 | 20 | 2.27 | 18 |
| Brazil | 0.81 | 15 | 0.39 | 14 | 7.86 | 7 | 2.28 | 14 | 7.80 | 12 | 2.50 | 15 | 7.40 | 15 | 2.58 | 21 |
| China | 0.88 | 3 | 0.33 | 4 | 7.33 | 10 | 1.77 | 2 | 7.17 | 17 | 2.05 | 6 | 7.53 | 12 | 1.88 | 4 |
| Egypt | 0.90 | 1 | 0.31 | 2 | 8.01 | 5 | 2.40 | 17 | 7.96 | 10 | 2.41 | 14 | 8.61 | 4 | 2.09 | 9 |
| Germany | 0.84 | 12 | 0.37 | 12 | 7.30 | 13 | 1.96 | 6 | 7.08 | 18 | 2.34 | 12 | 7.05 | 19 | 2.24 | 14 |
| Hong Kong | 0.86 | 6 | 0.35 | 8 | 7.27 | 15 | 1.98 | 7 | 7.24 | 15 | 2.15 | 8 | 7.17 | 18 | 2.14 | 10 |
| India | 0.70 | 19 | 0.46 | 19 | 6.93 | 19 | 3.41 | 23 | 8.04 | 8 | 2.99 | 23 | 7.44 | 14 | 3.28 | 23 |
| Indonesia | 0.78 | 17 | 0.42 | 17 | 8.53 | 1 | 1.89 | 4 | 8.88 | 1 | 1.67 | 1 | 8.58 | 5 | 1.90 | 5 |
| Israel | 0.87 | 5 | 0.34 | 5 | 8.09 | 3 | 1.92 | 5 | 8.44 | 5 | 1.82 | 2 | 8.47 | 6 | 1.80 | 1 |
| Japan | 0.39 | 23 | 0.49 | 23 | 5.99 | 23 | 2.25 | 13 | 5.67 | 23 | 2.29 | 10 | 6.21 | 23 | 2.23 | 13 |
| Kenya | 0.69 | 20 | 0.46 | 20 | 7.20 | 17 | 3.10 | 21 | 8.51 | 2 | 2.51 | 16 | 8.73 | 2 | 2.27 | 17 |
| Mexico | 0.90 | 2 | 0.30 | 1 | 8.43 | 2 | 1.87 | 3 | 8.44 | 4 | 1.96 | 3 | 8.35 | 7 | 1.84 | 3 |
| Nigeria | 0.81 | 14 | 0.40 | 15 | 7.43 | 9 | 2.54 | 18 | 8.36 | 6 | 2.11 | 7 | 8.66 | 3 | 2.06 | 7 |
| Philippines | 0.63 | 22 | 0.48 | 22 | 8.02 | 4 | 2.33 | 16 | 8.45 | 3 | 2.02 | 5 | 8.05 | 10 | 2.02 | 6 |
| Poland | 0.84 | 11 | 0.37 | 13 | 7.71 | 8 | 1.76 | 1 | 7.77 | 13 | 1.99 | 4 | 8.07 | 9 | 1.81 | 2 |
| South Africa | 0.84 | 13 | 0.36 | 11 | 6.71 | 21 | 2.78 | 19 | 8.07 | 7 | 2.40 | 13 | 8.18 | 8 | 2.46 | 19 |
| Spain | 0.86 | 8 | 0.35 | 7 | 7.30 | 11 | 2.17 | 9 | 7.34 | 14 | 2.26 | 9 | 7.46 | 13 | 2.18 | 12 |
| Sweden | 0.86 | 7 | 0.35 | 9 | 7.06 | 18 | 2.21 | 11 | 6.65 | 21 | 2.54 | 18 | 7.18 | 17 | 2.25 | 15 |
| Tanzania | 0.66 | 21 | 0.48 | 21 | 7.30 | 14 | 3.21 | 22 | 8.02 | 9 | 2.96 | 21 | 8.99 | 1 | 2.08 | 8 |
| Turkey | 0.74 | 18 | 0.44 | 18 | 6.13 | 22 | 3.06 | 20 | 7.19 | 16 | 2.97 | 22 | 6.27 | 22 | 3.00 | 22 |
| United Kingdom | 0.80 | 16 | 0.40 | 16 | 6.89 | 20 | 2.31 | 15 | 6.65 | 22 | 2.64 | 20 | 6.80 | 21 | 2.48 | 20 |
| United States | 0.86 | 9 | 0.34 | 6 | 7.30 | 12 | 2.19 | 10 | 6.99 | 19 | 2.59 | 19 | 7.19 | 16 | 2.25 | 16 |

|  | Psychological distress | | | | | | | | | | | | | | | |
| --- | --- | --- | --- | --- | --- | --- | --- | --- | --- | --- | --- | --- | --- | --- | --- | --- |
|  | **Traumatic distress** | | | | **Depression**  **composite** | | | | **Depression –**  **feel hopeless** | | | | **Depression –**  **loss of interest** | | | |
| Country | **Mean** | **Rank** | **St dev** | **Rank** | **Mean** | **Rank** | **St dev** | **Rank** | **Mean** | **Rank** | **St dev** | **Rank** | **Mean** | **Rank** | **St dev** | **Rank** |
| Argentina | 0.38 | 16 | 0.49 | 16 | 0.36 | 14 | 0.48 | 14 | 0.27 | 15 | 0.45 | 16 | 0.32 | 15 | 0.47 | 15 |
| Australia | 0.30 | 8 | 0.46 | 8 | 0.24 | 8 | 0.43 | 8 | 0.18 | 9 | 0.38 | 9 | 0.22 | 8 | 0.41 | 8 |
| Brazil | 0.51 | 21 | 0.50 | 21 | 0.41 | 17 | 0.49 | 17 | 0.30 | 18 | 0.46 | 18 | 0.39 | 18 | 0.49 | 18 |
| China | 0.24 | 3 | 0.43 | 3 | 0.30 | 12 | 0.46 | 12 | 0.14 | 5 | 0.35 | 5 | 0.31 | 14 | 0.46 | 14 |
| Egypt | 0.53 | 23 | 0.50 | 19 | 0.36 | 15 | 0.48 | 15 | 0.27 | 16 | 0.45 | 15 | 0.30 | 13 | 0.46 | 13 |
| Germany | 0.29 | 6 | 0.46 | 7 | 0.15 | 2 | 0.36 | 2 | 0.13 | 3 | 0.33 | 3 | 0.13 | 1 | 0.34 | 1 |
| Hong Kong | 0.37 | 14 | 0.48 | 14 | 0.45 | 20 | 0.50 | 20 | 0.24 | 14 | 0.43 | 14 | 0.43 | 20 | 0.50 | 20 |
| India | 0.48 | 20 | 0.50 | 22 | 0.49 | 22 | 0.50 | 22 | 0.31 | 20 | 0.46 | 19 | 0.47 | 22 | 0.50 | 22 |
| Indonesia | 0.22 | 2 | 0.42 | 2 | 0.19 | 4 | 0.40 | 4 | 0.11 | 2 | 0.31 | 2 | 0.18 | 4 | 0.39 | 4 |
| Israel | 0.32 | 9 | 0.47 | 9 | 0.21 | 6 | 0.41 | 6 | 0.15 | 6 | 0.36 | 6 | 0.20 | 6 | 0.40 | 6 |
| Japan | 0.29 | 7 | 0.45 | 6 | 0.22 | 7 | 0.41 | 7 | 0.17 | 8 | 0.37 | 8 | 0.21 | 7 | 0.41 | 7 |
| Kenya | 0.47 | 19 | 0.50 | 20 | 0.40 | 16 | 0.49 | 16 | 0.28 | 17 | 0.45 | 17 | 0.33 | 16 | 0.47 | 16 |
| Mexico | 0.38 | 15 | 0.49 | 15 | 0.28 | 9 | 0.45 | 9 | 0.21 | 10 | 0.40 | 10 | 0.25 | 9 | 0.44 | 9 |
| Nigeria | 0.39 | 17 | 0.49 | 17 | 0.45 | 21 | 0.50 | 19 | 0.31 | 19 | 0.46 | 20 | 0.41 | 19 | 0.49 | 19 |
| Philippines | 0.46 | 18 | 0.50 | 18 | 0.50 | 23 | 0.50 | 23 | 0.36 | 22 | 0.48 | 22 | 0.49 | 23 | 0.50 | 23 |
| Poland | 0.16 | 1 | 0.37 | 1 | 0.14 | 1 | 0.35 | 1 | 0.09 | 1 | 0.29 | 1 | 0.15 | 2 | 0.36 | 2 |
| South Africa | 0.35 | 11 | 0.48 | 11 | 0.32 | 13 | 0.47 | 13 | 0.24 | 13 | 0.43 | 13 | 0.28 | 12 | 0.45 | 12 |
| Spain | 0.37 | 13 | 0.48 | 13 | 0.29 | 11 | 0.45 | 10 | 0.22 | 11 | 0.42 | 11 | 0.26 | 10 | 0.44 | 10 |
| Sweden | 0.25 | 4 | 0.43 | 4 | 0.18 | 3 | 0.39 | 3 | 0.14 | 4 | 0.34 | 4 | 0.16 | 3 | 0.37 | 3 |
| Tanzania | 0.36 | 12 | 0.48 | 12 | 0.45 | 19 | 0.50 | 21 | 0.41 | 23 | 0.49 | 23 | 0.43 | 21 | 0.50 | 21 |
| Turkey | 0.52 | 22 | 0.50 | 23 | 0.42 | 18 | 0.49 | 18 | 0.35 | 21 | 0.48 | 21 | 0.36 | 17 | 0.48 | 17 |
| United Kingdom | 0.34 | 10 | 0.47 | 10 | 0.29 | 10 | 0.45 | 11 | 0.23 | 12 | 0.42 | 12 | 0.27 | 11 | 0.44 | 11 |
| United States | 0.27 | 5 | 0.45 | 5 | 0.20 | 5 | 0.40 | 5 | 0.16 | 7 | 0.37 | 7 | 0.18 | 5 | 0.39 | 5 |

|  | Psychological distress | | | | | | | | | | | | | | | |
| --- | --- | --- | --- | --- | --- | --- | --- | --- | --- | --- | --- | --- | --- | --- | --- | --- |
|  | **Anxiety symptoms**  **composite** | | | | **Anxiety –**  **feel on edge** | | | | **Anxiety –**  **cannot stop worrying** | | | | **Suffering** | | | |
| Country | **Mean** | **Rank** | **St dev** | **Rank** | **Mean** | **Rank** | **St dev** | **Rank** | **Mean** | **Rank** | **St dev** | **Rank** | **Mean** | **Rank** | **St dev** | **Rank** |
| Argentina | 0.41 | 19 | 0.49 | 19 | 0.35 | 19 | 0.48 | 19 | 0.32 | 21 | 0.47 | 21 | 21 | 11 | 0.50 | 13 |
| Australia | 0.23 | 8 | 0.42 | 8 | 0.21 | 8 | 0.40 | 8 | 0.18 | 8 | 0.39 | 8 | 8 | 16 | 0.50 | 17 |
| Brazil | 0.46 | 22 | 0.50 | 22 | 0.40 | 23 | 0.49 | 23 | 0.39 | 22 | 0.49 | 22 | 22 | 21 | 0.50 | 14 |
| China | 0.18 | 5 | 0.39 | 5 | 0.15 | 6 | 0.36 | 6 | 0.15 | 6 | 0.35 | 6 | 6 | 6 | 0.47 | 5 |
| Egypt | 0.44 | 21 | 0.50 | 21 | 0.40 | 22 | 0.49 | 21 | 0.31 | 18 | 0.46 | 18 | 18 | 17 | 0.50 | 18 |
| Germany | 0.19 | 6 | 0.39 | 7 | 0.14 | 4 | 0.35 | 4 | 0.16 | 7 | 0.37 | 7 | 7 | 15 | 0.50 | 19 |
| Hong Kong | 0.29 | 13 | 0.45 | 10 | 0.25 | 13 | 0.43 | 12 | 0.23 | 10 | 0.42 | 10 | 10 | 13 | 0.50 | 20 |
| India | 0.36 | 17 | 0.48 | 16 | 0.31 | 18 | 0.46 | 18 | 0.32 | 20 | 0.47 | 19 | 20 | 19 | 0.50 | 21 |
| Indonesia | 0.14 | 2 | 0.35 | 2 | 0.13 | 3 | 0.34 | 3 | 0.11 | 2 | 0.31 | 2 | 2 | 2 | 0.44 | 2 |
| Israel | 0.16 | 4 | 0.37 | 4 | 0.12 | 2 | 0.33 | 2 | 0.14 | 5 | 0.35 | 5 | 5 | 3 | 0.45 | 3 |
| Japan | 0.19 | 7 | 0.39 | 6 | 0.19 | 7 | 0.39 | 7 | 0.13 | 4 | 0.34 | 4 | 4 | 7 | 0.48 | 7 |
| Kenya | 0.36 | 16 | 0.48 | 17 | 0.27 | 14 | 0.45 | 14 | 0.29 | 15 | 0.45 | 15 | 15 | 12 | 0.50 | 16 |
| Mexico | 0.29 | 10 | 0.46 | 12 | 0.23 | 11 | 0.42 | 11 | 0.25 | 12 | 0.43 | 12 | 12 | 8 | 0.49 | 8 |
| Nigeria | 0.37 | 18 | 0.48 | 18 | 0.30 | 16 | 0.46 | 16 | 0.31 | 16 | 0.46 | 16 | 16 | 9 | 0.49 | 11 |
| Philippines | 0.48 | 23 | 0.50 | 23 | 0.35 | 20 | 0.48 | 20 | 0.47 | 23 | 0.50 | 23 | 23 | 22 | 0.49 | 10 |
| Poland | 0.13 | 1 | 0.33 | 1 | 0.12 | 1 | 0.32 | 1 | 0.09 | 1 | 0.29 | 1 | 1 | 1 | 0.43 | 1 |
| South Africa | 0.29 | 12 | 0.46 | 13 | 0.22 | 10 | 0.41 | 9 | 0.27 | 14 | 0.44 | 14 | 14 | 4 | 0.46 | 4 |
| Spain | 0.32 | 14 | 0.47 | 14 | 0.28 | 15 | 0.45 | 15 | 0.24 | 11 | 0.43 | 11 | 11 | 14 | 0.50 | 22 |
| Sweden | 0.16 | 3 | 0.36 | 3 | 0.15 | 5 | 0.35 | 5 | 0.12 | 3 | 0.32 | 3 | 3 | 5 | 0.48 | 6 |
| Tanzania | 0.32 | 15 | 0.47 | 15 | 0.31 | 17 | 0.46 | 17 | 0.32 | 19 | 0.47 | 20 | 19 | 20 | 0.50 | 15 |
| Turkey | 0.42 | 20 | 0.49 | 20 | 0.40 | 21 | 0.49 | 22 | 0.31 | 17 | 0.46 | 17 | 17 | 23 | 0.49 | 9 |
| United Kingdom | 0.29 | 11 | 0.45 | 11 | 0.25 | 12 | 0.43 | 13 | 0.25 | 13 | 0.43 | 13 | 13 | 18 | 0.50 | 23 |
| United States | 0.24 | 9 | 0.43 | 9 | 0.22 | 9 | 0.42 | 10 | 0.19 | 9 | 0.40 | 9 | 9 | 10 | 0.50 | 12 |

|  | Social well-being | | | | | | | | | | | | | | | |
| --- | --- | --- | --- | --- | --- | --- | --- | --- | --- | --- | --- | --- | --- | --- | --- | --- |
|  | **Relationship**  **contentment** | | | | **Relationship**  **satisfaction** | | | | **Social**  **support** | | | | **Intimate /**  **close friend** | | | |
| Country | **Mean** | **Rank** | **St dev** | **Rank** | **Mean** | **Rank** | **St dev** | **Rank** | **Mean** | **Rank** | **St dev** | **Rank** | **Mean** | **Rank** | **St dev** | **Rank** |
| Argentina | 8.05 | 6 | 2.37 | 15 | 7.57 | 9 | 2.45 | 12 | 8.20 | 3 | 2.54 | 13 | 0.81 | 18 | 0.39 | 18 |
| Australia | 7.25 | 21 | 2.29 | 11 | 6.84 | 21 | 2.48 | 15 | 8.12 | 6 | 2.28 | 7 | 0.85 | 10 | 0.35 | 11 |
| Brazil | 7.71 | 13 | 2.66 | 18 | 7.21 | 12 | 2.85 | 19 | 7.21 | 14 | 2.97 | 18 | 0.82 | 15 | 0.38 | 15 |
| China | 7.25 | 20 | 1.94 | 4 | 7.09 | 16 | 2.03 | 3 | 6.63 | 19 | 2.16 | 5 | 0.90 | 3 | 0.30 | 3 |
| Egypt | 7.93 | 8 | 2.69 | 19 | 7.84 | 5 | 2.60 | 17 | 6.93 | 17 | 3.61 | 22 | 0.88 | 5 | 0.33 | 5 |
| Germany | 7.45 | 15 | 2.20 | 10 | 7.09 | 15 | 2.37 | 10 | 8.09 | 7 | 2.14 | 4 | 0.85 | 11 | 0.35 | 10 |
| Hong Kong | 7.17 | 22 | 2.05 | 7 | 7.08 | 17 | 2.14 | 5 | 6.39 | 21 | 2.58 | 14 | 0.84 | 12 | 0.37 | 12 |
| India | 7.96 | 7 | 3.13 | 23 | 7.92 | 4 | 3.08 | 22 | 6.46 | 20 | 3.88 | 23 | 0.82 | 17 | 0.39 | 16 |
| Indonesia | 8.78 | 1 | 1.80 | 1 | 8.59 | 1 | 1.90 | 2 | 7.47 | 12 | 2.85 | 16 | 0.77 | 21 | 0.42 | 21 |
| Israel | 8.08 | 5 | 1.94 | 3 | 7.73 | 6 | 2.16 | 7 | 8.55 | 1 | 2.06 | 2 | 0.88 | 4 | 0.32 | 4 |
| Japan | 5.99 | 23 | 2.29 | 12 | 5.94 | 23 | 2.27 | 8 | 5.29 | 23 | 2.37 | 10 | 0.67 | 23 | 0.47 | 23 |
| Kenya | 8.09 | 4 | 2.70 | 20 | 7.67 | 7 | 2.95 | 21 | 6.96 | 16 | 3.37 | 20 | 0.82 | 16 | 0.39 | 17 |
| Mexico | 8.39 | 3 | 2.01 | 5 | 8.00 | 3 | 2.14 | 6 | 8.27 | 2 | 2.36 | 9 | 0.79 | 19 | 0.41 | 19 |
| Nigeria | 7.83 | 9 | 2.38 | 16 | 7.61 | 8 | 2.45 | 13 | 6.64 | 18 | 2.92 | 17 | 0.93 | 1 | 0.26 | 1 |
| Philippines | 8.66 | 2 | 2.01 | 6 | 8.46 | 2 | 2.03 | 4 | 8.12 | 5 | 2.31 | 8 | 0.90 | 2 | 0.30 | 2 |
| Poland | 7.75 | 11 | 1.83 | 2 | 7.56 | 10 | 1.88 | 1 | 8.00 | 10 | 1.85 | 1 | 0.87 | 9 | 0.34 | 7 |
| South Africa | 7.61 | 14 | 2.51 | 17 | 7.18 | 13 | 2.70 | 18 | 7.19 | 15 | 2.82 | 15 | 0.83 | 14 | 0.37 | 13 |
| Spain | 7.72 | 12 | 2.06 | 8 | 7.10 | 14 | 2.34 | 9 | 8.08 | 8 | 2.23 | 6 | 0.87 | 7 | 0.34 | 6 |
| Sweden | 7.44 | 16 | 2.19 | 9 | 7.01 | 18 | 2.43 | 11 | 8.16 | 4 | 2.12 | 3 | 0.87 | 6 | 0.34 | 8 |
| Tanzania | 7.76 | 10 | 3.05 | 22 | 7.35 | 11 | 3.29 | 23 | 7.38 | 13 | 3.29 | 19 | 0.75 | 22 | 0.43 | 22 |
| Turkey | 7.28 | 19 | 2.90 | 21 | 6.71 | 22 | 2.90 | 20 | 5.47 | 22 | 3.49 | 21 | 0.78 | 20 | 0.42 | 20 |
| United Kingdom | 7.32 | 18 | 2.33 | 14 | 6.99 | 19 | 2.49 | 16 | 7.73 | 11 | 2.47 | 12 | 0.83 | 13 | 0.38 | 14 |
| United States | 7.38 | 17 | 2.33 | 13 | 6.97 | 20 | 2.47 | 14 | 8.02 | 9 | 2.44 | 11 | 0.87 | 8 | 0.34 | 9 |

|  | Social well-being | | | | | | | | | | | | | | | |
| --- | --- | --- | --- | --- | --- | --- | --- | --- | --- | --- | --- | --- | --- | --- | --- | --- |
|  | **Government**  **approval** | | | | **Say in government** | | | | **Belonging**  **in country** | | | | **City/place**  **satisfaction** | | | |
| Country | **Mean** | **Rank** | **St dev** | **Rank** | **Mean** | **Rank** | **St dev** | **Rank** | **Mean** | **Rank** | **St dev** | **Rank** | **Mean** | **Rank** | **St dev** | **Rank** |
| Argentina | 0.25 | 17 | 0.44 | 7 | 0.38 | 13 | 0.49 | 12 | 8.08 | 8 | 1.80 | 1 | 0.71 | 16 | 0.45 | 16 |
| Australia | 0.43 | 7 | 0.50 | 18 | 0.38 | 12 | 0.49 | 14 | 7.80 | 9 | 2.00 | 2 | 0.84 | 7 | 0.37 | 7 |
| Brazil | 0.35 | 14 | 0.48 | 11 | 0.27 | 16 | 0.45 | 9 | 7.79 | 10 | 2.00 | 3 | 0.62 | 21 | 0.49 | 21 |
| China | - | - |  |  | - | - |  |  | - | - | 2.17 | 4 | 0.86 | 5 | 0.35 | 6 |
| Egypt | **-** | **-** |  |  | 0.49 | 4 | 0.50 | 21 | 8.86 | 1 | 2.19 | 5 | 0.75 | 13 | 0.43 | 13 |
| Germany | 0.34 | 15 | 0.47 | 10 | 0.42 | 9 | 0.49 | 17 | 6.97 | 20 | 2.20 | 6 | 0.81 | 11 | 0.39 | 11 |
| Hong Kong | 0.53 | 5 | 0.50 | 20 | 0.47 | 5 | 0.50 | 20 | 7.40 | 16 | 2.27 | 7 | 0.70 | 18 | 0.46 | 18 |
| India | 0.84 | 2 | 0.36 | 2 | 0.78 | 2 | 0.42 | 5 | 8.40 | 5 | 2.30 | 8 | 0.93 | 1 | 0.26 | 1 |
| Indonesia | 0.42 | 9 | 0.49 | 16 | 0.80 | 1 | 0.40 | 2 | 8.78 | 2 | 2.30 | 9 | 0.90 | 2 | 0.30 | 2 |
| Israel | 0.39 | 11 | 0.49 | 14 | 0.32 | 14 | 0.47 | 11 | 7.72 | 12 | 2.39 | 10 | 0.87 | 4 | 0.34 | 4 |
| Japan | 0.19 | 21 | 0.40 | 3 | 0.22 | 21 | 0.41 | 3 | 6.03 | 22 | 2.48 | 11 | 0.56 | 22 | 0.50 | 22 |
| Kenya | 0.52 | 6 | 0.50 | 21 | 0.38 | 11 | 0.49 | 13 | 7.77 | 11 | 2.49 | 12 | 0.80 | 12 | 0.40 | 12 |
| Mexico | 0.56 | 4 | 0.50 | 19 | 0.44 | 7 | 0.50 | 18 | 8.49 | 4 | 2.53 | 13 | 0.75 | 14 | 0.43 | 14 |
| Nigeria | 0.40 | 10 | 0.49 | 15 | 0.41 | 10 | 0.49 | 15 | 7.24 | 17 | 2.54 | 14 | 0.73 | 15 | 0.45 | 15 |
| Philippines | 0.70 | 3 | 0.46 | 8 | 0.46 | 6 | 0.50 | 19 | 8.14 | 7 | 2.56 | 15 | 0.86 | 6 | 0.34 | 5 |
| Poland | 0.33 | 16 | 0.47 | 9 | 0.26 | 17 | 0.44 | 8 | 7.72 | 13 | 2.65 | 16 | 0.88 | 3 | 0.33 | 3 |
| South Africa | 0.38 | 12 | 0.49 | 13 | 0.50 | 3 | 0.50 | 22 | 7.65 | 14 | 2.71 | 17 | 0.55 | 23 | 0.50 | 23 |
| Spain | 0.36 | 13 | 0.48 | 12 | 0.14 | 22 | 0.35 | 1 | 7.50 | 15 | 2.76 | 18 | 0.81 | 10 | 0.39 | 10 |
| Sweden | 0.24 | 18 | 0.43 | 6 | 0.22 | 20 | 0.41 | 4 | 8.58 | 3 | 2.81 | 19 | 0.82 | 8 | 0.38 | 8 |
| Tanzania | 0.88 | 1 | 0.32 | 1 | 0.42 | 8 | 0.49 | 16 | 8.23 | 6 | 2.87 | 20 | 0.81 | 9 | 0.39 | 9 |
| Turkey | 0.42 | 8 | 0.49 | 17 | 0.29 | 15 | 0.45 | 10 | 6.87 | 21 | 3.07 | 21 | 0.64 | 20 | 0.48 | 20 |
| United Kingdom | 0.20 | 20 | 0.40 | 4 | 0.23 | 19 | 0.42 | 6 | 7.13 | 18 | 3.35 | 22 | 0.71 | 17 | 0.45 | 17 |
| United States | 0.23 | 19 | 0.42 | 5 | 0.25 | 18 | 0.44 | 7 | 7.07 | 19 | 1.80 | 1 | 0.69 | 19 | 0.46 | 19 |

|  | Social well-being | | | | Social participation | | | | | | | | | | | |
| --- | --- | --- | --- | --- | --- | --- | --- | --- | --- | --- | --- | --- | --- | --- | --- | --- |
|  | **Trust within**  **country** | | | | **Ever been**  **married** | | | | **Currently**  **divorced** | | | | **Number of**  **children** | | | |
| Country | **Mean** | **Rank** | **St dev** | **Rank** | **Mean** | **Rank** | **St dev** | **Rank** | **Mean** | **Rank** | **St dev** | **Rank** | **Mean** | **Rank** | **St dev** | **Rank** |
| Argentina | 0.55 | 16 | 0.50 | 18 | 0.41 | 22 | 0.49 | 19 | 0.05 | 15 | 0.22 | 13 | 1.07 | 10 | 1.49 | 14 |
| Australia | 0.78 | 7 | 0.37 | 3 | 0.66 | 13 | 0.48 | 15 | 0.09 | 21 | 0.28 | 21 | 0.52 | 21 | 0.96 | 4 |
| Brazil | 0.46 | 21 | 0.50 | 20 | 0.50 | 21 | 0.50 | 23 | 0.07 | 17 | 0.25 | 16 | 0.92 | 13 | 1.34 | 11 |
| China | 0.81 | 5 | 0.32 | 1 | 0.77 | 4 | 0.42 | 4 | 0.02 | 7 | 0.15 | 8 | 0.74 | 14 | 0.79 | 1 |
| Egypt | 0.64 | 13 | 0.50 | 19 | 0.80 | 3 | 0.40 | 2 | 0.02 | 6 | 0.15 | 7 | 1.77 | 6 | 1.52 | 16 |
| Germany | 0.67 | 11 | 0.45 | 10 | 0.66 | 14 | 0.48 | 16 | 0.08 | 18 | 0.27 | 18 | 0.39 | 23 | 0.96 | 3 |
| Hong Kong | 0.53 | 18 | 0.39 | 5 | 0.75 | 6 | 0.43 | 6 | 0.04 | 10 | 0.18 | 10 | 0.56 | 18 | 1.01 | 5 |
| India | 0.88 | 1 | 0.38 | 4 | 0.82 | 1 | 0.39 | 1 | 0.00 | 1 | 0.05 | 2 | 1.50 | 7 | 1.77 | 19 |
| Indonesia | 0.85 | 2 | 0.41 | 7 | 0.80 | 2 | 0.40 | 3 | 0.03 | 9 | 0.17 | 9 | 1.31 | 8 | 1.54 | 17 |
| Israel | 0.82 | 4 | 0.48 | 16 | 0.72 | 10 | 0.45 | 10 | 0.07 | 16 | 0.26 | 17 | 1.03 | 12 | 1.49 | 15 |
| Japan | 0.37 | 22 | 0.44 | 9 | 0.75 | 7 | 0.43 | 7 | 0.10 | 22 | 0.31 | 23 | 0.41 | 22 | 1.48 | 13 |
| Kenya | 0.65 | 12 | 0.50 | 22 | 0.68 | 12 | 0.47 | 13 | 0.01 | 4 | 0.10 | 3 | 2.03 | 3 | 1.85 | 20 |
| Mexico | 0.63 | 14 | 0.48 | 12 | 0.54 | 20 | 0.50 | 21 | 0.04 | 12 | 0.20 | 11 | 1.16 | 9 | 1.42 | 12 |
| Nigeria | 0.61 | 15 | 0.50 | 23 | 0.66 | 15 | 0.47 | 14 | 0.01 | 5 | 0.10 | 4 | 2.85 | 1 | 2.61 | 23 |
| Philippines | 0.79 | 6 | 0.36 | 2 | 0.55 | 18 | 0.50 | 20 | 0.00 | 2 | 0.04 | 1 | 1.84 | 5 | 1.62 | 18 |
| Poland | 0.84 | 3 | 0.48 | 13 | 0.77 | 5 | 0.42 | 5 | 0.05 | 13 | 0.22 | 14 | 0.53 | 20 | 0.89 | 2 |
| South Africa | 0.37 | 23 | 0.48 | 14 | 0.30 | 23 | 0.46 | 12 | 0.02 | 8 | 0.14 | 6 | 1.91 | 4 | 1.94 | 21 |
| Spain | 0.72 | 10 | 0.49 | 17 | 0.62 | 17 | 0.48 | 18 | 0.08 | 20 | 0.28 | 20 | 0.63 | 15 | 1.25 | 8 |
| Sweden | 0.74 | 8 | 0.41 | 6 | 0.54 | 19 | 0.50 | 22 | 0.05 | 14 | 0.23 | 15 | 0.55 | 19 | 1.03 | 6 |
| Tanzania | 0.73 | 9 | 0.44 | 8 | 0.72 | 9 | 0.45 | 9 | 0.01 | 3 | 0.11 | 5 | 2.64 | 2 | 2.04 | 22 |
| Turkey | 0.52 | 20 | 0.48 | 15 | 0.74 | 8 | 0.44 | 8 | 0.04 | 11 | 0.21 | 12 | 1.04 | 11 | 1.33 | 10 |
| United Kingdom | 0.54 | 17 | 0.47 | 11 | 0.63 | 16 | 0.48 | 17 | 0.08 | 19 | 0.27 | 19 | 0.57 | 17 | 1.04 | 7 |
| United States | 0.52 | 19 | 0.50 | 21 | 0.70 | 11 | 0.46 | 11 | 0.10 | 23 | 0.29 | 22 | 0.59 | 16 | 1.28 | 9 |

|  | Social participation | | | | | | | | Social distress | | | | | | | |
| --- | --- | --- | --- | --- | --- | --- | --- | --- | --- | --- | --- | --- | --- | --- | --- | --- |
|  | **Community**  **participation** | | | | **Religious**  **attendance** | | | | **Loneliness** | | | | **Perceived**  **discrimination** | | | |
| Country | **Mean** | **Rank** | **St dev** | **Rank** | **Mean** | **Rank** | **St dev** | **Rank** | **Mean** | **Rank** | **St dev** | **Rank** | **Mean** | **Rank** | **St dev** | **Rank** |
| Argentina | 0.19 | 14 | 0.40 | 10 | 0.19 | 16 | 0.40 | 9 | 3.56 | 17 | 3.30 | 17 | 0.24 | 14 | 0.43 | 14 |
| Australia | 0.28 | 3 | 0.45 | 21 | 0.12 | 19 | 0.33 | 5 | 3.33 | 11 | 2.80 | 9 | 0.18 | 7 | 0.38 | 7 |
| Brazil | 0.18 | 16 | 0.39 | 8 | 0.35 | 10 | 0.48 | 18 | 3.91 | 21 | 3.44 | 18 | 0.31 | 20 | 0.46 | 20 |
| China | 0.15 | 18 | 0.36 | 6 | 0.05 | 21 | 0.21 | 3 | 3.34 | 12 | 2.44 | 3 | 0.17 | 6 | 0.37 | 6 |
| Egypt | 0.07 | 23 | 0.26 | 1 | 0.38 | 9 | 0.49 | 19 | 3.82 | 19 | 3.74 | 22 | 0.47 | 23 | 0.50 | 23 |
| Germany | 0.23 | 7 | 0.42 | 17 | 0.07 | 20 | 0.26 | 4 | 2.99 | 4 | 2.64 | 5 | 0.15 | 4 | 0.35 | 4 |
| Hong Kong | 0.21 | 10 | 0.41 | 15 | 0.27 | 14 | 0.44 | 14 | 3.26 | 7 | 2.55 | 4 | 0.28 | 17 | 0.45 | 17 |
| India | 0.13 | 19 | 0.34 | 5 | 0.48 | 8 | 0.50 | 20 | 3.84 | 20 | 4.00 | 23 | 0.22 | 12 | 0.41 | 11 |
| Indonesia | 0.32 | 2 | 0.47 | 22 | 0.75 | 4 | 0.44 | 13 | 2.49 | 3 | 2.97 | 13 | 0.21 | 10 | 0.41 | 10 |
| Israel | 0.20 | 12 | 0.40 | 12 | 0.31 | 13 | 0.46 | 15 | 2.30 | 1 | 2.40 | 2 | 0.21 | 9 | 0.40 | 9 |
| Japan | 0.09 | 22 | 0.29 | 2 | 0.03 | 23 | 0.18 | 1 | 4.02 | 22 | 2.66 | 6 | 0.16 | 5 | 0.37 | 5 |
| Kenya | 0.27 | 4 | 0.45 | 20 | 0.78 | 2 | 0.42 | 10 | 3.54 | 16 | 3.53 | 21 | 0.30 | 19 | 0.46 | 19 |
| Mexico | 0.16 | 17 | 0.37 | 7 | 0.33 | 12 | 0.47 | 16 | 3.31 | 9 | 3.23 | 16 | 0.23 | 13 | 0.42 | 13 |
| Nigeria | 0.33 | 1 | 0.47 | 23 | 0.87 | 1 | 0.33 | 6 | 3.22 | 6 | 2.93 | 12 | 0.34 | 21 | 0.47 | 21 |
| Philippines | 0.19 | 13 | 0.39 | 9 | 0.52 | 6 | 0.50 | 21 | 3.52 | 15 | 3.20 | 15 | 0.26 | 16 | 0.44 | 16 |
| Poland | 0.10 | 21 | 0.30 | 3 | 0.35 | 11 | 0.48 | 17 | 2.44 | 2 | 2.25 | 1 | 0.13 | 2 | 0.34 | 2 |
| South Africa | 0.24 | 5 | 0.43 | 19 | 0.49 | 7 | 0.50 | 22 | 3.67 | 18 | 3.05 | 14 | 0.37 | 22 | 0.48 | 22 |
| Spain | 0.23 | 6 | 0.42 | 18 | 0.16 | 17 | 0.36 | 8 | 3.32 | 10 | 2.71 | 8 | 0.19 | 8 | 0.40 | 8 |
| Sweden | 0.19 | 15 | 0.40 | 11 | 0.04 | 22 | 0.21 | 2 | 3.03 | 5 | 2.66 | 7 | 0.10 | 1 | 0.30 | 1 |
| Tanzania | 0.20 | 11 | 0.40 | 13 | 0.76 | 3 | 0.43 | 12 | 3.37 | 13 | 3.52 | 20 | 0.14 | 3 | 0.34 | 3 |
| Turkey | 0.21 | 9 | 0.41 | 14 | 0.52 | 5 | 0.50 | 23 | 4.57 | 23 | 3.45 | 19 | 0.29 | 18 | 0.45 | 18 |
| United Kingdom | 0.22 | 8 | 0.41 | 16 | 0.15 | 18 | 0.36 | 7 | 3.51 | 14 | 2.91 | 11 | 0.22 | 11 | 0.42 | 12 |
| United States | 0.13 | 20 | 0.34 | 4 | 0.22 | 15 | 0.42 | 11 | 3.29 | 8 | 2.84 | 10 | 0.26 | 15 | 0.44 | 15 |

|  | Character and prosocial behavior | | | | | | | | | | | | | | | |
| --- | --- | --- | --- | --- | --- | --- | --- | --- | --- | --- | --- | --- | --- | --- | --- | --- |
|  | **Orientation to**  **promote good** | | | | **Delayed**  **gratification** | | | | **Hope** | | | | **Gratitude** | | | |
| Country | **Mean** | **Rank** | **St dev** | **Rank** | **Mean** | **Rank** | **St dev** | **Rank** | **Mean** | **Rank** | **St dev** | **Rank** | **Mean** | **Rank** | **St dev** | **Rank** |
| Argentina | 8.63 | 2 | 1.64 | 4 | 8.12 | 5 | 2.11 | 13 | 8.92 | 4 | 1.67 | 3 | 8.53 | 5 | 1.99 | 4 |
| Australia | 7.86 | 15 | 1.61 | 3 | 7.25 | 13 | 1.94 | 1 | 7.70 | 17 | 2.02 | 12 | 7.84 | 12 | 2.23 | 14 |
| Brazil | 8.59 | 4 | 1.79 | 9 | 8.10 | 6 | 2.26 | 15 | 8.87 | 5 | 1.88 | 8 | 8.61 | 4 | 2.05 | 8 |
| China | 7.26 | 22 | 1.80 | 11 | 6.74 | 22 | 2.09 | 12 | 7.46 | 19 | 1.89 | 9 | 7.26 | 20 | 2.00 | 6 |
| Egypt | 8.35 | 8 | 2.08 | 17 | 6.94 | 19 | 3.00 | 21 | 8.18 | 12 | 2.44 | 20 | 7.74 | 14 | 2.52 | 19 |
| Germany | 7.69 | 17 | 1.83 | 13 | 6.94 | 20 | 2.15 | 14 | 7.65 | 18 | 1.95 | 10 | 7.64 | 16 | 2.16 | 11 |
| Hong Kong | 7.32 | 21 | 1.94 | 14 | 7.11 | 16 | 1.96 | 3 | 7.29 | 21 | 2.07 | 14 | 6.97 | 21 | 2.22 | 13 |
| India | 8.35 | 7 | 2.68 | 22 | 7.21 | 14 | 3.48 | 23 | 8.32 | 11 | 2.77 | 23 | 7.68 | 15 | 3.15 | 23 |
| Indonesia | 8.63 | 1 | 1.80 | 10 | 8.35 | 2 | 2.02 | 6 | 9.17 | 1 | 1.44 | 1 | 8.93 | 1 | 1.76 | 2 |
| Israel | 8.38 | 6 | 1.60 | 2 | 7.52 | 9 | 2.31 | 16 | 8.40 | 9 | 1.73 | 4 | 7.90 | 9 | 2.03 | 7 |
| Japan | 6.12 | 23 | 2.06 | 16 | 5.16 | 23 | 2.05 | 10 | 5.95 | 23 | 2.23 | 17 | 5.81 | 23 | 2.24 | 15 |
| Kenya | 8.16 | 11 | 2.68 | 21 | 8.04 | 7 | 2.79 | 20 | 8.76 | 6 | 2.33 | 19 | 8.07 | 8 | 2.73 | 20 |
| Mexico | 8.62 | 3 | 1.59 | 1 | 8.27 | 4 | 2.04 | 8 | 9.00 | 2 | 1.56 | 2 | 8.84 | 2 | 1.75 | 1 |
| Nigeria | 8.21 | 9 | 2.12 | 18 | 8.32 | 3 | 2.07 | 11 | 8.65 | 7 | 1.97 | 11 | 8.42 | 6 | 2.11 | 10 |
| Philippines | 8.54 | 5 | 1.97 | 15 | 8.42 | 1 | 1.97 | 4 | 8.92 | 3 | 1.82 | 6 | 8.64 | 3 | 2.00 | 5 |
| Poland | 7.92 | 13 | 1.64 | 5 | 6.80 | 21 | 2.31 | 17 | 7.94 | 14 | 1.78 | 5 | 7.35 | 19 | 1.82 | 3 |
| South Africa | 7.82 | 16 | 2.36 | 19 | 7.67 | 8 | 2.44 | 18 | 8.59 | 8 | 2.07 | 13 | 7.84 | 11 | 2.42 | 18 |
| Spain | 8.10 | 12 | 1.69 | 6 | 7.51 | 10 | 2.00 | 5 | 8.08 | 13 | 1.87 | 7 | 7.79 | 13 | 2.09 | 9 |
| Sweden | 7.56 | 20 | 1.71 | 8 | 6.99 | 17 | 2.04 | 7 | 7.26 | 22 | 2.22 | 16 | 7.49 | 17 | 2.24 | 16 |
| Tanzania | 8.18 | 10 | 2.69 | 23 | 7.50 | 11 | 3.22 | 22 | 8.35 | 10 | 2.65 | 21 | 7.85 | 10 | 2.88 | 22 |
| Turkey | 7.69 | 18 | 2.37 | 20 | 7.17 | 15 | 2.65 | 19 | 7.76 | 15 | 2.68 | 22 | 6.95 | 22 | 2.73 | 21 |
| United Kingdom | 7.61 | 19 | 1.81 | 12 | 6.96 | 18 | 2.05 | 9 | 7.39 | 20 | 2.24 | 18 | 7.41 | 18 | 2.35 | 17 |
| United States | 7.87 | 14 | 1.70 | 7 | 7.45 | 12 | 1.96 | 2 | 7.70 | 16 | 2.15 | 15 | 8.14 | 7 | 2.20 | 12 |

|  | Character and prosocial behavior | | | | | | | | | | | | | | | |
| --- | --- | --- | --- | --- | --- | --- | --- | --- | --- | --- | --- | --- | --- | --- | --- | --- |
|  | **Showing love/care** | | | | **Forgivingness** | | | | **Charitable giving** | | | | **Helping strangers** | | | |
| Country | **Mean** | **Rank** | **St dev** | **Rank** | **Mean** | **Rank** | **St dev** | **Rank** | **Mean** | **Rank** | **St dev** | **Rank** | **Mean** | **Rank** | **St dev** | **Rank** |
| Argentina | 8.51 | 9 | 2.13 | 15 | 0.74 | 16 | 0.44 | 15 | 0.20 | 19 | 0.40 | 4 | 0.67 | 5 | 0.47 | 7 |
| Australia | 8.31 | 12 | 1.75 | 4 | 0.78 | 8 | 0.41 | 7 | 0.53 | 5 | 0.50 | 19 | 0.62 | 11 | 0.49 | 14 |
| Brazil | 8.47 | 10 | 2.18 | 16 | 0.73 | 17 | 0.45 | 17 | 0.31 | 14 | 0.46 | 11 | 0.69 | 4 | 0.46 | 6 |
| China | 7.36 | 21 | 1.83 | 6 | 0.55 | 22 | 0.50 | 23 | 0.36 | 13 | 0.48 | 12 | 0.70 | 3 | 0.46 | 5 |
| Egypt | 8.27 | 14 | 2.67 | 22 | 0.87 | 2 | 0.34 | 2 | 0.58 | 3 | 0.49 | 17 | 0.72 | 2 | 0.45 | 4 |
| Germany | 7.81 | 19 | 2.02 | 13 | 0.75 | 13 | 0.44 | 13 | 0.36 | 12 | 0.48 | 14 | 0.51 | 18 | 0.50 | 22 |
| Hong Kong | 6.52 | 22 | 2.56 | 20 | 0.62 | 20 | 0.48 | 20 | 0.51 | 7 | 0.50 | 20 | 0.65 | 7 | 0.48 | 10 |
| India | 8.20 | 15 | 3.03 | 23 | 0.75 | 12 | 0.43 | 12 | 0.39 | 10 | 0.49 | 15 | 0.56 | 16 | 0.50 | 19 |
| Indonesia | 8.85 | 2 | 1.78 | 5 | 0.85 | 3 | 0.36 | 3 | 0.79 | 1 | 0.41 | 7 | 0.50 | 19 | 0.50 | 23 |
| Israel | 8.60 | 5 | 1.66 | 1 | 0.74 | 15 | 0.44 | 16 | 0.55 | 4 | 0.50 | 18 | 0.64 | 8 | 0.48 | 11 |
| Japan | 5.96 | 23 | 2.20 | 17 | 0.57 | 21 | 0.50 | 22 | 0.10 | 23 | 0.29 | 1 | 0.11 | 23 | 0.32 | 1 |
| Kenya | 8.57 | 7 | 2.42 | 19 | 0.85 | 4 | 0.36 | 4 | 0.28 | 16 | 0.45 | 9 | 0.66 | 6 | 0.47 | 9 |
| Mexico | 8.71 | 4 | 1.85 | 7 | 0.77 | 10 | 0.42 | 10 | 0.21 | 18 | 0.40 | 6 | 0.63 | 9 | 0.48 | 13 |
| Nigeria | 8.38 | 11 | 1.99 | 12 | 0.92 | 1 | 0.27 | 1 | 0.48 | 9 | 0.50 | 21 | 0.83 | 1 | 0.38 | 2 |
| Philippines | 9.05 | 1 | 1.71 | 3 | 0.74 | 14 | 0.44 | 14 | 0.14 | 22 | 0.35 | 2 | 0.63 | 10 | 0.48 | 12 |
| Poland | 7.80 | 20 | 1.98 | 10 | 0.65 | 19 | 0.48 | 19 | 0.20 | 20 | 0.40 | 5 | 0.26 | 22 | 0.44 | 3 |
| South Africa | 8.59 | 6 | 2.02 | 14 | 0.84 | 6 | 0.37 | 5 | 0.19 | 21 | 0.40 | 3 | 0.58 | 14 | 0.49 | 17 |
| Spain | 8.28 | 13 | 1.96 | 9 | 0.78 | 9 | 0.41 | 9 | 0.36 | 11 | 0.48 | 13 | 0.53 | 17 | 0.50 | 21 |
| Sweden | 8.11 | 17 | 1.87 | 8 | 0.77 | 11 | 0.42 | 11 | 0.52 | 6 | 0.50 | 22 | 0.44 | 20 | 0.50 | 18 |
| Tanzania | 8.72 | 3 | 2.32 | 18 | 0.84 | 5 | 0.37 | 6 | 0.27 | 17 | 0.45 | 8 | 0.34 | 21 | 0.47 | 8 |
| Turkey | 7.89 | 18 | 2.62 | 21 | 0.41 | 23 | 0.49 | 21 | 0.31 | 15 | 0.46 | 10 | 0.61 | 12 | 0.49 | 15 |
| United Kingdom | 8.14 | 16 | 1.98 | 11 | 0.72 | 18 | 0.45 | 18 | 0.61 | 2 | 0.49 | 16 | 0.56 | 15 | 0.50 | 20 |
| United States | 8.56 | 8 | 1.71 | 2 | 0.78 | 7 | 0.41 | 8 | 0.49 | 8 | 0.50 | 23 | 0.59 | 13 | 0.49 | 16 |

|  | Character and prosocial behavior | | | | Physical health & health behavior | | | | | | | | | | | |
| --- | --- | --- | --- | --- | --- | --- | --- | --- | --- | --- | --- | --- | --- | --- | --- | --- |
|  | **Volunteering** | | | | **Self-rated**  **physical health** | | | | **Health problems** | | | | **Pain in**  **past 4 weeks** | | | |
| Country | **Mean** | **Rank** | **St dev** | **Rank** | **Mean** | **Rank** | **St dev** | **Rank** | **Mean** | **Rank** | **St dev** | **Rank** | **Mean** | **Rank** | **St dev** | **Rank** |
| Argentina | 0.21 | 12 | 0.41 | 10 | 7.26 | 10 | 2.19 | 14 | 0.19 | 11 | 0.39 | 11 | 0.44 | 12 | 0.50 | 14 |
| Australia | 0.34 | 6 | 0.47 | 18 | 6.49 | 20 | 2.06 | 8 | 0.28 | 20 | 0.45 | 19 | 0.56 | 21 | 0.50 | 15 |
| Brazil | 0.19 | 16 | 0.39 | 8 | 7.16 | 12 | 2.31 | 17 | 0.19 | 12 | 0.40 | 12 | 0.59 | 22 | 0.49 | 11 |
| China | 0.34 | 5 | 0.47 | 19 | 7.24 | 11 | 1.79 | 1 | 0.15 | 7 | 0.36 | 7 | 0.29 | 2 | 0.45 | 3 |
| Egypt | 0.04 | 23 | 0.21 | 1 | 6.81 | 17 | 2.81 | 21 | 0.25 | 17 | 0.44 | 17 | 0.60 | 23 | 0.49 | 9 |
| Germany | 0.21 | 15 | 0.41 | 11 | 6.62 | 19 | 2.10 | 12 | 0.30 | 21 | 0.46 | 21 | 0.41 | 10 | 0.49 | 12 |
| Hong Kong | 0.35 | 4 | 0.48 | 20 | 7.12 | 13 | 1.99 | 7 | 0.21 | 14 | 0.41 | 14 | 0.45 | 14 | 0.50 | 17 |
| India | 0.29 | 8 | 0.46 | 16 | 7.00 | 14 | 3.42 | 23 | 0.28 | 19 | 0.45 | 20 | 0.50 | 16 | 0.50 | 20 |
| Indonesia | 0.46 | 2 | 0.50 | 22 | 8.29 | 1 | 1.98 | 6 | 0.15 | 5 | 0.36 | 6 | 0.34 | 6 | 0.48 | 6 |
| Israel | 0.21 | 13 | 0.40 | 9 | 8.08 | 3 | 1.89 | 2 | 0.14 | 3 | 0.35 | 3 | 0.25 | 1 | 0.43 | 1 |
| Japan | 0.09 | 21 | 0.28 | 3 | 5.97 | 23 | 2.09 | 11 | 0.18 | 10 | 0.38 | 10 | 0.33 | 5 | 0.47 | 5 |
| Kenya | 0.40 | 3 | 0.49 | 21 | 8.06 | 4 | 2.66 | 18 | 0.15 | 6 | 0.36 | 5 | 0.45 | 13 | 0.50 | 16 |
| Mexico | 0.21 | 14 | 0.41 | 12 | 7.79 | 5 | 1.96 | 5 | 0.17 | 9 | 0.38 | 9 | 0.38 | 7 | 0.49 | 7 |
| Nigeria | 0.51 | 1 | 0.50 | 23 | 8.27 | 2 | 2.20 | 15 | 0.14 | 2 | 0.35 | 4 | 0.39 | 8 | 0.49 | 8 |
| Philippines | 0.25 | 10 | 0.44 | 14 | 7.69 | 7 | 2.14 | 13 | 0.34 | 23 | 0.48 | 23 | 0.43 | 11 | 0.50 | 13 |
| Poland | 0.08 | 22 | 0.28 | 2 | 7.68 | 8 | 1.90 | 3 | 0.13 | 1 | 0.34 | 1 | 0.32 | 4 | 0.47 | 4 |
| South Africa | 0.25 | 11 | 0.43 | 13 | 7.52 | 9 | 2.72 | 19 | 0.22 | 15 | 0.41 | 15 | 0.29 | 3 | 0.45 | 2 |
| Spain | 0.17 | 17 | 0.38 | 7 | 6.84 | 15 | 2.07 | 10 | 0.20 | 13 | 0.40 | 13 | 0.47 | 15 | 0.50 | 18 |
| Sweden | 0.11 | 19 | 0.32 | 5 | 6.41 | 21 | 2.07 | 9 | 0.26 | 18 | 0.44 | 18 | 0.40 | 9 | 0.49 | 10 |
| Tanzania | 0.11 | 20 | 0.31 | 4 | 7.78 | 6 | 3.02 | 22 | 0.16 | 8 | 0.37 | 8 | 0.52 | 18 | 0.50 | 21 |
| Turkey | 0.15 | 18 | 0.36 | 6 | 6.70 | 18 | 2.72 | 20 | 0.14 | 4 | 0.34 | 2 | 0.53 | 19 | 0.50 | 22 |
| United Kingdom | 0.30 | 7 | 0.46 | 17 | 6.37 | 22 | 2.29 | 16 | 0.31 | 22 | 0.46 | 22 | 0.53 | 20 | 0.50 | 19 |
| United States | 0.27 | 9 | 0.45 | 15 | 6.81 | 16 | 1.93 | 4 | 0.24 | 16 | 0.43 | 16 | 0.51 | 17 | 0.50 | 23 |

|  | Physical health & health behavior | | | | | | | | | | | | Socioeconomic outcomes | | | |
| --- | --- | --- | --- | --- | --- | --- | --- | --- | --- | --- | --- | --- | --- | --- | --- | --- |
|  | **Daily smoker** | | | | **Number of**  **drinks per week** | | | | **Days exercise**  **per week** | | | | **Financial security** | | | |
| Country | **Mean** | **Rank** | **St dev** | **Rank** | **Mean** | **Rank** | **St dev** | **Rank** | **Mean** | **Rank** | **St dev** | **Rank** | **Mean** | **Rank** | **St dev** | **Rank** |
| Argentina | 0.33 | 21 | 0.47 | 21 | 1.51 | 12 | 3.54 | 6 | 1.96 | 20 | 2.33 | 10 | 3.95 | 23 | 3.66 | 19 |
| Australia | 0.12 | 7 | 0.32 | 7 | 4.61 | 23 | 8.31 | 21 | 2.68 | 9 | 2.27 | 9 | 6.69 | 6 | 2.99 | 8 |
| Brazil | 0.20 | 9 | 0.40 | 9 | 1.96 | 14 | 5.67 | 16 | 2.16 | 18 | 2.43 | 13 | 4.02 | 22 | 3.79 | 21 |
| China | 0.27 | 16 | 0.44 | 17 | 1.46 | 11 | 3.73 | 9 | 2.71 | 8 | 2.06 | 4 | 6.89 | 4 | 2.38 | 2 |
| Egypt | 0.22 | 12 | 0.42 | 12 | 0.01 | 1 | 0.21 | 1 | 0.70 | 23 | 1.70 | 2 | 5.26 | 14 | 3.44 | 16 |
| Germany | 0.27 | 17 | 0.44 | 16 | 3.89 | 21 | 8.95 | 23 | 2.38 | 15 | 2.15 | 5 | 6.23 | 8 | 2.96 | 6 |
| Hong Kong | 0.31 | 19 | 0.46 | 19 | 1.66 | 13 | 2.87 | 4 | 2.24 | 17 | 2.17 | 6 | 6.79 | 5 | 2.68 | 4 |
| India | 0.08 | 4 | 0.27 | 4 | 0.36 | 3 | 4.25 | 13 | 3.14 | 3 | 3.19 | 23 | 4.11 | 21 | 4.08 | 23 |
| Indonesia | 0.38 | 22 | 0.49 | 22 | 0.15 | 2 | 1.66 | 2 | 2.96 | 5 | 2.76 | 20 | 6.08 | 9 | 3.40 | 15 |
| Israel | 0.23 | 13 | 0.42 | 14 | 1.25 | 9 | 3.94 | 10 | 1.29 | 22 | 1.64 | 1 | 7.16 | 2 | 2.49 | 3 |
| Japan | 0.22 | 10 | 0.42 | 11 | 3.13 | 19 | 7.23 | 19 | 2.04 | 19 | 2.45 | 15 | 5.55 | 12 | 2.97 | 7 |
| Kenya | 0.05 | 3 | 0.23 | 3 | 0.42 | 4 | 2.82 | 3 | 2.64 | 11 | 2.70 | 18 | 4.76 | 18 | 3.80 | 22 |
| Mexico | 0.23 | 14 | 0.42 | 13 | 1.38 | 10 | 3.54 | 5 | 2.45 | 14 | 2.54 | 16 | 4.88 | 17 | 3.65 | 18 |
| Nigeria | 0.04 | 1 | 0.21 | 2 | 0.55 | 6 | 3.56 | 8 | 3.01 | 4 | 2.59 | 17 | 5.00 | 16 | 3.15 | 11 |
| Philippines | 0.22 | 11 | 0.41 | 10 | 0.97 | 7 | 4.21 | 12 | 3.82 | 1 | 2.84 | 22 | 5.38 | 13 | 3.30 | 14 |
| Poland | 0.30 | 18 | 0.46 | 18 | 2.01 | 15 | 3.56 | 7 | 1.39 | 21 | 1.87 | 3 | 6.98 | 3 | 2.37 | 1 |
| South Africa | 0.24 | 15 | 0.43 | 15 | 2.44 | 16 | 6.07 | 18 | 2.34 | 16 | 2.45 | 14 | 5.22 | 15 | 3.25 | 12 |
| Spain | 0.32 | 20 | 0.47 | 20 | 3.47 | 20 | 7.40 | 20 | 2.68 | 10 | 2.36 | 11 | 4.70 | 19 | 3.25 | 13 |
| Sweden | 0.10 | 5 | 0.29 | 5 | 2.88 | 18 | 4.61 | 14 | 2.77 | 7 | 2.26 | 8 | 7.23 | 1 | 2.79 | 5 |
| Tanzania | 0.04 | 2 | 0.20 | 1 | 0.47 | 5 | 4.04 | 11 | 3.26 | 2 | 2.73 | 19 | 5.67 | 11 | 3.71 | 20 |
| Turkey | 0.53 | 23 | 0.50 | 23 | 1.16 | 8 | 5.19 | 15 | 2.81 | 6 | 2.79 | 21 | 4.65 | 20 | 3.54 | 17 |
| United Kingdom | 0.16 | 8 | 0.37 | 8 | 4.13 | 22 | 8.43 | 22 | 2.55 | 13 | 2.37 | 12 | 6.07 | 10 | 3.03 | 9 |
| United States | 0.10 | 6 | 0.31 | 6 | 2.69 | 17 | 5.84 | 17 | 2.58 | 12 | 2.25 | 7 | 6.49 | 7 | 3.10 | 10 |

|  | Socioeconomic outcomes | | | | | | | | | | | | | | | |
| --- | --- | --- | --- | --- | --- | --- | --- | --- | --- | --- | --- | --- | --- | --- | --- | --- |
|  | **Material security** | | | | **Educational**  **attainment (16+** | | | | **Currently**  **employed** | | | | **Financially comfortable**  **/ getting by** | | | |
| Country | **Mean** | **Rank** | **St dev** | **Rank** | **Mean** | **Rank** | **St dev** | **Rank** | **Mean** | **Rank** | **St dev** | **Rank** | **Mean** | **Rank** | **St dev** | **Rank** |
| Argentina | 3.79 | 23 | 3.73 | 18 | 0.09 | 16 | 0.29 | 8 | 0.62 | 5 | 0.48 | 6 | 0.48 | 21 | 0.50 | 17 |
| Australia | 7.28 | 3 | 2.78 | 7 | 0.35 | 3 | 0.48 | 21 | 0.59 | 12 | 0.49 | 13 | 0.84 | 2 | 0.37 | 2 |
| Brazil | 3.91 | 22 | 3.88 | 22 | 0.18 | 13 | 0.39 | 11 | 0.51 | 17 | 0.50 | 21 | 0.61 | 13 | 0.49 | 14 |
| China | 7.02 | 5 | 2.33 | 1 | 0.10 | 15 | 0.30 | 9 | 0.64 | 3 | 0.48 | 3 | 0.80 | 5 | 0.40 | 5 |
| Egypt | 6.22 | 11 | 3.43 | 15 | 0.14 | 14 | 0.34 | 10 | 0.46 | 20 | 0.50 | 16 | 0.58 | 14 | 0.49 | 16 |
| Germany | 6.80 | 8 | 2.78 | 8 | 0.33 | 5 | 0.47 | 19 | 0.60 | 11 | 0.49 | 12 | 0.79 | 9 | 0.41 | 8 |
| Hong Kong | 6.94 | 7 | 2.38 | 2 | 0.18 | 12 | 0.39 | 12 | 0.77 | 1 | 0.42 | 1 | 0.82 | 3 | 0.39 | 3 |
| India | 3.98 | 21 | 4.13 | 23 | 0.06 | 21 | 0.24 | 4 | 0.48 | 19 | 0.50 | 19 | 0.50 | 18 | 0.50 | 18 |
| Indonesia | 6.46 | 10 | 3.44 | 16 | 0.06 | 20 | 0.24 | 3 | 0.50 | 18 | 0.50 | 22 | 0.80 | 6 | 0.40 | 6 |
| Israel | 7.24 | 4 | 2.53 | 4 | 0.52 | 1 | 0.50 | 23 | 0.61 | 6 | 0.49 | 10 | 0.75 | 11 | 0.43 | 11 |
| Japan | 5.86 | 13 | 2.66 | 6 | 0.25 | 8 | 0.43 | 16 | 0.61 | 9 | 0.49 | 7 | 0.79 | 8 | 0.41 | 9 |
| Kenya | 4.94 | 19 | 3.84 | 21 | 0.07 | 19 | 0.25 | 5 | 0.45 | 22 | 0.50 | 15 | 0.26 | 23 | 0.44 | 12 |
| Mexico | 4.84 | 20 | 3.78 | 20 | 0.23 | 9 | 0.42 | 15 | 0.53 | 15 | 0.50 | 20 | 0.50 | 17 | 0.50 | 19 |
| Nigeria | 5.24 | 17 | 3.20 | 11 | 0.02 | 22 | 0.14 | 2 | 0.67 | 2 | 0.47 | 2 | 0.39 | 22 | 0.49 | 15 |
| Philippines | 6.00 | 12 | 3.27 | 13 | 0.07 | 17 | 0.26 | 7 | 0.52 | 16 | 0.50 | 23 | 0.49 | 19 | 0.50 | 20 |
| Poland | 7.33 | 2 | 2.38 | 3 | 0.29 | 6 | 0.45 | 18 | 0.63 | 4 | 0.48 | 4 | 0.79 | 7 | 0.41 | 7 |
| South Africa | 5.55 | 15 | 3.41 | 14 | 0.07 | 18 | 0.25 | 6 | 0.37 | 23 | 0.48 | 5 | 0.49 | 20 | 0.50 | 21 |
| Spain | 4.98 | 18 | 3.27 | 12 | 0.21 | 11 | 0.41 | 13 | 0.55 | 14 | 0.50 | 17 | 0.63 | 12 | 0.48 | 13 |
| Sweden | 7.50 | 1 | 2.57 | 5 | 0.27 | 7 | 0.44 | 17 | 0.61 | 8 | 0.49 | 8 | 0.95 | 1 | 0.23 | 1 |
| Tanzania | 5.85 | 14 | 3.73 | 19 | 0.01 | 23 | 0.12 | 1 | 0.57 | 13 | 0.50 | 14 | 0.50 | 16 | 0.50 | 22 |
| Turkey | 5.28 | 16 | 3.60 | 17 | 0.22 | 10 | 0.42 | 14 | 0.45 | 21 | 0.50 | 18 | 0.52 | 15 | 0.50 | 23 |
| United Kingdom | 6.60 | 9 | 2.85 | 9 | 0.37 | 2 | 0.48 | 22 | 0.61 | 7 | 0.49 | 9 | 0.77 | 10 | 0.42 | 10 |
| United States | 7.02 | 6 | 2.93 | 10 | 0.33 | 4 | 0.47 | 20 | 0.60 | 10 | 0.49 | 11 | 0.81 | 4 | 0.40 | 4 |

|  | Socioeconomic outcomes | | | | Religion and spirituality | | | | | | | | | | | |
| --- | --- | --- | --- | --- | --- | --- | --- | --- | --- | --- | --- | --- | --- | --- | --- | --- |
|  | **Own home** | | | | **Religious/spiritual**  **connection** | | | | **Belief in life**  **after death** | | | | **Transformative**  **religious experience** | | | |
| Country | **Mean** | **Rank** | **St dev** | **Rank** | **Mean** | **Rank** | **St dev** | **Rank** | **Mean** | **Rank** | **St dev** | **Rank** | **Mean** | **Rank** | **St dev** | **Rank** |
| Argentina | 0.59 | 18 | 0.49 | 18 | 0.60 | 13 | 0.49 | 18 | 0.58 | 9 | 0.49 | 16 | 0.40 | 11 | 0.49 | 16 |
| Australia | 0.69 | 9 | 0.46 | 9 | 0.37 | 19 | 0.48 | 15 | 0.36 | 19 | 0.48 | 10 | 0.25 | 15 | 0.43 | 9 |
| Brazil | 0.59 | 17 | 0.49 | 17 | 0.77 | 7 | 0.42 | 7 | 0.61 | 7 | 0.49 | 11 | 0.60 | 5 | 0.49 | 19 |
| China | 0.84 | 1 | 0.37 | 1 | 0.23 | 22 | 0.42 | 9 | 0.24 | 22 | 0.43 | 3 | 0.23 | 17 | 0.42 | 7 |
| Egypt | 0.74 | 4 | 0.44 | 4 | 0.91 | 1 | 0.29 | 1 | 0.64 | 5 | 0.48 | 9 | 0.35 | 13 | 0.48 | 12 |
| Germany | 0.49 | 22 | 0.50 | 22 | 0.37 | 20 | 0.48 | 16 | 0.34 | 20 | 0.48 | 8 | 0.21 | 20 | 0.41 | 5 |
| Hong Kong | 0.67 | 10 | 0.47 | 11 | 0.46 | 16 | 0.50 | 23 | 0.45 | 16 | 0.50 | 19 | 0.42 | 10 | 0.49 | 20 |
| India | 0.82 | 2 | 0.38 | 2 | 0.72 | 8 | 0.45 | 11 | 0.48 | 15 | 0.50 | 23 | 0.58 | 7 | 0.49 | 21 |
| Indonesia | 0.66 | 12 | 0.47 | 12 | 0.87 | 3 | 0.33 | 3 | 0.95 | 1 | 0.22 | 1 | 0.55 | 8 | 0.50 | 23 |
| Israel | 0.67 | 11 | 0.47 | 10 | 0.63 | 12 | 0.48 | 17 | 0.55 | 12 | 0.50 | 20 | 0.23 | 16 | 0.42 | 8 |
| Japan | 0.56 | 20 | 0.50 | 20 | 0.23 | 23 | 0.42 | 8 | 0.21 | 23 | 0.40 | 2 | 0.08 | 23 | 0.27 | 1 |
| Kenya | 0.55 | 21 | 0.50 | 21 | 0.81 | 6 | 0.40 | 6 | 0.72 | 3 | 0.45 | 5 | 0.65 | 2 | 0.48 | 13 |
| Mexico | 0.61 | 16 | 0.49 | 15 | 0.67 | 9 | 0.47 | 12 | 0.60 | 8 | 0.49 | 14 | 0.45 | 9 | 0.50 | 22 |
| Nigeria | 0.49 | 23 | 0.50 | 23 | 0.89 | 2 | 0.31 | 2 | 0.73 | 2 | 0.44 | 4 | 0.60 | 4 | 0.49 | 17 |
| Philippines | 0.62 | 14 | 0.49 | 14 | 0.64 | 11 | 0.48 | 14 | 0.54 | 13 | 0.50 | 21 | 0.62 | 3 | 0.49 | 15 |
| Poland | 0.75 | 3 | 0.43 | 3 | 0.56 | 15 | 0.50 | 22 | 0.57 | 10 | 0.50 | 17 | 0.08 | 22 | 0.28 | 2 |
| South Africa | 0.72 | 6 | 0.45 | 6 | 0.85 | 4 | 0.36 | 4 | 0.53 | 14 | 0.50 | 22 | 0.60 | 6 | 0.49 | 18 |
| Spain | 0.61 | 15 | 0.49 | 16 | 0.43 | 17 | 0.50 | 21 | 0.40 | 17 | 0.49 | 15 | 0.21 | 19 | 0.41 | 4 |
| Sweden | 0.71 | 7 | 0.46 | 8 | 0.26 | 21 | 0.44 | 10 | 0.29 | 21 | 0.46 | 6 | 0.13 | 21 | 0.34 | 3 |
| Tanzania | 0.72 | 5 | 0.45 | 5 | 0.81 | 5 | 0.39 | 5 | 0.61 | 6 | 0.49 | 12 | 0.69 | 1 | 0.46 | 11 |
| Turkey | 0.57 | 19 | 0.50 | 19 | 0.65 | 10 | 0.48 | 13 | 0.67 | 4 | 0.47 | 7 | 0.29 | 14 | 0.46 | 10 |
| United Kingdom | 0.63 | 13 | 0.48 | 13 | 0.41 | 18 | 0.49 | 19 | 0.39 | 18 | 0.49 | 13 | 0.22 | 18 | 0.41 | 6 |
| United States | 0.71 | 8 | 0.45 | 7 | 0.58 | 14 | 0.49 | 20 | 0.56 | 11 | 0.50 | 18 | 0.36 | 12 | 0.48 | 14 |

|  | Religion and spirituality | | | | | | | | | | | | | | | |
| --- | --- | --- | --- | --- | --- | --- | --- | --- | --- | --- | --- | --- | --- | --- | --- | --- |
|  | **Religious reading**  **or listening** | | | | **Prayer or**  **meditation** | | | | **Belief in God/**  **gods/spiritual forces** | | | | **Religious**  **centrality** | | | |
| Country | **Mean** | **Rank** | **St dev** | **Rank** | **Mean** | **Rank** | **St dev** | **Rank** | **Mean** | **Rank** | **St dev** | **Rank** | **Mean** | **Rank** | **St dev** | **Rank** |
| Argentina | 0.20 | 15 | 0.40 | 9 | 0.37 | 14 | 0.48 | 21 | 0.84 | 12 | 0.36 | 12 | 0.46 | 12 | 0.50 | 22 |
| Australia | 0.10 | 18 | 0.31 | 6 | 0.21 | 19 | 0.41 | 9 | 0.54 | 19 | 0.50 | 23 | 0.26 | 19 | 0.44 | 12 |
| Brazil | 0.39 | 6 | 0.49 | 21 | 0.65 | 9 | 0.48 | 19 | 0.96 | 6 | 0.20 | 6 | 0.65 | 10 | 0.48 | 18 |
| China | 0.06 | 21 | 0.24 | 3 | 0.09 | 23 | 0.29 | 2 | 0.34 | 22 | 0.47 | 17 | 0.13 | 22 | 0.34 | 7 |
| Egypt | 0.58 | 5 | 0.49 | 23 | 0.80 | 4 | 0.40 | 8 | 1.00 | 1 | 0.02 | 1 | 0.90 | 3 | 0.30 | 4 |
| Germany | 0.07 | 20 | 0.26 | 4 | 0.17 | 20 | 0.38 | 7 | 0.55 | 18 | 0.50 | 21 | 0.18 | 20 | 0.38 | 9 |
| Hong Kong | 0.26 | 12 | 0.44 | 13 | 0.30 | 15 | 0.46 | 16 | 0.59 | 17 | 0.49 | 19 | 0.32 | 16 | 0.47 | 17 |
| India | 0.36 | 8 | 0.48 | 18 | 0.65 | 10 | 0.48 | 18 | 0.95 | 8 | 0.21 | 8 | 0.86 | 5 | 0.35 | 8 |
| Indonesia | 0.59 | 4 | 0.49 | 22 | 0.84 | 3 | 0.36 | 5 | 0.97 | 5 | 0.17 | 5 | 0.94 | 1 | 0.24 | 1 |
| Israel | 0.29 | 10 | 0.46 | 14 | 0.37 | 13 | 0.48 | 20 | 0.72 | 15 | 0.45 | 16 | 0.46 | 13 | 0.50 | 23 |
| Japan | 0.04 | 23 | 0.19 | 1 | 0.10 | 22 | 0.30 | 3 | 0.20 | 23 | 0.40 | 14 | 0.07 | 23 | 0.26 | 2 |
| Kenya | 0.65 | 2 | 0.48 | 17 | 0.84 | 2 | 0.36 | 6 | 0.98 | 4 | 0.12 | 3 | 0.81 | 6 | 0.39 | 10 |
| Mexico | 0.23 | 13 | 0.42 | 11 | 0.48 | 11 | 0.50 | 23 | 0.91 | 10 | 0.28 | 10 | 0.55 | 11 | 0.50 | 21 |
| Nigeria | 0.63 | 3 | 0.48 | 19 | 0.92 | 1 | 0.28 | 1 | 0.99 | 2 | 0.07 | 2 | 0.89 | 4 | 0.31 | 5 |
| Philippines | 0.26 | 11 | 0.44 | 12 | 0.71 | 7 | 0.45 | 14 | 0.93 | 9 | 0.26 | 9 | 0.74 | 8 | 0.44 | 13 |
| Poland | 0.08 | 19 | 0.27 | 5 | 0.28 | 16 | 0.45 | 13 | 0.83 | 13 | 0.38 | 13 | 0.44 | 14 | 0.50 | 19 |
| South Africa | 0.35 | 9 | 0.48 | 16 | 0.71 | 6 | 0.45 | 15 | 0.96 | 7 | 0.20 | 7 | 0.78 | 7 | 0.41 | 11 |
| Spain | 0.12 | 17 | 0.32 | 7 | 0.26 | 17 | 0.44 | 12 | 0.64 | 16 | 0.48 | 18 | 0.27 | 18 | 0.44 | 14 |
| Sweden | 0.05 | 22 | 0.21 | 2 | 0.11 | 21 | 0.32 | 4 | 0.44 | 21 | 0.50 | 20 | 0.13 | 21 | 0.33 | 6 |
| Tanzania | 0.70 | 1 | 0.46 | 15 | 0.76 | 5 | 0.43 | 11 | 0.98 | 3 | 0.13 | 4 | 0.91 | 2 | 0.29 | 3 |
| Turkey | 0.38 | 7 | 0.49 | 20 | 0.69 | 8 | 0.46 | 17 | 0.85 | 11 | 0.35 | 11 | 0.71 | 9 | 0.45 | 16 |
| United Kingdom | 0.13 | 16 | 0.34 | 8 | 0.24 | 18 | 0.43 | 10 | 0.54 | 20 | 0.50 | 22 | 0.28 | 17 | 0.45 | 15 |
| United States | 0.21 | 14 | 0.41 | 10 | 0.42 | 12 | 0.49 | 22 | 0.73 | 14 | 0.45 | 15 | 0.44 | 15 | 0.50 | 20 |

|  | Religion and spirituality | | | | | | | | | | | | | | | |
| --- | --- | --- | --- | --- | --- | --- | --- | --- | --- | --- | --- | --- | --- | --- | --- | --- |
|  | **Religious/spiritual**  **comfort** | | | | **Feel loved**  **by God** | | | | **Feel punished**  **by God** | | | | **Experienced**  **religious criticism** | | | |
| Country | **Mean** | **Rank** | **St dev** | **Rank** | **Mean** | **Rank** | **St dev** | **Rank** | **Mean** | **Rank** | **St dev** | **Rank** | **Mean** | **Rank** | **St dev** | **Rank** |
| Argentina | 0.58 | 13 | 0.49 | 21 | 0.68 | 12 | 0.47 | 19 | 0.14 | 9 | 0.35 | 10 | 0.15 | 11 | 0.35 | 11 |
| Australia | 0.33 | 19 | 0.47 | 15 | 0.29 | 19 | 0.46 | 16 | 0.04 | 2 | 0.20 | 2 | 0.05 | 4 | 0.21 | 4 |
| Brazil | 0.79 | 9 | 0.41 | 11 | 0.87 | 9 | 0.33 | 10 | 0.18 | 12 | 0.39 | 13 | 0.17 | 12 | 0.38 | 13 |
| China | 0.16 | 22 | 0.36 | 9 | 0.14 | 22 | 0.34 | 11 | 0.08 | 5 | 0.27 | 5 | 0.05 | 5 | 0.21 | 5 |
| Egypt | 0.98 | 1 | 0.15 | 1 | 0.98 | 1 | 0.13 | 1 | 0.88 | 23 | 0.33 | 9 | 0.28 | 16 | 0.45 | 16 |
| Germany | 0.27 | 20 | 0.44 | 14 | 0.27 | 20 | 0.44 | 15 | 0.07 | 4 | 0.25 | 4 | 0.04 | 3 | 0.20 | 3 |
| Hong Kong | 0.36 | 17 | 0.48 | 18 | 0.31 | 18 | 0.46 | 17 | 0.22 | 14 | 0.41 | 15 | 0.17 | 13 | 0.38 | 12 |
| India | 0.89 | 5 | 0.32 | 6 | 0.91 | 7 | 0.29 | 8 | 0.63 | 22 | 0.48 | 20 | 0.62 | 23 | 0.49 | 19 |
| Indonesia | 0.96 | 2 | 0.19 | 2 | 0.91 | 6 | 0.29 | 6 | 0.28 | 16 | 0.45 | 17 | 0.18 | 14 | 0.38 | 14 |
| Israel | 0.60 | 12 | 0.49 | 20 | 0.58 | 13 | 0.49 | 21 | 0.20 | 13 | 0.40 | 14 | 0.11 | 9 | 0.31 | 9 |
| Japan | 0.07 | 23 | 0.26 | 5 | 0.11 | 23 | 0.31 | 9 | 0.03 | 1 | 0.16 | 1 | 0.01 | 1 | 0.11 | 1 |
| Kenya | 0.88 | 6 | 0.33 | 7 | 0.93 | 4 | 0.26 | 4 | 0.43 | 20 | 0.50 | 22 | 0.52 | 22 | 0.50 | 22 |
| Mexico | 0.67 | 11 | 0.47 | 16 | 0.78 | 10 | 0.41 | 13 | 0.15 | 10 | 0.36 | 11 | 0.23 | 15 | 0.42 | 15 |
| Nigeria | 0.94 | 4 | 0.25 | 4 | 0.95 | 3 | 0.23 | 3 | 0.26 | 15 | 0.44 | 16 | 0.49 | 21 | 0.50 | 23 |
| Philippines | 0.80 | 8 | 0.40 | 10 | 0.91 | 8 | 0.29 | 7 | 0.45 | 21 | 0.50 | 23 | 0.34 | 17 | 0.47 | 17 |
| Poland | 0.48 | 15 | 0.50 | 23 | 0.48 | 15 | 0.50 | 23 | 0.17 | 11 | 0.38 | 12 | 0.13 | 10 | 0.33 | 10 |
| South Africa | 0.87 | 7 | 0.33 | 8 | 0.92 | 5 | 0.28 | 5 | 0.41 | 19 | 0.49 | 21 | 0.39 | 19 | 0.49 | 20 |
| Spain | 0.37 | 16 | 0.48 | 19 | 0.36 | 16 | 0.48 | 20 | 0.09 | 7 | 0.29 | 7 | 0.06 | 6 | 0.24 | 6 |
| Sweden | 0.22 | 21 | 0.41 | 12 | 0.18 | 21 | 0.39 | 12 | 0.04 | 3 | 0.20 | 3 | 0.02 | 2 | 0.15 | 2 |
| Tanzania | 0.95 | 3 | 0.22 | 3 | 0.97 | 2 | 0.16 | 2 | 0.35 | 18 | 0.48 | 19 | 0.46 | 20 | 0.50 | 21 |
| Turkey | 0.77 | 10 | 0.42 | 13 | 0.76 | 11 | 0.43 | 14 | 0.31 | 17 | 0.46 | 18 | 0.37 | 18 | 0.48 | 18 |
| United Kingdom | 0.34 | 18 | 0.47 | 17 | 0.32 | 17 | 0.47 | 18 | 0.10 | 8 | 0.30 | 8 | 0.08 | 8 | 0.27 | 8 |
| United States | 0.57 | 14 | 0.50 | 22 | 0.55 | 14 | 0.50 | 22 | 0.09 | 6 | 0.28 | 6 | 0.08 | 7 | 0.27 | 7 |

|  | Religion and spirituality | | | |
| --- | --- | --- | --- | --- |
|  | **Faith-sharing** | | | |
| Country | **Mean** | **Rank** | **St dev** | **Rank** |
| Argentina | 0.50 | 10 | 0.50 | 23 |
| Australia | 0.23 | 18 | 0.42 | 7 |
| Brazil | 0.62 | 6 | 0.49 | 16 |
| China | 0.12 | 22 | 0.32 | 2 |
| Egypt | 0.41 | 13 | 0.49 | 18 |
| Germany | 0.21 | 20 | 0.41 | 6 |
| Hong Kong | 0.32 | 15 | 0.47 | 14 |
| India | 0.70 | 5 | 0.46 | 12 |
| Indonesia | 0.55 | 9 | 0.50 | 20 |
| Israel | 0.47 | 11 | 0.50 | 21 |
| Japan | 0.04 | 23 | 0.19 | 1 |
| Kenya | 0.81 | 2 | 0.39 | 4 |
| Mexico | 0.47 | 12 | 0.50 | 22 |
| Nigeria | 0.76 | 3 | 0.42 | 9 |
| Philippines | 0.56 | 8 | 0.50 | 19 |
| Poland | 0.30 | 16 | 0.46 | 13 |
| South Africa | 0.72 | 4 | 0.45 | 11 |
| Spain | 0.26 | 17 | 0.44 | 10 |
| Sweden | 0.19 | 21 | 0.39 | 5 |
| Tanzania | 0.83 | 1 | 0.37 | 3 |
| Turkey | 0.60 | 7 | 0.49 | 17 |
| United Kingdom | 0.23 | 19 | 0.42 | 8 |
| United States | 0.37 | 14 | 0.48 | 15 |

## Supplementary Table 4. All Objective Indicators – GFS Countries Ranked

|  | Geography | | | | | | | | | Climate/Weather | | | | | |
| --- | --- | --- | --- | --- | --- | --- | --- | --- | --- | --- | --- | --- | --- | --- | --- |
| **Altitude**  *ranking = neutral* | | | **Latitude**  *ranking = neutral* | | | **Surface Area**  Total in sq km  *ranking = neutral* | | | **Climate Risk Index**  *higher score = worse*  *higher rank = better* | | | **Temperature**  Average annual F.  *ranking = neutral* | | |
| **Country** | **Data** | **Global Rank** | **Country** | **Data** | **Global Rank** | **Country** | **Data** | **Global Rank** | **Country** | **Data** | **Global Rank** | **Country** | **Data** | **Global Rank** |
| Global Top | Bhutan | 10761.15 | 1 | Greenland | 71.71 | 1 | Russia | 17098250 | 1 | U.A.E. | 0.00 | 1 | Burkina Faso | 82.85 | 1 |
| Global Median | New Zealand | 1272.96 | 108 | Oman | 21.51 | 108 | Iceland | 103000 | 108 | Bhutan | 4.51 | 85 | Uganda | 73.04 | 108 |
| Global Bottom | Maldives | 4.92 | 217 | Kenya | 0.02 | 217 | Gibraltar | 10 | 217 | Dominica | 56.71 | 169 | Canada | 22.37 | 217 |
|  |  |  |  |  |  |  |  |  |  |  |  |  |  |  |  |
| 1 | China | 6036.75 | 9 | Sweden | 60.13 | 7 | United States | 9831510 | 3 | Egypt | 0.22 | 14 | Nigeria | 80.24 | 32 |
| 2 | Turkey | 3743.44 | 23 | United Kingdom | 55.38 | 12 | China | 9562910 | 4 | Sweden | 0.37 | 16 | Hong Kong | 78.80 | 46 |
| 3 | Mexico | 3645.01 | 28 | Poland | 51.92 | 18 | Brazil | 8510418 | 5 | Turkey | 0.60 | 20 | Indonesia | 78.53 | 52 |
| 4 | South Africa | 3392.39 | 32 | Germany | 51.17 | 19 | Australia | 7741220 | 8 | Argentina | 0.92 | 28 | Philippines | 78.53 | 50 |
| 5 | Tanzania | 3339.90 | 33 | Spain | 40.46 | 50 | India | 3287260 | 7 | Israel | 1.79 | 49 | Brazil | 76.91 | 78 |
| 6 | Kenya | 2500.00 | 47 | Turkey | 38.96 | 59 | Argentina | 2780400 | 6 | Japan | 1.96 | 50 | Kenya | 76.55 | 85 |
| 7 | United States | 2493.44 | 48 | Argentina | 38.42 | 61 | Mexico | 1964375 | 14 | Nigeria | 1.86 | 51 | India | 74.57 | 102 |
| 8 | Spain | 2165.35 | 60 | United States | 37.09 | 62 | Indonesia | 1916907 | 13 | Indonesia | 2.32 | 59 | Tanzania | 72.23 | 112 |
| 9 | India | 2037.40 | 62 | Japan | 36.20 | 63 | South Africa | 1219090 | 24 | Poland | 2.34 | 60 | Egypt | 71.78 | 116 |
| 10 | Argentina | 1952.10 | 64 | China | 35.86 | 67 | Egypt | 1001450 | 29 | Tanzania | 2.40 | 61 | Australia | 70.97 | 120 |
| 11 | Israel | 1666.67 | 74 | Israel | 31.05 | 80 | Tanzania | 947300 | 30 | Mexico | 2.47 | 62 | Mexico | 69.80 | 128 |
| 12 | Hong Kong | 1572.00 | 81 | South Africa | 30.56 | 81 | Nigeria | 923770 | 31 | Brazil | 3.27 | 71 | Israel | 66.56 | 135 |
| 13 | Philippines | 1450.13 | 96 | Egypt | 26.82 | 90 | Turkey | 785350 | 36 | Australia | 4.66 | 88 | South Africa | 63.95 | 143 |
| 14 | Japan | 1437.01 | 97 | Australia | 25.27 | 94 | Kenya | 580370 | 46 | South Africa | 5.05 | 94 | Argentina | 58.64 | 151 |
| 15 | Nigeria | 1246.72 | 113 | Mexico | 23.63 | 98 | Sweden | 528860 | 52 | UK | 6.90 | 111 | Spain | 55.94 | 154 |
| 16 | Indonesia | 1204.07 | 117 | Hong Kong | 22.40 | 102 | Spain | 505978 | 53 | Germany | 9.63 | 126 | Japan | 52.07 | 166 |
| 17 | Australia | 1082.68 | 124 | India | 20.59 | 113 | Japan | 377969 | 63 | Kenya | 11.46 | 133 | Turkey | 51.98 | 167 |
| 18 | Egypt | 1053.15 | 127 | Brazil | 14.24 | 147 | Germany | 357600 | 64 | United States | 16.78 | 157 | United States | 47.39 | 184 |
| 19 | Brazil | 1049.87 | 130 | Philippines | 12.88 | 158 | Poland | 312720 | 72 | Philippines | 18.75 | 160 | Germany | 47.30 | 185 |
| 20 | Sweden | 1049.87 | 131 | Nigeria | 9.08 | 177 | Philippines | 300000 | 73 | Spain | 19.81 | 162 | United Kingdom | 47.21 | 187 |
| 21 | Germany | 862.86 | 146 | Tanzania | 6.37 | 194 | United Kingdom | 243610 | 79 | India | 20.64 | 164 | Poland | 46.13 | 190 |
| 22 | Poland | 567.59 | 168 | Indonesia | 0.79 | 213 | Israel | 22070 | 149 | China | 31.32 | 168 | China | 44.51 | 196 |
| 23 | United Kingdom | 246.06 | 191 | Kenya | 0.02 | 217 | Hong Kong | 1110 | 178 | Hong Kong | - | - | Sweden | 35.78 | 209 |

|  | Climate/Weather | | | | | | Population | | | | | | | | |
| --- | --- | --- | --- | --- | --- | --- | --- | --- | --- | --- | --- | --- | --- | --- | --- |
| **Environmental Performance Index**  *higher score = better*  *higher rank = better* | | | **Air quality**  **PM2.5 (µg/m³)**  *higher score = worse*  *higher rank = better* | | | **Population Density**  People per sq. km of  land area  *ranking = neutral* | | | **Population Growth**  Annual %  *ranking = neutral* | | | **Population Ages 0-14**  % of total population  *ranking = neutral* | | |
| **Country** | **Data** | **Global Rank** | **Country** | **Data** | **Global Rank** | **Country** | **Data** | **Global Rank** | **Country** | **Data** | **Global Rank** | **Country** | **Data** | **Global Rank** |
| Global Top | Estonia | 75.7 | 1 | St Lucia | 2.10 | 1 | Macau | 20681.82 | 1 | Oman | 6.53 | 1 | C. African Rep. | 49.17 | 1 |
| Global Median | Thailand | 45.7 | 89 | Palau | 16.00 | 100 | Cambodia | 97.45 | 108 | C. African Rep. | 1.06 | 108 | Vietnam | 23.61 | 108 |
| Global Bottom | Vietnam | 24.6 | 179 | Chad | 91.80 | 200 | Greenland | 0.14 | 217 | Ukraine | -8.42 | 217 | Hong Kong | 10.70 | 217 |
|  |  |  |  |  |  |  |  |  |  |  |  |  |  |  |  |
| 1 | Germany | 74.5 | 3 | Australia | 4.50 | 14 | Hong Kong | 7060.10 | 4 | Tanzania | 2.90 | 21 | Tanzania | 42.72 | 14 |
| 2 | United Kingdom | 72.6 | 5 | Sweden | 5.30 | 17 | India | 479.43 | 25 | Hong Kong | 2.55 | 29 | Nigeria | 41.49 | 18 |
| 3 | Sweden | 70.3 | 8 | United States | 7.10 | 28 | Israel | 433.06 | 27 | Australia | 2.45 | 36 | Kenya | 37.45 | 43 |
| 4 | Poland | 64.2 | 22 | UK | 7.40 | 31 | Philippines | 382.21 | 30 | Nigeria | 2.10 | 53 | Egypt | 32.44 | 62 |
| 5 | Spain | 64 | 20 | Japan | 8.60 | 35 | Japan | 343.28 | 34 | Israel | 2.06 | 54 | Philippines | 28.61 | 81 |
| 6 | Australia | 63.1 | 23 | Argentina | 8.70 | 36 | United Kingdom | 280.21 | 44 | Kenya | 1.98 | 62 | Israel | 27.61 | 85 |
| 7 | Japan | 61.4 | 27 | Spain | 8.70 | 37 | Nigeria | 245.01 | 54 | Egypt | 1.69 | 71 | South Africa | 26.08 | 92 |
| 8 | United States | 57.2 | 35 | Germany | 9.00 | 41 | Germany | 239.86 | 56 | South Africa | 1.33 | 91 | India | 25.06 | 100 |
| 9 | Brazil | 53 | 48 | Kenya | 14.30 | 81 | China | 150.42 | 75 | Spain | 1.23 | 98 | Indonesia | 24.93 | 102 |
| 10 | Israel | 48 | 68 | Philippines | 14.80 | 87 | Indonesia | 147.33 | 78 | India | 0.88 | 120 | Mexico | 24.92 | 103 |
| 11 | Argentina | 47 | 80 | Poland | 14.80 | 88 | Poland | 120.30 | 91 | Mexico | 0.87 | 122 | Argentina | 22.19 | 114 |
| 12 | Mexico | 44.2 | 96 | Brazil | 14.90 | 90 | Egypt | 113.13 | 94 | Indonesia | 0.84 | 123 | Turkey | 21.84 | 115 |
| 13 | Egypt | 43.7 | 100 | Turkey | 15.30 | 98 | Turkey | 110.42 | 97 | United Kingdom | 0.82 | 126 | Brazil | 19.94 | 129 |
| 14 | Tanzania | 43.6 | 101 | Hong Kong | 16.30 | 102 | Spain | 95.57 | 110 | Philippines | 0.81 | 124 | Australia | 18.03 | 148 |
| 15 | South Africa | 42.7 | 105 | Israel | 17.20 | 110 | Kenya | 95.32 | 111 | United States | 0.49 | 144 | United States | 17.59 | 152 |
| 16 | Nigeria | 37.9 | 139 | Mexico | 17.40 | 113 | Tanzania | 73.05 | 132 | Sweden | 0.47 | 146 | United Kingdom | 17.41 | 155 |
| 17 | Turkey | 37.2 | 142 | South Africa | 18.80 | 121 | Mexico | 66.16 | 139 | Turkey | 0.41 | 150 | Sweden | 17.25 | 157 |
| 18 | Kenya | 36.9 | 145 | Tanzania | 29.00 | 156 | South Africa | 51.42 | 152 | Brazil | 0.40 | 152 | China | 16.59 | 163 |
| 19 | China | 35.4 | 155 | China | 31.00 | 158 | United States | 36.43 | 166 | Argentina | 0.29 | 159 | Poland | 15.10 | 186 |
| 20 | Indonesia | 33.6 | 162 | Indonesia | 35.50 | 167 | Sweden | 25.75 | 180 | China | -0.10 | 186 | Germany | 13.92 | 202 |
| 21 | Philippines | 32.1 | 168 | Egypt | 39.80 | 175 | Brazil | 25.16 | 182 | Poland | -0.37 | 194 | Spain | 13.26 | 205 |
| 22 | India | 27.6 | 175 | Nigeria | 40.10 | 176 | Argentina | 16.59 | 195 | Japan | -0.49 | 199 | Japan | 11.65 | 215 |
| 23 | Hong Kong | - | - | India | 50.60 | 193 | Australia | 3.38 | 215 | Germany | -0.62 | 203 | Hong Kong | 10.70 | 217 |

|  | Population | | | | |  | Health | | | | | | | | |
| --- | --- | --- | --- | --- | --- | --- | --- | --- | --- | --- | --- | --- | --- | --- | --- |
| **Net migration**  *ranking = neutral* | | | **Fertility rate**  *higher score = better*  *higher rank = better* | | | **Life Expectancy at Birth**  Total (years)  *higher score = better*  *higher rank = better* | | | **Birth Rate**  Per 1,000 people  *higher score = better*  *higher rank = better* | | | **Maternal Mortality Ratio**  Estimate, per 100,000 live births  *higher score = worse*  *higher rank = better* | | |
| **Country** | **Data** | **Global Rank** | **Country** | **Data** | **Global Rank** | **Country** | **Data** | **Global Rank** | **Country** | **Data** | **Global Rank** | **Country** | **Data** | **Global Rank** |
| Global Top | United States | 1286132 | 1 | Niger | 6.64 | 1 | Monaco | 86.37 | 1 | C. African Rep. | 46.36 | 1 | Norway | 1 | 1 |
| Global Median | St Vin. & Gren, | -737 | 108 | Curacao | 1.96 | 107 | Vietnam | 74.59 | 108 | Vietnam | 13.83 | 108 | Bhutan | 47 | 98 |
| Global Bottom | Pakistan | -1401173 | 217 | South Korea | 1.12 | 215 | Nigeria | 54.46 | 217 | Hong Kong | 4.40 | 217 | Nigeria | 993 | 197 |
|  |  |  |  |  |  |  |  |  |  |  |  |  |  |  |  |
| 1 | United States | 1286132 | 1 | Nigeria | 4.52 | 13 | Hong Kong | 85.25 | 3 | Tanzania | 35.22 | 10 | Hong Kong | 2 | 3 |
| 2 | United Kingdom | 417114 | 4 | Tanzania | 4.27 | 19 | Japan | 84.04 | 7 | Nigeria | 32.95 | 22 | Australia | 2 | 4 |
| 3 | South Africa | 166972 | 10 | Kenya | 3.16 | 43 | Spain | 83.88 | 9 | Kenya | 27.11 | 44 | Israel | 2 | 5 |
| 4 | Japan | 153357 | 12 | Israel | 2.92 | 46 | Sweden | 83.31 | 15 | Egypt | 21.00 | 68 | Poland | 2 | 8 |
| 5 | Australia | 138510 | 13 | Philippines | 2.75 | 56 | Israel | 83.20 | 16 | South Africa | 18.78 | 83 | Japan | 3 | 10 |
| 6 | Egypt | 123884 | 15 | Egypt | 2.65 | 60 | Australia | 83.05 | 21 | Israel | 18.60 | 84 | Spain | 3 | 14 |
| 7 | Spain | 111674 | 18 | South Africa | 2.27 | 77 | United Kingdom | 81.24 | 42 | India | 16.15 | 96 | Germany | 4 | 17 |
| 8 | Sweden | 50115 | 24 | Argentina | 2.15 | 87 | Germany | 80.54 | 46 | Philippines | 16.02 | 99 | Sweden | 4 | 23 |
| 9 | Germany | 36954 | 29 | India | 2.03 | 99 | Poland | 78.51 | 59 | Indonesia | 15.94 | 101 | UK | 8 | 44 |
| 10 | Israel | 10612 | 47 | Indonesia | 1.96 | 108 | United States | 78.39 | 62 | Mexico | 15.71 | 103 | Turkey | 15 | 61 |
| 11 | Argentina | 3454 | 58 | Turkey | 1.90 | 118 | China | 77.95 | 69 | Brazil | 12.32 | 121 | China | 16 | 64 |
| 12 | Hong Kong | -19272 | 173 | United States | 1.84 | 130 | Argentina | 77.40 | 79 | Turkey | 11.20 | 134 | Egypt | 17 | 67 |
| 13 | Kenya | -19781 | 170 | Mexico | 1.79 | 140 | Turkey | 77.16 | 83 | Argentina | 11.06 | 140 | United States | 17 | 69 |
| 14 | Tanzania | -29865 | 186 | Brazil | 1.74 | 147 | Brazil | 75.85 | 97 | Australia | 10.80 | 147 | Argentina | 33 | 83 |
| 15 | Nigeria | -35202 | 192 | Australia | 1.73 | 150 | Mexico | 75.07 | 104 | United States | 10.70 | 152 | Mexico | 42 | 96 |
| 16 | Indonesia | -38469 | 194 | Sweden | 1.67 | 164 | India | 72.00 | 138 | United Kingdom | 10.02 | 159 | Brazil | 67 | 116 |
| 17 | Mexico | -104581 | 202 | United Kingdom | 1.63 | 172 | Egypt | 71.63 | 141 | Sweden | 9.50 | 166 | Philippines | 84 | 125 |
| 18 | Philippines | -160373 | 207 | Germany | 1.58 | 180 | Indonesia | 71.15 | 147 | Germany | 8.30 | 188 | India | 80 | 126 |
| 19 | Brazil | -225510 | 209 | China | 1.55 | 183 | Philippines | 69.83 | 154 | Poland | 7.40 | 202 | South Africa | 118 | 137 |
| 20 | Poland | -238062 | 210 | Japan | 1.40 | 202 | Tanzania | 67.00 | 176 | Spain | 6.70 | 208 | Indonesia | 140 | 145 |
| 21 | Turkey | -275952 | 211 | Poland | 1.32 | 206 | South Africa | 66.14 | 183 | China | 6.39 | 210 | Kenya | 149 | 148 |
| 22 | China | -318992 | 212 | Spain | 1.30 | 207 | Kenya | 63.65 | 197 | Japan | 6.00 | 211 | Tanzania | 276 | 170 |
| 23 | India | -630830 | 216 | Hong Kong | 1.24 | 211 | Nigeria | 54.46 | 217 | Hong Kong | 4.40 | 217 | Nigeria | 993 | 197 |

|  | Health | | | Economics | | | | | | | | | | | |
| --- | --- | --- | --- | --- | --- | --- | --- | --- | --- | --- | --- | --- | --- | --- | --- |
| **Healthcare Spending**  **Per capita**  *higher score = better*  *higher rank = better* | | | **GDP per Capita**  Current US$  *higher score = better*  *higher rank = better* | | | **GDP growth**  Annual %  *higher score = better*  *higher rank = better* | | | **Gini Index**  *higher score = worse*  *higher rank = better* | | | **Unemployment**  % of total labor force  *higher score = worse*  *higher rank = better* | | |
| **Country** | **Data** | **Global Rank** | **Country** | **Data** | **Global Rank** | **Country** | **Data** | **Global Rank** | **Country** | **Data** | **Global Rank** | **Country** | **Data** | **Global Rank** |
| Global Top | United States | 12434.43 | 1 | Monaco | 256580.52 | 1 | Macau | 75.06 | 1 | Faroe Islands | 21.1 | 1 | Qatar | 0.13 | 1 |
| Global Median | Peru | 445.86 | 96 | Turkmenistan | 8232.65 | 108 | Papua N. G. | 3.04 | 108 | Vietnam | 36.1 | 104 | Kenya | 5.43 | 103 |
| Global Bottom | Somalia | 15.35 | 193 | Burundi | 193.01 | 217 | Sudan | -20.11 | 217 | Kuwait | 80.9 | 209 | Eswatini | 34.40 | 207 |
|  |  |  |  |  |  |  |  |  |  |  |  |  |  |  |  |
| 1 | United States | 12434.43 | 1 | United States | 82769.41 | 11 | India | 8.15 | 10 | Poland | 28.5 | 26 | Philippines | 2.15 | 21 |
| 2 | Australia | 6731.00 | 9 | Australia | 64820.91 | 18 | Kenya | 5.56 | 34 | Sweden | 29.8 | 38 | Poland | 2.47 | 26 |
| 3 | Germany | 6232.59 | 12 | Sweden | 55516.84 | 20 | Philippines | 5.55 | 35 | Egypt | 31.9 | 54 | Japan | 2.56 | 29 |
| 4 | Sweden | 6152.33 | 13 | Germany | 54343.23 | 24 | China | 5.25 | 42 | Germany | 32.4 | 58 | Tanzania | 2.58 | 30 |
| 5 | United Kingdom | 5366.78 | 18 | Israel | 52642.43 | 28 | Turkey | 5.11 | 47 | UK | 32.4 | 60 | Mexico | 2.71 | 35 |
| 6 | Israel | 4223.87 | 23 | Hong Kong | 50531.74 | 29 | Tanzania | 5.07 | 49 | India | 32.8 | 63 | Hong Kong | 2.79 | 37 |
| 7 | Japan | 3889.36 | 24 | United Kingdom | 49463.86 | 30 | Indonesia | 5.05 | 52 | Japan | 32.9 | 65 | Nigeria | 2.99 | 43 |
| 8 | Spain | 2910.84 | 31 | Japan | 33766.53 | 47 | Egypt | 3.76 | 85 | Spain | 33.9 | 82 | Israel | 3.15 | 50 |
| 9 | Poland | 1543.71 | 49 | Spain | 33509.01 | 49 | Australia | 3.44 | 97 | Australia | 34.3 | 84 | Indonesia | 3.30 | 56 |
| 10 | Argentina | 1370.88 | 50 | Poland | 22056.67 | 68 | Hong Kong | 3.28 | 100 | Nigeria | 35.1 | 95 | Germany | 3.41 | 60 |
| 11 | Brazil | 848.57 | 69 | Argentina | 14187.48 | 85 | Mexico | 3.20 | 104 | China | 35.7 | 101 | United States | 4.11 | 71 |
| 12 | China | 672.45 | 73 | Mexico | 13790.02 | 87 | Brazil | 2.91 | 112 | Indonesia | 36.1 | 105 | Australia | 4.07 | 72 |
| 13 | Mexico | 650.97 | 76 | Turkey | 13105.66 | 90 | United States | 2.89 | 114 | Israel | 37.9 | 121 | UK | 4.11 | 74 |
| 14 | South Africa | 569.84 | 82 | China | 12614.06 | 93 | Nigeria | 2.86 | 115 | Kenya | 38.7 | 128 | India | 4.20 | 75 |
| 15 | Turkey | 385.88 | 105 | Brazil | 10294.87 | 101 | Spain | 2.68 | 120 | Tanzania | 40.5 | 146 | China | 4.57 | 85 |
| 16 | Philippines | 194.06 | 127 | South Africa | 6022.54 | 125 | Israel | 2.42 | 130 | Argentina | 40.7 | 148 | Kenya | 5.43 | 105 |
| 17 | Egypt | 170.98 | 136 | Indonesia | 4876.31 | 137 | Japan | 1.68 | 151 | Philippines | 40.7 | 150 | Egypt | 7.20 | 134 |
| 18 | Indonesia | 127.44 | 140 | Philippines | 3804.87 | 148 | South Africa | 0.70 | 175 | United States | 41.3 | 155 | Brazil | 7.63 | 142 |
| 19 | Nigeria | 90.92 | 146 | Egypt | 3457.46 | 157 | United Kingdom | 0.34 | 184 | Mexico | 43.5 | 168 | Argentina | 7.88 | 148 |
| 20 | Kenya | 90.44 | 147 | India | 2480.79 | 165 | Poland | 0.14 | 186 | Turkey | 44.4 | 174 | Turkey | 8.45 | 151 |
| 21 | India | 79.52 | 156 | Kenya | 1952.30 | 177 | Germany | -0.27 | 192 | Brazil | 52.0 | 196 | Sweden | 8.53 | 153 |
| 22 | Tanzania | 35.65 | 181 | Nigeria | 1596.64 | 181 | Sweden | -0.31 | 193 | Hong Kong | 53.9 | 199 | Spain | 11.39 | 171 |
| 23 | Hong Kong | - | - | Tanzania | 1224.49 | 192 | Argentina | -1.61 | 202 | South Africa | 63.0 | 206 | South Africa | 33.17 | 206 |

|  | Governance | | | | | | | | | | | | Education | | |
| --- | --- | --- | --- | --- | --- | --- | --- | --- | --- | --- | --- | --- | --- | --- | --- |
|  | **Military Expenditure**  % of GDP  *higher score = worse*  *higher rank = better* | | | **Global Peace Index**  *higher score = worse*  *higher rank = better* | | | **Democracy Index**  *higher score = better*  *higher rank = better* | | | **Civil Liberties Index**  *higher score = better*  *higher rank = better* | | | **Government Expenditure**  **on Education**  Total, % of GDP  *higher score = better*  *higher rank = better* | | |
| **Country** | **Data** | **Global Rank** | **Country** | **Data** | **Global Rank** | **Country** | **Data** | **Global Rank** | **Country** | **Data** | **Global Rank** | **Country** | **Data** | **Global Rank** |
| Global Top | Costa Rica | 0.00 | 1 | Iceland | 1.11 | 1 | Norway | 9.81 | 1 | New Zealand | 10.00 | 1 | Kiribati | 14.20 | 1 |
| Global Median | Italy | 1.61 | 88 | Senegal | 2.08 | 81 | Armenia | 5.42 | 64 | Serbia | 6.33 | 64 | Russia | 4.05 | 111 |
| Global Bottom | Ukraine | 36.65 | 176 | Yemen | 3.40 | 162 | Afghanistan | 0.26 | 168 | North Korea | 0.00 | 168 | Armenia | 0.24 | 212 |
|  |  |  |  |  |  |  |  |  |  |  |  |  |  |  |  |
| 1 | Argentina | 0.47 | 12 | Japan | 1.53 | 17 | Sweden | 9.39 | 4 | Australia | 10.00 | 1 | Sweden | 7.57 | 14 |
| 2 | Mexico | 0.66 | 24 | Australia | 1.54 | 19 | Germany | 8.80 | 11 | Germany | 9.41 | 9 | Israel | 6.46 | 23 |
| 3 | Indonesia | 0.68 | 26 | Germany | 1.54 | 22 | Australia | 8.66 | 14 | Sweden | 9.41 | 12 | South Africa | 6.15 | 31 |
| 4 | South Africa | 0.73 | 29 | Spain | 1.60 | 23 | Japan | 8.40 | 15 | Japan | 9.12 | 17 | Brazil | 5.50 | 41 |
| 5 | Nigeria | 0.81 | 34 | Poland | 1.68 | 32 | United Kingdom | 8.28 | 18 | United Kingdom | 9.12 | 18 | United States | 5.43 | 44 |
| 6 | Egypt | 0.87 | 38 | UK | 1.70 | 34 | Spain | 8.07 | 24 | Spain | 8.53 | 37 | Australia | 5.21 | 53 |
| 7 | Kenya | 0.91 | 42 | Sweden | 1.78 | 39 | United States | 7.85 | 29 | United States | 8.53 | 38 | United Kingdom | 4.96 | 62 |
| 8 | Brazil | 1.08 | 51 | Argentina | 1.86 | 47 | Israel | 7.80 | 30 | Argentina | 7.94 | 40 | Argentina | 4.81 | 69 |
| 9 | Tanzania | 1.15 | 54 | Indonesia | 1.86 | 48 | India | 7.18 | 41 | Hong Kong | 7.94 | 41 | Poland | 4.67 | 78 |
| 10 | Japan | 1.20 | 58 | Tanzania | 1.99 | 63 | Poland | 7.18 | 42 | Brazil | 7.35 | 46 | Germany | 4.54 | 85 |
| 11 | Philippines | 1.25 | 63 | China | 2.10 | 86 | South Africa | 7.05 | 48 | Philippines | 7.35 | 53 | Spain | 4.32 | 95 |
| 12 | Sweden | 1.47 | 78 | Philippines | 2.21 | 103 | Brazil | 6.68 | 51 | Poland | 7.35 | 54 | Mexico | 4.25 | 98 |
| 13 | Turkey | 1.50 | 79 | Egypt | 2.21 | 104 | Philippines | 6.66 | 53 | South Africa | 7.35 | 57 | India | 4.12 | 106 |
| 14 | Spain | 1.51 | 80 | India | 2.32 | 115 | Argentina | 6.62 | 54 | India | 5.88 | 76 | China | 4.02 | 115 |
| 15 | Germany | 1.52 | 81 | Kenya | 2.41 | 121 | Indonesia | 6.53 | 56 | Israel | 5.59 | 82 | Kenya | 3.96 | 117 |
| 16 | China | 1.67 | 95 | South Africa | 2.51 | 125 | Tanzania | 5.35 | 86 | Mexico | 5.59 | 83 | Egypt | 3.93 | 120 |
| 17 | Australia | 1.92 | 107 | Brazil | 2.59 | 130 | Hong Kong | 5.24 | 88 | Indonesia | 5.29 | 88 | Hong Kong | 3.80 | 124 |
| 18 | UK | 2.26 | 120 | United States | 2.62 | 131 | Mexico | 5.14 | 89 | Tanzania | 4.71 | 98 | Philippines | 3.62 | 138 |
| 19 | India | 2.44 | 128 | Mexico | 2.78 | 137 | Kenya | 5.05 | 93 | Nigeria | 4.41 | 104 | Tanzania | 3.26 | 155 |
| 20 | United States | 3.36 | 147 | Turkey | 2.78 | 138 | Turkey | 4.33 | 102 | Kenya | 4.12 | 107 | Japan | 3.24 | 157 |
| 21 | Poland | 3.83 | 155 | Nigeria | 2.91 | 146 | Nigeria | 4.23 | 104 | Turkey | 2.06 | 148 | Turkey | 2.61 | 182 |
| 22 | Israel | 5.32 | 163 | Israel | 3.12 | 154 | Egypt | 2.93 | 127 | Egypt | 1.76 | 151 | Indonesia | 1.28 | 207 |
| 23 | Hong Kong | - | - | Hong Kong | - | - | China | 2.12 | 149 | China | 0.59 | 163 | Nigeria | 0.35 | 211 |

|  | Education | | | | | | Society | | | | | | | | |
| --- | --- | --- | --- | --- | --- | --- | --- | --- | --- | --- | --- | --- | --- | --- | --- |
| **Expected Years of Schooling**  *higher score = better*  *higher rank = better* | | | **Primary Completion Rate**  Total (% of relevant age group)  *higher score = better*  *higher rank = better* | | | **Incarceration Rate**  Per 100,000 people  *higher score = worse*  *higher rank = better* | | | **Intentional Homicides**  Per 100,000 people  *higher score = worse*  *higher rank = better* | | | **Marriage Rate**  Marriages per 1,000 people  *higher score = better*  *higher rank = better* | | |
| **Country** | **Data** | **Global Rank** | **Country** | **Data** | **Global Rank** | **Country** | **Data** | **Global Rank** | **Country** | **Data** | **Global Rank** | **Country** | **Data** | **Global Rank** |
| Global Top | Monaco | 21.7 | 1 | Monaco | 150.18 | 1 | San Marino | 3 | 1 | Am. Samoa | 0 | 1 | Virgin Is. (US) | 34.2 | 1 |
| Global Median | Oman | 13.4 | 98 | United States | 95.74 | 98 | Sri Lanka | 134 | 105 | Kiribati | 3 | 104 | Cuba | 5.0 | 81 |
| Global Bottom | South Sudan | 5.6 | 197 | South Sudan | 20.55 | 197 | El Salvador | 1659 | 210 | Jamaica | 52 | 209 | Guinea-Bissau | 0.2 | 162 |
|  |  |  |  |  |  |  |  |  |  |  |  |  |  |  |  |
| 1 | Australia | 20.7 | 3 | China | 106.38 | 16 | Japan | 33 | 9 | Japan | 0 | 9 | China | 9.6 | 19 |
| 2 | Turkey | 19.8 | 4 | Japan | 104.32 | 21 | Nigeria | 36 | 12 | Hong Kong | 0 | 14 | Indonesia | 7.6 | 35 |
| 3 | Sweden | 19.0 | 9 | Argentina | 103.23 | 27 | India | 41 | 16 | China | 1 | 23 | Hong Kong | 7.3 | 36 |
| 4 | Argentina | 18.8 | 11 | Kenya | 102.73 | 30 | Tanzania | 50 | 24 | Spain | 1 | 29 | Egypt | 7.2 | 41 |
| 5 | Spain | 17.8 | 17 | Mexico | 102.24 | 32 | Germany | 68 | 47 | Poland | 1 | 32 | Philippines | 6.1 | 54 |
| 6 | United Kingdom | 17.8 | 19 | Indonesia | 101.92 | 33 | Indonesia | 96 | 64 | Australia | 1 | 35 | Turkey | 5.8 | 60 |
| 7 | Germany | 17.3 | 23 | Turkey | 101.50 | 34 | Sweden | 96 | 66 | Germany | 1 | 41 | Tanzania | 5.5 | 69 |
| 8 | Hong Kong | 16.9 | 25 | United Kingdom | 100.09 | 48 | Kenya | 103 | 74 | UK | 1 | 46 | Israel | 5.3 | 73 |
| 9 | Poland | 16.7 | 30 | Sweden | 99.89 | 49 | Egypt | 116 | 85 | Indonesia | 1 | 50 | United States | 5.1 | 78 |
| 10 | United States | 15.9 | 51 | Australia | 99.67 | 50 | Spain | 117 | 87 | Sweden | 1 | 55 | Brazil | 4.7 | 90 |
| 11 | Brazil | 15.8 | 50 | Spain | 98.49 | 63 | China | 119 | 90 | Egypt | 1 | 65 | Germany | 4.5 | 93 |
| 12 | China | 15.5 | 57 | Poland | 98.25 | 69 | Hong Kong | 121 | 91 | Israel | 2 | 76 | Japan | 4.3 | 101 |
| 13 | Japan | 15.5 | 59 | Germany | 97.76 | 73 | UK | 139 | 104 | Turkey | 3 | 94 | Poland | 3.8 | 113 |
| 14 | Israel | 14.9 | 68 | Egypt | 97.47 | 74 | Philippines | 149 | 111 | India | 3 | 100 | South Africa | 3.8 | 112 |
| 15 | Mexico | 14.5 | 78 | Brazil | 96.04 | 96 | Australia | 162 | 117 | Tanzania | 4 | 113 | United Kingdom | 3.7 | 121 |
| 16 | South Africa | 13.8 | 92 | United States | 95.74 | 98 | Mexico | 175 | 124 | Philippines | 4 | 121 | Sweden | 3.6 | 122 |
| 17 | Indonesia | 13.3 | 100 | Israel | 94.91 | 108 | Poland | 193 | 137 | Argentina | 5 | 125 | Australia | 3.1 | 135 |
| 18 | Egypt | 13.1 | 108 | India | 93.49 | 117 | Israel | 217 | 149 | Kenya | 5 | 133 | Argentina | 2.7 | 141 |
| 19 | India | 13.0 | 114 | South Africa | 91.54 | 128 | South Africa | 249 | 161 | United States | 7 | 151 | Mexico | 2.6 | 142 |
| 20 | Philippines | 12.8 | 122 | Hong Kong | 86.30 | 149 | Argentina | 268 | 168 | Nigeria | 22 | 194 | Spain | 1.9 | 154 |
| 21 | Kenya | 11.5 | 146 | Tanzania | 86.23 | 150 | Brazil | 408 | 197 | Brazil | 22 | 195 | India | - | - |
| 22 | Nigeria | 10.5 | 173 | Nigeria | 83.91 | 156 | Turkey | 443 | 198 | Mexico | 28 | 197 | Kenya | - | - |
| 23 | Tanzania | 8.6 | 185 | Philippines | 80.71 | 162 | United States | 541 | 206 | South Africa | 42 | 208 | Nigeria | - | - |

|  | Society | | | Industry/Infrastructure | | | | | | | | | Overall Index | | |
| --- | --- | --- | --- | --- | --- | --- | --- | --- | --- | --- | --- | --- | --- | --- | --- |
|  | **Corruption Perception Index**  *higher score = better*  *higher rank = better* | | | **Sustainable Competitiveness Index**  *higher score = better*  *higher rank = better* | | | **Quality Infrastructure Index**  *higher score = better*  *higher rank = better* | | | **Mobile Cellular Subscriptions**  Per 100 people  *higher score = better*  *higher rank = better* | | | **Overall Index**  *higher score = worse*  *higher rank = better* | | |
| **Country** | **Data** | **Global Rank** | **Country** | **Data** | **Global Rank** | **Country** | **Data** | **Global Rank** | **Country** | **Data** | **Global Rank** | **Country** | **Data** | **Global Rank** |
| Global Top | Denmark | 90 | 1 | Sweden | 61.22 | 1 | China | 93.88 | 1 | Hong Kong | 291.91 | 1 | Iceland | 39.79 | 1 |
| Global Median | N. Macedonia | 40 | 90 | Suriname | 42.02 | 96 | N. Macedonia | 34.04 | 80 | Timor Leste | 110.42 | 111 | Mexico | 103.53 | 108 |
| Global Bottom | South Sudan | 8 | 180 | Somalia | 30.75 | 193 | Laos | 6.20 | 160 | Turks & Caicos | 0.00 | 212 | Eritrea | 148.73 | 217 |
|  |  |  |  |  |  |  |  |  |  |  |  |  |  |  |  |
| 1 | Sweden | 80 | 6 | Sweden | 61.22 | 1 | China | 93.88 | 1 | Hong Kong | 291.91 | 1 | Australia | 54.73 | 3 |
| 2 | Australia | 77 | 10 | Germany | 56.88 | 9 | Germany | 84.96 | 3 | Japan | 167.52 | 13 | Sweden | 57.97 | 7 |
| 3 | Germany | 75 | 16 | Japan | 56.69 | 10 | United States | 84.83 | 4 | South Africa | 167.40 | 15 | Japan | 60.87 | 10 |
| 4 | Hong Kong | 74 | 17 | United Kingdom | 55.61 | 13 | United Kingdom | 81.76 | 5 | Israel | 152.22 | 24 | UK | 64.47 | 13 |
| 5 | Japan | 71 | 22 | Poland | 55.07 | 17 | Japan | 80.71 | 8 | Philippines | 144.04 | 31 | Germany | 65.47 | 14 |
| 6 | United Kingdom | 71 | 21 | Australia | 53.86 | 25 | India | 75.04 | 9 | Argentina | 132.36 | 49 | Israel | 67.2 | 18 |
| 7 | United States | 65 | 28 | China | 52.85 | 29 | Australia | 74.54 | 10 | Poland | 131.94 | 51 | Spain | 75.93 | 31 |
| 8 | Israel | 64 | 29 | Spain | 51.88 | 32 | Spain | 73.51 | 12 | Germany | 125.23 | 69 | United States | 81.37 | 34 |
| 9 | Spain | 56 | 46 | United States | 50.98 | 36 | Turkey | 70.62 | 13 | Sweden | 125.07 | 68 | Poland | 83.03 | 40 |
| 10 | Poland | 53 | 54 | Israel | 49.45 | 44 | Brazil | 67.08 | 17 | China | 124.88 | 72 | Argentina | 83.37 | 44 |
| 11 | China | 43 | 77 | Argentina | 47.99 | 46 | South Africa | 65.60 | 18 | Spain | 124.10 | 71 | Hong Kong | 87.6 | 53 |
| 12 | South Africa | 41 | 85 | Turkey | 46.84 | 53 | Mexico | 63.86 | 21 | Kenya | 121.67 | 80 | Egypt | 94.7 | 70 |
| 13 | Tanzania | 41 | 86 | Brazil | 46.80 | 54 | Poland | 61.85 | 25 | United Kingdom | 120.82 | 81 | Indonesia | 97.6 | 81 |
| 14 | India | 38 | 97 | Philippines | 44.58 | 68 | Indonesia | 60.70 | 28 | Indonesia | 114.90 | 99 | Philippines | 100.53 | 95 |
| 15 | Argentina | 37 | 99 | Indonesia | 44.01 | 74 | Sweden | 58.29 | 34 | United States | 110.17 | 113 | Kenya | 102.65 | 100 |
| 16 | Indonesia | 37 | 101 | Mexico | 43.17 | 84 | Kenya | 48.62 | 46 | Australia | 107.03 | 117 | China | 102.7 | 101 |
| 17 | Brazil | 34 | 108 | Kenya | 43.07 | 86 | Argentina | 46.80 | 52 | Turkey | 105.81 | 124 | Tanzania | 102.97 | 103 |
| 18 | Turkey | 34 | 112 | India | 42.42 | 93 | Hong Kong | 45.44 | 56 | Nigeria | 101.69 | 131 | South Africa | 103.1 | 106 |
| 19 | Philippines | 33 | 119 | Tanzania | 39.96 | 124 | Egypt | 44.70 | 57 | Mexico | 100.29 | 136 | Mexico | 103.53 | 108 |
| 20 | Kenya | 32 | 123 | South Africa | 39.01 | 141 | Tanzania | 43.26 | 63 | Brazil | 98.89 | 139 | Turkey | 105.07 | 116 |
| 21 | Egypt | 30 | 130 | Nigeria | 38.32 | 147 | Philippines | 37.63 | 69 | Egypt | 93.21 | 151 | Brazil | 106.37 | 125 |
| 22 | Mexico | 26 | 142 | Egypt | 37.73 | 158 | Israel | 36.69 | 71 | Tanzania | 91.90 | 152 | India | 110.86 | 139 |
| 23 | Nigeria | 26 | 144 | Hong Kong | - | - | Nigeria | 14.82 | 134 | India | 80.65 | 163 | Nigeria | 120 | 171 |

|  | Overall Index (/7)  *higher score = worse*  *higher rank = better* | | |
| --- | --- | --- | --- |
| **Country** | **Data** | **Global Rank** |
| Global Top | Faroe Islands | 11.00 | 1 |
| Global Median | Armenia | 104.57 | 108 |
| Global Bottom | Eritrea | 171.33 | 117 |
|  |  |  |  |
| 1 | Japan | 28.71 | 6 |
| 2 | Germany | 36.00 | 10 |
| 3 | Australia | 37.00 | 11 |
| 4 | Sweden | 40.57 | 15 |
| 5 | UK | 45.43 | 19 |
| 6 | Hong Kong | 53.57 | 28 |
| 7 | Spain | 56.29 | 32 |
| 8 | Poland | 64.29 | 41 |
| 9 | Israel | 64.43 | 42 |
| 10 | United States | 65.43 | 43 |
| 11 | Argentina | 83.00 | 60 |
| 12 | Mexico | 90.00 | 70 |
| 13 | Philippines | 99.43 | 88 |
| 14 | China | 100.14 | 90 |
| 15 | Turkey | 103.71 | 103 |
| 16 | Indonesia | 103.86 | 104 |
| 17 | Brazil | 104.00 | 106 |
| 18 | India | 106.00 | 113 |
| 19 | Tanzania | 121.29 | 143 |
| 20 | Kenya | 124.71 | 149 |
| 21 | Nigeria | 129.43 | 159 |
| 22 | Egypt | 132.43 | 168 |
| 23 | South Africa | 133.71 | 170 |

## Supplementary Table 5. Objective Indicators – GFS Countries Ordered Alphabetically

|  | Geography | | | | | | | | | Climate/Weather | | | | | |
| --- | --- | --- | --- | --- | --- | --- | --- | --- | --- | --- | --- | --- | --- | --- | --- |
| **Altitude**  *ranking = neutral* | | | **Latitude**  *ranking = neutral* | | | **Surface Area**  Total in sq km  *ranking = neutral* | | | **Climate Risk Index**  *higher score = worse*  *higher rank = better* | | | **Temperature**  Average annual F.  *ranking = neutral* | | |
| **Country** | **Data** | **Global Rank** | **Country** | **Data** | **Global Rank** | **Country** | **Data** | **Global Rank** | **Country** | **Data** | **Global Rank** | **Country** | **Data** | **Global Rank** |
| Global Top | Bhutan | 10761.15 | 1 | Greenland | 71.71 | 1 | Russia | 17098250 | 1 | U.A.E. | 0.00 | 1 | Burkina Faso | 82.85 | 1 |
| Global Median | New Zealand | 1272.96 | 108 | Oman | 21.51 | 108 | Iceland | 103000 | 108 | Bhutan | 4.51 | 85 | Uganda | 73.04 | 108 |
| Global Bottom | Maldives | 4.92 | 217 | Kenya | 0.02 | 217 | Gibraltar | 10 | 217 | Dominica | 56.71 | 169 | Canada | 22.37 | 217 |
|  |  |  |  |  |  |  |  |  |  |  |  |  |  |  |  |
| Country | **GFS Rank** | **Data** | **Global Rank** | **GFS Rank** | **Data** | **Global Rank** | **GFS Rank** | **Data** | **Global Rank** | **GFS Rank** | **Data** | **Global Rank** | **GFS**  **Rank** | **Data** | **Global Rank** |
| Argentina | 10 | 1952.10 | 64 | 7 | 38.42 | 61 | 8 | 2780400 | 6 | 4 | 0.92 | 28 | 13 | 58.64 | 151 |
| Australia | 17 | 1082.68 | 124 | 13 | 25.27 | 94 | 4 | 7741220 | 8 | 13 | 4.66 | 88 | 10 | 70.97 | 120 |
| Brazil | 19 | 1049.87 | 130 | 18 | 14.24 | 147 | 3 | 8510418 | 5 | 12 | 3.27 | 71 | 5 | 76.91 | 78 |
| China | 1 | 6036.75 | 9 | 10 | 35.86 | 67 | 2 | 9562910 | 4 | 22 | 31.32 | 168 | 22 | 44.51 | 196 |
| Egypt | 18 | 1053.15 | 127 | 14 | 26.82 | 90 | 10 | 1001450 | 29 | 1 | 0.22 | 14 | 9 | 71.78 | 116 |
| Germany | 21 | 862.86 | 146 | 4 | 51.17 | 19 | 18 | 357600 | 64 | 16 | 9.63 | 126 | 19 | 47.30 | 185 |
| Hong Kong | 12 | 1572.00 | 81 | 16 | 22.40 | 102 | 23 | 1110 | 178 |  |  |  | 2 | 78.80 | 46 |
| India | 9 | 2037.40 | 62 | 17 | 20.59 | 113 | 5 | 3287260 | 7 | 21 | 20.64 | 164 | 7 | 74.57 | 102 |
| Indonesia | 16 | 1204.07 | 117 | 22 | 0.79 | 213 | 6 | 1916907 | 13 | 8 | 2.32 | 59 | 3 | 78.53 | 52 |
| Israel | 11 | 1666.67 | 74 | 11 | 31.05 | 80 | 22 | 22070 | 149 | 5 | 1.79 | 49 | 12 | 66.56 | 135 |
| Japan | 13 | 1437.01 | 97 | 9 | 36.20 | 63 | 17 | 377969 | 63 | 6 | 1.96 | 50 | 16 | 52.07 | 166 |
| Kenya | 8 | 2500.00 | 47 | 23 | 0.02 | 217 | 13 | 580370 | 46 | 17 | 11.46 | 133 | 8 | 76.55 | 85 |
| Mexico | 3 | 3645.01 | 28 | 15 | 23.63 | 98 | 7 | 1964375 | 14 | 11 | 2.47 | 62 | 11 | 69.80 | 128 |
| Nigeria | 15 | 1246.72 | 113 | 20 | 9.08 | 177 | 12 | 923770 | 31 | 7 | 1.86 | 51 | 1 | 80.24 | 32 |
| Philippines | 14 | 1450.13 | 96 | 19 | 12.88 | 158 | 20 | 300000 | 73 | 19 | 18.75 | 160 | 4 | 78.53 | 50 |
| Poland | 22 | 567.59 | 168 | 3 | 51.92 | 18 | 19 | 312720 | 72 | 9 | 2.34 | 60 | 21 | 46.13 | 190 |
| South Africa | 4 | 3392.39 | 32 | 12 | 30.56 | 81 | 9 | 1219090 | 24 | 14 | 5.05 | 94 | 14 | 63.95 | 143 |
| Spain | 6 | 2165.35 | 60 | 5 | 40.46 | 50 | 16 | 505978 | 53 | 20 | 19.81 | 162 | 15 | 55.94 | 154 |
| Sweden | 20 | 1049.87 | 131 | 1 | 60.13 | 7 | 15 | 528860 | 52 | 2 | 0.37 | 16 | 23 | 35.78 | 209 |
| Tanzania | 5 | 3339.90 | 33 | 21 | 6.37 | 194 | 11 | 947300 | 30 | 10 | 2.40 | 61 | 6 | 72.23 | 112 |
| Turkey | 2 | 3743.44 | 23 | 8 | 38.96 | 59 | 14 | 785350 | 36 | 3 | 0.60 | 20 | 17 | 51.98 | 167 |
| United Kingdom | 23 | 246.06 | 191 | 2 | 55.38 | 12 | 21 | 243610 | 79 | 15 | 6.90 | 111 | 20 | 47.21 | 187 |
| United States | 7 | 2493.44 | 48 | 6 | 37.09 | 62 | 1 | 9831510 | 3 | 18 | 16.78 | 157 | 18 | 47.39 | 184 |

|  | Climate/Weather | | | | | | Population | | | | | | | | | |
| --- | --- | --- | --- | --- | --- | --- | --- | --- | --- | --- | --- | --- | --- | --- | --- | --- |
| **Environmental Performance Index**  *higher score = better*  *higher rank = better* | | | **Air quality**  PM2.5 (µg/m³)  *higher score = worse*  *higher rank = better* | | | **Population Density**  People per sq. km of  land area  *ranking = neutral* | | | **Population Growth**  Annual %  *ranking = neutral* | | | **Population Ages 0-14**  % of total population  *ranking = neutral* | | | |
| **Country** | **Data** | **Global Rank** | **Country** | **Data** | **Global Rank** | **Country** | **Data** | **Global Rank** | **Country** | **Data** | **Global Rank** | **Country** | **Data** | | **Global Rank** |
| Global Top | Estonia | 75.7 | 1 | St Lucia | 2.10 | 1 | Macau | 20681.82 | 1 | Oman | 6.53 | 1 | C. African Rep. | | 49.17 | 1 |
| Global Median | Thailand | 45.7 | 89 | Palau | 16.00 | 100 | Cambodia | 97.45 | 108 | C. African Rep. | 1.06 | 108 | Vietnam | | 23.61 | 108 |
| Global Bottom | Vietnam | 24.6 | 179 | Chad | 91.80 | 200 | Greenland | 0.14 | 217 | Ukraine | -8.42 | 217 | Hong Kong | | 10.70 | 217 |
|  |  |  |  |  |  |  |  |  |  |  |  |  |  |  | |  |
| Country | **GFS**  **Rank** | **Data** | **Global Rank** | **GFS Rank** | **Data** | **Global Rank** | **GFS Rank** | **Data** | **Global Rank** | **GFS Rank** | **Data** | **Global Rank** | **GFS Rank** | **Data** | | **Global Rank** |
| Argentina | 11 | 47 | 80 | 6 | 8.70 | 36 | 22 | 16.59 | 195 | 19 | 0.29 | 159 | 11 | 22.19 | | 114 |
| Australia | 8 | 63.1 | 23 | 1 | 4.50 | 14 | 23 | 3.38 | 215 | 3 | 2.45 | 36 | 13 | 18.03 | | 148 |
| Brazil | 9 | 53 | 48 | 12 | 14.90 | 90 | 21 | 25.16 | 182 | 18 | 0.40 | 152 | 14 | 19.94 | | 129 |
| China | 19 | 35.4 | 155 | 19 | 31.00 | 158 | 9 | 150.42 | 75 | 20 | -0.10 | 186 | 18 | 16.59 | | 163 |
| Egypt | 14 | 43.7 | 100 | 21 | 39.80 | 175 | 12 | 113.13 | 94 | 7 | 1.69 | 71 | 4 | 32.44 | | 62 |
| Germany | 1 | 74.5 | 3 | 8 | 9.00 | 41 | 6 | 239.86 | 56 | 23 | -0.62 | 203 | 20 | 13.92 | | 202 |
| Hong Kong | . |  | . | 14 | 16.30 | 102 | 1 | 7060.10 | 4 | 2 | 2.55 | 29 | 23 | 10.70 | | 217 |
| India | 22 | 27.6 | 175 | 23 | 50.60 | 193 | 2 | 479.43 | 25 | 10 | 0.88 | 120 | 6 | 25.06 | | 100 |
| Indonesia | 20 | 33.6 | 162 | 20 | 35.50 | 167 | 10 | 147.33 | 78 | 12 | 0.84 | 123 | 9 | 24.93 | | 102 |
| Israel | 10 | 48 | 68 | 15 | 17.20 | 110 | 3 | 433.06 | 27 | 5 | 2.06 | 54 | 8 | 27.61 | | 85 |
| Japan | 7 | 61.4 | 27 | 5 | 8.60 | 35 | 5 | 343.28 | 34 | 22 | -0.49 | 199 | 22 | 11.65 | | 215 |
| Kenya | 18 | 36.9 | 145 | 9 | 14.30 | 81 | 15 | 95.32 | 111 | 8 | 1.98 | 62 | 3 | 37.45 | | 43 |
| Mexico | 12 | 44.2 | 96 | 16 | 17.40 | 113 | 17 | 66.16 | 139 | 11 | 0.87 | 122 | 10 | 24.92 | | 103 |
| Nigeria | 16 | 37.9 | 139 | 22 | 40.10 | 176 | 7 | 245.01 | 54 | 4 | 2.10 | 53 | 2 | 41.49 | | 18 |
| Philippines | 21 | 32.1 | 168 | 10 | 14.80 | 87 | 4 | 382.21 | 30 | 13 | 0.81 | 124 | 5 | 28.61 | | 81 |
| Poland | 4 | 64.2 | 22 | 11 | 14.80 | 88 | 11 | 120.30 | 91 | 21 | -0.37 | 194 | 19 | 15.10 | | 186 |
| South Africa | 15 | 42.7 | 105 | 17 | 18.80 | 121 | 18 | 51.42 | 152 | 6 | 1.33 | 91 | 7 | 26.08 | | 92 |
| Spain | 5 | 64 | 20 | 7 | 8.70 | 37 | 13 | 95.57 | 110 | 9 | 1.23 | 98 | 21 | 13.26 | | 205 |
| Sweden | 3 | 70.3 | 8 | 2 | 5.30 | 17 | 20 | 25.75 | 180 | 16 | 0.47 | 146 | 17 | 17.25 | | 157 |
| Tanzania | 13 | 43.6 | 101 | 18 | 29.00 | 156 | 16 | 73.05 | 132 | 1 | 2.90 | 21 | 1 | 42.72 | | 14 |
| Turkey | 17 | 37.2 | 142 | 13 | 15.30 | 98 | 14 | 110.42 | 97 | 17 | 0.41 | 150 | 12 | 21.84 | | 115 |
| United Kingdom | 2 | 72.6 | 5 | 4 | 7.40 | 31 | 8 | 280.21 | 44 | 14 | 0.82 | 126 | 16 | 17.41 | | 155 |
| United States | 6 | 57.2 | 35 | 3 | 7.10 | 28 | 19 | 36.43 | 166 | 15 | 0.49 | 144 | 15 | 17.59 | | 152 |

|  | Population | | | | | | Health | | | | | | | | |
| --- | --- | --- | --- | --- | --- | --- | --- | --- | --- | --- | --- | --- | --- | --- | --- |
| **Net migration**  *ranking = neutral* | | | **Fertility rate**  *higher score = better*  *higher rank = better* | | | **Life Expectancy at Birth**  Total (years)  *higher score = better*  *higher rank = better* | | | **Birth Rate**  Per 1,000 people  *higher score = better*  *higher rank = better* | | | **Maternal Mortality Ratio**  Estimate, per 100,000 live births  *higher score = worse*  *higher rank = better* | | |
| **Country** | **Data** | **Global Rank** | **Country** | **Data** | **Global Rank** | **Country** | **Data** | **Global Rank** | **Country** | **Data** | **Global Rank** | **Country** | **Data** | **Global Rank** |
| Global Top | United States | 1286132 | 1 | Niger | 6.64 | 1 | Monaco | 86.37 | 1 | C. African Rep. | 46.36 | 1 | Nigeria | 993 | 1 |
| Global Median | St Vin. & Gren, | -737 | 108 | Curacao | 1.96 | 107 | Vietnam | 74.59 | 108 | Vietnam | 13.83 | 108 | Bhutan | 47 | 98 |
| Global Bottom | Pakistan | -1401173 | 217 | South Korea | 1.12 | 215 | Nigeria | 54.46 | 217 | Hong Kong | 4.40 | 217 | Norway | 1 | 197 |
|  |  |  |  |  |  |  |  |  |  |  |  |  |  |  |  |
| Country | **GFS Rank** | **Data** | **Global Rank** | **GFS Rank** | **Data** | **Global Rank** | **GFS Rank** | **Data** | **Global Rank** | **GFS Rank** | **Data** | **Global Rank** | **GFS Rank** | **Data** | **Global Rank** |
| Argentina | 11 | 3454 | 58 | 6 | 2.15 | 87 | 12 | 77.40 | 79 | 14 | 11.06 | 140 | 14 | 33 | 83 |
| Australia | 5 | 138510 | 13 | 15 | 1.73 | 150 | 8 | 83.05 | 21 | 13 | 10.80 | 147 | 2 | 2 | 4 |
| Brazil | 19 | -225510 | 209 | 13 | 1.74 | 147 | 13 | 75.85 | 97 | 11 | 12.32 | 121 | 16 | 67 | 116 |
| China | 22 | -318992 | 212 | 19 | 1.55 | 183 | 11 | 77.95 | 69 | 21 | 6.39 | 210 | 11 | 16 | 64 |
| Egypt | 8 | 123884 | 15 | 8 | 2.65 | 60 | 17 | 71.63 | 141 | 4 | 21.00 | 68 | 12 | 17 | 67 |
| Germany | 9 | 36954 | 29 | 18 | 1.58 | 180 | 6 | 80.54 | 46 | 18 | 8.30 | 188 | 7 | 4 | 17 |
| Hong Kong | 12 | -19272 | 173 | 23 | 1.24 | 211 | 1 | 85.25 | 3 | 23 | 4.40 | 217 | 1 | 2 | 3 |
| India | 23 | -630830 | 216 | 9 | 2.03 | 99 | 16 | 72.00 | 138 | 7 | 16.15 | 96 | 18 | 80 | 126 |
| Indonesia | 16 | -38469 | 194 | 10 | 1.96 | 108 | 18 | 71.15 | 147 | 9 | 15.94 | 101 | 20 | 140 | 145 |
| Israel | 10 | 10612 | 47 | 4 | 2.92 | 46 | 5 | 83.20 | 16 | 8 | 18.60 | 84 | 3 | 2 | 5 |
| Japan | 4 | 153357 | 12 | 20 | 1.40 | 202 | 2 | 84.04 | 7 | 22 | 6.00 | 211 | 5 | 3 | 10 |
| Kenya | 14 | -19781 | 170 | 3 | 3.16 | 43 | 22 | 63.65 | 197 | 3 | 27.11 | 44 | 21 | 149 | 148 |
| Mexico | 17 | -104581 | 202 | 14 | 1.79 | 140 | 15 | 75.07 | 104 | 10 | 15.71 | 103 | 15 | 42 | 96 |
| Nigeria | 15 | -35202 | 192 | 1 | 4.52 | 13 | 23 | 54.46 | 217 | 2 | 32.95 | 22 | 23 | 993 | 197 |
| Philippines | 18 | -160373 | 207 | 5 | 2.75 | 56 | 19 | 69.83 | 154 | 6 | 16.02 | 99 | 17 | 84 | 125 |
| Poland | 20 | -238062 | 210 | 21 | 1.32 | 206 | 9 | 78.51 | 59 | 19 | 7.40 | 202 | 4 | 2 | 8 |
| South Africa | 3 | 166972 | 10 | 7 | 2.27 | 77 | 21 | 66.14 | 183 | 5 | 18.78 | 83 | 19 | 118 | 137 |
| Spain | 7 | 111674 | 18 | 22 | 1.30 | 207 | 3 | 83.88 | 9 | 20 | 6.70 | 208 | 6 | 3 | 14 |
| Sweden | 6 | 50115 | 24 | 16 | 1.67 | 164 | 4 | 83.31 | 15 | 17 | 9.50 | 166 | 8 | 4 | 23 |
| Tanzania | 13 | -29865 | 186 | 2 | 4.27 | 19 | 20 | 67.00 | 176 | 1 | 35.22 | 10 | 22 | 276 | 170 |
| Turkey | 21 | -275952 | 211 | 11 | 1.90 | 118 | 14 | 77.16 | 83 | 12 | 11.20 | 134 | 10 | 15 | 61 |
| United Kingdom | 2 | 417114 | 4 | 17 | 1.63 | 172 | 7 | 81.24 | 42 | 16 | 10.02 | 159 | 9 | 8 | 44 |
| United States | 1 | 1286132 | 1 | 12 | 1.84 | 130 | 10 | 78.39 | 62 | 15 | 10.70 | 152 | 13 | 17 | 69 |

|  | Health | | | Economics | | | | | | | | | | | |
| --- | --- | --- | --- | --- | --- | --- | --- | --- | --- | --- | --- | --- | --- | --- | --- |
|  | **Healthcare Spending**  Per capita  *higher score = better*  *higher rank = better* | | | **GDP per Capita**  Current US$  *higher score = better*  *higher rank = better* | | | **GDP growth**  Annual %  *higher score = better*  *higher rank = better* | | | **Gini Index**  *higher score = worse*  *higher rank = better* | | | **Unemployment**  % of total labor force  *higher score = worse*  *higher rank = better* | | |
| **Country** | **Data** | **Global Rank** | **Country** | **Data** | **Global Rank** | **Country** | **Data** | **Global Rank** | **Country** | **Data** | **Global Rank** | **Country** | **Data** | **Global Rank** |
| Global Top | United States | 12434.43 | 1 | Monaco | 256580.52 | 1 | Macau | 75.06 | 1 | Faroe Islands | 21.1 | 1 | Qatar | 0.13 | 1 |
| Global Median | Peru | 445.86 | 96 | Turkmenistan | 8232.65 | 108 | Papua N. G. | 3.04 | 108 | Vietnam | 36.1 | 104 | Kenya | 5.43 | 103 |
| Global Bottom | Somalia | 15.35 | 193 | Burundi | 193.01 | 217 | Sudan | -20.11 | 217 | Kuwait | 80.9 | 209 | Eswatini | 34.40 | 207 |
|  |  |  |  |  |  |  |  |  |  |  |  |  |  |  |  |
| Country | **GFS Rank** | **Data** | **Global Rank** | **GFS Rank** | **Data** | **Global Rank** | **GFS Rank** | **Data** | **Global Rank** | **GFS Rank** | **Data** | **Global Rank** | **GFS Rank** | **Data** | **Global Rank** |
| Argentina | 10 | 1370.88 | 50 | 11 | 14187.48 | 85 | 23 | -1.61 | 202 | 16 | 40.7 | 148 | 19 | 7.88 | 148 |
| Australia | 2 | 6731.00 | 9 | 2 | 64820.91 | 18 | 9 | 3.44 | 97 | 9 | 34.3 | 84 | 12 | 4.07 | 72 |
| Brazil | 11 | 848.57 | 69 | 15 | 10294.87 | 101 | 12 | 2.91 | 112 | 21 | 52.0 | 196 | 18 | 7.63 | 142 |
| China | 12 | 672.45 | 73 | 13 | 12614.06 | 93 | 4 | 5.25 | 42 | 11 | 35.7 | 101 | 15 | 4.57 | 85 |
| Egypt | 17 | 170.98 | 136 | 19 | 3457.46 | 157 | 6 | 3.76 | 85 | 3 | 31.9 | 54 | 17 | 7.20 | 134 |
| Germany | 3 | 6232.59 | 12 | 4 | 54343.23 | 24 | 21 | -0.27 | 192 | 4 | 32.4 | 58 | 10 | 3.41 | 60 |
| Hong Kong |  |  |  | 8 | 50531.74 | 29 | 10 | 3.28 | 100 | 22 | 53.9 | 199 | 6 | 2.79 | 37 |
| India | 21 | 79.52 | 156 | 20 | 2480.79 | 165 | 1 | 8.15 | 10 | 6 | 32.8 | 63 | 14 | 4.20 | 75 |
| Indonesia | 18 | 127.44 | 140 | 17 | 4876.31 | 137 | 7 | 5.05 | 52 | 12 | 36.1 | 105 | 9 | 3.30 | 56 |
| Israel | 8 | 4223.87 | 23 | 5 | 52642.43 | 28 | 16 | 2.42 | 130 | 13 | 37.9 | 121 | 8 | 3.15 | 50 |
| Japan | 7 | 3889.36 | 24 | 6 | 33766.53 | 47 | 17 | 1.68 | 151 | 7 | 32.9 | 65 | 3 | 2.56 | 29 |
| Kenya | 20 | 90.44 | 147 | 21 | 1952.30 | 177 | 2 | 5.56 | 34 | 14 | 38.7 | 128 | 16 | 5.43 | 105 |
| Mexico | 14 | 650.97 | 76 | 12 | 13790.02 | 87 | 11 | 3.20 | 104 | 19 | 43.5 | 168 | 5 | 2.71 | 35 |
| Nigeria | 19 | 90.92 | 146 | 22 | 1596.64 | 181 | 13 | 2.86 | 115 | 10 | 35.1 | 95 | 7 | 2.99 | 43 |
| Philippines | 16 | 194.06 | 127 | 18 | 3804.87 | 148 | 3 | 5.55 | 35 | 17 | 40.7 | 150 | 1 | 2.15 | 21 |
| Poland | 9 | 1543.71 | 49 | 10 | 22056.67 | 68 | 20 | 0.14 | 186 | 1 | 28.5 | 26 | 2 | 2.47 | 26 |
| South Africa | 13 | 569.84 | 82 | 16 | 6022.54 | 125 | 18 | 0.70 | 175 | 23 | 63.0 | 206 | 23 | 33.17 | 206 |
| Spain | 6 | 2910.84 | 31 | 9 | 33509.01 | 49 | 15 | 2.68 | 120 | 8 | 33.9 | 82 | 22 | 11.39 | 171 |
| Sweden | 4 | 6152.33 | 13 | 3 | 55516.84 | 20 | 22 | -0.31 | 193 | 2 | 29.8 | 38 | 21 | 8.53 | 153 |
| Tanzania | 22 | 35.65 | 181 | 23 | 1224.49 | 192 | 8 | 5.07 | 49 | 15 | 40.5 | 146 | 4 | 2.58 | 30 |
| Turkey | 15 | 385.88 | 105 | 14 | 13105.66 | 90 | 5 | 5.11 | 47 | 20 | 44.4 | 174 | 20 | 8.45 | 151 |
| United Kingdom | 5 | 5366.78 | 18 | 7 | 49463.86 | 30 | 19 | 0.34 | 184 | 5 | 32.4 | 60 | 13 | 4.11 | 74 |
| United States | 1 | 12434.43 | 1 | 1 | 82769.41 | 11 | 14 | 2.89 | 114 | 8 | 41.3 | 55 | 12 | 4.11 | 134 |

|  | Governance | | | | | | | | | | | |  | Education |  |
| --- | --- | --- | --- | --- | --- | --- | --- | --- | --- | --- | --- | --- | --- | --- | --- |
|  | **Military Expenditure**  % of GDP  *higher score = worse*  *higher rank = better* | | | **Global Peace Index**  *higher score = worse*  *higher rank = better* | | | **Democracy Index**  *higher score = better*  *higher rank = better* | | | **Civil Liberties Index**  Higher = better  *higher score = better*  *higher rank = better* | | | **Government Expenditure**  **on Education**  Total, % of GDP  *higher score = better*  *higher rank = better* | | |
| **Country** | **Data** | **Global Rank** | **Country** | **Data** | **Global Rank** | **Country** | **Data** | **Global Rank** | **Country** | **Data** | **Global Rank** | **Country** | **Data** | **Global Rank** |
| Global Top | Costa Rica | 0.00 | 1 | Yemen | 3.40 | 1 | Norway | 9.81 | 1 | New Zealand | 10.00 | 1 | Kiribati | 14.20 | 1 |
| Global Median | Italy | 1.61 | 88 | Senegal | 2.08 | 81 | Armenia | 5.42 | 64 | Serbia | 6.33 | 64 | Russia | 4.05 | 111 |
| Global Bottom | Ukraine | 36.65 | 176 | Iceland | 1.11 | 162 | Afghanistan | 0.26 | 168 | North Korea | 0.00 | 168 | Armenia | 0.24 | 212 |
|  |  |  |  |  |  |  |  |  |  |  |  |  |  |  |  |
| Country | **GFS Rank** | **Data** | **Global Rank** | **GFS Rank** | **Data** | **Global Rank** | **GFS Rank** | **Data** | **Global Rank** | **GFS**  **Rank** | **Data** | **Global Rank** | **GFS Rank** | **Data** | **Global Rank** |
| Argentina | 1 | 0.47 | 12 | 8 | 1.86 | 47 | 13 | 6.62 | 54 | 6 | 7.94 | 40 | 6 | 4.81 | 69 |
| Australia | 17 | 1.92 | 107 | 2 | 1.54 | 19 | 3 | 8.66 | 14 | 1 | 10.00 | 1 | 8 | 5.21 | 53 |
| Brazil | 8 | 1.08 | 51 | 17 | 2.59 | 130 | 12 | 6.68 | 51 | 10 | 7.35 | 46 | 4 | 5.50 | 41 |
| China | 16 | 1.67 | 95 | 11 | 2.10 | 86 | 23 | 2.12 | 149 | 23 | 0.59 | 163 | 13 | 4.02 | 115 |
| Egypt | 6 | 0.87 | 38 | 13 | 2.21 | 104 | 22 | 2.93 | 127 | 22 | 1.76 | 151 | 16 | 3.93 | 120 |
| Germany | 15 | 1.52 | 81 | 3 | 1.54 | 22 | 2 | 8.80 | 11 | 2 | 9.41 | 9 | 10 | 4.54 | 85 |
| Hong Kong |  |  |  |  |  |  | 17 | 5.24 | 88 | 9 | 7.94 | 41 | 17 | 3.80 | 124 |
| India | 19 | 2.44 | 128 | 14 | 2.32 | 115 | 9 | 7.18 | 41 | 13 | 5.88 | 76 | 14 | 4.12 | 106 |
| Indonesia | 3 | 0.68 | 26 | 9 | 1.86 | 48 | 15 | 6.53 | 56 | 17 | 5.29 | 88 | 22 | 1.28 | 207 |
| Israel | 22 | 5.32 | 163 | 22 | 3.12 | 154 | 6 | 7.80 | 30 | 15 | 5.59 | 82 | 2 | 6.46 | 23 |
| Japan | 10 | 1.20 | 58 | 1 | 1.53 | 17 | 4 | 8.40 | 15 | 4 | 9.12 | 17 | 20 | 3.24 | 157 |
| Kenya | 7 | 0.91 | 42 | 15 | 2.41 | 121 | 19 | 5.05 | 93 | 20 | 4.12 | 107 | 15 | 3.96 | 117 |
| Mexico | 2 | 0.66 | 24 | 19 | 2.78 | 137 | 18 | 5.14 | 89 | 16 | 5.59 | 83 | 12 | 4.25 | 98 |
| Nigeria | 5 | 0.81 | 34 | 21 | 2.91 | 146 | 21 | 4.23 | 104 | 19 | 4.41 | 104 | 23 | 0.35 | 211 |
| Philippines | 11 | 1.25 | 63 | 12 | 2.21 | 103 | 14 | 6.66 | 53 | 11 | 7.35 | 53 | 18 | 3.62 | 138 |
| Poland | 21 | 3.83 | 155 | 5 | 1.68 | 32 | 10 | 7.18 | 42 | 12 | 7.35 | 54 | 9 | 4.67 | 78 |
| South Africa | 4 | 0.73 | 29 | 16 | 2.51 | 125 | 11 | 7.05 | 48 | 14 | 7.35 | 57 | 3 | 6.15 | 31 |
| Spain | 14 | 1.51 | 80 | 4 | 1.60 | 23 | 8 | 8.07 | 24 | 8 | 8.53 | 37 | 11 | 4.32 | 95 |
| Sweden | 12 | 1.47 | 78 | 7 | 1.78 | 39 | 1 | 9.39 | 4 | 3 | 9.41 | 12 | 1 | 7.57 | 14 |
| Tanzania | 9 | 1.15 | 54 | 10 | 1.99 | 63 | 16 | 5.35 | 86 | 18 | 4.71 | 98 | 19 | 3.26 | 155 |
| Turkey | 13 | 1.50 | 79 | 20 | 2.78 | 138 | 20 | 4.33 | 102 | 21 | 2.06 | 148 | 21 | 2.61 | 182 |
| United Kingdom | 18 | 2.26 | 120 | 6 | 1.70 | 34 | 5 | 8.28 | 18 | 5 | 9.12 | 18 | 7 | 4.96 | 62 |
| United States | 20 | 3.36 | 147 | 18 | 2.62 | 131 | 7 | 7.85 | 29 | 7 | 8.53 | 38 | 5 | 5.43 | 44 |

|  | Education | | | | | | Society | | | | | | | | |
| --- | --- | --- | --- | --- | --- | --- | --- | --- | --- | --- | --- | --- | --- | --- | --- |
| **Expected Years of Schooling**  *higher score = better*  *higher rank = better* | | | **Primary Completion Rate**  Total (% of relevant age group)  *higher score = better*  *higher rank = better* | | | **Incarceration Rate**  Per 100,000 people  *higher score = worse*  *higher rank = better* | | | **Intentional Homicides**  Per 100,000 people  *higher score = worse*  *higher rank = better* | | | **Marriage Rate**  Marriages per 1,000 people  *higher score = better*  *higher rank = better* | | |
| **Country** | **Data** | **Global Rank** | **Country** | **Data** | **Global Rank** | **Country** | **Data** | **Global Rank** | **Country** | **Data** | **Global Rank** | **Country** | **Data** | **Global Rank** |
| Global Top | Monaco | 21.7 | 1 | Monaco | 150.18 | 1 | San Marino | 3 | 1 | Am. Samoa | 0 | 1 | Virgin Is. (US) | 34.2 | 1 |
| Global Median | Oman | 13.4 | 98 | United States | 95.74 | 98 | Sri Lanka | 134 | 105 | Kiribati | 3 | 104 | Cuba | 5.0 | 81 |
| Global Bottom | South Sudan | 5.6 | 197 | South Sudan | 20.55 | 197 | El Salvador | 1659 | 210 | Jamaica | 52 | 209 | Guinea-Bissau | 0.2 | 162 |
|  |  |  |  |  |  |  |  |  |  |  |  |  |  |  |  |
| Country | **GFS Rank** | **Data** | **Global Rank** | **GFS Rank** | **Data** | **Global Rank** | **GFS Rank** | **Data** | **Global Rank** | **GFS Rank** | **Data** | **Global Rank** | **GFS**  **Rank** | **Data** | **Global Rank** |
| Argentina | 4 | 18.8 | 11 | 3 | 103.23 | 27 | 20 | 268 | 168 | 17 | 5 | 125 | 18 | 2.7 | 141 |
| Australia | 1 | 20.7 | 3 | 10 | 99.67 | 50 | 15 | 162 | 117 | 6 | 1 | 35 | 17 | 3.1 | 135 |
| Brazil | 11 | 15.8 | 50 | 15 | 96.04 | 96 | 21 | 408 | 197 | 21 | 22 | 195 | 10 | 4.7 | 90 |
| China | 12 | 15.5 | 57 | 1 | 106.38 | 16 | 11 | 119 | 90 | 3 | 1 | 23 | 1 | 9.6 | 19 |
| Egypt | 18 | 13.1 | 108 | 13 | 97.47 | 74 | 9 | 116 | 85 | 11 | 1 | 65 | 4 | 7.2 | 41 |
| Germany | 7 | 17.3 | 23 | 14 | 97.76 | 73 | 5 | 68 | 47 | 7 | 1 | 41 | 11 | 4.5 | 93 |
| Hong Kong | 6 | 16.9 | 25 | 20 | 86.30 | 149 | 12 | 121 | 91 | 2 | 0 | 14 | 3 | 7.3 | 36 |
| India | 19 | 13.0 | 114 | 18 | 93.49 | 117 | 3 | 41 | 16 | 14 | 3 | 100 |  |  |  |
| Indonesia | 17 | 13.3 | 100 | 8 | 101.92 | 33 | 6 | 96 | 64 | 9 | 1 | 50 | 2 | 7.6 | 35 |
| Israel | 13 | 14.9 | 68 | 17 | 94.91 | 108 | 18 | 217 | 149 | 12 | 2 | 76 | 6 | 5.3 | 73 |
| Japan | 14 | 15.5 | 59 | 2 | 104.32 | 21 | 1 | 33 | 9 | 1 | 0 | 9 | 12 | 4.3 | 101 |
| Kenya | 21 | 11.5 | 146 | 4 | 102.73 | 30 | 8 | 103 | 74 | 18 | 5 | 133 |  |  |  |
| Mexico | 15 | 14.5 | 78 | 5 | 102.24 | 32 | 16 | 175 | 124 | 22 | 28 | 197 | 19 | 2.6 | 142 |
| Nigeria | 22 | 10.5 | 173 | 22 | 83.91 | 156 | 2 | 36 | 12 | 20 | 22 | 194 |  |  |  |
| Philippines | 20 | 12.8 | 122 | 23 | 80.71 | 162 | 14 | 149 | 111 | 16 | 4 | 121 | 5 | 6.1 | 54 |
| Poland | 9 | 16.7 | 30 | 12 | 98.25 | 69 | 17 | 193 | 137 | 5 | 1 | 32 | 14 | 3.8 | 113 |
| South Africa | 16 | 13.8 | 92 | 19 | 91.54 | 128 | 19 | 249 | 161 | 23 | 42 | 208 | 13 | 3.8 | 112 |
| Spain | 5 | 17.8 | 17 | 11 | 98.49 | 63 | 10 | 117 | 87 | 4 | 1 | 29 | 20 | 1.9 | 154 |
| Sweden | 3 | 19.0 | 9 | 9 | 99.89 | 49 | 7 | 96 | 66 | 10 | 1 | 55 | 16 | 3.6 | 122 |
| Tanzania | 23 | 8.6 | 185 | 21 | 86.23 | 150 | 4 | 50 | 24 | 15 | 4 | 113 | 7 | 5.5 | 69 |
| Turkey | 2 | 19.8 | 4 | 7 | 101.50 | 34 | 22 | 443 | 198 | 13 | 3 | 94 | 8 | 5.8 | 60 |
| United Kingdom | 8 | 17.8 | 19 | 6 | 100.09 | 48 | 13 | 139 | 104 | 8 | 1 | 46 | 15 | 3.7 | 121 |
| United States | 10 | 15.9 | 51 | 16 | 95.74 | 98 | 23 | 541 | 206 | 19 | 7 | 151 | 9 | 5.1 | 78 |

|  | Society | | | Industry/Infrastructure | | | | | | | | | Overall Index | | |
| --- | --- | --- | --- | --- | --- | --- | --- | --- | --- | --- | --- | --- | --- | --- | --- |
|  | **Corruption Perception Index**  *higher score = better*  *higher rank = better* | | | **Sustainable Competitiveness Index**  *higher score = better*  *higher rank = better* | | | **Quality Infrastructure Index**  *higher score = better*  *higher rank = better* | | | **Mobile Cellular Subscriptions**  Per 100 people  *higher score = better*  *higher rank = better* | | | **Overall Index (30)**  *higher score = worse*  *higher rank = better* | | |
| **Country** | **Data** | **Global Rank** | **Country** | **Data** | **Global Rank** | **Country** | **Data** | **Global Rank** | **Country** | **Data** | **Global Rank** | **Country** | **Data** | **Global Rank** |
| Global Top | Denmark | 90 | 1 | Sweden | 61.22 | 1 | China | 93.88 | 1 | Hong Kong | 291.91 | 1 | Iceland | 39.79 | 1 |
| Global Median | N. Macedonia | 40 | 90 | Suriname | 42.02 | 96 | N. Macedonia | 34.04 | 80 | Timor Leste | 110.42 | 111 | Tunisia | 102.90 | 108 |
| Global Bottom | South Sudan | 8 | 180 | Somalia | 30.75 | 193 | Laos | 6.20 | 160 | Turks & Caicos | 0.00 | 212 | Eritrea | 148.85 | 217 |
|  |  |  |  |  |  |  |  |  |  |  |  |  |  |  |  |
| Country | **GFS Rank** | **Data** | **Global Rank** | **GFS Rank** | **Data** | **Global Rank** | **GFS Rank** | **Data** | **Global Rank** | **GFS Rank** | **Data** | **Global Rank** | **GFS Rank** | **Data** | **Global Rank** |
| Argentina | 15 | 37 | 99 | 11 | 47.99 | 46 | 17 | 46.80 | 52 | 8 | 132.36 | 49 | 11 | 83.37 | 46 |
| Australia | 2 | 77 | 10 | 8 | 53.86 | 25 | 7 | 74.54 | 10 | 16 | 107.03 | 117 | 1 | 54.73 | 3 |
| Brazil | 17 | 34 | 108 | 14 | 46.80 | 54 | 10 | 67.08 | 17 | 20 | 98.89 | 139 | 21 | 106.33 | 130 |
| China | 11 | 43 | 77 | 7 | 52.85 | 29 | 1 | 93.88 | 1 | 10 | 124.88 | 72 | 15 | 102.70 | 107 |
| Egypt | 21 | 30 | 130 | 22 | 37.73 | 158 | 19 | 44.70 | 57 | 21 | 93.21 | 151 | 12 | 94.70 | 72 |
| Germany | 3 | 75 | 16 | 2 | 56.88 | 9 | 2 | 84.96 | 3 | 6 | 125.23 | 69 | 5 | 65.47 | 14 |
| Hong Kong | 4 | 74 | 17 |  |  |  | 18 | 45.44 | 56 | 1 | 291.91 | 1 | 10 | 83.21 | 44 |
| India | 13 | 38 | 97 | 18 | 42.42 | 93 | 8 | 75.04 | 9 | 23 | 80.65 | 163 | 22 | 110.86 | 144 |
| Indonesia | 16 | 37 | 101 | 15 | 44.01 | 74 | 13 | 60.70 | 28 | 13 | 114.90 | 99 | 13 | 97.60 | 83 |
| Israel | 6 | 64 | 29 | 10 | 49.45 | 44 | 22 | 36.69 | 71 | 4 | 152.22 | 24 | 6 | 67.23 | 18 |
| Japan | 5 | 71 | 22 | 3 | 56.69 | 10 | 5 | 80.71 | 8 | 2 | 167.52 | 13 | 3 | 60.87 | 10 |
| Kenya | 20 | 32 | 123 | 17 | 43.07 | 86 | 16 | 48.62 | 46 | 12 | 121.67 | 80 | 14 | 102.66 | 105 |
| Mexico | 22 | 26 | 142 | 16 | 43.17 | 84 | 12 | 63.86 | 21 | 19 | 100.29 | 136 | 18 | 103.53 | 114 |
| Nigeria | 23 | 26 | 144 | 21 | 38.32 | 147 | 23 | 14.82 | 134 | 18 | 101.69 | 131 | 23 | 120.00 | 176 |
| Philippines | 19 | 33 | 119 | 13 | 44.58 | 68 | 21 | 37.63 | 69 | 5 | 144.04 | 31 | 19 | 103.53 | 115 |
| Poland | 10 | 53 | 54 | 5 | 55.07 | 17 | 14 | 61.85 | 25 | 7 | 131.94 | 51 | 9 | 82.97 | 42 |
| South Africa | 12 | 41 | 85 | 20 | 39.01 | 141 | 11 | 65.60 | 18 | 3 | 167.40 | 15 | 17 | 103.10 | 111 |
| Spain | 9 | 56 | 46 | 6 | 51.88 | 32 | 6 | 73.51 | 12 | 11 | 124.10 | 71 | 7 | 76.00 | 31 |
| Sweden | 1 | 80 | 6 | 1 | 61.22 | 1 | 15 | 58.29 | 34 | 9 | 125.07 | 68 | 2 | 57.90 | 7 |
| Tanzania | 14 | 41 | 86 | 19 | 39.96 | 124 | 20 | 43.26 | 63 | 22 | 91.90 | 152 | 16 | 102.97 | 112 |
| Turkey | 18 | 34 | 112 | 12 | 46.84 | 53 | 9 | 70.62 | 13 | 17 | 105.81 | 124 | 20 | 105.10 | 123 |
| United Kingdom | 8 | 71 | 21 | 4 | 55.61 | 13 | 4 | 81.76 | 5 | 14 | 120.82 | 81 | 4 | 64.47 | 13 |
| United States | 7 | 65 | 28 | 9 | 50.98 | 36 | 3 | 84.83 | 4 | 15 | 110.17 | 113 | 8 | 81.37 | 36 |

|  | Overall Index (7)  *higher score = worse*  *higher rank = better* | | |
| --- | --- | --- | --- |
| **Country** | **Data** | **Global Rank** |
| Global Top | Faroe Islands | 11.00 | 1 |
| Global Median | Armenia | 104.57 | 108 |
| Global Bottom | Eritrea | 171.33 | 117 |
|  |  |  |  |
| Country | **GFS Rank** | **Data** | **Global Rank** |
| Argentina | 11 | 83.00 | 60 |
| Australia | 3 | 37.00 | 11 |
| Brazil | 17 | 104.00 | 106 |
| China | 14 | 100.14 | 90 |
| Egypt | 22 | 132.43 | 168 |
| Germany | 2 | 36.00 | 10 |
| Hong Kong | 6 | 53.57 | 28 |
| India | 18 | 106.00 | 113 |
| Indonesia | 16 | 103.86 | 104 |
| Israel | 9 | 64.43 | 42 |
| Japan | 1 | 28.71 | 6 |
| Kenya | 20 | 124.71 | 149 |
| Mexico | 12 | 90.00 | 70 |
| Nigeria | 21 | 129.43 | 159 |
| Philippines | 13 | 99.43 | 88 |
| Poland | 8 | 64.29 | 41 |
| South Africa | 23 | 133.71 | 170 |
| Spain | 7 | 56.29 | 32 |
| Sweden | 4 | 40.57 | 15 |
| Tanzania | 19 | 121.29 | 143 |
| Turkey | 15 | 103.71 | 103 |
| United Kingdom | 5 | 45.43 | 19 |
| United States | 10 | 65.43 | 43 |

## Supplementary Table 6. Objective Indicators – Global Countries Ranked

| Rank | Geography | | | | | | Climate/Weather | | | | | |
| --- | --- | --- | --- | --- | --- | --- | --- | --- | --- | --- | --- | --- |
| **Altitude**  *ranking = neutral* | | **Latitude**  *ranking = neutral* | | **Surface Area**  Total in sq km  ***ranking = neutral*** | | **Climate Risk Index**  *higher score = worse*  *higher rank = better* | | **Temperature**  Average annual F.  *ranking = neutral* | | **Environmental Performance Index**  *higher score = better*  *higher rank = better* | |
| 1 | Bhutan | 10761.15 | Greenland | 71.71 | Russia | 17098250 | U.A.E. | 0.00 | Burkina Faso | 82.85 | Estonia | 75.7 |
| 2 | Nepal | 10711.94 | Iceland | 64.96 | Canada | 15634410 | Qatar | 0.00 | Mali | 82.85 | Luxembourg | 75.1 |
| 3 | Tajikistan | 10452.76 | Finland | 61.92 | United States | 9831510 | Kuwait | 0.01 | Kiribati | 82.76 | Germany | 74.5 |
| 4 | Kyrgyzstan | 9806.43 | Faroe Islands | 61.89 | China | 9562910 | Libya | 0.05 | South Sudan | 82.70 | Finland | 73.8 |
| 5 | Lesotho | 7089.90 | Russia | 61.52 | Brazil | 8510418 | Maldives | 0.07 | Curacao | 82.40 | UK | 72.6 |
| 6 | Andorra | 6548.56 | Norway | 60.47 | Australia | 7741220 | Liberia | 0.13 | Djibouti | 82.40 | Sweden | 70.3 |
| 7 | Afghanistan | 6181.10 | Sweden | 60.13 | India | 3287260 | Tunisia | 0.16 | Turks & Caicos | 82.40 | Norway | 69.9 |
| 8 | Chile | 6138.45 | Estonia | 58.60 | Argentina | 2780400 | Saudi Arabia | 0.18 | Tuvalu | 82.40 | Austria | 68.9 |
| 9 | China | 6036.75 | Latvia | 56.88 | Kazakhstan | 2724902 | Cote d'Ivoire | 0.19 | Am. Samoa | 82.22 | Switzerland | 67.8 |
| 10 | Armenia | 5879.27 | Denmark | 56.26 | Algeria | 2381741 | Uzbekistan | 0.22 | Senegal | 82.13 | Denmark | 67.7 |
| 11 | Greenland | 5879.27 | Canada | 56.13 | Congo (DRC) | 2344860 | Belarus | 0.22 | Aruba | 82.00 | Greece | 67.3 |
| 12 | Rwanda | 5242.78 | UK | 55.38 | Saudi Arabia | 2149690 | New Zealand | 0.22 | Guam | 81.90 | France | 67 |
| 13 | Mongolia | 5183.73 | Lithuania | 55.17 | Mexico | 1964375 | Egypt | 0.22 | Maldives | 81.77 | Malta | 66.9 |
| 14 | Peru | 5101.71 | Isle of Man | 54.24 | Indonesia | 1916907 | Barbados | 0.25 | Mauritania | 81.77 | Netherlands | 66.9 |
| 15 | Burundi | 4934.38 | Belarus | 53.71 | Sudan | 1878000 | Gabon | 0.28 | Palau | 81.68 | Belgium | 66.8 |
| 16 | Georgia | 4698.16 | Ireland | 53.41 | Libya | 1759540 | Sweden | 0.37 | Benin | 81.59 | Ireland | 65.8 |
| 17 | Switzerland | 4429.13 | Netherlands | 52.13 | Iran | 1745150 | Guinea | 0.41 | Gambia | 81.50 | Czech | 65.5 |
| 18 | Ethiopia | 4363.52 | Poland | 51.92 | Mongolia | 1564116 | Ireland | 0.42 | Marshall Islands | 81.32 | Slovakia | 65.1 |
| 19 | Iran | 4281.50 | Germany | 51.17 | Peru | 1285220 | Jordan | 0.45 | Ghana | 80.96 | Iceland | 64.3 |
| 20 | Lebanon | 4101.05 | Belgium | 50.50 | Chad | 1284000 | Kazakhstan | 0.48 | Bahrain | 80.87 | Poland | 64.2 |
| 21 | Bolivia | 3910.76 | Czech | 49.82 | Niger | 1267000 | Norway | 0.52 | Niger | 80.87 | Lithuania | 64.1 |
| 22 | Namibia | 3743.44 | Luxemburg | 49.82 | Angola | 1246700 | Turkey | 0.60 | Qatar | 80.87 | Spain | 64 |
| 23 | Turkey | 3743.44 | Channel Is | 49.37 | Mali | 1240190 | Mauritius | 0.66 | Seychelles | 80.87 | Australia | 63.1 |
| 24 | Zambia | 3733.60 | Slovakia | 48.67 | South Africa | 1219090 | Suriname | 0.69 | Togo | 80.87 | Slovenia | 62.4 |
| 25 | Fr. Polynesia | 3675.00 | Ukraine | 48.38 | Colombia | 1140619 | Cameroon | 0.83 | Somalia | 80.69 | Croatia | 62.3 |
| 26 | Ecuador | 3664.70 | Kazakhstan | 48.02 | Ethiopia | 1136240 | Botswana | 0.84 | New Caledonia | 80.60 | Portugal | 61.9 |
| 27 | Angola | 3648.29 | Austria | 47.52 | Bolivia | 1098580 | Algeria | 0.86 | U.A.E. | 80.60 | Japan | 61.4 |
| 28 | Mexico | 3645.01 | Moldova | 47.41 | Mauritania | 1030700 | Argentina | 0.92 | Sri Lanka | 80.51 | Canada | 61.1 |
| 29 | Uganda | 3608.92 | Lichtenstein | 47.17 | Egypt | 1001450 | Togo | 0.94 | Sudan | 80.42 | Italy | 60.3 |
| 30 | Montenegro | 3562.99 | Hungary | 47.16 | Tanzania | 947300 | Guinea-Bissau | 0.96 | Brunei | 80.33 | Latvia | 60.2 |
| 31 | Liechtenstein | 3562.00 | Mongolia | 46.86 | Nigeria | 923770 | Chile | 0.96 | Cambodia | 80.24 | Hungary | 59.8 |
| 32 | South Africa | 3392.39 | Switzerland | 46.82 | Venezuela | 912050 | South Korea | 0.98 | Nigeria | 80.24 | Belarus | 58.2 |
| 33 | Tanzania | 3339.90 | France | 46.23 | Namibia | 824290 | Armenia | 1.00 | St Vin. & Gren, | 80.24 | New Zealand | 57.3 |
| 34 | Botswana | 3323.49 | Slovenia | 46.15 | Mozambique | 799380 | Lebanon | 1.03 | Cayman Islands | 80.20 | Romania | 57.3 |
| 35 | Yemen | 3277.56 | Romania | 45.94 | Pakistan | 796100 | Ghana | 1.03 | Guinea-Bissau | 80.15 | United States | 57.2 |
| 36 | Zimbabwe | 3152.89 | Croatia | 45.10 | Turkey | 785350 | Trin. & Tobago | 1.07 | Samoa | 80.06 | Suriname | 56.9 |
| 37 | Jordan | 3018.37 | Serbia | 44.02 | Chile | 756700 | Ukraine | 1.08 | S. Maarten (D) | 80.00 | Bulgaria | 56.2 |
| 38 | Austria | 2985.56 | San Marino | 43.94 | Zambia | 752610 | Iraq | 1.12 | St Martin (Fr) | 80.00 | Bahamas | 55.9 |
| 39 | Morocco | 2982.28 | I | 43.92 | Myanmar | 676590 | Morocco | 1.14 | Grenada | 79.97 | Ant. & Barbuda | 55.6 |
| 40 | Pakistan | 2952.76 | Monaco | 43.75 | Afghanistan | 652860 | Malaysia | 1.35 | Chad | 79.79 | Costa Rica | 55.5 |
| 41 | Eritrea | 2798.56 | Bulgaria | 42.73 | South Sudan | 646883 | Rep. of Congo | 1.45 | Singapore | 79.61 | Ukraine | 54.6 |
| 42 | New Caledonia | 2671.00 | Montenegro | 42.71 | Somalia | 637660 | Uruguay | 1.53 | Cote d'Ivoire | 79.43 | St Vin. & Gren, | 54.2 |
| 43 | Algeria | 2624.67 | Kosovo | 42.60 | Norway | 624500 | Azerbaijan | 1.56 | Thailand | 79.34 | Cyprus | 53.9 |
| 44 | Kosovo | 2624.67 | Andorra | 42.55 | C. African Rep. | 622980 | Ecuador | 1.61 | Sierra Leone | 78.89 | Gabon | 53.3 |
| 45 | Malawi | 2555.77 | Georgia | 42.32 | Ukraine | 603550 | Seychelles | 1.61 | Ant. & Barbuda | 78.80 | Venezuela | 53.3 |
| 46 | Kenya | 2500.00 | Italy | 41.87 | Madagascar | 587295 | Oman | 1.66 | Barbados | 78.80 | Barbados | 53.1 |
| 47 | United States | 2493.44 | N Macedonia | 41.61 | Botswana | 581730 | Georgia | 1.73 | Guyana | 78.80 | Brazil | 53 |
| 48 | Guatemala | 2490.16 | Uzbekistan | 41.38 | Kenya | 580370 | Sierra Leone | 1.79 | Hong Kong | 78.80 | Singapore | 53 |
| 49 | Costa Rica | 2447.51 | Kyrgyzstan | 41.20 | France | 549087 | Israel | 1.79 | N. Mariana Is. | 78.60 | Panama | 52.9 |
| 50 | N. Macedonia | 2431.10 | Albania | 41.15 | Sweden | 528860 | Angola | 1.85 | Indonesia | 78.53 | Cuba | 52.5 |
| 51 | Grenada | 2421.00 | N Zealand | 40.90 | Yemen | 527970 | Nigeria | 1.86 | Micronesia | 78.53 | Trin. & Tobago | 52.5 |
| 52 | Congo (DRC) | 2381.89 | Spain | 40.46 | Thailand | 513120 | Japan | 1.96 | Philippines | 78.53 | Albania | 52.2 |
| 53 | Laos | 2329.40 | North Korea | 40.34 | Spain | 505978 | Senegal | 2.02 | Trin. & Tobago | 78.35 | U.A.E. | 51.6 |
| 54 | Albania | 2322.83 | Azerbaijan | 40.14 | Turkmenistan | 491209 | Canada | 2.03 | Fr. Polynesia | 78.26 | Zimbabwe | 51.6 |
| 55 | Myanmar | 2303.15 | Armenia | 40.07 | Cameroon | 475440 | Benin | 2.09 | Guinea | 78.26 | Ecuador | 51.3 |
| 56 | Honduras | 2244.09 | Portugal | 39.40 | Papua N. G. | 462840 | Panama | 2.13 | Suriname | 78.26 | Oman | 51.3 |
| 57 | Cameroon | 2188.32 | Greece | 39.07 | Uzbekistan | 448924 | Congo (DRC) | 2.16 | Solomon Islands | 78.17 | St Lucia | 51.1 |
| 58 | Papua N. G. | 2188.32 | Turkmenistan | 38.97 | Morocco | 446550 | Cape Verde | 2.31 | Oman | 78.08 | South Korea | 50.6 |
| 59 | Saudi Arabia | 2181.76 | Turkey | 38.96 | Iraq | 435050 | Indonesia | 2.32 | Virgin Is. (US) | 78.00 | N. Macedonia | 50.3 |
| 60 | Spain | 2165.35 | Tajikistan | 38.86 | Greenland | 410450 | Poland | 2.34 | Comoros | 77.99 | Timor Leste | 49.9 |
| 61 | C. African Rep. | 2083.33 | Argentina | 38.42 | Paraguay | 406752 | Tanzania | 2.40 | Eritrea | 77.90 | Serbia | 49.8 |
| 62 | India | 2037.40 | United States | 37.09 | Zimbabwe | 390760 | Mexico | 2.47 | St Lucia | 77.90 | Colombia | 49.7 |
| 63 | Russia | 1968.50 | Japan | 36.20 | Japan | 377969 | Rwanda | 2.66 | Malaysia | 77.72 | Chile | 49.6 |
| 64 | Argentina | 1952.10 | Gibraltar | 36.14 | Germany | 357600 | Finland | 2.67 | Panama | 77.72 | Dominica | 49.3 |
| 65 | Colombia | 1945.54 | Malta | 35.94 | Rep. of Congo | 342000 | Gambia | 2.79 | Kuwait | 77.63 | Botswana | 49.2 |
| 66 | Eq. Guinea | 1893.04 | South Korea | 35.91 | Finland | 338470 | Colombia | 2.93 | Venezuela | 77.63 | Guyana | 49 |
| 67 | Sudan | 1863.52 | China | 35.86 | Vietnam | 331340 | Samoa | 2.95 | Belize | 77.54 | Jamaica | 48.5 |
| 68 | Iceland | 1827.43 | Chile | 35.68 | Malaysia | 330411 | Denmark | 3.00 | Liberia | 77.54 | Brunei | 48.3 |
| 69 | Chad | 1781.50 | Cyprus | 35.13 | Cote d'Ivoire | 322460 | Kyrgyzstan | 3.09 | Palestinian Ter. | 77.54 | Israel | 48 |
| 70 | Italy | 1765.09 | Syria | 34.80 | Poland | 312720 | Jamaica | 3.23 | Papua N. G. | 77.45 | Seychelles | 47.9 |
| 71 | Malaysia | 1765.09 | Afghanistan | 33.94 | Oman | 309500 | Burundi | 3.26 | Timor Leste | 77.45 | Kazakhstan | 47.8 |
| 72 | South Sudan | 1701.00 | Tunisia | 33.89 | Italy | 302070 | Brazil | 3.27 | Tonga | 77.45 | Dominican Rep. | 47.7 |
| 73 | Syria | 1686.35 | Lebanon | 33.85 | Philippines | 300000 | Costa Rica | 3.41 | Br. Virgin Is. | 77.40 | Montenegro | 47.7 |
| 74 | Israel | 1666.67 | Iraq | 33.22 | Burkina Faso | 274200 | Bos. & Herz. | 3.47 | Cuba | 77.36 | Belize | 47.4 |
| 75 | Comoros | 1650.00 | Uruguay | 32.52 | New Zealand | 267710 | Comoros | 3.57 | Gabon | 77.09 | Nicaragua | 47.4 |
| 76 | Bos. & Herz. | 1640.42 | Iran | 32.43 | Gabon | 267670 | Czech | 3.65 | Bangladesh | 77.00 | Georgia | 47.3 |
| 77 | Greece | 1633.86 | Bermuda | 32.32 | Ecuador | 256370 | Switzerland | 3.67 | Nauru | 77.00 | Jordan | 47.3 |
| 78 | Slovenia | 1614.17 | Palestine | 31.95 | Guinea | 245860 | Timor Leste | 3.78 | Brazil | 76.91 | Mauritius | 47.3 |
| 79 | Canada | 1597.77 | Morocco | 31.79 | United Kingdom | 243610 | Austria | 3.79 | Jamaica | 76.91 | Samoa | 47.1 |
| 80 | Am. Samoa | 1581.00 | Israel | 31.05 | Uganda | 241550 | Papua N. G. | 4.06 | C. African Rep. | 76.82 | Argentina | 47 |
| 81 | N. Mariana Is. | 1581.00 | Jordan | 30.59 | Ghana | 238533 | Latvia | 4.07 | Haiti | 76.82 | Qatar | 46.8 |
| 82 | Hong Kong | 1572.00 | South Africa | 30.56 | Romania | 238400 | Paraguay | 4.10 | Nicaragua | 76.82 | Russia | 46.7 |
| 83 | Brunei | 1568.24 | Pakistan | 30.38 | Laos | 236800 | Peru | 4.13 | Bahamas | 76.73 | Zambia | 46.7 |
| 84 | Niger | 1555.12 | Lesotho | 29.61 | Guyana | 214970 | Marshall Islands | 4.40 | Costa Rica | 76.64 | Peru | 46.5 |
| 85 | Serbia | 1551.84 | Kuwait | 29.31 | Belarus | 207630 | Bhutan | 4.51 | Kenya | 76.55 | Moldova | 46.1 |
| 86 | Guinea | 1548.56 | Nepal | 28.39 | Kyrgyzstan | 199950 | Hungary | 4.51 | Saudi Arabia | 76.37 | Bos. & Herz. | 46 |
| 87 | Timor Leste | 1542.00 | Algeria | 28.03 | Senegal | 196710 | Netherlands | 4.59 | Cameroon | 76.28 | Fiji | 46 |
| 88 | Bulgaria | 1541.99 | Bhutan | 27.51 | Syria | 185180 | Australia | 4.66 | Dominican Rep. | 76.19 | Grenada | 45.8 |
| 89 | Haiti | 1541.99 | Egypt | 26.82 | Cambodia | 181040 | Mali | 4.79 | Eq. Guinea | 76.19 | Thailand | 45.7 |
| 90 | Norway | 1509.19 | Eswatini | 26.52 | Uruguay | 176220 | Burkina Faso | 4.86 | Rep. of Congo | 76.19 | Bolivia | 45.3 |
| 91 | Slovakia | 1502.62 | Libya | 26.34 | Suriname | 163820 | Slovakia | 4.88 | Colombia | 76.10 | Tunisia | 45.3 |
| 92 | Uzbekistan | 1476.38 | Bahrain | 25.93 | Tunisia | 163610 | N. Macedonia | 4.93 | Macau | 76.10 | Vanuatu | 45 |
| 93 | Venezuela | 1476.38 | Qatar | 25.35 | Bangladesh | 147570 | Sudan | 5.04 | St Kitts & Nevis | 76.10 | Armenia | 44.9 |
| 94 | El Salvador | 1450.13 | Australia | 25.27 | Nepal | 147180 | South Africa | 5.05 | El Salvador | 76.01 | Kuwait | 44.4 |
| 95 | Madagascar | 1450.13 | Bahamas | 25.03 | Dominican Rep. | 146839 | Dominican Rep. | 5.26 | Vietnam | 76.01 | Kiribati | 44.3 |
| 96 | Philippines | 1450.13 | Saudi Arabia | 23.89 | Tajikistan | 141379 | Zambia | 5.29 | Fiji | 75.92 | Mexico | 44.2 |
| 97 | Japan | 1437.01 | Bangladesh | 23.68 | Greece | 131960 | Uganda | 5.31 | Congo (DRC) | 75.20 | Uruguay | 44.1 |
| 98 | Rep. of Congo | 1410.76 | Mexico | 23.63 | Nicaragua | 130370 | Montenegro | 5.46 | Vanuatu | 75.11 | Namibia | 44 |
| 99 | Czech | 1410.76 | Paraguay | 23.44 | Eritrea | 121630 | Bolivia | 5.60 | Yemen | 74.93 | Senegal | 43.8 |
| 100 | Djibouti | 1410.76 | UAE | 23.42 | North Korea | 120540 | St Vin. & Gren, | 5.80 | Mozambique | 74.84 | Egypt | 43.7 |
| 101 | Dom. Republic | 1391.08 | Namibia | 22.96 | Malawi | 118480 | El Salvador | 5.89 | S. Tome & Prin | 74.75 | Tanzania | 43.6 |
| 102 | Libya | 1387.80 | Hong Kong | 22.40 | Benin | 114760 | Cyprus | 5.98 | India | 74.57 | Bhutan | 43.3 |
| 103 | Romania | 1358.27 | Botswana | 22.33 | Honduras | 112490 | Kiribati | 6.05 | Paraguay | 74.39 | Cote d'Ivoire | 42.9 |
| 104 | Somalia | 1345.14 | Macau | 22.20 | Liberia | 111370 | Nepal | 6.17 | Honduras | 74.30 | Kyrgyzstan | 42.8 |
| 105 | North Korea | 1312.34 | Myanmar | 21.91 | Bulgaria | 111000 | Slovenia | 6.18 | Guatemala | 74.21 | South Africa | 42.7 |
| 106 | Vanuatu | 1305.77 | Turks & Cai | 21.69 | Cuba | 109880 | Madagascar | 6.26 | Cape Verde | 73.94 | Uzbekistan | 42.6 |
| 107 | Vietnam | 1305.77 | Cuba | 21.52 | Guatemala | 108890 | Serbia | 6.45 | Laos | 73.04 | Marshall Islands | 42.5 |
| 108 | New Zealand | 1272.97 | Oman | 21.51 | Iceland | 103000 | Chad | 6.51 | Uganda | 73.04 | Saudi Arabia | 42.5 |
| 109 | Kazakhstan | 1269.69 | Tonga | 21.18 | South Korea | 100440 | Ethiopia | 6.54 | Madagascar | 72.77 | Burkina Faso | 42.2 |
| 110 | Samoa | 1266.00 | Mauritania | 21.01 | U.A.E. | 98648 | Russia | 6.58 | Algeria | 72.50 | Solomon Islands | 42.2 |
| 111 | Azerbaijan | 1259.84 | New Cal | 20.90 | Hungary | 93030 | UK | 6.90 | Mauritius | 72.32 | Guinea-Bissau | 42 |
| 112 | Nigeria | 1246.72 | India | 20.59 | Portugal | 92230 | Luxembourg | 6.93 | Dominica | 72.23 | Iran | 41.8 |
| 113 | Isle of Man | 1240.00 | Mauritius | 20.35 | Jordan | 89318 | Sri Lanka | 7.02 | Tanzania | 72.23 | Algeria | 41.7 |
| 114 | Gabon | 1236.88 | Laos | 19.86 | Croatia | 88070 | Moldova | 7.44 | Bermuda | 72.00 | Eq. Guinea | 41.7 |
| 115 | France | 1230.31 | Cayman Is | 19.51 | Azerbaijan | 86600 | Laos | 7.74 | Ethiopia | 71.96 | El Salvador | 41.6 |
| 116 | Portugal | 1220.47 | Zimbabwe | 19.02 | Serbia | 84990 | Pakistan | 7.95 | Egypt | 71.78 | Rep. of Congo | 41.6 |
| 117 | Indonesia | 1204.07 | Haiti | 18.97 | Austria | 83879 | Estonia | 8.25 | Malawi | 71.42 | Malaysia | 41 |
| 118 | Panama | 1181.10 | Madagascar | 18.77 | Czech | 78871 | Vietnam | 8.41 | Ecuador | 71.33 | Micronesia | 40.8 |
| 119 | Dominica | 1166.00 | Dom Rep | 18.74 | Panama | 75320 | Ant. & Barbuda | 8.50 | Libya | 71.24 | Turkmenistan | 40.6 |
| 120 | Mozambique | 1131.89 | Mozambique | 18.67 | Sierra Leone | 72300 | Guatemala | 9.06 | Australia | 70.97 | Azerbaijan | 40.5 |
| 121 | Mali | 1125.33 | Br Vir Is | 18.42 | Ireland | 70280 | Tajikistan | 9.11 | Angola | 70.79 | Tonga | 40.4 |
| 122 | Cape Verde | 1124.00 | US Vir Is | 18.34 | Georgia | 69700 | Malta | 9.40 | Bolivia | 70.79 | Honduras | 40.2 |
| 123 | Jamaica | 1115.49 | Puerto Rico | 18.22 | Sri Lanka | 65610 | Romania | 9.41 | Botswana | 70.70 | Angola | 40.1 |
| 124 | Croatia | 1085.96 | Jamaica | 18.11 | Lithuania | 65286 | Germany | 9.63 | Eswatini | 70.52 | Niger | 40 |
| 125 | Australia | 1082.68 | Sint Maarten | 18.04 | Latvia | 64590 | St Kitts & Nevis | 9.88 | Iraq | 70.52 | Lebanon | 39.9 |
| 126 | S. Tome & Prin. | 1074.00 | St Martin | 18.04 | Togo | 56790 | Puerto Rico | 9.90 | Zambia | 70.52 | Sierra Leone | 39.9 |
| 127 | Luxembourg | 1066.27 | Fr Poly | 17.68 | Bos. & Herz. | 51210 | Solomon Islands | 10.12 | Mexico | 69.80 | Congo (DRC) | 39.5 |
| 128 | Egypt | 1053.15 | Niger | 17.61 | Costa Rica | 51100 | St Lucia | 10.20 | Zimbabwe | 69.80 | Morocco | 39.5 |
| 129 | Palestinian ter. | 1050.00 | Mali | 17.57 | Slovakia | 49030 | Albania | 10.36 | Pakistan | 68.36 | Paraguay | 39.5 |
| 130 | Brazil | 1049.87 | St Kitts & N | 17.36 | Estonia | 45340 | Lithuania | 10.45 | Namibia | 67.91 | Sudan | 39.1 |
| 131 | Sweden | 1049.87 | N Mariana Is | 17.33 | Denmark | 42920 | Lesotho | 10.72 | Burundi | 67.64 | C. African Rep. | 39 |
| 132 | Iraq | 1023.62 | Belize | 17.19 | Netherlands | 41540 | Mozambique | 10.81 | Peru | 67.28 | Mozambique | 39 |
| 133 | Oman | 1017.06 | Antigua & B | 17.06 | Switzerland | 41291 | Namibia | 11.28 | Israel | 66.56 | Sri Lanka | 38.8 |
| 134 | Turks & Caicos | 1010.00 | Fiji | 16.58 | Bhutan | 38390 | Tuvalu | 11.42 | Malta | 66.56 | Eswatini | 38.7 |
| 135 | Eswatini | 1000.66 | Bolivia | 16.29 | Guinea-Bissau | 36130 | Kenya | 11.46 | Puerto Rico | 66.56 | Cameroon | 38.6 |
| 136 | Faroe Islands | 980.00 | Cape Verdi | 16.00 | Moldova | 33850 | Zimbabwe | 11.53 | Tunisia | 66.56 | Comoros | 38.2 |
| 137 | Nicaragua | 977.69 | Thailand | 15.87 | Belgium | 30689 | Malawi | 11.60 | Greenland | 66.02 | Maldives | 38.1 |
| 138 | Burkina Faso | 974.41 | Guatemala | 15.78 | Lesotho | 30360 | Nicaragua | 12.02 | Gibraltar | 65.80 | Cape Verde | 38 |
| 139 | St Vin. & Gren, | 965.00 | Yemen | 15.55 | Armenia | 29740 | France | 12.14 | Cyprus | 65.21 | Nigeria | 37.9 |
| 140 | San Marino | 964.00 | Chad | 15.45 | Solomon Islands | 28900 | Bangladesh | 12.36 | Jordan | 64.94 | Benin | 37.8 |
| 141 | Thailand | 941.60 | Dominica | 15.41 | Albania | 28750 | Thailand | 12.48 | Rwanda | 64.13 | Gambia | 37.6 |
| 142 | South Korea | 925.20 | Vanuatu | 15.38 | Eq. Guinea | 28050 | Guyana | 12.54 | South Africa | 63.95 | Mongolia | 37.2 |
| 143 | Sierra Leone | 915.35 | Honduras | 15.20 | Burundi | 27830 | Niger | 12.95 | Syria | 63.95 | Turkey | 37.2 |
| 144 | Mauritania | 905.51 | Eritrea | 15.18 | Haiti | 27750 | Tonga | 13.39 | Uruguay | 63.59 | Ghana | 36.9 |
| 145 | Benin | 895.67 | Senegal | 14.50 | Rwanda | 26340 | Cambodia | 13.53 | Iran | 63.05 | Kenya | 36.9 |
| 146 | Germany | 862.86 | Am Samoa | 14.27 | N. Macedonia | 25710 | Bulgaria | 13.58 | Morocco | 62.78 | Lesotho | 36.9 |
| 147 | Puerto Rico | 856.00 | Brazil | 14.24 | Djibouti | 23200 | Micronesia | 13.65 | Lebanon | 61.52 | Papua N. G. | 36.9 |
| 148 | Cote d'Ivoire | 820.21 | Vietnam | 14.06 | Belize | 22970 | Eswatini | 13.78 | Greece | 59.72 | Guinea | 36.5 |
| 149 | Suriname | 807.09 | St Lucia | 13.91 | Israel | 22070 | Belize | 14.00 | Portugal | 59.27 | Haiti | 36.4 |
| 150 | Tunisia | 807.09 | El Salvador | 13.79 | El Salvador | 21040 | Croatia | 14.03 | Turkmenistan | 59.18 | Ethiopia | 36.3 |
| 151 | Liberia | 797.24 | Samoa | 13.76 | Slovenia | 20480 | Mongolia | 14.42 | Argentina | 58.64 | S. Tome & Prin | 36.2 |
| 152 | Solomon Islands | 787.00 | Guam | 13.44 | New Caledonia | 18580 | Belgium | 14.71 | Monaco | 56.39 | Chad | 35.9 |
| 153 | Virgin Is. (US) | 778.00 | Gambia | 13.44 | Fiji | 18270 | Grenada | 14.75 | Italy | 56.21 | Uganda | 35.8 |
| 154 | Togo | 774.28 | Malawi | 13.25 | Kuwait | 17820 | Djibouti | 14.86 | Spain | 55.94 | Togo | 35.7 |
| 155 | Turkmenistan | 754.59 | Barbados | 13.19 | Eswatini | 17360 | Mauritania | 15.50 | Myanmar | 55.49 | China | 35.4 |
| 156 | Sri Lanka | 748.03 | Zambia | 13.13 | Timor Leste | 14870 | Haiti | 15.88 | Afghanistan | 54.68 | Bahrain | 35.3 |
| 157 | Fiji | 703.00 | St Vin & G | 12.98 | Bahamas | 13880 | United States | 16.78 | Channel Islands | 54.15 | Malawi | 35.1 |
| 158 | Gibraltar | 699.00 | Philippines | 12.88 | Montenegro | 13810 | Portugal | 16.95 | Uzbekistan | 53.69 | Mauritania | 34.6 |
| 159 | Mauritius | 685.00 | Nicaragua | 12.87 | Faroe Islands | 12960 | Fiji | 17.06 | Isle of Man | 53.60 | Mali | 34.5 |
| 160 | Guyana | 679.13 | Sudan | 12.86 | Vanuatu | 12190 | Philippines | 18.75 | Azerbaijan | 53.51 | Libya | 34.3 |
| 161 | St Kitts & Nevis | 633.00 | Cambodia | 12.57 | Qatar | 11490 | Vanuatu | 19.10 | Lesotho | 53.33 | Rwanda | 33.9 |
| 162 | Ghana | 623.36 | Aruba | 12.52 | Gambia | 11300 | Spain | 19.81 | San Marino | 53.33 | Indonesia | 33.6 |
| 163 | Aruba | 620.00 | Grenada | 12.26 | Jamaica | 10990 | Greece | 20.21 | N. Macedonia | 53.10 | Burundi | 33.5 |
| 164 | Belgium | 593.83 | Burkina Faso | 12.24 | Kosovo | 10890 | India | 20.64 | South Korea | 52.70 | Nepal | 33.1 |
| 165 | Paraguay | 583.99 | Curacao | 12.17 | Lebanon | 10450 | Italy | 25.30 | Albania | 52.52 | Guatemala | 32.5 |
| 166 | Ukraine | 574.15 | Comoros | 11.88 | Cyprus | 9250 | Myanmar | 28.47 | Japan | 52.07 | Djibouti | 32.3 |
| 167 | Belize | 567.59 | Djibouti | 11.83 | Puerto Rico | 8870 | Honduras | 29.59 | Turkey | 51.98 | Tajikistan | 32.3 |
| 168 | Poland | 567.59 | Guinea-B | 11.80 | Palestinian Ter. | 6020 | China | 31.32 | Croatia | 51.62 | Philippines | 32.1 |
| 169 | Belarus | 557.74 | Angola | 11.20 | Brunei | 5770 | Dominica | 56.71 | France | 51.26 | Cambodia | 31.2 |
| 170 | St Lucia | 552.00 | Trin & Tob | 10.69 | Trin. & Tobago | 5130 | Afghanistan | . | Bulgaria | 50.99 | Afghanistan | 31 |
| 171 | Finland | 538.06 | Guinea | 9.95 | Bermuda | 4290 | Am. Samoa | . | Montenegro | 50.99 | Iraq | 30.3 |
| 172 | U.A.E. | 488.85 | Costa Rica | 9.75 | Cape Verde | 4030 | Andorra | . | New Zealand | 50.99 | Madagascar | 30.1 |
| 173 | Hungary | 469.16 | Solomon Is | 9.65 | Fr. Polynesia | 3471 | Aruba | . | Serbia | 50.99 | Eritrea | 29 |
| 174 | Moldova | 456.04 | Benin | 9.31 | Samoa | 2840 | Bahamas | . | Bos. & Herz. | 49.73 | Bangladesh | 28.1 |
| 175 | Cambodia | 413.39 | Peru | 9.19 | Luxembourg | 2590 | Bahrain | . | Hungary | 49.55 | India | 27.6 |
| 176 | Ireland | 387.14 | Ethiopia | 9.15 | Mauritius | 2010 | Bermuda | . | Belgium | 49.19 | Myanmar | 27.1 |
| 177 | Lithuania | 360.89 | Nigeria | 9.08 | Comoros | 1861 | Br. Virgin Is. | . | Kosovo | 49.10 | Laos | 26.3 |
| 178 | Uruguay | 357.61 | Timor Leste | 8.87 | Hong Kong | 1110 | Brunei | . | Moldova | 49.01 | Pakistan | 25.5 |
| 179 | Cuba | 354.33 | Togo | 8.62 | S. Tome & Prin | 960 | C. African Rep. | . | Ireland | 48.74 | Vietnam | 24.6 |
| 180 | Kuwait | 354.33 | Panama | 8.54 | Turks & Caicos | 950 | Cayman Islands | . | Netherlands | 48.65 | Am. Samoa | . |
| 181 | Barbados | 350.00 | Sierra Leone | 8.46 | Kiribati | 810 | Channel Islands | . | Slovenia | 48.02 | Andorra | . |
| 182 | Guam | 350.00 | Ghana | 7.95 | Bahrain | 790 | Cuba | . | Romania | 47.84 | Aruba | . |
| 183 | Micronesia | 350.00 | Sri Lanka | 7.87 | Tonga | 750 | Curacao | . | Luxembourg | 47.57 | Bermuda | . |
| 184 | Seychelles | 299.00 | Cote d'Ivoire | 7.54 | Dominica | 750 | Eq. Guinea | . | United States | 47.39 | Br. Virgin Is. | . |
| 185 | Cyprus | 298.56 | Palau | 7.51 | Singapore | 728 | Eritrea | . | Germany | 47.30 | Cayman Islands | . |
| 186 | Latvia | 285.43 | Micronesia | 7.43 | Micronesia | 700 | Faroe Islands | . | Chile | 47.21 | Channel Islands | . |
| 187 | Macau | 282.00 | Cameroon | 7.37 | St Lucia | 620 | Fr. Polynesia | . | UK | 47.21 | Curacao | . |
| 188 | Bangladesh | 278.87 | Marshall Is | 7.13 | Isle of Man | 570 | Gibraltar | . | Ukraine | 46.94 | Faroe Islands | . |
| 189 | Malta | 273.00 | Tuvalu | 7.11 | Guam | 540 | Greenland | . | Nepal | 46.58 | Fr. Polynesia | . |
| 190 | Trin. & Tobago | 272.31 | South Sudan | 6.88 | Andorra | 470 | Guam | . | Poland | 46.13 | Gibraltar | . |
| 191 | UK | 246.06 | CAR | 6.61 | N. Mariana Is. | 460 | Hong Kong | . | Andorra | 45.68 | Greenland | . |
| 192 | Guinea-Bissau | 229.66 | Liberia | 6.43 | Palau | 460 | Iceland | . | Czech | 45.59 | Guam | . |
| 193 | Senegal | 226.38 | Venezuela | 6.42 | Seychelles | 460 | Iran | . | Denmark | 45.50 | Hong Kong | . |
| 194 | Tonga | 212.00 | Tanzania | 6.37 | Curacao | 444 | Isle of Man | . | Bhutan | 45.32 | Isle of Man | . |
| 195 | Estonia | 200.13 | Papua N G | 6.31 | Ant. & Barbuda | 440 | Kosovo | . | Armenia | 44.87 | Kosovo | . |
| 196 | Palau | 183.00 | Somalia | 5.15 | Barbados | 430 | Liechtenstein | . | China | 44.51 | Liberia | . |
| 197 | Monaco | 152.00 | Guyana | 4.86 | St Vin. & Gren, | 390 | Macau | . | Slovakia | 44.24 | Liechtenstein | . |
| 198 | Br. Virgin Is. | 115.00 | Seychelles | 4.68 | Virgin Is. (US) | 350 | Monaco | . | Kazakhstan | 43.52 | Macau | . |
| 199 | Ant. & Barbuda | 112.00 | Colombia | 4.57 | Grenada | 340 | N. Mariana Is. | . | Faroe Islands | 43.50 | Monaco | . |
| 200 | Denmark | 111.55 | Brunei | 4.54 | Malta | 320 | Nauru | . | Austria | 43.43 | N. Mariana Is. | . |
| 201 | Gambia | 111.55 | Malaysia | 4.21 | Maldives | 300 | New Caledonia | . | Lithuania | 43.16 | Nauru | . |
| 202 | Bahamas | 102.00 | DRC | 4.04 | Cayman Islands | 264 | North Korea | . | Belarus | 43.07 | New Caledonia | . |
| 203 | Netherlands | 98.43 | Suriname | 3.92 | St Kitts & Nevis | 260 | Palau | . | Georgia | 42.44 | North Korea | . |
| 204 | Qatar | 91.86 | Burundi | 3.37 | Am. Samoa | 200 | Palestinian Ter. | . | North Korea | 42.26 | Palau | . |
| 205 | Nauru | 85.00 | Kiribati | 3.37 | Channel Islands | 198 | S. Maarten (D) | . | Liechtenstein | 42.17 | Palestinian Ter. | . |
| 206 | Cayman Islands | 75.00 | Maldives | 3.20 | Aruba | 180 | S. Tome & Prin | . | Latvia | 42.08 | Puerto Rico | . |
| 207 | Channel Islands | 75.00 | Rwanda | 1.94 | Marshall Islands | 180 | San Marino | . | Switzerland | 41.90 | S. Maarten (D) | . |
| 208 | S. Maarten (D) | 60.00 | Ecuador | 1.83 | Liechtenstein | 160 | Singapore | . | Estonia | 41.18 | San Marino | . |
| 209 | St Martin (Fr) | 60.00 | Eq Guinea | 1.65 | Br. Virgin Is. | 150 | Somalia | . | Sweden | 35.78 | Somalia | . |
| 210 | Singapore | 49.21 | Uganda | 1.37 | Monaco | 75 | South Sudan | . | Tajikistan | 35.60 | South Sudan | . |
| 211 | Bermuda | 46.00 | Singapore | 1.35 | San Marino | 60 | St Martin (Fr) | . | Iceland | 35.15 | St Kitts & Nevis | . |
| 212 | Bahrain | 44.00 | Gabon | 0.80 | St Martin (Fr) | 50 | Syria | . | Finland | 35.06 | St Martin (Fr) | . |
| 213 | Curacao | 23.00 | Indonesia | 0.79 | S. Maarten (D) | 34 | Turkmenistan | . | Kyrgyzstan | 34.79 | Syria | . |
| 214 | Kiribati | 6.56 | Nauru | 0.52 | Macau | 33 | Turks & Caicos | . | Norway | 34.70 | Turks & Caicos | . |
| 215 | Marshall Islands | 6.56 | Congo Brazz | 0.23 | Tuvalu | 30 | Venezuela | . | Mongolia | 30.74 | Tuvalu | . |
| 216 | Tuvalu | 5.91 | S Tome & P | 0.19 | Nauru | 20 | Virgin Is. (US) | . | Russia | 22.82 | Virgin Is. (US) | . |
| 217 | Maldives | 4.92 | Kenya | 0.02 | Gibraltar | 10 | Yemen | . | Canada | 22.37 | Yemen | . |

## Supplementary Table 6 (cont.). Objective Indicators – Global Countries Ranked

| Rank | Climate/Weather | | Population | | | | | | | | | | | |
| --- | --- | --- | --- | --- | --- | --- | --- | --- | --- | --- | --- | --- | --- | --- |
| **Air quality**  PM2.5 (µg/m³)  *higher score = worse*  *higher rank = better* | | **Population Density**  People per sq. km of  land area  *ranking = neutral* | | **Population Growth**  Annual %  *ranking = neutral* | | | **Population Ages 0-14**  % of total population  *ranking = neutral* | | **Net migration**  *ranking = neutral* | | **Fertility rate**  *higher score = better*  *higher rank = better* | | |
| 1 | St Lucia | 2.10 | Macau | 20681.82 | | Oman | 6.53 | C. African Rep. | 49.17 | United States | 1286132 | | Niger | 6.64 |
| 2 | Bahamas | 2.30 | Monaco | 18680.90 | | Kuwait | 5.59 | Niger | 46.97 | Ukraine | 1146012 | | Angola | 5.70 |
| 3 | Bermuda | 2.50 | Singapore | 7851.01 | | Syria | 4.92 | Chad | 46.74 | Syria | 546494 | | Congo (DRC) | 5.49 |
| 4 | Fr. Polynesia | 2.50 | Hong Kong | 7060.10 | | Singapore | 4.86 | Somalia | 46.68 | UK | 417114 | | Mali | 5.35 |
| 5 | Virgin Is. (US) | 2.60 | Gibraltar | 3685.80 | | Chad | 4.57 | Mali | 46.46 | Canada | 368599 | | Benin | 5.34 |
| 6 | Barbados | 3.10 | Bahrain | 1929.99 | | South Sudan | 4.11 | Congo (DRC) | 46.09 | U.A.E. | 278439 | | Chad | 5.24 |
| 7 | Ant. & Barbuda | 3.10 | Maldives | 1747.02 | | U.A.E. | 3.98 | Burundi | 45.36 | Chad | 204040 | | Uganda | 5.17 |
| 8 | Puerto Rico | 2.70 | Malta | 1660.97 | | Malta | 3.92 | Mozambique | 44.75 | Iran | 190156 | | Somalia | 5.12 |
| 9 | Jamaica | 3.10 | Bangladesh | 1301.26 | | Bahrain | 3.38 | Angola | 44.57 | Malaysia | 174770 | | South Sudan | 5.09 |
| 10 | Grenada | 3.20 | S. Maarten (D) | 1239.38 | | Saudi Arabia | 3.33 | Uganda | 43.94 | South Africa | 166972 | | Burundi | 4.90 |
| 11 | Iceland | 4.00 | Bermuda | 1199.06 | | Niger | 3.29 | Afghanistan | 43.23 | Oman | 154219 | | Guinea | 4.78 |
| 12 | New Zealand | 4.40 | Channel Islands | 842.13 | | Congo (DRC) | 3.26 | Mauritania | 43.04 | Japan | 153357 | | Mozambique | 4.66 |
| 13 | Estonia | 4.60 | Palestinian Ter. | 798.00 | | Angola | 3.08 | Tanzania | 42.72 | Colombia | 141643 | | Guinea-Bissau | 4.62 |
| 14 | Australia | 4.50 | Barbados | 656.55 | | Somalia | 3.08 | Burkina Faso | 42.40 | Australia | 138510 | | Nigeria | 4.52 |
| 15 | Lebanon | 5.10 | Mauritius | 632.21 | | Yemen | 3.01 | Zambia | 41.96 | Egypt | 123884 | | Sudan | 4.47 |
| 16 | Finland | 5.20 | Aruba | 596.17 | | Mali | 2.97 | Benin | 41.84 | Saudi Arabia | 122170 | | Cameroon | 4.44 |
| 17 | Sweden | 5.30 | Nauru | 590.05 | | Mauritania | 2.97 | Cameroon | 41.76 | Netherlands | 121628 | | Afghanistan | 4.43 |
| 18 | Andorra | 6.00 | St Martin (Fr) | 577.40 | | Mozambique | 2.95 | Nigeria | 41.49 | Spain | 111674 | | Zambia | 4.42 |
| 19 | Brunei | 6.00 | San Marino | 562.58 | | Canada | 2.93 | Zimbabwe | 41.32 | Italy | 95246 | | Tanzania | 4.27 |
| 20 | Ireland | 6.50 | Lebanon | 561.53 | | Iceland | 2.93 | Malawi | 41.32 | France | 90527 | | Togo | 4.13 |
| 21 | Trin. & Tobago | 6.10 | Rwanda | 553.35 | | Tanzania | 2.90 | Cote d'Ivoire | 41.28 | South Korea | 75963 | | Eq. Guinea | 4.12 |
| 22 | Seychelles | 6.10 | South Korea | 529.43 | | Uganda | 2.80 | Guinea | 41.24 | Kuwait | 61624 | | Senegal | 4.06 |
| 23 | Liechtenstein | 6.50 | Netherlands | 525.72 | | Zambia | 2.79 | Yemen | 41.23 | Chile | 58316 | | Burkina Faso | 4.02 |
| 24 | Norway | 6.60 | Burundi | 518.73 | | Burundi | 2.73 | Rep. of Congo | 40.88 | Sweden | 50115 | | Timor Leste | 3.98 |
| 25 | Canada | 6.70 | India | 479.43 | | Ireland | 2.71 | Gambia | 40.73 | Qatar | 46105 | | C. African Rep. | 3.94 |
| 26 | Portugal | 6.80 | Comoros | 448.25 | | Cameroon | 2.64 | Sudan | 40.65 | Norway | 44356 | | Liberia | 3.93 |
| 27 | Costa Rica | 7.00 | Israel | 433.06 | | Ethiopia | 2.60 | Liberia | 40.00 | Switzerland | 40099 | | Ethiopia | 3.84 |
| 28 | United States | 7.10 | Haiti | 417.40 | | Malawi | 2.57 | Togo | 39.88 | Ireland | 39059 | | Papua N. G. | 3.79 |
| 29 | Denmark | 7.20 | Belgium | 383.03 | | Hong Kong | 2.55 | South Sudan | 39.85 | Germany | 36954 | | Rep. of Congo | 3.79 |
| 30 | Switzerland | 7.30 | Philippines | 382.21 | | Benin | 2.52 | Madagascar | 39.57 | Belgium | 36243 | | Sierra Leone | 3.61 |
| 31 | UK | 7.40 | Puerto Rico | 363.03 | | Namibia | 2.51 | Ethiopia | 39.37 | Ethiopia | 30069 | | Ghana | 3.56 |
| 32 | Luxembourg | 7.50 | Sri Lanka | 358.57 | | Cote d'Ivoire | 2.50 | Guinea-Bissau | 39.24 | Finland | 26894 | | Tajikistan | 3.56 |
| 33 | France | 8.10 | Grenada | 343.86 | | Madagascar | 2.46 | Palestinian Ter. | 39.14 | Somalia | 26859 | | Gambia | 3.52 |
| 34 | Cayman Islands | 8.50 | Japan | 343.28 | | Guinea | 2.46 | Samoa | 38.73 | Denmark | 25639 | | Madagascar | 3.47 |
| 35 | Japan | 8.60 | Curacao | 337.83 | | Palestinian Ter. | 2.46 | Eritrea | 38.68 | Thailand | 23321 | | Zimbabwe | 3.47 |
| 36 | Argentina | 8.70 | Tuvalu | 333.07 | | Australia | 2.45 | Senegal | 38.63 | Bahrain | 22699 | | Eritrea | 3.43 |
| 37 | Spain | 8.70 | Vietnam | 318.03 | | Rep. of Congo | 2.42 | Vanuatu | 38.61 | Portugal | 20648 | | Cote d'Ivoire | 3.40 |
| 38 | Belgium | 8.90 | Pakistan | 316.13 | | Eq. Guinea | 2.41 | Sierra Leone | 38.53 | Singapore | 20011 | | Mauritania | 3.40 |
| 39 | Netherlands | 8.90 | Guam | 305.89 | | Solomon Islands | 2.40 | S. Tome & Prin | 38.28 | New Zealand | 18766 | | Pakistan | 3.32 |
| 40 | Fiji | 9.00 | El Salvador | 303.10 | | Senegal | 2.39 | Nauru | 38.18 | Peru | 18406 | | S. Tome & Prin | 3.31 |
| 41 | Germany | 9.00 | Virgin Is. (US) | 301.18 | | Togo | 2.33 | Rwanda | 37.73 | Hungary | 16223 | | Gabon | 3.21 |
| 42 | Haiti | 9.10 | Cayman Islands | 298.30 | | Vanuatu | 2.32 | Eq. Guinea | 37.48 | South Sudan | 15374 | | Malawi | 3.19 |
| 43 | Monaco | 9.10 | St Lucia | 293.08 | | Gambia | 2.30 | Kenya | 37.45 | Turkmenistan | 14646 | | Kenya | 3.16 |
| 44 | Latvia | 9.20 | UK | 280.21 | | Burkina Faso | 2.27 | Comoros | 37.40 | Puerto Rico | 11561 | | Rwanda | 3.14 |
| 45 | Ukraine | 9.20 | Trin. & Tobago | 266.24 | | Gibraltar | 2.27 | Solomon Islands | 37.36 | Azerbaijan | 10864 | | Iraq | 3.10 |
| 46 | Bolivia | 10.00 | Jamaica | 262.16 | | Iraq | 2.25 | Namibia | 37.29 | Israel | 10612 | | Libya | 3.00 |
| 47 | Ecuador | 9.70 | St Vin. & Gren, | 261.66 | | Guinea-Bissau | 2.25 | Iraq | 37.09 | Austria | 8813 | | Algeria | 2.94 |
| 48 | Russia | 9.80 | Seychelles | 260.60 | | Liberia | 2.20 | Pakistan | 37.04 | Cyprus | 8138 | | Israel | 2.92 |
| 49 | Lesotho | 10.10 | Gambia | 260.52 | | Gabon | 2.20 | Gabon | 36.66 | Cote d'Ivoire | 7838 | | Namibia | 2.89 |
| 50 | Panama | 10.10 | Kuwait | 257.56 | | Rwanda | 2.20 | Tajikistan | 36.51 | Zambia | 7381 | | Jordan | 2.87 |
| 51 | Lithuania | 10.10 | Br. Virgin Is. | 255.46 | | Sierra Leone | 2.20 | Ghana | 36.18 | Panama | 6706 | | Lesotho | 2.85 |
| 52 | Liberia | 10.10 | Luxembourg | 253.69 | | Afghanistan | 2.14 | Tonga | 35.62 | Malta | 6323 | | Yemen | 2.82 |
| 53 | Austria | 10.20 | Liechtenstein | 246.83 | | Nigeria | 2.10 | Kiribati | 34.93 | Luxembourg | 5677 | | Tuvalu | 2.78 |
| 54 | Tuvalu | 10.30 | Nigeria | 245.01 | | Israel | 2.06 | Lesotho | 34.92 | Namibia | 4211 | | Solomon Islands | 2.77 |
| 55 | Kiribati | 11.00 | Am. Samoa | 241.71 | | Belize | 2.06 | Marshall Islands | 34.71 | Eq. Guinea | 3891 | | Uzbekistan | 2.76 |
| 56 | Micronesia | 11.00 | Germany | 239.86 | | New Zealand | 2.05 | Timor Leste | 34.23 | Kyrgyzstan | 3645 | | Philippines | 2.75 |
| 57 | Tonga | 11.00 | Uganda | 235.95 | | Uzbekistan | 2.02 | Papua N. G. | 33.80 | Iceland | 3543 | | Guam | 2.73 |
| 58 | Malawi | 11.10 | S. Tome & Prin | 235.73 | | Luxembourg | 2.02 | Eswatini | 33.67 | Argentina | 3454 | | Syria | 2.69 |
| 59 | Marshall Islands | 11.10 | Dominican Rep. | 233.01 | | Tajikistan | 2.02 | Kyrgyzstan | 32.67 | Libya | 3448 | | Marshall Islands | 2.67 |
| 60 | San Marino | 11.10 | Qatar | 231.27 | | Cayman Islands | 2.00 | Mongolia | 32.64 | Slovenia | 3319 | | Egypt | 2.65 |
| 61 | Singapore | 11.40 | Marshall Islands | 222.65 | | S. Tome & Prin | 2.00 | Tuvalu | 32.60 | Lithuania | 2617 | | Tonga | 2.65 |
| 62 | Greece | 11.50 | Switzerland | 222.15 | | Kenya | 1.98 | Egypt | 32.44 | Seychelles | 1747 | | Oman | 2.64 |
| 63 | Samoa | 11.50 | North Korea | 218.66 | | Comoros | 1.92 | Botswana | 32.28 | Georgia | 1745 | | Comoros | 2.61 |
| 64 | Uruguay | 11.50 | Malawi | 218.17 | | Ghana | 1.91 | Guatemala | 32.14 | Macau | 1620 | | Kazakhstan | 2.58 |
| 65 | Solomon Islands | 11.90 | Ant. & Barbuda | 211.00 | | Turkmenistan | 1.84 | Micronesia | 32.13 | Solomon Islands | 1610 | | N. Mariana Is. | 2.56 |
| 66 | Malta | 11.70 | Nepal | 207.29 | | Papua N. G. | 1.81 | Turkmenistan | 31.67 | Trin. & Tobago | 1334 | | Nauru | 2.55 |
| 67 | Papua N. G. | 12.00 | Italy | 199.56 | | Czech | 1.78 | Haiti | 31.57 | Gabon | 1105 | | Vanuatu | 2.53 |
| 68 | Maldives | 12.20 | St Kitts & Nevis | 179.65 | | Eritrea | 1.77 | Jordan | 31.23 | Bahamas | 1018 | | Guatemala | 2.52 |
| 69 | Vanuatu | 12.00 | Andorra | 169.59 | | Kyrgyzstan | 1.77 | Honduras | 31.00 | Andorra | 988 | | Kyrgyzstan | 2.45 |
| 70 | Suriname | 12.50 | Togo | 167.12 | | Br. Virgin Is. | 1.72 | Uzbekistan | 30.87 | Costa Rica | 967 | | Haiti | 2.44 |
| 71 | Czech | 12.70 | Guatemala | 166.55 | | Honduras | 1.71 | Algeria | 30.64 | Cayman Islands | 896 | | Eswatini | 2.37 |
| 72 | Bulgaria | 12.40 | Kosovo | 165.00 | | Egypt | 1.69 | Laos | 30.56 | Channel Islands | 747 | | Panama | 2.35 |
| 73 | Cyprus | 12.80 | Kiribati | 161.07 | | Zimbabwe | 1.68 | Syria | 30.34 | Gibraltar | 598 | | Botswana | 2.34 |
| 74 | Hungary | 12.90 | Micronesia | 160.16 | | Botswana | 1.64 | Bolivia | 30.14 | S. Maarten (D) | 558 | | Honduras | 2.33 |
| 75 | Kosovo | 12.90 | China | 150.42 | | Jordan | 1.61 | Cambodia | 30.11 | Bulgaria | 524 | | Samoa | 2.33 |
| 76 | Angola | 13.00 | Isle of Man | 147.60 | | Estonia | 1.58 | Djibouti | 29.57 | Curacao | 513 | | Faroe Islands | 2.27 |
| 77 | Slovakia | 13.60 | Denmark | 147.58 | | Kiribati | 1.57 | Kazakhstan | 29.54 | Belize | 490 | | South Africa | 2.27 |
| 78 | Dominican Rep. | 13.70 | Indonesia | 147.33 | | Pakistan | 1.55 | Guyana | 29.32 | Faroe Islands | 488 | | Morocco | 2.25 |
| 79 | Colombia | 13.80 | Tonga | 145.89 | | Guatemala | 1.54 | Nicaragua | 29.20 | New Caledonia | 455 | | Laos | 2.24 |
| 80 | Croatia | 13.80 | Ghana | 145.69 | | Algeria | 1.50 | Paraguay | 28.78 | Br. Virgin Is. | 212 | | Ecuador | 2.21 |
| 81 | Kenya | 14.30 | Cyprus | 144.09 | | Kazakhstan | 1.46 | Nepal | 28.71 | Liechtenstein | 206 | | Fiji | 2.21 |
| 82 | Italy | 14.20 | U.A.E. | 141.86 | | S. Maarten (D) | 1.44 | Philippines | 28.61 | Isle of Man | 177 | | Kuwait | 2.21 |
| 83 | Albania | 14.50 | Thailand | 140.41 | | Andorra | 1.43 | Bangladesh | 28.36 | Turks & Caicos | 176 | | Bolivia | 2.20 |
| 84 | Mauritius | 14.50 | Czech | 138.29 | | Lithuania | 1.40 | Libya | 27.96 | Aruba | 141 | | Micronesia | 2.19 |
| 85 | Moldova | 14.70 | Cape Verde | 128.97 | | Laos | 1.39 | Israel | 27.61 | Monaco | 110 | | Venezuela | 2.18 |
| 86 | Nicaragua | 14.80 | Jordan | 126.77 | | Djibouti | 1.38 | Am. Samoa | 27.51 | Mongolia | 83 | | Cambodia | 2.17 |
| 87 | Philippines | 14.80 | France | 124.31 | | Bolivia | 1.37 | Fiji | 27.39 | San Marino | 37 | | Argentina | 2.15 |
| 88 | Poland | 14.80 | Azerbaijan | 122.71 | | Nicaragua | 1.37 | Belize | 26.99 | Ant. & Barbuda | 9 | | Dominican Rep. | 2.15 |
| 89 | Jordan | 14.90 | Benin | 122.02 | | Mongolia | 1.37 | Dominican Rep. | 26.91 | Brunei | 0 | | Kiribati | 2.15 |
| 90 | Brazil | 14.90 | Syria | 121.30 | | Portugal | 1.37 | Lebanon | 26.72 | Bermuda | -5 | | Peru | 2.15 |
| 91 | Bhutan | 15.10 | Poland | 120.30 | | South Africa | 1.33 | Cape Verde | 26.37 | St Kitts & Nevis | -7 | | Sri Lanka | 2.13 |
| 92 | Kazakhstan | 15.10 | Sierra Leone | 114.67 | | Sudan | 1.33 | Venezuela | 26.15 | St Lucia | -7 | | Djibouti | 2.11 |
| 93 | Georgia | 15.10 | Portugal | 113.90 | | Panama | 1.31 | South Africa | 26.08 | Djibouti | -11 | | Cape Verde | 2.10 |
| 94 | Gabon | 15.20 | Egypt | 113.13 | | Cambodia | 1.28 | Morocco | 26.04 | Palau | -14 | | Bangladesh | 2.07 |
| 95 | Honduras | 15.20 | Slovakia | 112.97 | | Switzerland | 1.26 | Guam | 26.02 | Vanuatu | -43 | | Am. Samoa | 2.06 |
| 96 | Slovenia | 15.20 | Ethiopia | 111.10 | | Malaysia | 1.23 | Suriname | 25.95 | Barbados | -70 | | Belize | 2.05 |
| 97 | Romania | 15.30 | Turkey | 110.42 | | Paraguay | 1.23 | Panama | 25.28 | Nauru | -121 | | Guyana | 2.05 |
| 98 | Turkey | 15.30 | Austria | 109.57 | | Spain | 1.23 | Oman | 25.23 | Grenada | -192 | | Jamaica | 2.05 |
| 99 | Algeria | 15.40 | Cuba | 106.55 | | Bangladesh | 1.22 | El Salvador | 25.21 | Dominica | -200 | | India | 2.03 |
| 100 | Paraguay | 15.90 | Hungary | 105.68 | | Iran | 1.20 | India | 25.06 | Bhutan | -277 | | Vietnam | 2.03 |
| 101 | Palau | 16.00 | Malaysia | 105.60 | | Haiti | 1.16 | Ecuador | 25.00 | Tuvalu | -280 | | El Salvador | 2.02 |
| 102 | Hong Kong | 16.30 | Slovenia | 104.89 | | Norway | 1.14 | Indonesia | 24.93 | Greenland | -284 | | Turkmenistan | 2.02 |
| 103 | Chile | 16.60 | Armenia | 104.29 | | Libya | 1.13 | Mexico | 24.92 | Virgin Is. (US) | -420 | | Dominica | 2.01 |
| 104 | Mozambique | 16.70 | Iraq | 101.52 | | Colombia | 1.12 | Myanmar | 24.52 | Kiribati | -471 | | Myanmar | 1.97 |
| 105 | Djibouti | 16.80 | Albania | 101.38 | | Lesotho | 1.10 | Tunisia | 24.43 | Guam | -504 | | S. Maarten (D) | 1.97 |
| 106 | South Korea | 17.00 | N. Mariana Is. | 100.17 | | Peru | 1.10 | Peru | 24.36 | S. Tome & Prin | -604 | | Virgin Is. (US) | 1.97 |
| 107 | Venezuela | 17.00 | Costa Rica | 99.53 | | Timor Leste | 1.09 | Saudi Arabia | 24.10 | Papua N. G. | -707 | | Curacao | 1.96 |
| 108 | Peru | 17.10 | Cambodia | 97.45 | | C. African Rep. | 1.06 | Vietnam | 23.61 | St Vin. & Gren, | -737 | | Indonesia | 1.96 |
| 109 | Eswatini | 17.20 | Cote d'Ivoire | 95.58 | | Morocco | 1.02 | Iran | 22.84 | N. Mariana Is. | -1097 | | Georgia | 1.95 |
| 110 | Israel | 17.20 | Spain | 95.57 | | Cyprus | 1.02 | N. Mariana Is. | 22.59 | Micronesia | -1104 | | Colombia | 1.94 |
| 111 | El Salvador | 17.30 | Kenya | 95.32 | | Netherlands | 0.99 | Sri Lanka | 22.36 | Am. Samoa | -1110 | | Iceland | 1.94 |
| 112 | Guyana | 17.50 | Honduras | 93.52 | | Austria | 0.99 | Azerbaijan | 22.34 | Suriname | -1166 | | Ant. & Barbuda | 1.93 |
| 113 | Mexico | 17.40 | Timor Leste | 92.08 | | Faroe Islands | 0.98 | Malaysia | 22.29 | Cape Verde | -1209 | | Tunisia | 1.93 |
| 114 | Macau | 17.70 | Senegal | 91.68 | | New Caledonia | 0.95 | Argentina | 22.19 | Fr. Polynesia | -1261 | | Iran | 1.91 |
| 115 | Sri Lanka | 17.90 | Dominica | 89.10 | | Eswatini | 0.95 | Turkey | 21.84 | Uruguay | -1348 | | France | 1.90 |
| 116 | Montenegro | 18.00 | Moldova | 88.02 | | Suriname | 0.91 | St Vin. & Gren, | 21.65 | St Martin (Fr) | -1424 | | Grenada | 1.90 |
| 117 | Guinea | 18.10 | Brunei | 86.41 | | Belgium | 0.91 | New Caledonia | 21.53 | Malawi | -1507 | | Qatar | 1.90 |
| 118 | Azerbaijan | 18.30 | Morocco | 83.64 | | Liechtenstein | 0.90 | Bhutan | 21.46 | Montenegro | -1686 | | Turkey | 1.90 |
| 119 | Malaysia | 18.30 | Romania | 82.79 | | Dominican Rep. | 0.89 | Kosovo | 21.29 | Guinea-Bissau | -1712 | | Gibraltar | 1.89 |
| 120 | Guatemala | 18.80 | Myanmar | 82.36 | | India | 0.88 | St Martin (Fr) | 21.13 | Marshall Islands | -1765 | | Suriname | 1.89 |
| 121 | South Africa | 18.80 | Burkina Faso | 82.27 | | Ecuador | 0.87 | Georgia | 21.04 | Madagascar | -1795 | | Bermuda | 1.88 |
| 122 | Belarus | 19.00 | Greece | 80.97 | | Mexico | 0.87 | Brunei | 21.02 | Comoros | -2051 | | Greenland | 1.88 |
| 123 | Dominica | 19.00 | Fr. Polynesia | 80.78 | | Indonesia | 0.84 | Greenland | 20.80 | Tonga | -2149 | | Isle of Man | 1.88 |
| 124 | Cuba | 19.70 | Uzbekistan | 79.29 | | UK | 0.82 | Colombia | 20.60 | Mauritania | -2185 | | Paraguay | 1.88 |
| 125 | Thailand | 19.80 | Serbia | 79.25 | | Philippines | 0.81 | Faroe Islands | 20.16 | Latvia | -2225 | | Kosovo | 1.87 |
| 126 | Timor Leste | 19.00 | Tunisia | 78.01 | | Guam | 0.80 | Seychelles | 20.14 | Maldives | -2421 | | Mongolia | 1.87 |
| 127 | Comoros | 20.50 | Samoa | 77.43 | | Brunei | 0.78 | Maldives | 20.05 | North Korea | -2473 | | Saudi Arabia | 1.87 |
| 128 | Serbia | 20.20 | Lesotho | 75.30 | | Turks & Caicos | 0.76 | Moldova | 19.99 | Rep. of Congo | -2491 | | Nepal | 1.85 |
| 129 | Madagascar | 20.50 | Ireland | 74.98 | | Denmark | 0.74 | Brazil | 19.94 | Timor Leste | -2552 | | New Zealand | 1.85 |
| 130 | Kyrgyzstan | 21.10 | Guinea-Bissau | 74.88 | | Armenia | 0.73 | Grenada | 19.85 | Angola | -2629 | | United States | 1.84 |
| 131 | Palestinian Ter. | 21.10 | Tajikistan | 73.36 | | Myanmar | 0.70 | Fr. Polynesia | 19.73 | Samoa | -2754 | | New Caledonia | 1.83 |
| 132 | Cambodia | 21.90 | Tanzania | 73.05 | | Bhutan | 0.70 | Armenia | 19.55 | Mauritius | -2787 | | Nicaragua | 1.83 |
| 133 | Zambia | 22.00 | N. Macedonia | 72.63 | | Vietnam | 0.67 | Costa Rica | 19.33 | Gambia | -2989 | | Aruba | 1.82 |
| 134 | Ethiopia | 22.20 | Yemen | 72.40 | | Tunisia | 0.67 | Jamaica | 19.13 | Bolivia | -3000 | | Cayman Islands | 1.82 |
| 135 | Sierra Leone | 22.00 | Ecuador | 71.77 | | Samoa | 0.65 | Ireland | 19.02 | Belarus | -3119 | | North Korea | 1.81 |
| 136 | St Vin. & Gren, | 22.00 | Eswatini | 70.87 | | Nauru | 0.63 | Bahrain | 18.99 | Fiji | -3278 | | Seychelles | 1.81 |
| 137 | Libya | 22.30 | Ukraine | 70.85 | | Guyana | 0.57 | North Korea | 18.98 | Niger | -4041 | | Montenegro | 1.80 |
| 138 | Senegal | 22.30 | Croatia | 68.90 | | Chile | 0.54 | Uruguay | 18.69 | Bos. & Herz. | -4497 | | St Martin (Fr) | 1.80 |
| 139 | Belize | 23.00 | Mexico | 66.16 | | Fiji | 0.51 | Kuwait | 18.60 | Honduras | -4821 | | Fr. Polynesia | 1.79 |
| 140 | Botswana | 23.10 | Georgia | 64.95 | | Ant. & Barbuda | 0.51 | Palau | 18.54 | Lesotho | -5107 | | Mexico | 1.79 |
| 141 | N. Macedonia | 23.30 | Eq. Guinea | 64.30 | | Lebanon | 0.50 | New Zealand | 18.37 | Croatia | -5186 | | Denmark | 1.77 |
| 142 | Cote d'Ivoire | 24.60 | Bos. & Herz. | 62.59 | | Finland | 0.50 | St Kitts & Nevis | 18.33 | Guyana | -5407 | | Belgium | 1.76 |
| 143 | Armenia | 24.40 | Afghanistan | 62.22 | | Cape Verde | 0.50 | Montenegro | 18.33 | N. Macedonia | -5728 | | Bhutan | 1.76 |
| 144 | Zimbabwe | 24.80 | Bulgaria | 61.19 | | United States | 0.49 | Bahamas | 18.33 | Botswana | -5778 | | St Kitts & Nevis | 1.76 |
| 145 | Namibia | 25.00 | Panama | 59.33 | | Bahamas | 0.48 | Ant. & Barbuda | 18.22 | Eswatini | -6754 | | Chile | 1.75 |
| 146 | Saudi Arabia | 25.10 | Cameroon | 58.46 | | Sweden | 0.47 | Dominica | 18.11 | Uzbekistan | -7066 | | Uruguay | 1.75 |
| 147 | Myanmar | 25.20 | Guinea | 57.20 | | Costa Rica | 0.47 | Iceland | 18.06 | Kazakhstan | -7368 | | Brazil | 1.74 |
| 148 | Mongolia | 25.60 | Nicaragua | 55.93 | | El Salvador | 0.47 | Australia | 18.03 | Benin | -7725 | | Finland | 1.74 |
| 149 | Togo | 26.00 | Liberia | 55.79 | | Micronesia | 0.46 | Trin. & Tobago | 18.03 | Guatemala | -7725 | | St Vin. & Gren, | 1.74 |
| 150 | Turkmenistan | 26.50 | Iran | 55.18 | | Turkey | 0.41 | St Lucia | 17.87 | Estonia | -7742 | | Australia | 1.73 |
| 151 | Iran | 27.20 | Madagascar | 52.32 | | Slovenia | 0.40 | Gibraltar | 17.79 | Liberia | -7779 | | Brunei | 1.73 |
| 152 | Laos | 27.50 | South Africa | 51.42 | | Brazil | 0.40 | United States | 17.59 | Serbia | -8132 | | Czech | 1.73 |
| 153 | Cameroon | 27.60 | Fiji | 50.32 | | Maldives | 0.36 | Russia | 17.51 | Nicaragua | -8189 | | Malaysia | 1.73 |
| 154 | Vietnam | 28.70 | Djibouti | 49.06 | | Greenland | 0.36 | Barbados | 17.49 | Laos | -10284 | | Ireland | 1.72 |
| 155 | S. Tome & Prin | 29.00 | Turks & Caicos | 48.26 | | North Korea | 0.34 | UK | 17.41 | Senegal | -10307 | | Cuba | 1.71 |
| 156 | Tanzania | 29.00 | Colombia | 46.63 | | France | 0.33 | Chile | 17.38 | Yemen | -10482 | | Lebanon | 1.71 |
| 157 | Kuwait | 30.20 | Montenegro | 45.89 | | Venezuela | 0.31 | Sweden | 17.25 | Jamaica | -10506 | | St Lucia | 1.71 |
| 158 | China | 31.00 | Belarus | 45.46 | | San Marino | 0.31 | Aruba | 17.19 | Sierra Leone | -11000 | | Barbados | 1.70 |
| 159 | Qatar | 31.30 | Lithuania | 45.23 | | Argentina | 0.29 | N. Macedonia | 17.07 | Guinea | -12024 | | Maldives | 1.70 |
| 160 | Uzbekistan | 31.40 | Congo (DRC) | 45.17 | | Channel Islands | 0.28 | Albania | 17.04 | Palestinian Ter. | -12369 | | Palau | 1.70 |
| 161 | Bahrain | 31.80 | Zimbabwe | 41.54 | | St Lucia | 0.28 | France | 16.78 | Paraguay | -12451 | | Turks & Caicos | 1.70 |
| 162 | Somalia | 32.00 | Mozambique | 41.53 | | Fr. Polynesia | 0.26 | Belarus | 16.68 | Eritrea | -12696 | | Azerbaijan | 1.69 |
| 163 | Morocco | 33.00 | Bahamas | 39.71 | | Macau | 0.22 | China | 16.59 | Ghana | -13114 | | Liechtenstein | 1.69 |
| 164 | U.A.E. | 33.70 | Faroe Islands | 39.38 | | Grenada | 0.14 | Virgin Is. (US) | 16.52 | Cameroon | -13892 | | Sweden | 1.67 |
| 165 | Cape Verde | 35.00 | Palau | 38.61 | | Trin. & Tobago | 0.12 | Norway | 16.51 | Togo | -14014 | | Armenia | 1.65 |
| 166 | Gambia | 35.20 | United States | 36.43 | | Azerbaijan | 0.12 | U.A.E. | 16.34 | Tunisia | -15221 | | Bahrain | 1.65 |
| 167 | Indonesia | 35.50 | Kyrgyzstan | 36.37 | | Croatia | 0.10 | Cayman Islands | 16.29 | C. African Rep. | -15357 | | Luxembourg | 1.63 |
| 168 | Ghana | 35.80 | Laos | 32.75 | | St Kitts & Nevis | 0.10 | Belgium | 16.29 | Rwanda | -15582 | | Romania | 1.63 |
| 169 | Mali | 37.90 | Venezuela | 31.99 | | Georgia | 0.08 | Turks & Caicos | 16.22 | Lebanon | -17267 | | Trin. & Tobago | 1.63 |
| 170 | Benin | 39.00 | Estonia | 31.57 | | South Korea | 0.08 | Cyprus | 16.05 | Iraq | -17735 | | UK | 1.63 |
| 171 | Iraq | 38.40 | Latvia | 30.20 | | Monaco | 0.06 | Estonia | 15.97 | Hong Kong | -19272 | | Estonia | 1.62 |
| 172 | Tunisia | 38.00 | Angola | 28.58 | | Romania | 0.06 | Slovakia | 15.91 | Ecuador | -19704 | | Lithuania | 1.62 |
| 173 | Niger | 38.20 | Somalia | 28.38 | | Aruba | 0.05 | Romania | 15.88 | Kenya | -19781 | | Netherlands | 1.61 |
| 174 | Guinea-Bissau | 39.20 | Eritrea | 28.17 | | Isle of Man | 0.04 | Denmark | 15.87 | Slovakia | -21027 | | U.A.E. | 1.61 |
| 175 | Egypt | 39.80 | Solomon Islands | 27.91 | | Jamaica | 0.02 | Luxembourg | 15.82 | Tajikistan | -21236 | | Hungary | 1.60 |
| 176 | Nigeria | 40.10 | Zambia | 27.11 | | Barbados | 0.01 | Latvia | 15.69 | Kosovo | -22178 | | Slovakia | 1.60 |
| 177 | Burundi | 40.30 | Sudan | 26.44 | | Italy | -0.03 | Czech | 15.67 | Cuba | -22356 | | Slovenia | 1.60 |
| 178 | Bos. & Herz. | 40.60 | Chile | 26.30 | | Thailand | -0.05 | S. Maarten (D) | 15.56 | El Salvador | -23102 | | Switzerland | 1.59 |
| 179 | Rwanda | 40.80 | Peru | 26.15 | | Qatar | -0.05 | Cuba | 15.51 | Albania | -24472 | | Canada | 1.58 |
| 180 | Uganda | 41.00 | Sweden | 25.75 | | Nepal | -0.07 | Canada | 15.30 | Burkina Faso | -25807 | | Germany | 1.58 |
| 181 | Nepal | 42.80 | Vanuatu | 25.68 | | Bermuda | -0.08 | Curacao | 15.24 | Congo (DRC) | -26968 | | Norway | 1.57 |
| 182 | Burkina Faso | 43.00 | Brazil | 25.16 | | Uruguay | -0.08 | Netherlands | 15.17 | Burundi | -27074 | | Albania | 1.55 |
| 183 | Rep. of Congo | 43.50 | Papua N. G. | 22.53 | | Seychelles | -0.09 | Qatar | 15.16 | Moldova | -27088 | | China | 1.55 |
| 184 | Syria | 44.00 | Bhutan | 20.47 | | Slovakia | -0.09 | Br. Virgin Is. | 15.14 | Sri Lanka | -27245 | | Latvia | 1.55 |
| 185 | Oman | 44.40 | Niger | 19.98 | | Latvia | -0.10 | Mauritius | 15.12 | Romania | -28466 | | Monaco | 1.54 |
| 186 | South Sudan | 46.00 | New Zealand | 19.43 | | China | -0.10 | Poland | 15.10 | Tanzania | -29865 | | San Marino | 1.54 |
| 187 | Tajikistan | 46.30 | Uruguay | 19.37 | | Mauritius | -0.12 | Thailand | 15.09 | Armenia | -29966 | | Thailand | 1.54 |
| 188 | Afghanistan | 46.50 | Algeria | 19.09 | | Montenegro | -0.17 | Switzerland | 15.01 | Algeria | -31240 | | N. Macedonia | 1.53 |
| 189 | North Korea | 47.00 | Mali | 18.91 | | Palau | -0.18 | Finland | 14.94 | Haiti | -31747 | | Austria | 1.52 |
| 190 | Mauritania | 47.40 | Finland | 18.28 | | N. Macedonia | -0.21 | Slovenia | 14.93 | Cambodia | -32960 | | Russia | 1.52 |
| 191 | Eritrea | 48.10 | Rep. of Congo | 17.67 | | Russia | -0.29 | Lithuania | 14.89 | Dominican Rep. | -34806 | | Bulgaria | 1.51 |
| 192 | Yemen | 50.00 | Belize | 17.66 | | Greece | -0.30 | Bulgaria | 14.54 | Nigeria | -35202 | | Malta | 1.51 |
| 193 | India | 50.60 | South Sudan | 17.44 | | Cuba | -0.36 | Isle of Man | 14.52 | Myanmar | -37979 | | Cyprus | 1.49 |
| 194 | Eq. Guinea | 53.00 | Paraguay | 17.07 | | Poland | -0.37 | Hungary | 14.49 | Indonesia | -38469 | | Andorra | 1.47 |
| 195 | Sudan | 55.00 | Argentina | 16.59 | | Tonga | -0.42 | Channel Islands | 14.40 | Mozambique | -38940 | | Croatia | 1.46 |
| 196 | C. African Rep. | 56.80 | New Caledonia | 15.71 | | Puerto Rico | -0.45 | Serbia | 14.35 | Afghanistan | -44089 | | Serbia | 1.46 |
| 197 | Congo (DRC) | 58.20 | Turkmenistan | 15.39 | | Virgin Is. (US) | -0.47 | Liechtenstein | 14.35 | Morocco | -46802 | | Belarus | 1.45 |
| 198 | Pakistan | 73.70 | Oman | 15.28 | | Dominica | -0.47 | Austria | 14.30 | Mali | -46880 | | Portugal | 1.45 |
| 199 | Bangladesh | 78.00 | Norway | 14.98 | | Japan | -0.49 | Ukraine | 14.30 | Vietnam | -59645 | | Bahamas | 1.44 |
| 200 | Chad | 91.80 | Saudi Arabia | 14.97 | | Belarus | -0.54 | Croatia | 14.14 | Zimbabwe | -60528 | | Costa Rica | 1.43 |
| 201 | Am. Samoa | . | Chad | 14.66 | | Hungary | -0.54 | Macau | 14.09 | Czech | -86169 | | Greece | 1.41 |
| 202 | Aruba | . | Bolivia | 11.15 | | Bos. & Herz. | -0.62 | Germany | 13.92 | Mexico | -104581 | | Japan | 1.40 |
| 203 | Br. Virgin Is. | . | Gabon | 9.43 | | Germany | -0.62 | Bermuda | 13.88 | Venezuela | -105297 | | Bos. & Herz. | 1.38 |
| 204 | Channel Islands | . | Russia | 8.81 | | Serbia | -0.62 | Greece | 13.59 | Uganda | -117924 | | Br. Virgin Is. | 1.38 |
| 205 | Curacao | . | C. African Rep. | 8.18 | | Sri Lanka | -0.65 | Spain | 13.26 | Greece | -122772 | | Mauritius | 1.36 |
| 206 | Faroe Islands | . | Kazakhstan | 7.42 | | Kosovo | -0.67 | Bos. & Herz. | 13.22 | Jordan | -156369 | | Poland | 1.32 |
| 207 | Gibraltar | . | Mauritania | 4.73 | | St Vin. & Gren, | -0.71 | Monaco | 13.18 | Philippines | -160373 | | Spain | 1.30 |
| 208 | Greenland | . | Canada | 4.43 | | Albania | -1.15 | Malta | 13.15 | Russia | -178042 | | Italy | 1.26 |
| 209 | Guam | . | Botswana | 4.31 | | Curacao | -1.43 | Portugal | 12.89 | Brazil | -225510 | | Moldova | 1.26 |
| 210 | Isle of Man | . | Guyana | 4.17 | | Am. Samoa | -1.71 | San Marino | 12.70 | Poland | -238062 | | Puerto Rico | 1.26 |
| 211 | N. Mariana Is. | . | Libya | 4.11 | | Tuvalu | -1.78 | Andorra | 12.25 | Turkey | -275952 | | Hong Kong | 1.24 |
| 212 | Nauru | . | Suriname | 3.88 | | N. Mariana Is. | -2.05 | Italy | 12.14 | China | -318992 | | Macau | 1.24 |
| 213 | New Caledonia | . | Iceland | 3.79 | | Moldova | -2.84 | Puerto Rico | 12.00 | Nepal | -401282 | | Ukraine | 1.22 |
| 214 | S. Maarten (D) | . | Namibia | 3.51 | | Bulgaria | -3.01 | Singapore | 11.79 | Bangladesh | -473362 | | Singapore | 1.17 |
| 215 | St Kitts & Nevis | . | Australia | 3.38 | | Marshall Islands | -3.17 | Japan | 11.65 | Sudan | -544257 | | South Korea | 1.12 |
| 216 | St Martin (Fr) | . | Mongolia | 2.20 | | St Martin (Fr) | -4.81 | South Korea | 10.97 | India | -630830 | | Channel Islands | . |
| 217 | Turks & Caicos | . | Greenland | 0.14 | | Ukraine | -8.42 | Hong Kong | 10.70 | Pakistan | -1401173 | | Palestinian Ter. | . |

## Supplementary Table 6 (cont.). Objective Indicators – Global Countries Ranked

| Rank | Health | | | | | | | | Economics | | | | |
| --- | --- | --- | --- | --- | --- | --- | --- | --- | --- | --- | --- | --- | --- |
| **Life Expectancy at Birth**  Total (years)  *higher score = better*  *higher rank = better* | | **Birth Rate**  Per 1,000 people  *higher score = better*  *higher rank = better* | | **Maternal Mortality Ratio** Estimate, per 100,000 live births  *higher score = worse*  *higher rank = better* | | **Healthcare Spending**  Per capita  *higher score = better*  *higher rank = better* | | **GDP per Capita**  Current US$  *higher score = better*  *higher rank = better* | | **GDP growth**  Annual %  *higher score = better*  *higher rank = better* | | |
| 1 | Monaco | 86.37 | C. African Rep. | 46.36 | Belarus | 1 | United States | 12434.43 | Monaco | 256580.52 | | Macau | 75.06 |
| 2 | San Marino | 85.71 | Somalia | 42.96 | Norway | 1 | Bermuda | 11188.00 | Liechtenstein | 186400.23 | | Guyana | 33.80 |
| 3 | Hong Kong | 85.25 | Chad | 42.40 | Hong Kong | 2 | Switzerland | 10963.43 | Luxembourg | 128678.19 | | N. Mariana Is. | 16.64 |
| 4 | Liechtenstein | 84.84 | Niger | 41.89 | Australia | 2 | Liechtenstein | 9884.00 | Bermuda | 125841.60 | | Libya | 10.16 |
| 5 | Fr. Polynesia | 84.07 | Congo (DRC) | 41.31 | Israel | 2 | Norway | 8692.58 | Ireland | 103887.80 | | Samoa | 8.58 |
| 6 | Switzerland | 84.06 | Mali | 40.03 | Czech | 3 | Monaco | 7655.94 | Switzerland | 99564.71 | | Congo (DRC) | 8.56 |
| 7 | Japan | 84.04 | Angola | 37.59 | Croatia | 3 | Luxembourg | 7504.58 | Cayman Islands | 97749.51 | | Armenia | 8.30 |
| 8 | Andorra | 84.04 | Mozambique | 37.49 | Poland | 2 | Iceland | 7196.91 | Isle of Man | 94299.97 | | Tajikistan | 8.30 |
| 9 | Spain | 83.88 | Afghanistan | 35.44 | Iceland | 3 | Australia | 6731.00 | Norway | 87925.09 | | Rwanda | 8.24 |
| 10 | Italy | 83.70 | Tanzania | 35.22 | Japan | 3 | Ireland | 6448.02 | Singapore | 84734.26 | | India | 8.15 |
| 11 | Gibraltar | 83.55 | Yemen | 35.21 | N. Macedonia | 3 | Denmark | 6432.37 | United States | 82769.41 | | San Marino | 7.90 |
| 12 | Malta | 83.51 | Uganda | 35.20 | Slovenia | 3 | Germany | 6232.59 | Qatar | 80195.87 | | Georgia | 7.83 |
| 13 | South Korea | 83.43 | Mauritania | 34.42 | U.A.E. | 3 | Austria | 6208.64 | Iceland | 79636.95 | | Fiji | 7.52 |
| 14 | Luxembourg | 83.36 | Benin | 33.88 | Spain | 3 | Sweden | 6152.33 | Channel Islands | 74589.14 | | Malta | 7.50 |
| 15 | Sweden | 83.31 | Guinea | 33.85 | Belgium | 4 | Canada | 6112.02 | Faroe Islands | 71717.70 | | Mongolia | 7.42 |
| 16 | Israel | 83.20 | Cameroon | 33.74 | Denmark | 4 | Netherlands | 5796.03 | Denmark | 68453.88 | | Panama | 7.40 |
| 17 | Kuwait | 83.19 | Burundi | 33.67 | Germany | 4 | Belgium | 5404.62 | Macau | 67476.53 | | Palestinian Ter. | 7.05 |
| 18 | Macau | 83.18 | Sudan | 33.61 | Ireland | 4 | UK | 5366.78 | Australia | 64820.91 | | Mauritius | 6.96 |
| 19 | Faroe Islands | 83.14 | Zambia | 33.08 | Netherlands | 4 | Finland | 4902.04 | Netherlands | 64572.01 | | Guinea | 6.74 |
| 20 | Norway | 83.11 | Nigeria | 32.95 | South Korea | 4 | France | 4865.18 | Greenland | 57116.30 | | Djibouti | 6.68 |
| 21 | Australia | 83.05 | Madagascar | 32.10 | Slovakia | 4 | New Zealand | 4804.38 | Austria | 56033.57 | | Mauritania | 6.51 |
| 22 | New Zealand | 83.00 | Cote d'Ivoire | 31.99 | Qatar | 4 | Singapore | 4320.52 | Sweden | 55516.84 | | Ethiopia | 6.50 |
| 23 | France | 82.93 | Ethiopia | 31.90 | Sweden | 4 | Israel | 4223.87 | Belgium | 54700.91 | | Togo | 6.41 |
| 24 | U.A.E. | 82.91 | Burkina Faso | 31.64 | Estonia | 5 | Japan | 3889.36 | Germany | 54343.23 | | Benin | 6.35 |
| 25 | Singapore | 82.90 | Malawi | 31.38 | Greece | 5 | San Marino | 3874.99 | San Marino | 54264.57 | | Montenegro | 6.34 |
| 26 | Ireland | 82.86 | Togo | 31.14 | Monaco | 5 | Andorra | 3654.07 | Canada | 53431.19 | | Turkmenistan | 6.30 |
| 27 | Iceland | 82.61 | Liberia | 30.96 | Switzerland | 5 | Malta | 3352.77 | Finland | 52925.69 | | Uzbekistan | 6.29 |
| 28 | Belgium | 82.40 | Rep. of Congo | 30.63 | Turkmenistan | 5 | South Korea | 3269.70 | Israel | 52642.43 | | Cote d'Ivoire | 6.20 |
| 29 | Qatar | 82.37 | Sierra Leone | 30.60 | Austria | 6 | Italy | 3228.44 | Hong Kong | 50531.74 | | Kyrgyzstan | 6.15 |
| 30 | Bermuda | 82.31 | Gambia | 30.43 | Bos. & Herz. | 6 | Slovenia | 3033.32 | UK | 49463.86 | | St Vin. & Gren, | 6.02 |
| 31 | Portugal | 82.28 | Zimbabwe | 30.41 | Bulgaria | 6 | Spain | 2910.84 | Br. Virgin Is. | 49357.00 | | Gibraltar | 6.00 |
| 32 | Slovenia | 81.98 | Guinea-Bissau | 30.04 | Italy | 6 | Cyprus | 2864.16 | U.A.E. | 49040.69 | | Bangladesh | 5.78 |
| 33 | Netherlands | 81.91 | Eq. Guinea | 29.60 | Montenegro | 6 | Portugal | 2743.58 | New Zealand | 48280.81 | | Sierra Leone | 5.71 |
| 34 | Denmark | 81.85 | Senegal | 29.42 | Singapore | 6 | Czech | 2609.24 | Andorra | 46812.45 | | Kenya | 5.56 |
| 35 | Puerto Rico | 81.69 | Palestinian Ter. | 28.80 | Albania | 7 | Bahamas | 2341.32 | France | 44690.93 | | Philippines | 5.55 |
| 36 | Finland | 81.69 | Comoros | 28.65 | France | 7 | U.A.E. | 2314.75 | Virgin Is. (US) | 44320.91 | | Cape Verde | 5.48 |
| 37 | Cyprus | 81.65 | South Sudan | 28.59 | New Zealand | 7 | Nauru | 2264.20 | Gibraltar | 43000.00 | | Mozambique | 5.44 |
| 38 | Canada | 81.65 | Eritrea | 28.54 | Saudi Arabia | 7 | Estonia | 1998.89 | Guam | 41833.15 | | Zambia | 5.37 |
| 39 | Austria | 81.54 | Rwanda | 28.35 | Finland | 8 | Lithuania | 1988.95 | Malta | 40395.77 | | Uganda | 5.34 |
| 40 | Greece | 81.54 | S. Tome & Prin | 28.19 | Kuwait | 8 | Palau | 1978.85 | Italy | 39003.32 | | Zimbabwe | 5.34 |
| 41 | Bahrain | 81.28 | Vanuatu | 28.05 | Lithuania | 8 | Uruguay | 1850.81 | S. Maarten (D) | 38077.54 | | Ukraine | 5.32 |
| 42 | UK | 81.24 | Pakistan | 27.81 | Malta | 8 | Qatar | 1781.56 | Puerto Rico | 36779.06 | | China | 5.25 |
| 43 | Chile | 81.17 | Gabon | 27.67 | San Marino | 8 | Greece | 1768.11 | Cyprus | 36551.42 | | Bhutan | 5.21 |
| 44 | Channel Islands | 81.10 | Kenya | 27.11 | UK | 8 | Chile | 1714.89 | Bahamas | 35896.51 | | Guinea-Bissau | 5.20 |
| 45 | Maldives | 81.04 | Solomon Islands | 26.94 | Russia | 9 | Kuwait | 1700.32 | Aruba | 33984.79 | | Costa Rica | 5.11 |
| 46 | Isle of Man | 81.00 | Uzbekistan | 26.47 | Andorra | 11 | Latvia | 1642.47 | Japan | 33766.53 | | Turkey | 5.11 |
| 47 | Costa Rica | 80.80 | Ghana | 26.31 | Chile | 10 | Slovakia | 1642.39 | Kuwait | 33729.80 | | Kazakhstan | 5.10 |
| 48 | Germany | 80.54 | Tajikistan | 26.12 | Kazakhstan | 10 | Saudi Arabia | 1593.37 | New Caledonia | 33516.36 | | Guam | 5.10 |
| 49 | Virgin Is. (US) | 80.52 | Namibia | 25.89 | Luxembourg | 11 | Poland | 1543.71 | Spain | 33509.01 | | Tanzania | 5.07 |
| 50 | Cayman Islands | 80.36 | Kiribati | 25.81 | Canada | 12 | Panama | 1472.05 | South Korea | 33121.37 | | Indonesia | 5.05 |
| 51 | St Martin (Fr) | 80.22 | Iraq | 25.73 | Serbia | 11 | Hungary | 1407.49 | Brunei | 32962.91 | | Vietnam | 5.05 |
| 52 | Oman | 80.03 | Nauru | 25.51 | Puerto Rico | 11 | Argentina | 1370.88 | Slovenia | 32610.11 | | Iran | 5.04 |
| 53 | Czech | 79.88 | Samoa | 25.40 | Guam | 12 | Croatia | 1344.19 | Saudi Arabia | 32093.96 | | Monaco | 5.04 |
| 54 | Albania | 79.60 | Botswana | 24.71 | Hungary | 12 | Barbados | 1302.06 | Czech | 31591.18 | | Iceland | 5.04 |
| 55 | Panama | 79.59 | Papua N. G. | 24.58 | Romania | 12 | Trin. & Tobago | 1292.02 | Turks & Caicos | 30348.81 | | Eswatini | 5.01 |
| 56 | N. Mariana Is. | 78.81 | Lesotho | 24.11 | Oman | 13 | Cuba | 1199.35 | Estonia | 30133.30 | | Cambodia | 4.96 |
| 57 | New Caledonia | 78.77 | Eswatini | 24.07 | Cyprus | 14 | St Kitts & Nevis | 1160.26 | Bahrain | 29218.86 | | St Martin (Fr) | 4.90 |
| 58 | Saudi Arabia | 78.73 | Tonga | 23.12 | Tajikistan | 14 | Maldives | 1150.69 | Lithuania | 27786.01 | | Gambia | 4.80 |
| 59 | Poland | 78.51 | Tuvalu | 23.08 | Lebanon | 15 | Bahrain | 1110.68 | Portugal | 27331.21 | | Maldives | 4.73 |
| 60 | Estonia | 78.49 | Micronesia | 22.30 | Portugal | 15 | Montenegro | 1107.06 | Slovakia | 24491.38 | | Paraguay | 4.71 |
| 61 | Croatia | 78.47 | Haiti | 22.20 | Turkey | 15 | Ant. & Barbuda | 1084.88 | Barbados | 23804.02 | | Dominica | 4.71 |
| 62 | United States | 78.39 | Syria | 22.11 | Ukraine | 15 | Tuvalu | 1084.67 | N. Mariana Is. | 23785.75 | | Liberia | 4.68 |
| 63 | Uruguay | 78.14 | Timor Leste | 22.08 | Uruguay | 15 | Russia | 1078.23 | Greece | 23400.73 | | Mali | 4.66 |
| 64 | Cuba | 78.09 | Honduras | 21.96 | China | 16 | Bulgaria | 1011.09 | Uruguay | 22797.81 | | Senegal | 4.58 |
| 65 | Kosovo | 78.03 | Turkmenistan | 21.74 | Bahrain | 17 | Costa Rica | 978.84 | St Kitts & Nevis | 22573.67 | | Nicaragua | 4.57 |
| 66 | Slovakia | 78.02 | Laos | 21.27 | Iran | 16 | Serbia | 903.12 | Latvia | 22502.84 | | Fr. Polynesia | 4.47 |
| 67 | Turks & Caicos | 78.01 | Bolivia | 21.25 | Egypt | 17 | Romania | 902.27 | Curacao | 22192.45 | | Cayman Islands | 4.36 |
| 68 | China | 77.95 | Marshall Islands | 21.14 | Azerbaijan | 18 | Brazil | 848.57 | Hungary | 22141.87 | | Aruba | 4.26 |
| 69 | Bos. & Herz. | 77.85 | Egypt | 21.00 | United States | 17 | Marshall Islands | 758.45 | Poland | 22056.67 | | Somalia | 4.22 |
| 70 | Lebanon | 77.82 | Guatemala | 20.81 | Armenia | 19 | Oman | 706.92 | Croatia | 21865.46 | | Curacao | 4.20 |
| 71 | Jordan | 77.81 | Djibouti | 20.77 | Latvia | 19 | Seychelles | 694.75 | Ant. & Barbuda | 21787.10 | | Namibia | 4.16 |
| 72 | Peru | 77.74 | Cambodia | 20.75 | Sri Lanka | 18 | Armenia | 674.79 | St Martin (Fr) | 21668.38 | | Kiribati | 4.12 |
| 73 | Colombia | 77.73 | Jordan | 20.61 | Moldova | 19 | China | 672.45 | Oman | 21549.84 | | Chad | 4.12 |
| 74 | Iran | 77.65 | Kyrgyzstan | 20.60 | Georgia | 20 | Bos. & Herz. | 667.30 | Guyana | 20765.35 | | Algeria | 4.10 |
| 75 | Ant. & Barbuda | 77.60 | Bangladesh | 20.35 | Syria | 20 | Brunei | 665.87 | Trin. & Tobago | 20016.15 | | Barbados | 4.09 |
| 76 | Montenegro | 77.59 | Guyana | 20.29 | Costa Rica | 24 | Mexico | 650.97 | Fr. Polynesia | 19914.60 | | Kosovo | 4.07 |
| 77 | Sri Lanka | 77.48 | Kazakhstan | 20.14 | Malaysia | 26 | St Lucia | 644.80 | Panama | 18686.41 | | Albania | 3.94 |
| 78 | Armenia | 77.47 | Paraguay | 19.99 | Uzbekistan | 26 | Mauritius | 590.94 | Romania | 18404.27 | | Belarus | 3.89 |
| 79 | Argentina | 77.40 | Algeria | 19.63 | Palestinian Ter. | 27 | Turkmenistan | 579.15 | Am. Samoa | 18017.46 | | Ant. & Barbuda | 3.86 |
| 80 | Ecuador | 77.39 | Nicaragua | 19.38 | Fiji | 30 | Dominica | 574.42 | Seychelles | 17879.24 | | Tuvalu | 3.85 |
| 81 | Br. Virgin Is. | 77.28 | Nepal | 19.34 | Maldives | 32 | South Africa | 569.84 | Chile | 17067.81 | | Serbia | 3.85 |
| 82 | Guam | 77.21 | Mongolia | 19.00 | Jordan | 31 | N. Macedonia | 561.69 | Costa Rica | 16942.03 | | Isle of Man | 3.84 |
| 83 | Turkey | 77.16 | South Africa | 18.78 | Argentina | 33 | Colombia | 534.44 | Palau | 15899.42 | | Madagascar | 3.80 |
| 84 | Lithuania | 76.99 | Israel | 18.60 | Thailand | 34 | Guyana | 531.63 | Bulgaria | 15885.54 | | S. Maarten (D) | 3.80 |
| 85 | Curacao | 76.80 | Belize | 18.03 | Ant. & Barbuda | 35 | Belarus | 529.02 | Argentina | 14187.48 | | Egypt | 3.76 |
| 86 | Hungary | 76.77 | Fiji | 18.00 | Barbados | 35 | Grenada | 521.24 | Russia | 13817.05 | | Laos | 3.75 |
| 87 | Malaysia | 76.66 | Dominican Rep. | 17.93 | Cuba | 35 | El Salvador | 501.24 | Mexico | 13790.02 | | Channel Islands | 3.72 |
| 88 | Romania | 76.61 | Guam | 17.66 | Brunei | 36 | Ecuador | 492.84 | St Lucia | 13554.67 | | Venezuela | 3.69 |
| 89 | Tunisia | 76.51 | Suriname | 17.30 | Tunisia | 36 | Paraguay | 480.19 | Turkey | 13105.66 | | U.A.E. | 3.62 |
| 90 | Thailand | 76.41 | St Martin (Fr) | 17.07 | Dominica | 36 | Botswana | 477.83 | Nauru | 12982.76 | | Russia | 3.60 |
| 91 | S. Maarten (D) | 76.37 | Libya | 17.02 | Panama | 37 | Georgia | 477.71 | Kazakhstan | 12918.87 | | Honduras | 3.58 |
| 92 | Aruba | 76.35 | Oman | 16.85 | Cape Verde | 40 | Jamaica | 468.35 | China | 12614.06 | | Grenada | 3.57 |
| 93 | Algeria | 76.26 | Morocco | 16.70 | El Salvador | 39 | Dominican Rep. | 462.26 | Maldives | 12530.36 | | Malaysia | 3.56 |
| 94 | Serbia | 76.22 | Myanmar | 16.70 | Mongolia | 41 | Malaysia | 458.22 | Serbia | 12281.51 | | Guatemala | 3.53 |
| 95 | Barbados | 76.18 | Saudi Arabia | 16.42 | Kyrgyzstan | 42 | Mongolia | 448.24 | Montenegro | 12221.48 | | El Salvador | 3.51 |
| 96 | Cape Verde | 76.06 | India | 16.15 | Mexico | 42 | Peru | 445.86 | Mauritius | 11613.04 | | New Caledonia | 3.50 |
| 97 | Brazil | 75.85 | Lebanon | 16.14 | Seychelles | 42 | St Vin. & Gren, | 434.87 | Malaysia | 11379.09 | | Australia | 3.44 |
| 98 | Bulgaria | 75.71 | Panama | 16.03 | St Lucia | 44 | Kazakhstan | 420.98 | Grenada | 11246.35 | | Morocco | 3.40 |
| 99 | Latvia | 75.68 | Philippines | 16.02 | Bhutan | 47 | Albania | 414.35 | Dominican Rep. | 10717.63 | | Croatia | 3.30 |
| 100 | Brunei | 75.33 | Peru | 15.94 | Honduras | 47 | Namibia | 405.59 | St Vin. & Gren, | 10520.44 | | Hong Kong | 3.28 |
| 101 | N. Macedonia | 75.32 | Indonesia | 15.94 | Grenada | 48 | Moldova | 398.15 | Brazil | 10294.87 | | Cameroon | 3.25 |
| 102 | Morocco | 75.31 | El Salvador | 15.76 | Vietnam | 48 | Micronesia | 396.76 | Dominica | 9833.00 | | Liechtenstein | 3.22 |
| 103 | Grenada | 75.21 | Mexico | 15.71 | Peru | 51 | Guatemala | 396.08 | Cuba | 9605.26 | | Br. Virgin Is. | 3.20 |
| 104 | Mexico | 75.07 | Am. Samoa | 15.39 | Trin. & Tobago | 54 | Lebanon | 392.38 | Bos. & Herz. | 8638.67 | | Mexico | 3.20 |
| 105 | Seychelles | 74.96 | Venezuela | 15.09 | Ecuador | 55 | Turkey | 385.88 | N. Macedonia | 8624.29 | | Seychelles | 3.16 |
| 106 | Nicaragua | 74.95 | Ecuador | 15.03 | St Vin. & Gren, | 56 | Tonga | 378.31 | Albania | 8575.17 | | Bolivia | 3.08 |
| 107 | Bangladesh | 74.67 | New Caledonia | 14.26 | Paraguay | 58 | Thailand | 369.98 | Georgia | 8283.67 | | Solomon Islands | 3.08 |
| 108 | Vietnam | 74.59 | Vietnam | 13.83 | Colombia | 59 | Ukraine | 369.90 | Turkmenistan | 8232.65 | | Papua N. G. | 3.04 |
| 109 | Bahamas | 74.55 | Tunisia | 13.75 | Libya | 59 | Suriname | 343.85 | Armenia | 8053.01 | | Comoros | 3.00 |
| 110 | Georgia | 74.50 | Brunei | 13.59 | Nicaragua | 60 | Bolivia | 307.14 | Peru | 7906.59 | | Bahrain | 2.98 |
| 111 | Azerbaijan | 74.43 | Colombia | 13.48 | Algeria | 62 | Azerbaijan | 304.20 | Belarus | 7829.05 | | Burkina Faso | 2.96 |
| 112 | Palestinian Ter. | 74.40 | Seychelles | 13.00 | Iraq | 66 | Belize | 297.42 | Botswana | 7820.23 | | Ghana | 2.94 |
| 113 | Kazakhstan | 74.40 | Iran | 12.95 | Fr. Polynesia | 64 | Jordan | 295.14 | Gabon | 7802.84 | | Brazil | 2.91 |
| 114 | Belarus | 74.18 | North Korea | 12.95 | Mauritius | 66 | Cape Verde | 285.97 | Belize | 7460.00 | | United States | 2.89 |
| 115 | Paraguay | 73.84 | N. Mariana Is. | 12.92 | Belize | 67 | Eswatini | 283.88 | Thailand | 7182.03 | | Nigeria | 2.86 |
| 116 | Dominican Rep. | 73.72 | Bhutan | 12.66 | Brazil | 67 | Libya | 278.38 | Azerbaijan | 7125.91 | | Botswana | 2.73 |
| 117 | North Korea | 73.64 | Greenland | 12.60 | North Korea | 67 | Tunisia | 265.85 | Colombia | 6947.36 | | Afghanistan | 2.71 |
| 118 | Suriname | 73.63 | Bahrain | 12.46 | Tonga | 67 | Iraq | 254.62 | Jamaica | 6839.73 | | Burundi | 2.70 |
| 119 | Belize | 73.57 | Malaysia | 12.41 | Morocco | 70 | Honduras | 251.04 | Moldova | 6729.41 | | Jordan | 2.68 |
| 120 | Trin. & Tobago | 73.49 | Cape Verde | 12.33 | St Kitts & Nevis | 74 | Gabon | 247.10 | Marshall Islands | 6678.34 | | Spain | 2.68 |
| 121 | Ukraine | 73.42 | Brazil | 12.32 | Guyana | 75 | Iran | 237.83 | Eq. Guinea | 6677.79 | | Bahamas | 2.64 |
| 122 | Mauritius | 73.41 | Armenia | 12.30 | S. Tome & Prin | 75 | Samoa | 236.23 | Ecuador | 6609.80 | | Cyprus | 2.61 |
| 123 | Russia | 73.25 | St Vin. & Gren, | 12.16 | Bahamas | 76 | Kiribati | 217.68 | Tuvalu | 6344.78 | | Andorra | 2.58 |
| 124 | Bhutan | 72.98 | Gibraltar | 12.07 | Kiribati | 80 | Fiji | 212.89 | Paraguay | 6276.35 | | Suriname | 2.54 |
| 125 | Tonga | 72.90 | Kosovo | 12.07 | Philippines | 84 | Venezuela | 208.57 | Libya | 6172.81 | | Portugal | 2.53 |
| 126 | Honduras | 72.88 | Ant. & Barbuda | 11.85 | India | 80 | Nicaragua | 208.48 | South Africa | 6022.54 | | Niger | 2.50 |
| 127 | Am. Samoa | 72.85 | Cayman Islands | 11.84 | Zambia | 85 | Morocco | 199.21 | Kosovo | 5960.16 | | Denmark | 2.50 |
| 128 | St Lucia | 72.70 | St Kitts & Nevis | 11.75 | Suriname | 84 | Philippines | 194.06 | Fiji | 5888.74 | | Faroe Islands | 2.49 |
| 129 | Guatemala | 72.60 | Grenada | 11.71 | Palau | 89 | Eq. Guinea | 190.09 | Mongolia | 5838.63 | | Gabon | 2.45 |
| 130 | Venezuela | 72.51 | Jamaica | 11.62 | Guatemala | 94 | Vietnam | 188.90 | Guatemala | 5762.82 | | Israel | 2.42 |
| 131 | Uzbekistan | 72.39 | Georgia | 11.49 | Mozambique | 99 | S. Tome & Prin | 180.33 | Iraq | 5565.13 | | Romania | 2.40 |
| 132 | Iraq | 72.32 | Virgin Is. (US) | 11.40 | Vanuatu | 100 | Algeria | 179.70 | Suriname | 5494.07 | | Dominican Rep. | 2.36 |
| 133 | Kyrgyzstan | 72.25 | St Lucia | 11.26 | Bangladesh | 115 | Timor Leste | 174.91 | El Salvador | 5391.07 | | Ecuador | 2.36 |
| 134 | St Kitts & Nevis | 72.15 | Montenegro | 11.20 | Eswatini | 118 | Egypt | 170.98 | Algeria | 5364.03 | | Greece | 2.33 |
| 135 | Mongolia | 72.12 | Sri Lanka | 11.20 | Samoa | 101 | Uzbekistan | 169.43 | Ukraine | 5069.70 | | St Kitts & Nevis | 2.28 |
| 136 | Syria | 72.12 | Turkey | 11.20 | Laos | 112 | Bhutan | 154.49 | Tonga | 4933.07 | | Vanuatu | 2.21 |
| 137 | El Salvador | 72.10 | Barbados | 11.17 | South Africa | 118 | Sri Lanka | 145.56 | Indonesia | 4876.31 | | Bos. & Herz. | 2.21 |
| 138 | India | 72.00 | Azerbaijan | 11.10 | Yemen | 118 | Vanuatu | 135.43 | Cape Verde | 4850.98 | | St Lucia | 2.21 |
| 139 | Tajikistan | 71.79 | Dominica | 11.09 | Solomon Islands | 123 | Lesotho | 133.70 | Venezuela | 4776.28 | | Jamaica | 2.20 |
| 140 | Samoa | 71.70 | Argentina | 11.06 | Dominican Rep. | 124 | Indonesia | 127.44 | Iran | 4465.64 | | Slovenia | 2.11 |
| 141 | Egypt | 71.63 | Maldives | 11.02 | Micronesia | 129 | Comoros | 122.94 | Jordan | 4455.51 | | N. Macedonia | 2.07 |
| 142 | Greenland | 71.55 | Iceland | 11.00 | Cambodia | 137 | Cambodia | 109.53 | Samoa | 4330.18 | | Nepal | 1.95 |
| 143 | Jamaica | 71.48 | Fr. Polynesia | 10.91 | Jamaica | 130 | Angola | 101.26 | Vietnam | 4282.09 | | Rep. of Congo | 1.91 |
| 144 | Vanuatu | 71.48 | Palau | 10.90 | Namibia | 139 | Liberia | 99.65 | Namibia | 4168.29 | | Malawi | 1.89 |
| 145 | St Vin. & Gren, | 71.23 | New Zealand | 10.86 | Indonesia | 140 | Solomon Islands | 96.74 | Micronesia | 4084.17 | | Thailand | 1.89 |
| 146 | Moldova | 71.20 | Bahamas | 10.85 | Nepal | 142 | Nigeria | 90.92 | Tunisia | 3977.70 | | Bulgaria | 1.89 |
| 147 | Indonesia | 71.15 | Australia | 10.80 | Bolivia | 146 | Kenya | 90.44 | Sri Lanka | 3827.96 | | Palau | 1.88 |
| 148 | Dominica | 71.13 | Cyprus | 10.80 | Kenya | 149 | Mauritania | 90.42 | Philippines | 3804.87 | | Lesotho | 1.83 |
| 149 | Cambodia | 70.67 | Moldova | 10.76 | Botswana | 155 | Nepal | 88.27 | Morocco | 3771.45 | | Am. Samoa | 1.74 |
| 150 | Solomon Islands | 70.53 | Turks & Caicos | 10.74 | Marshall Islands | 155 | Cote d'Ivoire | 86.15 | Bhutan | 3711.33 | | Latvia | 1.71 |
| 151 | Nepal | 70.35 | Trin. & Tobago | 10.71 | Pakistan | 155 | Kyrgyzstan | 85.88 | Bolivia | 3686.28 | | Japan | 1.68 |
| 152 | Guyana | 70.18 | United States | 10.70 | Djibouti | 162 | Ghana | 82.32 | Palestinian Ter. | 3663.97 | | Brunei | 1.41 |
| 153 | Turkmenistan | 70.07 | Faroe Islands | 10.60 | Tuvalu | 170 | Djibouti | 81.81 | Lebanon | 3654.36 | | Slovakia | 1.38 |
| 154 | Philippines | 69.83 | Kuwait | 10.30 | Uganda | 170 | Papua N. G. | 81.11 | Eswatini | 3610.61 | | South Korea | 1.36 |
| 155 | S. Tome & Prin | 69.72 | Ireland | 10.30 | Eq. Guinea | 174 | Afghanistan | 80.65 | Djibouti | 3554.84 | | Trin. & Tobago | 1.35 |
| 156 | Libya | 69.34 | Albania | 10.24 | Comoros | 179 | India | 79.52 | Vanuatu | 3515.24 | | Oman | 1.31 |
| 157 | Yemen | 69.30 | Mauritius | 10.20 | Angola | 183 | Tajikistan | 78.61 | Egypt | 3457.46 | | Greenland | 1.29 |
| 158 | Palau | 69.27 | Costa Rica | 10.18 | Myanmar | 185 | Rwanda | 76.84 | Honduras | 3231.66 | | Belgium | 1.25 |
| 159 | Botswana | 69.16 | UK | 10.02 | Papua N. G. | 189 | Zambia | 76.06 | Papua N. G. | 2957.68 | | Canada | 1.25 |
| 160 | Laos | 68.96 | Qatar | 9.91 | Timor Leste | 192 | Cameroon | 71.98 | S. Tome & Prin | 2940.93 | | Turks & Caicos | 1.20 |
| 161 | Senegal | 68.68 | France | 9.90 | Ethiopia | 195 | Zimbabwe | 70.66 | Uzbekistan | 2849.51 | | Qatar | 1.19 |
| 162 | Eritrea | 68.62 | Uruguay | 9.87 | Malawi | 225 | Guinea-Bissau | 66.05 | Nicaragua | 2612.87 | | Belize | 1.15 |
| 163 | Bolivia | 68.58 | U.A.E. | 9.77 | Venezuela | 227 | Senegal | 63.73 | Bangladesh | 2551.02 | | Azerbaijan | 1.12 |
| 164 | Mauritania | 68.48 | Denmark | 9.70 | Rwanda | 229 | Bangladesh | 61.09 | Cote d'Ivoire | 2530.85 | | Singapore | 1.08 |
| 165 | Gabon | 68.34 | Luxembourg | 9.50 | Gabon | 233 | Myanmar | 57.97 | India | 2480.79 | | Angola | 1.00 |
| 166 | Uganda | 68.25 | Sweden | 9.50 | Ghana | 234 | Burkina Faso | 56.76 | Rep. of Congo | 2477.98 | | Myanmar | 0.96 |
| 167 | Rwanda | 67.79 | Monaco | 9.44 | Senegal | 237 | Guinea | 55.04 | Cambodia | 2429.75 | | France | 0.94 |
| 168 | Timor Leste | 67.69 | Norway | 9.40 | Rep. of Congo | 241 | Togo | 54.01 | Angola | 2308.16 | | C. African Rep. | 0.87 |
| 169 | Pakistan | 67.65 | Belgium | 9.40 | Burkina Faso | 242 | Haiti | 52.30 | Ghana | 2260.29 | | Micronesia | 0.78 |
| 170 | Namibia | 67.39 | Netherlands | 9.20 | Tanzania | 276 | Rep. of Congo | 50.61 | Sudan | 2183.44 | | Moldova | 0.78 |
| 171 | Malawi | 67.35 | Serbia | 9.20 | Nauru | 273 | Mozambique | 49.47 | Zimbabwe | 2156.03 | | Yemen | 0.75 |
| 172 | Fiji | 67.32 | N. Macedonia | 9.20 | Sudan | 256 | South Sudan | 49.41 | Mauritania | 2120.82 | | New Zealand | 0.73 |
| 173 | Ethiopia | 67.32 | S. Maarten (D) | 9.13 | Cameroon | 258 | C. African Rep. | 47.92 | Kiribati | 2106.76 | | Syria | 0.73 |
| 174 | Micronesia | 67.20 | Liechtenstein | 9.10 | Eritrea | 291 | Uganda | 44.15 | Laos | 2066.95 | | Switzerland | 0.72 |
| 175 | Tuvalu | 67.11 | Hungary | 9.10 | Haiti | 328 | Laos | 41.35 | Solomon Islands | 2041.64 | | South Africa | 0.70 |
| 176 | Tanzania | 67.00 | Switzerland | 9.00 | Togo | 349 | Chad | 40.17 | Kyrgyzstan | 1970.16 | | Italy | 0.70 |
| 177 | Marshall Islands | 66.95 | Slovakia | 9.00 | Niger | 350 | Malawi | 39.66 | Kenya | 1952.30 | | Colombia | 0.61 |
| 178 | Myanmar | 66.89 | Chile | 8.96 | Gambia | 354 | Sierra Leone | 39.32 | Cameroon | 1736.86 | | Nauru | 0.59 |
| 179 | Comoros | 66.78 | Bulgaria | 8.90 | Sierra Leone | 354 | Pakistan | 38.77 | Senegal | 1706.44 | | Puerto Rico | 0.56 |
| 180 | Kiribati | 66.47 | Canada | 8.80 | Zimbabwe | 358 | Yemen | 38.12 | Haiti | 1705.78 | | Norway | 0.48 |
| 181 | Zambia | 66.35 | Cuba | 8.71 | Cote d'Ivoire | 359 | Tanzania | 35.65 | Nigeria | 1596.64 | | S. Tome & Prin | 0.37 |
| 182 | Sudan | 66.33 | Russia | 8.60 | Mali | 367 | Syria | 34.36 | Comoros | 1590.31 | | Uruguay | 0.37 |
| 183 | South Africa | 66.14 | Austria | 8.50 | Mauritania | 381 | Benin | 33.88 | Guinea | 1541.04 | | Lithuania | 0.34 |
| 184 | Papua N. G. | 66.13 | Czech | 8.40 | Burundi | 392 | Sudan | 31.58 | Timor Leste | 1502.52 | | UK | 0.34 |
| 185 | Afghanistan | 66.04 | Isle of Man | 8.34 | Congo (DRC) | 427 | Mali | 29.74 | Benin | 1394.37 | | Chile | 0.22 |
| 186 | Djibouti | 65.99 | Br. Virgin Is. | 8.33 | Madagascar | 445 | Gambia | 28.90 | Nepal | 1377.63 | | Poland | 0.14 |
| 187 | Gambia | 65.86 | Germany | 8.30 | Lesotho | 478 | Eritrea | 27.08 | Pakistan | 1365.28 | | Netherlands | 0.07 |
| 188 | Rep. of Congo | 65.77 | Croatia | 8.30 | Guinea | 494 | Ethiopia | 27.07 | Zambia | 1330.73 | | Tunisia | 0.04 |
| 189 | Ghana | 65.50 | Thailand | 8.25 | Guinea-Bissau | 505 | Niger | 26.51 | North Korea | 1300.00 | | Pakistan | -0.04 |
| 190 | Haiti | 64.94 | Channel Islands | 8.20 | Benin | 518 | Burundi | 24.69 | Ethiopia | 1272.02 | | Czech | -0.09 |
| 191 | Angola | 64.62 | Malta | 8.10 | Afghanistan | 521 | Congo (DRC) | 24.39 | Myanmar | 1233.20 | | Bermuda | -0.09 |
| 192 | Eswatini | 64.12 | Portugal | 8.10 | Somalia | 563 | Madagascar | 16.32 | Tanzania | 1224.49 | | Germany | -0.27 |
| 193 | Guinea-Bissau | 64.09 | Bermuda | 8.05 | Liberia | 628 | Somalia | 15.35 | Tajikistan | 1160.81 | | Sweden | -0.31 |
| 194 | Eq. Guinea | 63.71 | Slovenia | 8.00 | C. African Rep. | 692 | Channel Islands | . | South Sudan | 1080.15 | | Peru | -0.55 |
| 195 | Cameroon | 63.70 | Estonia | 8.00 | South Sudan | 692 | Curacao | . | Syria | 1051.67 | | Lebanon | -0.62 |
| 196 | Burundi | 63.65 | Romania | 8.00 | Chad | 748 | Faroe Islands | . | Rwanda | 1010.27 | | Saudi Arabia | -0.75 |
| 197 | Kenya | 63.65 | Aruba | 7.97 | Nigeria | 993 | Fr. Polynesia | . | Uganda | 1002.31 | | Hungary | -0.91 |
| 198 | Madagascar | 63.63 | Finland | 7.80 | Am. Samoa | . | Gibraltar | . | Togo | 985.70 | | Austria | -0.95 |
| 199 | Mozambique | 63.61 | Bos. & Herz. | 7.71 | Aruba | . | Greenland | . | Guinea-Bissau | 951.24 | | Luxembourg | -1.10 |
| 200 | Zimbabwe | 62.78 | Latvia | 7.70 | Bermuda | . | Guam | . | Lesotho | 916.28 | | Finland | -1.16 |
| 201 | Togo | 62.74 | Curacao | 7.50 | Br. Virgin Is. | . | Hong Kong | . | Gambia | 888.16 | | Virgin Is. (US) | -1.31 |
| 202 | Liberia | 62.16 | Singapore | 7.40 | Cayman Islands | . | Isle of Man | . | Burkina Faso | 882.69 | | Argentina | -1.61 |
| 203 | Nauru | 62.11 | Poland | 7.40 | Channel Islands | . | Kosovo | . | Mali | 869.27 | | Haiti | -1.86 |
| 204 | Cote d'Ivoire | 61.94 | Lithuania | 7.20 | Curacao | . | Macau | . | Liberia | 771.89 | | Cuba | -1.93 |
| 205 | Congo (DRC) | 61.90 | Belarus | 7.14 | Faroe Islands | . | N. Mariana Is. | . | Sierra Leone | 757.86 | | Sri Lanka | -2.30 |
| 206 | Sierra Leone | 61.79 | Andorra | 6.86 | Gibraltar | . | New Caledonia | . | Chad | 680.64 | | Tonga | -2.31 |
| 207 | Niger | 61.18 | Greece | 6.80 | Greenland | . | North Korea | . | Niger | 642.94 | | Iraq | -2.94 |
| 208 | Burkina Faso | 61.09 | Spain | 6.70 | Isle of Man | . | Palestinian Ter. | . | Congo (DRC) | 627.50 | | Estonia | -3.02 |
| 209 | Benin | 60.77 | Italy | 6.40 | Kosovo | . | Puerto Rico | . | Mozambique | 622.99 | | Eritrea | -3.14 |
| 210 | Guinea | 60.74 | China | 6.39 | Liechtenstein | . | S. Maarten (D) | . | Malawi | 602.34 | | Kuwait | -3.64 |
| 211 | Mali | 60.44 | Japan | 6.00 | Macau | . | St Martin (Fr) | . | Somalia | 597.46 | | Marshall Islands | -3.93 |
| 212 | Somalia | 58.82 | Puerto Rico | 5.80 | N. Mariana Is. | . | Turks & Caicos | . | Madagascar | 506.16 | | North Korea | -4.50 |
| 213 | South Sudan | 57.62 | Ukraine | 5.63 | New Caledonia | . | Virgin Is. (US) | . | C. African Rep. | 495.98 | | Eq. Guinea | -5.09 |
| 214 | C. African Rep. | 57.41 | San Marino | 5.60 | S. Maarten (D) | . | Channel Islands | . | Yemen | 477.41 | | Ireland | -5.53 |
| 215 | Lesotho | 57.38 | Macau | 5.50 | St Martin (Fr) | . | Curacao | . | Afghanistan | 415.71 | | South Sudan | -10.79 |
| 216 | Chad | 55.07 | South Korea | 4.50 | Turks & Caicos | . | Faroe Islands | . | Eritrea | 314.36 | | Timor Leste | -18.12 |
| 217 | Nigeria | 54.46 | Hong Kong | 4.40 | Virgin Is. (US) | . | Fr. Polynesia | . | Burundi | 193.01 | | Sudan | -20.11 |

## Supplementary Table 6 (cont.). Objective Indicators – Global Countries Ranked

| Rank | Economics | | | | Governance | | | | | | | |
| --- | --- | --- | --- | --- | --- | --- | --- | --- | --- | --- | --- | --- |
| **Gini Index**  *higher score = worse*  *higher rank = better* | | **Unemployment**  % of total labor force  *higher score = worse*  *higher rank = better* | | **Military Expenditure**  % of GDP  *higher score = worse*  *higher rank = better* | | **Global Peace Index**  *higher score = worse*  *higher rank = better* | | **Democracy Index**  *higher score = better*  *higher rank = better* | | **Civil Liberties Index**  *higher score = better*  *higher rank = better* | |
| 1 | Faroe Islands | 21.1 | Qatar | 0.13 | Costa Rica | 0.00 | Iceland | 1.11 | Norway | 9.81 | New Zealand | 10.00 |
| 2 | Br. Virgin Is. | 23.0 | Cambodia | 0.27 | Haiti | 0.05 | Ireland | 1.30 | New Zealand | 9.61 | Australia | 10.00 |
| 3 | Slovakia | 24.1 | Niger | 0.36 | S. Tome & Prin | 0.10 | Austria | 1.31 | Iceland | 9.45 | Iceland | 9.71 |
| 4 | Slovenia | 24.3 | Thailand | 0.69 | Iceland | 0.13 | New Zealand | 1.32 | Sweden | 9.39 | Finland | 9.71 |
| 5 | Belarus | 24.4 | Faroe Islands | 0.70 | Mauritius | 0.15 | Singapore | 1.34 | Finland | 9.30 | Luxembourg | 9.71 |
| 6 | Moldova | 25.7 | Chad | 1.09 | Zimbabwe | 0.25 | Denmark | 1.38 | Denmark | 9.28 | Uruguay | 9.71 |
| 7 | Ukraine | 25.6 | Burundi | 0.90 | Laos | 0.23 | Portugal | 1.37 | Ireland | 9.19 | Costa Rica | 9.71 |
| 8 | Liechtenstein | 24.7 | Isle of Man | 0.70 | Ireland | 0.22 | Switzerland | 1.35 | Switzerland | 9.14 | Norway | 9.41 |
| 9 | Netherlands | 25.7 | Bahrain | 1.10 | Papua N. G. | 0.31 | Slovenia | 1.40 | Netherlands | 9.00 | Sweden | 9.41 |
| 10 | Iceland | 26.1 | Laos | 1.22 | Ghana | 0.39 | Malaysia | 1.43 | Luxembourg | 8.81 | Denmark | 9.41 |
| 11 | Czech | 26.2 | Monaco | 1.23 | Guatemala | 0.41 | Canada | 1.45 | Germany | 8.80 | Switzerland | 9.41 |
| 12 | Kyrgyzstan | 26.4 | Vietnam | 1.43 | Argentina | 0.47 | Czech | 1.46 | Canada | 8.69 | Netherlands | 9.41 |
| 13 | Azerbaijan | 26.6 | Solomon Islands | 1.47 | Venezuela | 0.50 | Hungary | 1.50 | Australia | 8.66 | Germany | 9.41 |
| 14 | U.A.E. | 26.4 | Moldova | 1.43 | Kazakhstan | 0.48 | Finland | 1.47 | Uruguay | 8.66 | Ireland | 9.12 |
| 15 | Belgium | 26.6 | Cuba | 1.53 | Cape Verde | 0.53 | Croatia | 1.50 | Japan | 8.40 | Japan | 9.12 |
| 16 | Syria | 26.6 | Timor Leste | 1.60 | Nicaragua | 0.55 | Belgium | 1.51 | Costa Rica | 8.29 | UK | 9.12 |
| 17 | Tonga | 27.1 | Benin | 1.72 | Moldova | 0.55 | Japan | 1.53 | Austria | 8.28 | Chile | 9.12 |
| 18 | Monaco | 27.5 | Togo | 1.94 | Malta | 0.56 | Netherlands | 1.53 | UK | 8.28 | Czech | 9.12 |
| 19 | Algeria | 27.6 | U.A.E. | 2.13 | Sierra Leone | 0.56 | Australia | 1.54 | Greece | 8.14 | Canada | 8.82 |
| 20 | Kiribati | 27.8 | Tonga | 2.19 | Bahamas | 0.60 | Mauritius | 1.58 | Mauritius | 8.14 | Greece | 8.82 |
| 21 | Norway | 27.7 | Philippines | 2.15 | Guyana | 0.59 | Bhutan | 1.56 | South Sudan | 8.12 | Mauritius | 8.82 |
| 22 | Finland | 27.7 | Kuwait | 2.14 | Gambia | 0.58 | Germany | 1.54 | South Korea | 8.09 | South Korea | 8.82 |
| 23 | Armenia | 27.9 | Guatemala | 2.22 | Mongolia | 0.60 | Spain | 1.60 | France | 8.07 | Estonia | 8.82 |
| 24 | Denmark | 28.3 | Cote d'Ivoire | 2.29 | Mexico | 0.66 | Estonia | 1.62 | Spain | 8.07 | Portugal | 8.82 |
| 25 | Bhutan | 28.5 | Macau | 2.44 | Madagascar | 0.66 | Kuwait | 1.62 | Chile | 7.98 | Cyprus | 8.82 |
| 26 | Poland | 28.5 | Poland | 2.47 | Indonesia | 0.68 | Bulgaria | 1.63 | Czech | 7.97 | Lithuania | 8.82 |
| 27 | Timor Leste | 28.7 | Czech | 2.51 | Switzerland | 0.70 | Slovakia | 1.63 | Estonia | 7.96 | Austria | 8.53 |
| 28 | Croatia | 28.9 | Russia | 2.53 | Benin | 0.71 | Norway | 1.64 | Malta | 7.93 | South Sudan | 8.53 |
| 29 | Kosovo | 29.0 | Japan | 2.56 | South Africa | 0.73 | Qatar | 1.66 | United States | 7.85 | Spain | 8.53 |
| 30 | Hungary | 29.2 | Tanzania | 2.58 | Dominican Rep. | 0.74 | Latvia | 1.66 | Israel | 7.80 | Malta | 8.53 |
| 31 | Kazakhstan | 29.2 | Palau | 2.60 | Luxembourg | 0.75 | Lithuania | 1.67 | Portugal | 7.75 | United States | 8.53 |
| 32 | Maldives | 29.3 | South Korea | 2.60 | Ethiopia | 0.79 | Poland | 1.68 | Slovenia | 7.75 | Slovenia | 8.53 |
| 33 | Afghanistan | 29.4 | Guinea-Bissau | 2.62 | Barbados | 0.80 | Italy | 1.69 | Botswana | 7.73 | Botswana | 8.53 |
| 34 | Albania | 29.4 | Malta | 2.70 | Nigeria | 0.81 | UK | 1.70 | Italy | 7.69 | Cape Verde | 8.53 |
| 35 | Iraq | 29.5 | Mexico | 2.71 | Bos. & Herz. | 0.81 | Montenegro | 1.75 | Cape Verde | 7.65 | Belgium | 8.53 |
| 36 | Guinea | 29.6 | Papua N. G. | 2.74 | Belize | 0.82 | Romania | 1.76 | Belgium | 7.64 | Latvia | 8.53 |
| 37 | Pakistan | 29.6 | Hong Kong | 2.79 | Austria | 0.84 | Oman | 1.76 | Cyprus | 7.38 | Slovakia | 8.53 |
| 38 | Sweden | 29.8 | El Salvador | 2.84 | Egypt | 0.87 | N. Macedonia | 1.76 | Latvia | 7.38 | Jamaica | 8.53 |
| 39 | Cuba | 30.1 | Bhutan | 2.86 | Trin. & Tobago | 0.89 | Sweden | 1.78 | Lithuania | 7.31 | France | 8.24 |
| 40 | Ireland | 30.1 | North Korea | 2.86 | Cote d'Ivoire | 0.89 | Greece | 1.79 | Malaysia | 7.29 | Panama | 7.94 |
| 41 | Austria | 30.7 | Liberia | 2.88 | Tonga | 0.90 | Vietnam | 1.80 | India | 7.18 | Argentina | 7.94 |
| 42 | Fiji | 30.7 | Uganda | 2.94 | Kenya | 0.91 | Albania | 1.81 | Poland | 7.18 | Namibia | 7.94 |
| 43 | Libya | 30.7 | Nigeria | 2.99 | Paraguay | 0.91 | Madagascar | 1.84 | Trin. & Tobago | 7.16 | Hong Kong | 7.94 |
| 44 | Myanmar | 30.7 | Senegal | 2.99 | Sudan | 0.92 | Mongolia | 1.85 | Slovakia | 7.07 | Suriname | 7.65 |
| 45 | Oman | 30.7 | Ghana | 3.01 | Malaysia | 0.93 | South Korea | 1.85 | Jamaica | 7.06 | Colombia | 7.65 |
| 46 | Malta | 31.4 | Mali | 3.06 | Malawi | 1.01 | Laos | 1.86 | Timor Leste | 7.06 | Bulgaria | 7.65 |
| 47 | Uzbekistan | 31.2 | Madagascar | 3.01 | Cameroon | 0.93 | Argentina | 1.86 | South Africa | 7.05 | Papua N. G. | 7.65 |
| 48 | Cyprus | 31.3 | Myanmar | 3.03 | Bhutan | 1.00 | Indonesia | 1.86 | Panama | 6.91 | Italy | 7.35 |
| 49 | Mongolia | 31.4 | Bolivia | 3.09 | Bangladesh | 1.02 | Botswana | 1.86 | Suriname | 6.88 | Poland | 7.35 |
| 50 | Estonia | 31.8 | Israel | 3.15 | San Marino | 1.10 | U.A.E. | 1.90 | Hungary | 6.72 | Trin. & Tobago | 7.35 |
| 51 | Canada | 31.7 | Sierra Leone | 3.13 | Brazil | 1.08 | Uruguay | 1.89 | Brazil | 6.68 | Timor Leste | 7.35 |
| 52 | France | 31.5 | Iceland | 3.11 | Nepal | 1.08 | Timor Leste | 1.88 | Montenegro | 6.67 | South Africa | 7.35 |
| 53 | Lebanon | 31.8 | Oman | 3.16 | Peru | 1.12 | Serbia | 1.93 | Philippines | 6.66 | Brazil | 7.35 |
| 54 | Egypt | 31.9 | Singapore | 3.18 | Tanzania | 1.15 | Ghana | 1.94 | Argentina | 6.62 | Philippines | 7.35 |
| 55 | Mauritania | 32.0 | Kyrgyzstan | 3.29 | Gabon | 1.15 | Zambia | 1.95 | Colombia | 6.55 | Romania | 7.35 |
| 56 | Seychelles | 32.1 | Indonesia | 3.30 | Congo (DRC) | 1.16 | Costa Rica | 1.95 | Indonesia | 6.53 | Dominican Rep. | 7.35 |
| 57 | Vanuatu | 32.3 | Slovenia | 3.36 | Thailand | 1.17 | Kazakhstan | 1.95 | Namibia | 6.52 | Serbia | 7.35 |
| 58 | Germany | 32.4 | Belarus | 3.36 | Japan | 1.20 | Uzbekistan | 1.96 | Croatia | 6.50 | N. Macedonia | 7.35 |
| 59 | Nauru | 32.4 | Ethiopia | 3.40 | Belgium | 1.21 | Bos. & Herz. | 1.96 | Mongolia | 6.48 | Paraguay | 7.35 |
| 60 | UK | 32.4 | Germany | 3.41 | New Zealand | 1.22 | Namibia | 1.97 | Romania | 6.45 | Montenegro | 7.06 |
| 61 | New Zealand | 32.5 | Cameroon | 3.52 | Tajikistan | 1.22 | Moldova | 1.98 | Dominican Rep. | 6.44 | Albania | 7.06 |
| 62 | Luxembourg | 32.7 | Mozambique | 3.53 | Jamaica | 1.22 | Chile | 1.98 | Bulgaria | 6.41 | Hungary | 6.76 |
| 63 | India | 32.8 | Netherlands | 3.60 | Philippines | 1.25 | Tanzania | 1.99 | Thailand | 6.35 | Croatia | 6.76 |
| 64 | Nepal | 32.8 | Andorra | 3.70 | Kosovo | 1.25 | Sierra Leone | 1.99 | Serbia | 6.33 | Guyana | 6.76 |
| 65 | Japan | 32.9 | Malaysia | 3.83 | Timor Leste | 1.26 | Bolivia | 2.01 | Ghana | 6.30 | Moldova | 6.76 |
| 66 | Greece | 32.9 | St Kitts & Nevis | 3.78 | Panama | 1.26 | Jordan | 2.00 | Albania | 6.28 | Singapore | 6.47 |
| 67 | Niger | 32.9 | Comoros | 3.88 | Rwanda | 1.27 | Liberia | 2.03 | Guyana | 6.26 | Peru | 6.47 |
| 68 | Bos. & Herz. | 33.0 | Norway | 3.97 | Canada | 1.29 | Tajikistan | 2.04 | Moldova | 6.23 | Mongolia | 6.18 |
| 69 | South Korea | 32.9 | Saudi Arabia | 3.90 | El Salvador | 1.28 | Cambodia | 2.03 | Singapore | 6.18 | Sri Lanka | 6.18 |
| 70 | Bangladesh | 33.4 | Bulgaria | 4.10 | Zambia | 1.30 | Paraguay | 2.04 | Sri Lanka | 6.17 | Lesotho | 6.18 |
| 71 | Guinea-Bissau | 33.4 | United States | 4.11 | Fiji | 1.32 | Tunisia | 2.04 | Lesotho | 6.06 | Malawi | 6.18 |
| 72 | Serbia | 33.1 | Australia | 4.07 | Somalia | 1.30 | Angola | 2.04 | N. Macedonia | 6.03 | Malaysia | 5.88 |
| 73 | Georgia | 33.5 | Switzerland | 4.11 | Angola | 1.33 | Thailand | 2.05 | Papua N. G. | 6.03 | India | 5.88 |
| 74 | N. Macedonia | 33.5 | UK | 4.11 | Slovenia | 1.34 | Armenia | 2.05 | Paraguay | 6.00 | Thailand | 5.88 |
| 75 | Jordan | 33.7 | India | 4.20 | Bolivia | 1.39 | Kyrgyzstan | 2.05 | Bangladesh | 5.87 | Ghana | 5.88 |
| 76 | Palestinian Ter. | 33.7 | Turkmenistan | 4.30 | Guinea-Bissau | 1.46 | Morocco | 2.05 | Malawi | 5.85 | Ecuador | 5.88 |
| 77 | Switzerland | 33.7 | Fiji | 4.31 | Senegal | 1.47 | Malawi | 2.06 | Peru | 5.81 | Bos. & Herz. | 5.88 |
| 78 | Tunisia | 33.7 | Seychelles | 4.31 | Sweden | 1.47 | Nepal | 2.07 | Zambia | 5.80 | Guatemala | 5.88 |
| 79 | Greenland | 33.9 | Ireland | 4.37 | Turkey | 1.50 | Bahrain | 2.07 | Liberia | 5.57 | Israel | 5.59 |
| 80 | Romania | 33.9 | Hungary | 4.43 | Spain | 1.51 | Gambia | 2.08 | Fiji | 5.55 | Zambia | 5.59 |
| 81 | Tajikistan | 34.0 | Trin. & Tobago | 4.55 | Germany | 1.52 | Senegal | 2.08 | Bhutan | 5.54 | Liberia | 5.59 |
| 82 | Spain | 33.9 | Uzbekistan | 4.49 | Portugal | 1.52 | Turkmenistan | 2.08 | Tunisia | 5.51 | Senegal | 5.59 |
| 83 | Sudan | 34.2 | Samoa | 4.55 | Czech | 1.52 | Guinea-Bissau | 2.09 | Senegal | 5.48 | Georgia | 5.59 |
| 84 | Australia | 34.3 | Congo (DRC) | 4.56 | Netherlands | 1.53 | France | 2.09 | Armenia | 5.42 | Mexico | 5.59 |
| 85 | Latvia | 34.3 | China | 4.57 | Lesotho | 1.54 | Trin. & Tobago | 2.09 | Ecuador | 5.41 | Bolivia | 5.59 |
| 86 | Montenegro | 34.3 | Nicaragua | 4.57 | Honduras | 1.57 | China | 2.10 | Tanzania | 5.35 | Indonesia | 5.29 |
| 87 | Benin | 34.4 | Br. Virgin Is. | 4.60 | Eswatini | 1.57 | Cyprus | 2.10 | Madagascar | 5.26 | Armenia | 5.29 |
| 88 | San Marino | 34.6 | Maldives | 4.64 | Eq. Guinea | 1.59 | Algeria | 2.11 | Hong Kong | 5.24 | Honduras | 5.29 |
| 89 | Iran | 34.8 | Ecuador | 4.77 | Norway | 1.61 | Rwanda | 2.12 | Georgia | 5.20 | Nepal | 5.29 |
| 90 | Portugal | 34.6 | Bangladesh | 4.68 | Italy | 1.61 | Jamaica | 2.12 | Mexico | 5.14 | Kyrgyzstan | 5.29 |
| 91 | Italy | 34.8 | Kazakhstan | 4.79 | Romania | 1.61 | Cote d'Ivoire | 2.12 | Ukraine | 5.06 | Fiji | 5.00 |
| 92 | Andorra | 35.0 | New Zealand | 4.87 | Montenegro | 1.63 | Eq. Guinea | 2.13 | Kenya | 5.05 | Tunisia | 5.00 |
| 93 | Thailand | 34.9 | Peru | 4.83 | Chile | 1.63 | Bangladesh | 2.13 | Morocco | 5.04 | El Salvador | 5.00 |
| 94 | Ethiopia | 35.0 | Jamaica | 4.89 | Sri Lanka | 1.64 | Mauritania | 2.14 | Bos. & Herz. | 5.00 | Sierra Leone | 5.00 |
| 95 | Nigeria | 35.1 | Sri Lanka | 5.00 | China | 1.67 | Panama | 2.14 | Honduras | 4.98 | Haiti | 5.00 |
| 96 | Qatar | 35.1 | Malawi | 5.05 | Georgia | 1.68 | Dominican Rep. | 2.16 | El Salvador | 4.71 | Bangladesh | 4.71 |
| 97 | Russia | 35.1 | Vanuatu | 5.06 | N. Macedonia | 1.70 | Cuba | 2.16 | Benin | 4.68 | Bhutan | 4.71 |
| 98 | Cote d'Ivoire | 35.3 | Brunei | 5.14 | Seychelles | 1.71 | Peru | 2.18 | Nepal | 4.60 | Tanzania | 4.71 |
| 99 | Liberia | 35.3 | Burkina Faso | 5.17 | Mozambique | 1.73 | Georgia | 2.20 | Uganda | 4.49 | Uganda | 4.71 |
| 100 | Marshall Islands | 35.5 | Guinea | 5.23 | Albania | 1.74 | Sri Lanka | 2.20 | Gambia | 4.47 | Madagascar | 4.41 |
| 101 | China | 35.7 | Slovakia | 5.23 | Croatia | 1.78 | Saudi Arabia | 2.21 | Guatemala | 4.47 | Ukraine | 4.41 |
| 102 | Mali | 35.7 | Croatia | 5.24 | Belarus | 1.80 | Eswatini | 2.21 | Turkey | 4.33 | Benin | 4.41 |
| 103 | Sierra Leone | 35.7 | Romania | 5.38 | Vietnam | 1.81 | Philippines | 2.21 | Sierra Leone | 4.32 | Nigeria | 4.41 |
| 104 | Isle of Man | 36.0 | Mongolia | 5.42 | Cyprus | 1.82 | Egypt | 2.21 | Nigeria | 4.23 | Mauritania | 4.41 |
| 105 | Indonesia | 36.1 | Kenya | 5.43 | Afghanistan | 1.83 | Azerbaijan | 2.25 | Cote d'Ivoire | 4.22 | Niger | 4.41 |
| 106 | Vietnam | 36.1 | Austria | 5.44 | Bulgaria | 1.85 | El Salvador | 2.25 | Bolivia | 4.20 | Kenya | 4.12 |
| 107 | Senegal | 36.2 | Pakistan | 5.47 | Australia | 1.92 | Mozambique | 2.25 | Angola | 4.18 | Morocco | 4.12 |
| 108 | Cambodia | 36.6 | Puerto Rico | 5.47 | Denmark | 1.95 | Rep. of Congo | 2.26 | Mauritania | 4.14 | Gambia | 4.12 |
| 109 | Lithuania | 36.7 | Dominican Rep. | 5.47 | Uganda | 1.98 | Barbados | 2.29 | Kyrgyzstan | 3.70 | Lebanon | 4.12 |
| 110 | Yemen | 36.7 | Venezuela | 5.48 | Uruguay | 2.00 | Guyana | 2.29 | Algeria | 3.66 | Pakistan | 4.12 |
| 111 | Mauritius | 36.8 | Mauritius | 5.48 | Rep. of Congo | 2.00 | Belarus | 2.29 | Qatar | 3.65 | Cote d'Ivoire | 3.82 |
| 112 | Brunei | 37.0 | Eritrea | 5.55 | France | 2.06 | Benin | 2.31 | Lebanon | 3.56 | Algeria | 3.82 |
| 113 | Somalia | 36.8 | Belgium | 5.49 | Slovakia | 2.02 | Nicaragua | 2.30 | Fr. Polynesia | 3.54 | Fr. Polynesia | 3.82 |
| 114 | Dominican Rep. | 37.0 | Guam | 5.59 | Iran | 2.06 | Papua N. G. | 2.32 | Mozambique | 3.51 | Oman | 3.82 |
| 115 | Solomon Islands | 37.1 | Denmark | 5.59 | Niger | 2.07 | India | 2.32 | Kuwait | 3.50 | Afghanistan | 3.82 |
| 116 | Burkina Faso | 37.4 | Azerbaijan | 5.59 | Iraq | 2.07 | Guatemala | 2.33 | Palestinian Ter. | 3.47 | Qatar | 3.53 |
| 117 | Chad | 37.4 | Cyprus | 5.60 | Cambodia | 2.09 | Gabon | 2.37 | Ethiopia | 3.37 | Mozambique | 3.53 |
| 118 | Burundi | 37.5 | Cayman Islands | 5.70 | Guinea | 2.13 | Djibouti | 2.37 | Rwanda | 3.30 | Palestinian Ter. | 3.53 |
| 119 | Eritrea | 37.6 | St Martin (Fr) | 5.83 | Hungary | 2.13 | Togo | 2.38 | Pakistan | 3.25 | Comoros | 3.53 |
| 120 | Sri Lanka | 37.7 | C. African Rep. | 5.90 | UK | 2.26 | Zimbabwe | 2.40 | Oman | 3.12 | Burkina Faso | 3.53 |
| 121 | Israel | 37.9 | Luxembourg | 5.94 | Latvia | 2.27 | Kenya | 2.41 | Kazakhstan | 3.08 | Mali | 3.53 |
| 122 | Togo | 37.9 | Zambia | 5.96 | C. African Rep. | 2.29 | Honduras | 2.42 | Cambodia | 3.05 | Kuwait | 3.24 |
| 123 | Gabon | 38.0 | Honduras | 6.06 | Ecuador | 2.30 | Guinea | 2.42 | Comoros | 3.04 | Zimbabwe | 3.24 |
| 124 | Malawi | 38.5 | San Marino | 6.10 | Tunisia | 2.36 | Uganda | 2.48 | Jordan | 3.04 | Rep. of Congo | 3.24 |
| 125 | N. Mariana Is. | 38.6 | Channel Islands | 6.26 | Finland | 2.42 | South Africa | 2.51 | Zimbabwe | 3.04 | Kazakhstan | 2.94 |
| 126 | Palau | 38.0 | Paraguay | 6.09 | Liberia | 2.30 | Lesotho | 2.46 | U.A.E. | 3.01 | Jordan | 2.94 |
| 127 | Samoa | 38.7 | Portugal | 6.38 | Botswana | 2.53 | Burundi | 2.57 | Togo | 2.99 | Togo | 2.94 |
| 128 | Kenya | 38.7 | Marshall Islands | 6.30 | India | 2.44 | Libya | 2.53 | Egypt | 2.93 | Eswatini | 2.94 |
| 129 | El Salvador | 38.8 | Canada | 6.45 | Mauritania | 2.55 | Ecuador | 2.57 | Iraq | 2.88 | Cuba | 2.94 |
| 130 | Gambia | 38.8 | Gambia | 6.50 | Singapore | 2.66 | Brazil | 2.59 | Haiti | 2.81 | Gabon | 2.94 |
| 131 | Laos | 38.8 | Panama | 6.52 | Lithuania | 2.72 | United States | 2.62 | Azerbaijan | 2.80 | Angola | 2.65 |
| 132 | Bulgaria | 39.0 | Latvia | 6.72 | Namibia | 2.74 | Iran | 2.68 | Rep. of Congo | 2.79 | Rwanda | 2.65 |
| 133 | Morocco | 39.5 | Bermuda | 7.00 | Serbia | 2.85 | Eritrea | 2.75 | Eswatini | 2.78 | Azerbaijan | 2.65 |
| 134 | Fr. Polynesia | 39.7 | Egypt | 7.20 | Estonia | 2.87 | Cameroon | 2.77 | Burkina Faso | 2.73 | Vietnam | 2.65 |
| 135 | Tuvalu | 39.1 | Italy | 6.78 | Pakistan | 2.80 | Lebanon | 2.69 | Djibouti | 2.70 | Nicaragua | 2.65 |
| 136 | Suriname | 39.2 | Belize | 7.00 | South Korea | 2.81 | Chad | 2.70 | Cuba | 2.65 | U.A.E. | 2.35 |
| 137 | Barbados | 40.0 | Suriname | 7.33 | Colombia | 2.87 | Mexico | 2.78 | Vietnam | 2.62 | Djibouti | 2.35 |
| 138 | Cayman Islands | 40.0 | France | 7.37 | Cuba | 2.88 | Turkey | 2.78 | Mali | 2.58 | Guinea-Bissau | 2.35 |
| 139 | Channel Islands | 40.0 | Serbia | 7.39 | Turkmenistan | 2.90 | Pakistan | 2.78 | Cameroon | 2.56 | Venezuela | 2.35 |
| 140 | Micronesia | 40.1 | Lithuania | 7.50 | Chad | 2.91 | Niger | 2.79 | Bahrain | 2.52 | Libya | 2.35 |
| 141 | Jamaica | 40.2 | Barbados | 7.53 | Brunei | 2.97 | Venezuela | 2.82 | Guinea-Bissau | 2.45 | Chad | 2.35 |
| 142 | St Vin. & Gren, | 40.2 | Brazil | 7.63 | Libya | 3.15 | Ethiopia | 2.85 | Niger | 2.37 | C. African Rep. | 2.35 |
| 143 | Trin. & Tobago | 40.2 | Sudan | 7.53 | Bahrain | 3.11 | Haiti | 2.83 | Venezuela | 2.31 | Myanmar | 2.35 |
| 144 | Peru | 40.3 | Aruba | 7.77 | Maldives | 3.20 | Palestinian Ter. | 2.87 | Nicaragua | 2.26 | Turkey | 2.06 |
| 145 | Am. Samoa | 40.5 | Eq. Guinea | 7.82 | Greece | 3.23 | Colombia | 2.89 | Russia | 2.22 | Cambodia | 2.06 |
| 146 | Tanzania | 40.5 | Estonia | 7.83 | Ant. & Barbuda | 3.30 | Nigeria | 2.91 | Guinea | 2.21 | Cameroon | 2.06 |
| 147 | Uruguay | 40.6 | Costa Rica | 7.85 | United States | 3.36 | Myanmar | 2.94 | Gabon | 2.18 | Russia | 2.06 |
| 148 | Argentina | 40.7 | Argentina | 7.88 | Uzbekistan | 3.56 | Burkina Faso | 2.97 | Burundi | 2.13 | Guinea | 2.06 |
| 149 | Malaysia | 40.7 | Finland | 8.26 | Kyrgyzstan | 3.62 | C. African Rep. | 3.01 | China | 2.12 | Egypt | 1.76 |
| 150 | Philippines | 40.7 | Uruguay | 8.40 | Morocco | 3.64 | Iraq | 3.05 | Uzbekistan | 2.12 | Bahrain | 1.76 |
| 151 | S. Tome & Prin | 40.7 | Turkey | 8.45 | Burundi | 3.66 | North Korea | 3.06 | Saudi Arabia | 2.08 | Burundi | 1.76 |
| 152 | Turkmenistan | 40.8 | Bahamas | 8.46 | Solomon Islands | 3.70 | Somalia | 3.09 | Belarus | 1.99 | Ethiopia | 1.47 |
| 153 | Bolivia | 40.9 | Sweden | 8.53 | Myanmar | 3.79 | Mali | 3.10 | Eritrea | 1.97 | Saudi Arabia | 1.47 |
| 154 | Haiti | 41.1 | Ant. & Barbuda | 8.53 | Mali | 3.83 | Israel | 3.12 | Iran | 1.96 | Belarus | 1.47 |
| 155 | United States | 41.3 | Zimbabwe | 8.55 | Poland | 3.83 | Syria | 3.17 | Yemen | 1.95 | Iran | 1.47 |
| 156 | Djibouti | 41.6 | Kiribati | 8.56 | Burkina Faso | 4.01 | Russia | 3.25 | Tajikistan | 1.94 | Eq. Guinea | 1.47 |
| 157 | Gibraltar | 41.7 | Morocco | 8.94 | Togo | 4.01 | Congo (DRC) | 3.26 | Eq. Guinea | 1.92 | Iraq | 1.18 |
| 158 | Papua N. G. | 41.9 | Chile | 9.06 | Azerbaijan | 4.60 | Ukraine | 3.28 | Libya | 1.78 | Uzbekistan | 0.88 |
| 159 | Cameroon | 42.2 | S. Tome & Prin | 9.17 | Kuwait | 4.90 | Afghanistan | 3.29 | Sudan | 1.76 | Yemen | 0.88 |
| 160 | Cape Verde | 42.4 | Iran | 9.19 | Jordan | 4.91 | South Sudan | 3.32 | Laos | 1.71 | Tajikistan | 0.88 |
| 161 | Madagascar | 42.6 | Colombia | 9.61 | Yemen | 4.92 | Sudan | 3.33 | Congo (DRC) | 1.68 | Sudan | 0.88 |
| 162 | Uganda | 42.7 | Ukraine | 9.83 | Djibouti | 5.07 | Yemen | 3.40 | Chad | 1.67 | Congo (DRC) | 0.88 |
| 163 | C. African Rep. | 43.0 | Turks & Caicos | 10.00 | Israel | 5.32 | Am. Samoa | . | Turkmenistan | 1.66 | China | 0.59 |
| 164 | Chile | 43.0 | Greece | 10.13 | Oman | 5.40 | Andorra | . | Syria | 1.43 | Eritrea | 0.29 |
| 165 | Macau | 43.0 | Guyana | 10.17 | Armenia | 5.45 | Ant. & Barbuda | . | C. African Rep. | 1.18 | Laos | 0.29 |
| 166 | New Caledonia | 43.0 | Albania | 10.25 | Syria | 5.45 | Aruba | . | North Korea | 1.08 | Turkmenistan | 0.29 |
| 167 | Ghana | 43.5 | Mauritania | 10.37 | Russia | 5.86 | Bahamas | . | Myanmar | 0.85 | Syria | 0.00 |
| 168 | Mexico | 43.5 | Nepal | 10.71 | South Sudan | 6.26 | Belize | . | Afghanistan | 0.26 | North Korea | 0.00 |
| 169 | Rwanda | 43.7 | Bos. & Herz. | 10.72 | Qatar | 6.96 | Bermuda | . | Am. Samoa | . | Am. Samoa | . |
| 170 | South Sudan | 44.1 | Algeria | 11.43 | Lebanon | 8.91 | Br. Virgin Is. | . | Andorra | . | Andorra | . |
| 171 | Dominica | 44.0 | Spain | 11.39 | U.A.E. | 8.32 | Brunei | . | Ant. & Barbuda | . | Ant. & Barbuda | . |
| 172 | St Lucia | 43.7 | St Lucia | 10.93 | Saudi Arabia | 7.09 | Cape Verde | . | Aruba | . | Aruba | . |
| 173 | Grenada | 43.8 | New Caledonia | 11.15 | Algeria | 8.17 | Cayman Islands | . | Bahamas | . | Bahamas | . |
| 174 | Turkey | 44.4 | Georgia | 11.48 | North Korea | 26.00 | Channel Islands | . | Barbados | . | Barbados | . |
| 175 | St Kitts & Nevis | 44.5 | Tajikistan | 11.64 | Eritrea | 32.66 | Comoros | . | Belize | . | Belize | . |
| 176 | Ecuador | 44.6 | Fr. Polynesia | 11.75 | Ukraine | 36.65 | Curacao | . | Bermuda | . | Bermuda | . |
| 177 | Congo (DRC) | 44.7 | Cape Verde | 11.88 | Am. Samoa | . | Dominica | . | Br. Virgin Is. | . | Br. Virgin Is. | . |
| 178 | Venezuela | 44.7 | Rwanda | 11.99 | Andorra | . | Faroe Islands | . | Brunei | . | Brunei | . |
| 179 | Lesotho | 44.9 | Virgin Is. (US) | 12.01 | Aruba | . | Fiji | . | Cayman Islands | . | Cayman Islands | . |
| 180 | Guyana | 45.0 | South Sudan | 12.48 | Bermuda | . | Fr. Polynesia | . | Channel Islands | . | Channel Islands | . |
| 181 | Paraguay | 45.1 | Syria | 12.96 | Br. Virgin Is. | . | Gibraltar | . | Curacao | . | Curacao | . |
| 182 | Comoros | 45.3 | Afghanistan | 13.30 | Cayman Islands | . | Greenland | . | Dominica | . | Dominica | . |
| 183 | Saudi Arabia | 45.9 | Armenia | 13.33 | Channel Islands | . | Grenada | . | Faroe Islands | . | Faroe Islands | . |
| 184 | Singapore | 45.9 | N. Macedonia | 13.42 | Comoros | . | Guam | . | Gibraltar | . | Gibraltar | . |
| 185 | Nicaragua | 46.2 | Montenegro | 14.10 | Curacao | . | Hong Kong | . | Greenland | . | Greenland | . |
| 186 | Costa Rica | 46.7 | Angola | 14.46 | Dominica | . | Isle of Man | . | Grenada | . | Grenada | . |
| 187 | Honduras | 48.2 | Lebanon | 14.49 | Faroe Islands | . | Kiribati | . | Guam | . | Guam | . |
| 188 | Guatemala | 48.3 | Haiti | 15.06 | Fr. Polynesia | . | Kosovo | . | Isle of Man | . | Isle of Man | . |
| 189 | Panama | 48.9 | Iraq | 15.52 | Gibraltar | . | Liechtenstein | . | Kiribati | . | Kiribati | . |
| 190 | Rep. of Congo | 48.9 | Lesotho | 16.15 | Greenland | . | Luxembourg | . | Kosovo | . | Kosovo | . |
| 191 | Mozambique | 50.3 | Micronesia | 16.20 | Grenada | . | Macau | . | Liechtenstein | . | Liechtenstein | . |
| 192 | Zimbabwe | 50.3 | Tunisia | 16.20 | Guam | . | Maldives | . | Macau | . | Macau | . |
| 193 | Angola | 51.3 | Yemen | 17.09 | Hong Kong | . | Malta | . | Maldives | . | Maldives | . |
| 194 | Zambia | 51.5 | Jordan | 18.00 | Isle of Man | . | Marshall Islands | . | Marshall Islands | . | Marshall Islands | . |
| 195 | Aruba | 51.7 | St Vin. & Gren, | 18.06 | Kiribati | . | Micronesia | . | Micronesia | . | Micronesia | . |
| 196 | Brazil | 52.0 | Libya | 18.62 | Liechtenstein | . | Monaco | . | Monaco | . | Monaco | . |
| 197 | Belize | 53.3 | Somalia | 18.86 | Macau | . | N. Mariana Is. | . | N. Mariana Is. | . | N. Mariana Is. | . |
| 198 | Botswana | 53.3 | Namibia | 19.15 | Marshall Islands | . | Nauru | . | Nauru | . | Nauru | . |
| 199 | Hong Kong | 53.9 | Rep. of Congo | 19.69 | Micronesia | . | New Caledonia | . | New Caledonia | . | New Caledonia | . |
| 200 | Puerto Rico | 54.0 | Gabon | 20.06 | Monaco | . | Palau | . | Palau | . | Palau | . |
| 201 | Eswatini | 54.6 | Grenada | 20.97 | N. Mariana Is. | . | Puerto Rico | . | Puerto Rico | . | Puerto Rico | . |
| 202 | Colombia | 54.8 | Botswana | 23.14 | Nauru | . | S. Maarten (D) | . | S. Maarten (D) | . | S. Maarten (D) | . |
| 203 | Bahamas | 57.0 | Palestinian Ter. | 24.90 | New Caledonia | . | S. Tome & Prin | . | S. Tome & Prin | . | S. Tome & Prin | . |
| 204 | Namibia | 59.1 | Kosovo | 25.46 | Palau | . | Samoa | . | Samoa | . | Samoa | . |
| 205 | Bermuda | 63.0 | Djibouti | 25.88 | Palestinian Ter. | . | San Marino | . | San Marino | . | San Marino | . |
| 206 | South Africa | 63.0 | South Africa | 33.17 | Puerto Rico | . | Seychelles | . | Seychelles | . | Seychelles | . |
| 207 | Eq. Guinea | 65.0 | Eswatini | 34.40 | S. Maarten (D) | . | Solomon Islands | . | Solomon Islands | . | Solomon Islands | . |
| 208 | North Korea | 68.6 | Am. Samoa | . | Samoa | . | St Kitts & Nevis | . | Somalia | . | Somalia | . |
| 209 | Kuwait | 80.9 | Curacao | . | St Kitts & Nevis | . | St Lucia | . | St Kitts & Nevis | . | St Kitts & Nevis | . |
| 210 | Ant. & Barbuda | . | Dominica | . | St Lucia | . | St Martin (Fr) | . | St Lucia | . | St Lucia | . |
| 211 | Bahrain | . | Gibraltar | . | St Martin (Fr) | . | St Vin. & Gren, | . | St Martin (Fr) | . | St Martin (Fr) | . |
| 212 | Curacao | . | Greenland | . | St Vin. & Gren, | . | Suriname | . | St Vin. & Gren, | . | St Vin. & Gren, | . |
| 213 | Guam | . | Liechtenstein | . | Suriname | . | Tonga | . | Tonga | . | Tonga | . |
| 214 | S. Maarten (D) | . | N. Mariana Is. | . | Turks & Caicos | . | Turks & Caicos | . | Turks & Caicos | . | Turks & Caicos | . |
| 215 | St Martin (Fr) | . | Nauru | . | Tuvalu | . | Tuvalu | . | Tuvalu | . | Tuvalu | . |
| 216 | Turks & Caicos | . | S. Maarten (D) | . | Vanuatu | . | Vanuatu | . | Vanuatu | . | Vanuatu | . |
| 217 | Virgin Is. (US) | . | Tuvalu | . | Virgin Is. (US) | . | Virgin Is. (US) | . | Virgin Is. (US) | . | Virgin Is. (US) | . |

## Supplementary Table 6 (cont.). Objective Indicators – Global Countries Ranked

| Rank | Education | | | | | | Society | | | | | |
| --- | --- | --- | --- | --- | --- | --- | --- | --- | --- | --- | --- | --- |
| **Government Expenditure**  **on Education**  Total, % of GDP  *higher score = better*  *higher rank = better* | | **Expected Years of Schooling**  *higher score = better*  *higher rank = better* | | **Primary Completion Rate**  Total (% of relevant age group)  *higher score = better*  *higher rank = better* | | **Incarceration Rate**  Per 100,000 people  *higher score = worse*  *higher rank = better* | | **Intentional Homicides**  Per 100,000 people  *higher score = worse*  *higher rank = better* | | **Marriage Rate**  Marriages per 1,000 people  *higher score = better*  *higher rank = better* | |
| 1 | Kiribati | 14.20 | Monaco | 21.7 | Monaco | 150.18 | San Marino | 3 | Am. Samoa | 0 | Virgin Is. (US) | 34.2 |
| 2 | Tuvalu | 12.85 | Greece | 20.8 | Gibraltar | 137.43 | Yemen | 14 | Aruba | 0 | Ant. & Barbuda | 21.0 |
| 3 | Vanuatu | 10.64 | Australia | 20.7 | St Kitts & Nevis | 130.58 | Somalia | 16 | Bahrain | 0 | Turks & Caicos | 20.0 |
| 4 | Micronesia | 10.54 | Turkey | 19.8 | Saudi Arabia | 120.12 | Gambia | 22 | China | 0 | Br. Virgin Is. | 19.6 |
| 5 | Yemen | 9.66 | Finland | 19.5 | Vietnam | 115.85 | Faroe Islands | 26 | Czech | 0 | N. Mariana Is. | 17.4 |
| 6 | Cuba | 9.39 | New Zealand | 19.3 | Nepal | 115.04 | Guinea-Bissau | 31 | Hong Kong | 0 | Maldives | 16.7 |
| 7 | Namibia | 9.04 | Ireland | 19.2 | Fiji | 112.21 | Bangladesh | 31 | Ireland | 0 | Mongolia | 15.7 |
| 8 | Solomon Islands | 8.29 | Sweden | 19.0 | Nauru | 111.38 | Rep. of Congo | 27 | Isle of Man | 0 | Barbados | 14.1 |
| 9 | Botswana | 8.06 | Belgium | 19.0 | Turks & Caicos | 110.74 | Japan | 33 | Japan | 0 | Bermuda | 13.7 |
| 10 | Nauru | 7.81 | Iceland | 18.9 | Bangladesh | 108.21 | Iceland | 35 | Kuwait | 0 | Seychelles | 12.7 |
| 11 | Iraq | 7.72 | Argentina | 18.8 | Turkmenistan | 107.96 | Liechtenstein | 35 | Macau | 0 | Bangladesh | 12.5 |
| 12 | Bolivia | 7.58 | Norway | 18.8 | Georgia | 107.00 | Nigeria | 36 | Malta | 0 | Vietnam | 11.8 |
| 13 | Sweden | 7.57 | Denmark | 18.7 | St Vin. & Gren, | 106.98 | Burkina Faso | 39 | Oman | 0 | Syria | 10.6 |
| 14 | Marshall Islands | 7.54 | Netherlands | 18.6 | Montenegro | 106.73 | Guinea | 38 | Qatar | 0 | Jordan | 10.4 |
| 15 | St Vin. & Gren, | 7.21 | St Kitts & Nevis | 18.4 | Vanuatu | 106.60 | Mali | 40 | San Marino | 0 | Cayman Islands | 10.2 |
| 16 | Iceland | 7.14 | Seychelles | 18.2 | China | 106.38 | India | 41 | Senegal | 0 | North Korea | 9.7 |
| 17 | Kyrgyzstan | 6.83 | Tonga | 17.8 | Kazakhstan | 105.61 | Ghana | 42 | Singapore | 0 | Algeria | 9.6 |
| 18 | Sierra Leone | 6.79 | UK | 17.8 | North Korea | 105.45 | Afghanistan | 45 | Slovenia | 0 | Iraq | 9.6 |
| 19 | St Martin (Fr) | 6.75 | Spain | 17.8 | Bermuda | 104.99 | Pakistan | 45 | Switzerland | 0 | China | 9.6 |
| 20 | Tunisia | 6.73 | Slovenia | 17.5 | Morocco | 104.69 | Oman | 46 | Turks & Caicos | 0 | Kosovo | 9.6 |
| 21 | Lesotho | 6.69 | Portugal | 17.5 | Japan | 104.32 | Congo (DRC) | 46 | Tuvalu | 0 | Guam | 9.4 |
| 22 | Finland | 6.54 | Uruguay | 17.5 | Moldova | 104.14 | Comoros | 46 | U.A.E. | 0 | Ethiopia | 9.3 |
| 23 | Israel | 6.46 | Germany | 17.3 | Peru | 104.11 | Niger | 47 | Australia | 1 | Mauritius | 9.2 |
| 24 | Belgium | 6.36 | Saudi Arabia | 16.9 | Myanmar | 103.59 | Tanzania | 50 | Austria | 1 | Kazakhstan | 9.0 |
| 25 | Eswatini | 6.31 | Chile | 16.9 | Portugal | 103.52 | C. African Rep. | 52 | Belgium | 1 | Cyprus | 8.9 |
| 26 | N. Mariana Is. | 6.26 | Hong Kong | 16.9 | Kiribati | 103.29 | Finland | 52 | Benin | 1 | Jamaica | 8.7 |
| 27 | Moldova | 6.25 | Czech | 16.8 | Argentina | 103.23 | Sierra Leone | 52 | Bos. & Herz. | 1 | Fiji | 8.6 |
| 28 | Costa Rica | 6.25 | Georgia | 16.8 | Czech | 103.11 | Sudan | 52 | Brunei | 1 | Russia | 8.5 |
| 29 | Macau | 6.19 | Switzerland | 16.7 | Thailand | 103.04 | Liberia | 55 | Bulgaria | 1 | Comoros | 8.4 |
| 30 | Mozambique | 6.16 | Poland | 16.7 | Kenya | 102.73 | Norway | 55 | Burkina Faso | 1 | Kyrgyzstan | 8.4 |
| 31 | South Africa | 6.15 | Italy | 16.7 | S. Maarten (D) | 102.68 | Timor Leste | 55 | China | 1 | Tajikistan | 8.2 |
| 32 | Samoa | 6.11 | Singapore | 16.7 | Mexico | 102.24 | Chad | 56 | Croatia | 1 | Bahamas | 7.9 |
| 33 | Morocco | 6.02 | South Korea | 16.6 | Indonesia | 101.92 | Mauritania | 57 | Cyprus | 1 | Albania | 7.9 |
| 34 | Senegal | 5.99 | Barbados | 16.6 | Turkey | 101.50 | Papua N. G. | 57 | Denmark | 1 | Channel Islands | 7.8 |
| 35 | Ukraine | 5.93 | Grenada | 16.6 | Channel Islands | 101.48 | South Sudan | 58 | Egypt | 1 | Indonesia | 7.6 |
| 36 | Bhutan | 5.85 | Kosovo | 16.5 | Samoa | 101.34 | Togo | 59 | France | 1 | Hong Kong | 7.3 |
| 37 | Tajikistan | 5.81 | Latvia | 16.5 | Costa Rica | 101.00 | Andorra | 60 | Germany | 1 | Palestinian Ter. | 7.3 |
| 38 | Jamaica | 5.65 | Lithuania | 16.5 | Venezuela | 100.83 | Syria | 60 | Greece | 1 | Tunisia | 7.3 |
| 39 | Algeria | 5.61 | Marshall Islands | 16.4 | Lithuania | 100.61 | Eq. Guinea | 63 | Guinea-Bissau | 1 | Lebanon | 7.2 |
| 40 | Sudan | 5.50 | St Vin. & Gren, | 16.3 | Libya | 100.36 | Haiti | 63 | Hungary | 1 | Moldova | 7.2 |
| 41 | Brazil | 5.50 | Costa Rica | 16.3 | Namibia | 100.32 | Mozambique | 63 | Iceland | 1 | Egypt | 7.2 |
| 42 | Uzbekistan | 5.47 | Austria | 16.3 | Croatia | 100.28 | Netherlands | 64 | Indonesia | 1 | Tonga | 7.1 |
| 43 | France | 5.43 | Croatia | 16.3 | Chile | 100.27 | Angola | 65 | Italy | 1 | St Kitts & Nevis | 7.1 |
| 44 | United States | 5.43 | Cyprus | 16.2 | Uruguay | 100.22 | Vanuatu | 65 | Jordan | 1 | Belarus | 7.0 |
| 45 | Slovenia | 5.37 | France | 16.1 | Ecuador | 100.20 | Marshall Islands | 66 | Luxembourg | 1 | Hungary | 6.9 |
| 46 | Malta | 5.36 | Estonia | 16.0 | St Martin (Fr) | 100.09 | Qatar | 69 | Malaysia | 1 | Kiribati | 6.8 |
| 47 | Palestinian Ter. | 5.32 | United States | 15.9 | UK | 100.09 | Germany | 68 | Maldives | 1 | Uzbekistan | 6.8 |
| 48 | Denmark | 5.30 | Malta | 15.9 | Russia | 100.02 | Denmark | 69 | Mauritania | 1 | N. Macedonia | 6.6 |
| 49 | Burkina Faso | 5.28 | Kuwait | 15.9 | Sweden | 99.89 | Senegal | 69 | Micronesia | 1 | Bahrain | 6.4 |
| 50 | Estonia | 5.26 | Canada | 15.9 | Denmark | 99.89 | Malawi | 78 | N. Macedonia | 1 | Azerbaijan | 6.4 |
| 51 | Cyprus | 5.24 | Bahrain | 15.9 | Algeria | 99.68 | Switzerland | 77 | Netherlands | 1 | Georgia | 6.4 |
| 52 | New Zealand | 5.23 | Brazil | 15.8 | Australia | 99.67 | Djibouti | 74 | Norway | 1 | Trin. & Tobago | 6.3 |
| 53 | Australia | 5.21 | Bolivia | 15.6 | Singapore | 99.63 | Bos. & Herz. | 79 | Palestinian Ter. | 1 | Belize | 6.3 |
| 54 | Maldives | 5.17 | U.A.E. | 15.6 | Cyprus | 99.37 | Solomon Islands | 79 | Poland | 1 | Philippines | 6.1 |
| 55 | S. Tome & Prin | 5.16 | Algeria | 15.5 | Greece | 99.35 | Monaco | 81 | Portugal | 1 | San Marino | 6.1 |
| 56 | Tonga | 5.15 | Hungary | 15.5 | New Zealand | 99.33 | Armenia | 83 | Romania | 1 | Guyana | 6.1 |
| 57 | Saudi Arabia | 5.11 | Montenegro | 15.5 | Norway | 99.28 | Slovenia | 85 | Saudi Arabia | 1 | Libya | 6.0 |
| 58 | Netherlands | 5.05 | China | 15.5 | Netherlands | 99.26 | Uzbekistan | 85 | Serbia | 1 | Ukraine | 5.9 |
| 59 | Kuwait | 5.03 | Ant. & Barbuda | 15.5 | U.A.E. | 99.17 | Luxembourg | 89 | Slovakia | 1 | Puerto Rico | 5.8 |
| 60 | North Korea | 5.01 | Japan | 15.5 | Iceland | 98.95 | Canada | 90 | South Korea | 1 | Turkey | 5.8 |
| 61 | Chile | 5.00 | Vietnam | 15.5 | Malaysia | 98.77 | Nepal | 90 | Spain | 1 | Nauru | 5.7 |
| 62 | UK | 4.96 | Liechtenstein | 15.4 | Estonia | 98.52 | Ireland | 93 | Sweden | 1 | Latvia | 5.6 |
| 63 | Belarus | 4.95 | Thailand | 15.4 | Spain | 98.49 | Cote d'Ivoire | 94 | Tajikistan | 1 | Ecuador | 5.6 |
| 64 | Rwanda | 4.92 | Bulgaria | 15.3 | Maldives | 98.46 | Indonesia | 96 | Tonga | 1 | Gibraltar | 5.6 |
| 65 | Switzerland | 4.89 | Eswatini | 15.2 | Latvia | 98.45 | Greece | 98 | Turkmenistan | 1 | St Vin. & Gren, | 5.6 |
| 66 | South Korea | 4.87 | Morocco | 15.1 | Finland | 98.38 | Sweden | 96 | UK | 1 | Lithuania | 5.5 |
| 67 | Burundi | 4.82 | Serbia | 15.0 | Canada | 98.26 | Bulgaria | 99 | Uzbekistan | 1 | Brunei | 5.5 |
| 68 | Argentina | 4.81 | Israel | 14.9 | Poland | 98.25 | Austria | 101 | Albania | 2 | Tanzania | 5.5 |
| 69 | Czech | 4.80 | Slovakia | 14.9 | Guyana | 98.21 | Ethiopia | 99 | Algeria | 2 | Djibouti | 5.4 |
| 70 | Slovakia | 4.80 | Peru | 14.9 | Iran | 98.05 | Madagascar | 101 | Armenia | 2 | Singapore | 5.4 |
| 71 | Portugal | 4.78 | Ecuador | 14.9 | Serbia | 98.00 | Burundi | 103 | Azerbaijan | 2 | Turkmenistan | 5.4 |
| 72 | Austria | 4.77 | N. Macedonia | 14.8 | Somalia | 97.94 | Kuwait | 101 | Bangladesh | 2 | Aruba | 5.3 |
| 73 | Seychelles | 4.74 | Tunisia | 14.7 | Germany | 97.76 | Cyprus | 103 | Belarus | 2 | Israel | 5.3 |
| 74 | Bulgaria | 4.73 | Moldova | 14.6 | Egypt | 97.47 | Kenya | 103 | Bhutan | 2 | Montenegro | 5.3 |
| 75 | Luxembourg | 4.70 | San Marino | 14.6 | Hungary | 97.42 | Lesotho | 104 | Canada | 2 | Saudi Arabia | 5.2 |
| 76 | Kosovo | 4.70 | Mexico | 14.5 | New Caledonia | 97.36 | U.A.E. | 104 | Estonia | 2 | United States | 5.1 |
| 77 | Hungary | 4.68 | Albania | 14.5 | Slovenia | 97.25 | Belgium | 106 | Fiji | 2 | Armenia | 5.1 |
| 78 | Poland | 4.67 | Andorra | 14.5 | Tunisia | 97.17 | Italy | 106 | Finland | 2 | Serbia | 5.1 |
| 79 | Cape Verde | 4.67 | Luxembourg | 14.4 | Jordan | 97.17 | Tuvalu | 110 | Fr. Polynesia | 2 | Isle of Man | 5.1 |
| 80 | Montenegro | 4.66 | Armenia | 14.4 | Kosovo | 97.16 | Kyrgyzstan | 112 | Georgia | 2 | Iceland | 5.0 |
| 81 | Dominica | 4.66 | Colombia | 14.3 | Austria | 97.16 | Croatia | 115 | Ghana | 2 | Cuba | 5.0 |
| 82 | Latvia | 4.62 | Dominica | 14.2 | Italy | 97.15 | Kiribati | 113 | Iran | 2 | Grenada | 5.0 |
| 83 | Eritrea | 4.59 | Mauritius | 14.2 | Colombia | 97.12 | Portugal | 115 | Israel | 2 | Liechtenstein | 5.0 |
| 84 | Mauritius | 4.57 | Trin. & Tobago | 14.2 | Sierra Leone | 96.75 | South Korea | 115 | Kosovo | 2 | Monaco | 5.0 |
| 85 | Germany | 4.54 | Palau | 14.1 | Barbados | 96.74 | Egypt | 116 | Kyrgyzstan | 2 | Denmark | 4.9 |
| 86 | Uruguay | 4.51 | Romania | 14.1 | Ireland | 96.47 | France | 117 | Lebanon | 2 | Faroe Islands | 4.9 |
| 87 | Isle of Man | 4.47 | Kazakhstan | 14.0 | Palestinian Ter. | 96.35 | Spain | 117 | Montenegro | 2 | Bos. & Herz. | 4.8 |
| 88 | Kazakhstan | 4.46 | Paraguay | 14.0 | Azerbaijan | 96.23 | Cameroon | 118 | Morocco | 2 | Dominica | 4.7 |
| 89 | Guyana | 4.45 | Iran | 14.0 | Bolivia | 96.20 | Malta | 119 | Nepal | 2 | Brazil | 4.7 |
| 90 | Eq. Guinea | 4.44 | Cuba | 13.9 | Ant. & Barbuda | 96.20 | China | 119 | Sierra Leone | 2 | Estonia | 4.6 |
| 91 | Aruba | 4.44 | South Africa | 13.8 | Brunei | 96.19 | Hong Kong | 121 | Syria | 2 | Samoa | 4.6 |
| 92 | Brunei | 4.43 | Fiji | 13.8 | Sri Lanka | 96.18 | Guatemala | 123 | Andorra | 3 | Germany | 4.5 |
| 93 | Somalia | 4.41 | Nepal | 13.8 | San Marino | 96.12 | Estonia | 122 | Bolivia | 2 | Kuwait | 4.5 |
| 94 | Afghanistan | 4.34 | Belarus | 13.7 | Uzbekistan | 96.09 | Jamaica | 125 | India | 3 | Nicaragua | 4.5 |
| 95 | Spain | 4.32 | Brunei | 13.7 | South Korea | 96.05 | Micronesia | 127 | Kazakhstan | 3 | Fr. Polynesia | 4.4 |
| 96 | Belize | 4.26 | Dominican Rep. | 13.6 | Brazil | 96.04 | Romania | 129 | Kiribati | 3 | Guatemala | 4.4 |
| 97 | Lithuania | 4.25 | Mongolia | 13.6 | Fr. Polynesia | 95.97 | S. Tome & Prin | 129 | Latvia | 3 | Austria | 4.4 |
| 98 | Mexico | 4.25 | Oman | 13.4 | United States | 95.74 | Ukraine | 130 | Liberia | 3 | Canada | 4.4 |
| 99 | Fiji | 4.25 | Ukraine | 13.3 | Bulgaria | 95.71 | Zimbabwe | 133 | Libya | 3 | Slovakia | 4.4 |
| 100 | Peru | 4.24 | Panama | 13.3 | Malta | 95.52 | Sri Lanka | 134 | Lithuania | 3 | Mali | 4.4 |
| 101 | Italy | 4.22 | Timor Leste | 13.3 | Mongolia | 95.25 | Suriname | 134 | Mauritius | 3 | Japan | 4.3 |
| 102 | Oman | 4.20 | Comoros | 13.3 | Slovakia | 95.22 | Vietnam | 135 | Moldova | 3 | Czech | 4.2 |
| 103 | S. Maarten (D) | 4.18 | Indonesia | 13.3 | Albania | 95.14 | Zambia | 137 | Monaco | 3 | Romania | 4.2 |
| 104 | Canada | 4.14 | Bhutan | 13.2 | Switzerland | 95.06 | UK | 139 | New Caledonia | 3 | South Korea | 4.2 |
| 105 | Bos. & Herz. | 4.14 | Bos. & Herz. | 13.2 | Aruba | 95.02 | N. Macedonia | 140 | New Zealand | 3 | Dominican Rep. | 4.2 |
| 106 | India | 4.12 | Russia | 13.2 | Marshall Islands | 94.95 | Lebanon | 141 | Sri Lanka | 3 | Macau | 4.2 |
| 107 | Virgin Is. (US) | 4.11 | Turkmenistan | 13.2 | Tonga | 94.94 | Tajikistan | 141 | Turkey | 3 | Switzerland | 4.1 |
| 108 | Niger | 4.10 | Egypt | 13.1 | Israel | 94.91 | Brunei | 143 | Vietnam | 3 | Finland | 4.0 |
| 109 | Greece | 4.08 | Togo | 13.1 | Qatar | 94.65 | Benin | 144 | Afghanistan | 4 | Suriname | 4.0 |
| 110 | Croatia | 4.06 | Qatar | 13.1 | Isle of Man | 94.56 | Bhutan | 145 | Angola | 4 | New Caledonia | 3.9 |
| 111 | Russia | 4.05 | Jordan | 13.1 | Oman | 94.47 | Philippines | 149 | Cayman Islands | 4 | Croatia | 3.8 |
| 112 | Honduras | 4.05 | Sri Lanka | 13.1 | Haiti | 94.42 | Uganda | 154 | Chile | 4 | Poland | 3.8 |
| 113 | Barbados | 4.04 | Palestinian Ter. | 13.0 | Belize | 94.33 | Isle of Man | 153 | Cuba | 4 | South Africa | 3.8 |
| 114 | Mali | 4.04 | Guyana | 13.0 | Kuwait | 94.22 | Slovakia | 155 | Grenada | 4 | Mauritania | 3.7 |
| 115 | China | 4.02 | India | 13.0 | Cayman Islands | 94.17 | Lithuania | 156 | Guam | 4 | Uruguay | 3.7 |
| 116 | Norway | 3.97 | Venezuela | 13.0 | Seychelles | 94.05 | Botswana | 161 | Mozambique | 4 | Costa Rica | 3.7 |
| 117 | Kenya | 3.96 | S. Tome & Prin | 12.9 | India | 93.49 | Australia | 162 | Pakistan | 4 | UK | 3.7 |
| 118 | Dominican Rep. | 3.94 | Azerbaijan | 12.9 | N. Macedonia | 93.41 | Serbia | 162 | Philippines | 4 | Andorra | 3.7 |
| 119 | Grenada | 3.94 | Libya | 12.9 | Kyrgyzstan | 93.00 | Singapore | 164 | Rwanda | 4 | Eswatini | 3.7 |
| 120 | Egypt | 3.93 | Nauru | 12.8 | France | 92.93 | Laos | 166 | Tanzania | 4 | Greenland | 3.7 |
| 121 | Malawi | 3.92 | Maldives | 12.8 | Panama | 92.76 | Mongolia | 166 | Timor Leste | 4 | Qatar | 3.7 |
| 122 | U.A.E. | 3.89 | Philippines | 12.8 | Belarus | 92.62 | Montenegro | 170 | Ukraine | 4 | Sweden | 3.6 |
| 123 | Ecuador | 3.89 | Kyrgyzstan | 12.7 | Cuba | 92.61 | Albania | 172 | Yemen | 4 | El Salvador | 3.5 |
| 124 | New Caledonia | 3.84 | St Lucia | 12.7 | Armenia | 92.51 | Mexico | 175 | Argentina | 5 | Chile | 3.4 |
| 125 | Hong Kong | 3.80 | Malaysia | 12.7 | Tuvalu | 92.12 | Puerto Rico | 177 | Cambodia | 5 | Marshall Islands | 3.4 |
| 126 | Togo | 3.80 | Rep. of Congo | 12.7 | Ghana | 92.01 | Latvia | 175 | Cameroon | 5 | Paraguay | 3.4 |
| 127 | Nicaragua | 3.79 | Rwanda | 12.6 | South Africa | 91.54 | Iraq | 179 | Greenland | 5 | New Zealand | 3.3 |
| 128 | N. Macedonia | 3.76 | Uzbekistan | 12.5 | Timor Leste | 91.48 | Czech | 178 | Kenya | 5 | Norway | 3.3 |
| 129 | Djibouti | 3.75 | Eq. Guinea | 12.5 | Palau | 91.20 | Samoa | 179 | Liechtenstein | 5 | Panama | 3.3 |
| 130 | Mongolia | 3.74 | Gabon | 12.5 | Botswana | 90.96 | Ecuador | 181 | Marshall Islands | 5 | Venezuela | 3.3 |
| 131 | Georgia | 3.74 | Tuvalu | 12.4 | Togo | 90.70 | Myanmar | 183 | Niger | 5 | U.A.E. | 3.2 |
| 132 | Ethiopia | 3.74 | Iraq | 12.4 | Tajikistan | 90.25 | Kazakhstan | 184 | North Korea | 5 | Bulgaria | 3.2 |
| 133 | St Lucia | 3.70 | Samoa | 12.4 | Paraguay | 90.25 | Honduras | 188 | Seychelles | 5 | Australia | 3.1 |
| 134 | Nepal | 3.68 | Jamaica | 12.4 | Mauritius | 90.17 | Hungary | 192 | Solomon Islands | 5 | Botswana | 3.1 |
| 135 | Ant. & Barbuda | 3.65 | Bangladesh | 12.3 | Eswatini | 90.16 | Jordan | 185 | Tunisia | 5 | Cape Verde | 3.1 |
| 136 | St Kitts & Nevis | 3.63 | North Korea | 12.2 | Laos | 89.96 | New Zealand | 185 | Zambia | 5 | Greece | 2.9 |
| 137 | Malaysia | 3.63 | Angola | 12.2 | Cambodia | 89.88 | Poland | 193 | Br. Virgin Is. | 6 | Luxembourg | 2.9 |
| 138 | Philippines | 3.62 | Belize | 12.0 | St Lucia | 89.65 | Macau | 196 | Burundi | 6 | Netherlands | 2.9 |
| 139 | Puerto Rico | 3.60 | Cayman Islands | 12.0 | Macau | 89.52 | S. Maarten (D) | 196 | Cape Verde | 6 | Belgium | 2.8 |
| 140 | Azerbaijan | 3.58 | Kiribati | 11.9 | Bahrain | 89.37 | Tunisia | 196 | Malawi | 6 | St Lucia | 2.8 |
| 141 | Zambia | 3.58 | Bahamas | 11.9 | Ukraine | 89.29 | Venezuela | 199 | Mongolia | 6 | Argentina | 2.7 |
| 142 | Libya | 3.58 | Vanuatu | 11.8 | Dominica | 89.21 | Fr. Polynesia | 200 | Peru | 6 | Mexico | 2.6 |
| 143 | Colombia | 3.51 | Namibia | 11.8 | Liechtenstein | 88.94 | Bermuda | 200 | Samoa | 6 | Honduras | 2.6 |
| 144 | Am. Samoa | 3.45 | Lebanon | 11.7 | S. Tome & Prin | 87.97 | Colombia | 201 | Somalia | 6 | Rwanda | 2.6 |
| 145 | South Sudan | 3.44 | Uganda | 11.6 | Cape Verde | 87.52 | New Caledonia | 205 | Suriname | 6 | Am. Samoa | 2.6 |
| 146 | Palau | 3.44 | Micronesia | 11.5 | Micronesia | 86.80 | Mauritius | 206 | Zimbabwe | 6 | Slovenia | 2.5 |
| 147 | San Marino | 3.43 | Kenya | 11.5 | Guatemala | 86.43 | Saudi Arabia | 207 | Eritrea | 7 | Madagascar | 2.5 |
| 148 | Cote d'Ivoire | 3.43 | Nicaragua | 11.5 | Bos. & Herz. | 86.36 | Algeria | 217 | Iraq | 7 | Peru | 2.4 |
| 149 | Paraguay | 3.41 | Myanmar | 11.5 | Hong Kong | 86.30 | Israel | 217 | Laos | 7 | Colombia | 2.2 |
| 150 | Benin | 3.38 | Papua N. G. | 11.5 | Tanzania | 86.23 | Gabon | 226 | Russia | 7 | France | 2.2 |
| 151 | Panama | 3.37 | Botswana | 11.4 | Afghanistan | 86.18 | Iran | 228 | S. Tome & Prin | 7 | Malta | 2.2 |
| 152 | Romania | 3.32 | Cape Verde | 11.4 | Zimbabwe | 86.12 | Dominican Rep. | 231 | Sudan | 7 | Bolivia | 2.2 |
| 153 | Greenland | 3.30 | Cote d'Ivoire | 11.4 | Grenada | 85.58 | Bahrain | 234 | United States | 7 | Ireland | 1.9 |
| 154 | Syria | 3.27 | Ghana | 11.4 | Dominican Rep. | 85.04 | Moldova | 235 | Madagascar | 8 | Spain | 1.9 |
| 155 | Tanzania | 3.26 | Solomon Islands | 11.3 | Trin. & Tobago | 84.85 | Paraguay | 239 | Papua N. G. | 8 | Portugal | 1.8 |
| 156 | Serbia | 3.24 | Cambodia | 11.2 | Nigeria | 83.91 | Barbados | 240 | Paraguay | 8 | Timor Leste | 1.6 |
| 157 | Japan | 3.24 | El Salvador | 11.1 | Romania | 82.86 | Eswatini | 243 | Thailand | 8 | Italy | 1.6 |
| 158 | Fr. Polynesia | 3.23 | Zimbabwe | 11.1 | Gabon | 82.02 | Azerbaijan | 244 | Chad | 9 | Mozambique | 1.0 |
| 159 | Qatar | 3.23 | Lesotho | 11.0 | Comoros | 81.41 | Fiji | 248 | Ethiopia | 9 | Eq. Guinea | 0.8 |
| 160 | Guatemala | 3.18 | Zambia | 11.0 | El Salvador | 80.96 | Georgia | 249 | Gabon | 9 | Yemen | 0.6 |
| 161 | El Salvador | 3.17 | Suriname | 11.0 | Greenland | 80.74 | South Africa | 249 | Guinea | 9 | S. Tome & Prin | 0.4 |
| 162 | Jordan | 3.16 | Congo (DRC) | 10.9 | Philippines | 80.71 | Virgin Is. (US) | 251 | Uganda | 9 | Guinea-Bissau | 0.2 |
| 163 | Madagascar | 3.14 | Haiti | 10.9 | Nicaragua | 80.68 | Bolivia | 252 | Uruguay | 9 | Afghanistan | . |
| 164 | Turks & Caicos | 3.14 | Mozambique | 10.8 | Cote d'Ivoire | 80.23 | Malaysia | 256 | Djibouti | 10 | Angola | . |
| 165 | Ireland | 3.01 | Tajikistan | 10.8 | Jamaica | 79.48 | Cambodia | 257 | Gambia | 10 | Benin | . |
| 166 | Congo (DRC) | 3.00 | Afghanistan | 10.8 | Faroe Islands | 79.40 | Curacao | 261 | Rep. of Congo | 10 | Bhutan | . |
| 167 | Timor Leste | 2.97 | Cameroon | 10.8 | Bhutan | 78.29 | Morocco | 267 | Togo | 10 | Burkina Faso | . |
| 168 | Rep. of Congo | 2.95 | Guatemala | 10.7 | Luxembourg | 77.84 | Argentina | 268 | Barbados | 11 | Burundi | . |
| 169 | Cambodia | 2.95 | Guinea-Bissau | 10.6 | Congo (DRC) | 76.96 | Libya | 269 | Bermuda | 11 | C. African Rep. | . |
| 170 | Iran | 2.93 | Liberia | 10.5 | Suriname | 76.87 | Peru | 286 | Botswana | 11 | Cambodia | . |
| 171 | Ghana | 2.91 | Nigeria | 10.5 | Bahamas | 76.50 | Trin. & Tobago | 276 | Costa Rica | 11 | Cameroon | . |
| 172 | Vietnam | 2.89 | Benin | 10.4 | Honduras | 75.75 | Greenland | 271 | Dominican Rep. | 11 | Chad | . |
| 173 | Trin. & Tobago | 2.88 | Guinea | 10.4 | Gambia | 75.56 | Gibraltar | 273 | Mali | 11 | Congo (DRC) | . |
| 174 | Suriname | 2.87 | Honduras | 10.2 | Br. Virgin Is. | 74.24 | Aruba | 288 | Nicaragua | 11 | Cote d'Ivoire | . |
| 175 | Bahamas | 2.84 | Malawi | 9.9 | Papua N. G. | 73.66 | Guyana | 288 | Palau | 11 | Curacao | . |
| 176 | Turkmenistan | 2.75 | Burundi | 9.8 | Rep. of Congo | 71.83 | St Kitts & Nevis | 296 | Namibia | 12 | Eritrea | . |
| 177 | Albania | 2.74 | Laos | 9.6 | Solomon Islands | 71.57 | Russia | 300 | Eswatini | 13 | Gabon | . |
| 178 | Guinea-Bissau | 2.71 | Ethiopia | 9.2 | Lesotho | 71.13 | Cayman Islands | 304 | Haiti | 13 | Gambia | . |
| 179 | Gambia | 2.70 | Sierra Leone | 9.1 | Cameroon | 71.08 | N. Mariana Is. | 304 | Haiti Panama | 13 | Ghana | . |
| 180 | Mauritania | 2.65 | Senegal | 9.1 | Andorra | 69.33 | St Lucia | 308 | Congo (DRC) | 14 | Guinea | . |
| 181 | Cameroon | 2.62 | Madagascar | 9.1 | Puerto Rico | 69.15 | Chile | 311 | Dominica | 14 | Haiti | . |
| 182 | Turkey | 2.61 | Gambia | 9.0 | Malawi | 68.47 | Belize | 312 | Ecuador | 14 | India | . |
| 183 | Uganda | 2.55 | Burkina Faso | 8.7 | Lebanon | 68.27 | Maldives | 314 | Ecuador South Sudan | 14 | Iran | . |
| 184 | Chad | 2.54 | Sudan | 8.6 | Pakistan | 68.10 | Namibia | 318 | Guyana | 16 | Kenya | . |
| 185 | Thailand | 2.52 | Tanzania | 8.6 | Sudan | 66.57 | Nicaragua | 332 | Puerto Rico | 17 | Laos | . |
| 186 | Br. Virgin Is. | 2.48 | Niger | 8.3 | Mauritania | 66.28 | Grenada | 338 | Ant. & Barbuda | 17 | Lesotho | . |
| 187 | Venezuela | 2.45 | Chad | 8.3 | Yemen | 65.54 | Belarus | 345 | El Salvador | 18 | Liberia | . |
| 188 | Comoros | 2.43 | Mauritania | 7.9 | Djibouti | 64.81 | Costa Rica | 345 | Curacao | 19 | Malawi | . |
| 189 | Angola | 2.33 | Pakistan | 7.9 | Benin | 64.57 | Nauru | 345 | Eq. Guinea | 19 | Malaysia | . |
| 190 | Liberia | 2.28 | Yemen | 7.5 | Guinea | 63.18 | Dominica | 356 | Venezuela | 19 | Micronesia | . |
| 191 | Gabon | 2.21 | Somalia | 7.5 | Belgium | 62.42 | St Vin. & Gren, | 361 | C. African Rep. | 20 | Morocco | . |
| 192 | Gibraltar | 2.20 | Syria | 7.4 | Syria | 61.86 | Palau | 367 | Guatemala | 20 | Myanmar | . |
| 193 | Singapore | 2.19 | C. African Rep. | 7.4 | Senegal | 61.28 | Br. Virgin Is. | 368 | Virgin Is. (US) | 21 | Namibia | . |
| 194 | C. African Rep. | 2.12 | Eritrea | 7.3 | Angola | 61.03 | Thailand | 391 | Brazil | 22 | Nepal | . |
| 195 | Zimbabwe | 2.05 | Mali | 7.0 | Zambia | 60.55 | Seychelles | 393 | Nigeria | 22 | Niger | . |
| 196 | Myanmar | 2.00 | Djibouti | 6.2 | Madagascar | 60.40 | Ant. & Barbuda | 400 | Colombia | 27 | Nigeria | . |
| 197 | Bahrain | 1.99 | South Sudan | 5.6 | Rwanda | 59.30 | Brazil | 408 | Mexico | 28 | Oman | . |
| 198 | Guinea | 1.99 | Am. Samoa | . | N. Mariana Is. | 58.18 | Turkey | 443 | Myanmar | 28 | Pakistan | . |
| 199 | Bermuda | 1.93 | Aruba | . | Liberia | 58.17 | Uruguay | 449 | St Martin (Fr) | 29 | Palau | . |
| 200 | Andorra | 1.93 | Bermuda | . | Mozambique | 57.57 | Cape Verde | 467 | Lesotho | 29 | Papua N. G. | . |
| 201 | Pakistan | 1.87 | Br. Virgin Is. | . | Eritrea | 56.67 | Bahamas | 482 | Bahamas | 29 | Rep. of Congo | . |
| 202 | Sri Lanka | 1.83 | Channel Islands | . | Ethiopia | 55.90 | Guam | 513 | Trin. & Tobago | 29 | S. Maarten (D) | . |
| 203 | Bangladesh | 1.78 | Curacao | . | Iraq | 54.49 | Tonga | 516 | St Kitts & Nevis | 29 | Senegal | . |
| 204 | Lebanon | 1.67 | Faroe Islands | . | Uganda | 52.97 | Panama | 522 | St Vin. & Gren, | 31 | Sierra Leone | . |
| 205 | Cayman Islands | 1.49 | Fr. Polynesia | . | Burkina Faso | 51.73 | Am. Samoa | 538 | Belize | 31 | Solomon Islands | . |
| 206 | Papua N. G. | 1.35 | Gibraltar | . | Mali | 49.71 | United States | 541 | Honduras | 38 | Somalia | . |
| 207 | Indonesia | 1.28 | Greenland | . | Burundi | 49.20 | Turkmenistan | 576 | St Lucia | 39 | South Sudan | . |
| 208 | Haiti | 1.27 | Guam | . | C. African Rep. | 48.73 | Rwanda | 620 | South Africa | 42 | Sri Lanka | . |
| 209 | Laos | 1.23 | Isle of Man | . | Niger | 47.90 | Cuba | 794 | Jamaica | 52 | St Martin (Fr) | . |
| 210 | Monaco | 1.17 | Macau | . | Chad | 43.53 | El Salvador | 1659 | Channel Islands | . | Sudan | . |
| 211 | Nigeria | 0.35 | N. Mariana Is. | . | Eq. Guinea | 39.06 | Channel Islands | . | Comoros | . | Thailand | . |
| 212 | Armenia | 0.24 | New Caledonia | . | Guinea-Bissau | 27.49 | Eritrea | . | Cote d'Ivoire | . | Togo | . |
| 213 | Channel Islands | . | Puerto Rico | . | South Sudan | 20.55 | Kosovo | . | Faroe Islands | . | Tuvalu | . |
| 214 | Curacao | . | S. Maarten (D) | . | Am. Samoa | . | North Korea | . | Gibraltar | . | Uganda | . |
| 215 | Faroe Islands | . | St Martin (Fr) | . | Curacao | . | Palestinian Ter. | . | N. Mariana Is. | . | Vanuatu | . |
| 216 | Guam | . | Turks & Caicos | . | Guam | . | St Martin (Fr) | . | Nauru | . | Zambia | . |
| 217 | Liechtenstein | . | Virgin Is. (US) | . | Virgin Is. (US) | . | Turks & Caicos | . | S. Maarten (D) | . | Zimbabwe | . |

## Supplementary Table 6 (cont.). Objective Indicators – Global Countries Ranked

| Rank | Society | | Industry/Infrastructure | | | | | | Overall Index | | |  |
| --- | --- | --- | --- | --- | --- | --- | --- | --- | --- | --- | --- | --- |
| **Corruption Perception Index**  *higher score = better*  *higher rank = better* | | **Sustainable Competitiveness Index**  *higher score = better*  *higher rank = better* | | **Quality Infrastructure Index**  *higher score = better*  *higher rank = better* | | **Mobile Cellular Subscriptions**  Per 100 people  *higher score = better*  *higher rank = better* | | **Overall Index (/30)**  *higher score = worse*  *higher rank = better* | | **Overall Index (/7)**  *higher score = worse*  *higher rank = better* | |
| 1 | Denmark | 90 | Sweden | 39.79 | China | 93.88 | Hong Kong | 291.91 | Iceland | 39.79 | Faroe Islands | 11.00 |
| 2 | Finland | 88 | Finland | 53.87 | France | 89.29 | U.A.E. | 212.22 | Denmark | 53.87 | Iceland | 18.14 |
| 3 | Singapore | 84 | Denmark | 54.73 | Germany | 84.96 | Libya | 204.63 | Australia | 54.73 | Monaco | 18.67 |
| 4 | New Zealand | 83 | Switzerland | 55.63 | United States | 84.83 | Montenegro | 203.17 | Norway | 55.63 | Liechtenstein | 20.40 |
| 5 | Switzerland | 81 | Norway | 56.27 | UK | 81.76 | Ant. & Barbuda | 197.38 | Ireland | 56.27 | Norway | 23.71 |
| 6 | Norway | 81 | Austria | 56.77 | Japan | 80.71 | Seychelles | 191.51 | Switzerland | 56.73 | Japan | 28.71 |
| 7 | Luxembourg | 81 | France | 57.97 | South Korea | 79.45 | El Salvador | 181.63 | Sweden | 57.90 | Ireland | 29.43 |
| 8 | Sweden | 80 | Estonia | 58.37 | Italy | 77.76 | Kuwait | 181.00 | New Zealand | 58.37 | Switzerland | 29.71 |
| 9 | Netherlands | 78 | Germany | 58.6 | India | 75.04 | Thailand | 176.32 | Netherlands | 58.63 | Netherlands | 31.14 |
| 10 | Iceland | 77 | Japan | 60.87 | Australia | 74.54 | Macau | 174.52 | Japan | 60.87 | Germany | 36.00 |
| 11 | Australia | 77 | Ireland | 61.17 | Netherlands | 73.98 | Qatar | 174.13 | Finland | 61.17 | Australia | 37.00 |
| 12 | Ireland | 77 | Luxembourg | 63.67 | Spain | 73.51 | Cote d'Ivoire | 174.03 | Canada | 63.67 | Denmark | 37.71 |
| 13 | Estonia | 76 | Portugal | 64.47 | Canada | 71.01 | Russia | 168.98 | UK | 64.47 | Finland | 37.71 |
| 14 | Uruguay | 76 | UK | 65.47 | Turkey | 70.62 | Japan | 167.52 | Germany | 65.47 | Andorra | 39.33 |
| 15 | Germany | 75 | Slovenia | 65.47 | Switzerland | 68.87 | South Africa | 167.40 | Austria | 65.53 | Sweden | 40.57 |
| 16 | Canada | 75 | South Korea | 66.38 | Czech | 67.90 | Botswana | 165.30 | Malta | 66.34 | New Zealand | 43.29 |
| 17 | Hong Kong | 74 | Poland | 66.47 | Brazil | 67.08 | Iran | 164.50 | Czech | 66.47 | Isle of Man | 43.50 |
| 18 | Seychelles | 72 | Iceland | 67.2 | South Africa | 65.60 | Mauritius | 161.36 | Israel | 67.23 | Luxembourg | 45.43 |
| 19 | Bhutan | 72 | Netherlands | 67.27 | Slovakia | 64.18 | Singapore | 156.48 | Slovenia | 67.27 | UK | 45.43 |
| 20 | Japan | 71 | Belgium | 68.4 | Saudi Arabia | 64.16 | Panama | 156.31 | U.A.E. | 68.40 | Malta | 45.71 |
| 21 | UK | 71 | Italy | 68.57 | Mexico | 63.86 | Georgia | 156.09 | Belgium | 68.57 | Belgium | 45.86 |
| 22 | Belgium | 69 | Latvia | 68.65 | U.A.E. | 63.76 | Colombia | 155.79 | Luxembourg | 68.66 | San Marino | 47.83 |
| 23 | Barbados | 68 | Canada | 71.63 | Portugal | 62.06 | Estonia | 155.03 | South Korea | 71.63 | Canada | 48.00 |
| 24 | U.A.E. | 68 | Lithuania | 71.63 | Singapore | 61.96 | Israel | 152.22 | Cyprus | 71.63 | South Korea | 49.00 |
| 25 | Austria | 67 | Australia | 73.5 | Poland | 61.85 | Costa Rica | 152.03 | France | 73.50 | Austria | 49.14 |
| 26 | France | 67 | Czech | 73.86 | Finland | 61.27 | Suriname | 150.29 | Singapore | 73.93 | Slovenia | 49.29 |
| 27 | Bahamas | 65 | New Zealand | 74.1 | Denmark | 61.25 | Cyprus | 148.74 | Kazakhstan | 74.13 | Singapore | 52.57 |
| 28 | United States | 65 | Macau | 74.93 | Indonesia | 60.70 | South Korea | 148.59 | Portugal | 74.93 | Hong Kong | 53.57 |
| 29 | Israel | 64 | China | 75.45 | Austria | 60.48 | Cayman Islands | 146.77 | Oman | 75.45 | Portugal | 54.14 |
| 30 | South Korea | 64 | Slovakia | 75.63 | Russia | 60.24 | Bahrain | 145.44 | Estonia | 75.63 | France | 54.71 |
| 31 | St Vin. & Gren, | 63 | Croatia | 75.93 | Belgium | 60.10 | Philippines | 144.04 | Spain | 76.00 | Czech | 55.14 |
| 32 | Lithuania | 63 | Spain | 80.53 | Thailand | 59.96 | Sri Lanka | 143.08 | Liechtenstein | 76.05 | Spain | 56.29 |
| 33 | Chile | 63 | Uruguay | 80.67 | Norway | 59.67 | Mongolia | 142.29 | Monaco | 77.40 | Italy | 58.29 |
| 34 | Cape Verde | 62 | Bulgaria | 81.37 | Sweden | 58.29 | Andorra | 142.21 | Slovakia | 80.53 | Greece | 59.29 |
| 35 | Dominica | 60 | Greece | 81.7 | Romania | 56.69 | Malaysia | 141.29 | Lithuania | 80.67 | Cyprus | 60.57 |
| 36 | Slovenia | 60 | United States | 81.83 | Colombia | 55.40 | Vietnam | 139.95 | United States | 81.37 | Channel Islands | 60.67 |
| 37 | Latvia | 59 | Liechtenstein | 81.9 | Hungary | 53.35 | Lithuania | 139.14 | San Marino | 81.55 | Macau | 62.40 |
| 38 | Saudi Arabia | 59 | Singapore | 82.1 | Ukraine | 51.90 | Uruguay | 138.53 | Saudi Arabia | 81.70 | Bermuda | 62.60 |
| 39 | Qatar | 59 | Greenland | 82.81 | Malaysia | 51.68 | Morocco | 137.46 | Malaysia | 81.83 | Estonia | 63.14 |
| 40 | St Lucia | 59 | Vietnam | 83.03 | Greece | 51.27 | Luxembourg | 137.08 | Costa Rica | 81.90 | Puerto Rico | 63.60 |
| 41 | Costa Rica | 58 | Hungary | 83.07 | Tunisia | 51.27 | Maldives | 136.54 | Seychelles | 82.74 | Poland | 64.29 |
| 42 | Botswana | 57 | Costa Rica | 83.19 | Vietnam | 51.22 | Armenia | 135.25 | Poland | 82.97 | Israel | 64.43 |
| 43 | Rwanda | 57 | Romania | 83.27 | Serbia | 50.23 | Oman | 135.08 | Italy | 83.07 | United States | 65.43 |
| 44 | Portugal | 57 | Israel | 83.37 | Iran | 50.00 | Ukraine | 135.03 | Hong Kong | 83.21 | Qatar | 66.86 |
| 45 | Cyprus | 56 | Albania | 83.7 | Slovenia | 49.86 | Chile | 134.75 | Georgia | 83.27 | Kuwait | 68.57 |
| 46 | Grenada | 56 | Cyprus | 84.03 | Latvia | 49.69 | Italy | 132.97 | Argentina | 83.37 | U.A.E. | 70.57 |
| 47 | Czech | 56 | Malta | 84.87 | Belarus | 49.17 | Palau | 132.93 | Montenegro | 83.70 | Croatia | 70.86 |
| 48 | Spain | 56 | Argentina | 84.97 | Kenya | 48.62 | Saudi Arabia | 132.38 | Kuwait | 84.03 | Gibraltar | 73.67 |
| 49 | Fiji | 55 | Ukraine | 85.07 | Bulgaria | 46.99 | Argentina | 132.36 | Hungary | 84.87 | Bulgaria | 73.86 |
| 50 | Oman | 55 | Chile | 86.03 | Argentina | 46.80 | Aruba | 132.35 | Croatia | 84.97 | Lithuania | 75.00 |
| 51 | Italy | 54 | Serbia | 86.93 | Pakistan | 46.69 | Poland | 131.94 | Chile | 85.07 | Slovakia | 75.86 |
| 52 | Bahrain | 53 | Peru | 87.04 | Ireland | 46.32 | Slovakia | 131.93 | Faroe Islands | 85.27 | Latvia | 77.29 |
| 53 | Georgia | 53 | Turkey | 87.6 | New Zealand | 45.97 | Malta | 131.59 | Latvia | 86.03 | Costa Rica | 78.29 |
| 54 | Poland | 53 | Brazil | 87.67 | Kazakhstan | 45.83 | Trin. & Tobago | 130.57 | Qatar | 86.90 | Brunei | 78.50 |
| 55 | Mauritius | 51 | Russia | 88.79 | Ecuador | 45.75 | Kazakhstan | 130.42 | Kyrgyzstan | 87.67 | Hungary | 79.00 |
| 56 | Malaysia | 50 | Malaysia | 89.81 | Hong Kong | 45.44 | Kyrgyzstan | 130.38 | Vanuatu | 88.75 | St Martin (Fr) | 80.33 |
| 57 | Vanuatu | 50 | Bos. & Herz. | 90.13 | Egypt | 44.70 | Tunisia | 129.26 | Maldives | 89.81 | Uruguay | 81.86 |
| 58 | Jordan | 49 | Bhutan | 90.37 | Peru | 44.62 | Finland | 128.68 | Mauritius | 90.13 | Barbados | 82.00 |
| 59 | Slovakia | 49 | Moldova | 90.43 | Albania | 44.55 | Czech | 128.41 | Greece | 90.37 | Seychelles | 82.67 |
| 60 | Greece | 49 | St Vin. & Gren, | 90.6 | Oman | 43.81 | Paraguay | 127.70 | Uruguay | 90.43 | Argentina | 83.00 |
| 61 | Namibia | 49 | Georgia | 90.8 | Georgia | 43.59 | Moldova | 127.42 | Mongolia | 90.57 | Trin. & Tobago | 85.00 |
| 62 | Armenia | 47 | Colombia | 90.86 | Botswana | 43.52 | Nepal | 127.23 | Panama | 90.80 | Oman | 85.57 |
| 63 | Croatia | 47 | Thailand | 91.04 | Tanzania | 43.26 | Denmark | 126.55 | Fiji | 90.86 | Fr. Polynesia | 85.83 |
| 64 | Montenegro | 46 | Belarus | 91.68 | Sri Lanka | 42.38 | Liechtenstein | 126.28 | Barbados | 91.00 | Virgin Is. (US) | 86.20 |
| 65 | Kuwait | 46 | Andorra | 91.97 | Ethiopia | 40.42 | Slovenia | 126.18 | Moldova | 91.97 | Romania | 86.86 |
| 66 | Romania | 46 | Ecuador | 92.67 | Chile | 39.71 | Guinea-Bissau | 125.93 | Andorra | 92.05 | Bahrain | 87.00 |
| 67 | Malta | 46 | Paraguay | 92.7 | Jordan | 38.26 | Gabon | 125.39 | Macau | 92.39 | Cayman Islands | 88.00 |
| 68 | S. Tome & Prin | 45 | Panama | 93.25 | Philippines | 37.63 | Germany | 125.23 | Bulgaria | 92.67 | Chile | 88.00 |
| 69 | Benin | 45 | Philippines | 94.04 | Costa Rica | 37.25 | Sweden | 125.07 | Uzbekistan | 92.70 | Ecuador | 88.86 |
| 70 | Cote d'Ivoire | 45 | Montenegro | 94.7 | Seychelles | 37.13 | China | 124.88 | Cote d'Ivoire | 93.25 | Mexico | 90.00 |
| 71 | Senegal | 45 | Kazakhstan | 95.44 | Burkina Faso | 36.87 | Portugal | 124.55 | Bahrain | 94.04 | S. Maarten (D) | 90.33 |
| 72 | Kosovo | 44 | U.A.E. | 95.58 | Israel | 36.69 | Spain | 124.10 | Egypt | 94.70 | Jamaica | 90.57 |
| 73 | Jamaica | 44 | Fiji | 95.87 | Zambia | 36.40 | Serbia | 123.72 | Ant. & Barbuda | 95.44 | St Kitts & Nevis | 91.80 |
| 74 | Timor Leste | 44 | Indonesia | 95.91 | Mozambique | 36.33 | Belarus | 123.45 | Kiribati | 95.58 | Tonga | 92.67 |
| 75 | China | 43 | Barbados | 96.28 | Bos. & Herz. | 36.19 | Austria | 123.43 | Peru | 95.87 | Saudi Arabia | 92.86 |
| 76 | Moldova | 43 | Timor Leste | 96.79 | Croatia | 36.08 | Iceland | 122.52 | Bhutan | 96.28 | Ant. & Barbuda | 93.00 |
| 77 | Belize | 43 | Armenia | 96.84 | Lithuania | 36.05 | Eswatini | 122.17 | Guam | 96.71 | Thailand | 93.29 |
| 78 | Bulgaria | 43 | Bolivia | 96.93 | Yemen | 35.75 | Peru | 122.03 | Senegal | 96.79 | Moldova | 94.43 |
| 79 | Solomon Islands | 43 | Cambodia | 97.21 | Congo (DRC) | 34.63 | San Marino | 121.81 | Tonga | 96.84 | Marshall Islands | 94.67 |
| 80 | Albania | 42 | N. Macedonia | 97.23 | N. Macedonia | 34.04 | Kenya | 121.67 | Vietnam | 96.93 | Mauritius | 94.86 |
| 81 | Ghana | 42 | Vanuatu | 97.6 | Mongolia | 34.00 | Br. Virgin Is. | 120.95 | Samoa | 97.21 | Panama | 94.86 |
| 82 | Hungary | 41 | Mongolia | 97.77 | Eswatini | 33.77 | UK | 120.82 | Algeria | 97.27 | Turks & Caicos | 95.00 |
| 83 | Trin. & Tobago | 41 | El Salvador | 97.95 | Uruguay | 33.47 | Senegal | 120.43 | Indonesia | 97.60 | Albania | 96.14 |
| 84 | Tanzania | 41 | Mexico | 98 | Qatar | 33.45 | Puerto Rico | 119.79 | Romania | 97.77 | Timor Leste | 96.29 |
| 85 | Cuba | 41 | Nepal | 98.16 | Cote d'Ivoire | 32.77 | Ghana | 119.62 | Botswana | 97.97 | Br. Virgin Is. | 98.25 |
| 86 | South Africa | 41 | Kenya | 99 | Luxembourg | 32.62 | Switzerland | 119.56 | Brunei | 98.12 | N. Mariana Is. | 99.00 |
| 87 | Burkina Faso | 41 | Maldives | 99.48 | Kuwait | 32.55 | St Kitts & Nevis | 119.11 | Belarus | 99.00 | Maldives | 99.33 |
| 88 | Vietnam | 40 | Seychelles | 99.5 | Moldova | 32.37 | France | 118.85 | Nauru | 99.00 | Philippines | 99.43 |
| 89 | Kazakhstan | 40 | Sri Lanka | 99.53 | Namibia | 32.34 | Tajikistan | 118.81 | Gibraltar | 99.47 | Malaysia | 99.71 |
| 90 | N. Macedonia | 40 | Guyana | 99.63 | Bahrain | 32.10 | Greenland | 118.42 | Timor Leste | 99.48 | China | 100.14 |
| 91 | Suriname | 40 | Sierra Leone | 99.93 | Lesotho | 31.70 | Romania | 118.11 | Serbia | 99.53 | Peru | 100.14 |
| 92 | Tunisia | 39 | India | 100 | Guatemala | 31.51 | Netherlands | 118.07 | Armenia | 99.53 | Bhutan | 100.29 |
| 93 | Guyana | 39 | Ant. & Barbuda | 100.33 | Dominican Rep. | 31.40 | Bos. & Herz. | 117.89 | Ukraine | 99.63 | Papua N. G. | 100.43 |
| 94 | Colombia | 39 | Mauritius | 100.47 | Cyprus | 31.27 | Brunei | 117.76 | S. Maarten (D) | 99.73 | Montenegro | 100.57 |
| 95 | Zambia | 39 | S. Tome & Prin | 100.53 | Uzbekistan | 30.17 | Bulgaria | 117.43 | Albania | 100.00 | Serbia | 100.57 |
| 96 | Maldives | 38 | Suriname | 101.5 | Zimbabwe | 29.43 | Latvia | 117.10 | Sierra Leone | 100.03 | Colombia | 101.57 |
| 97 | Gambia | 38 | Dominican Rep. | 102 | Uganda | 28.77 | Cambodia | 116.33 | Isle of Man | 100.13 | Dominican Rep. | 101.57 |
| 98 | India | 38 | Venezuela | 102.07 | Malawi | 28.56 | Guatemala | 115.18 | Kosovo | 100.14 | Kosovo | 101.80 |
| 99 | Ethiopia | 37 | Kosovo | 102.65 | Benin | 27.82 | Indonesia | 114.90 | Jordan | 100.33 | Russia | 101.86 |
| 100 | Indonesia | 37 | Namibia | 102.65 | Ghana | 27.45 | Barbados | 114.86 | Tuvalu | 100.48 | Solomon Islands | 102.00 |
| 101 | Argentina | 37 | Brunei | 102.7 | Montenegro | 27.10 | New Zealand | 114.69 | Ecuador | 101.37 | Vietnam | 102.29 |
| 102 | Lesotho | 37 | Ghana | 102.9 | Rwanda | 27.04 | Mali | 114.50 | Bolivia | 101.53 | Sri Lanka | 102.43 |
| 103 | Morocco | 37 | Belize | 102.97 | Mauritius | 27.03 | Ireland | 113.28 | Trin. & Tobago | 102.00 | Turkey | 103.71 |
| 104 | Dominican Rep. | 36 | Cuba | 103.03 | Madagascar | 26.89 | Namibia | 113.20 | Ghana | 102.07 | Indonesia | 103.86 |
| 105 | Ukraine | 35 | Saudi Arabia | 103.07 | Togo | 26.75 | Mauritania | 113.12 | Kenya | 102.66 | Kazakhstan | 103.86 |
| 106 | Serbia | 35 | Morocco | 103.1 | Mali | 26.65 | Gibraltar | 112.43 | Namibia | 102.66 | Brazil | 104.00 |
| 107 | Algeria | 34 | Kyrgyzstan | 103.34 | Senegal | 26.51 | Faroe Islands | 111.96 | China | 102.70 | Bolivia | 104.43 |
| 108 | Turkey | 34 | Senegal | 103.53 | El Salvador | 26.14 | Burkina Faso | 111.66 | Tunisia | 102.90 | Armenia | 104.57 |
| 109 | Brazil | 34 | Guatemala | 103.6 | Barbados | 25.57 | Croatia | 111.17 | Tanzania | 102.97 | New Caledonia | 105.25 |
| 110 | Malawi | 34 | Solomon Islands | 104.04 | Trin. & Tobago | 24.93 | Norway | 110.68 | Colombia | 103.03 | Grenada | 105.33 |
| 111 | Nepal | 34 | Kiribati | 104.37 | Angola | 24.85 | Timor Leste | 110.42 | South Africa | 103.10 | Cuba | 105.43 |
| 112 | Niger | 34 | Honduras | 104.45 | Estonia | 24.69 | United States | 110.17 | Thailand | 103.31 | Curacao | 106.00 |
| 113 | Thailand | 34 | Tuvalu | 104.73 | Morocco | 24.32 | Algeria | 109.17 | St Martin (Fr) | 103.50 | India | 106.00 |
| 114 | Mongolia | 33 | St Kitts & Nevis | 104.93 | Algeria | 24.00 | Greece | 109.06 | Philippines | 103.53 | Fiji | 106.43 |
| 115 | Belarus | 33 | Tonga | 105 | Niger | 23.91 | Benin | 108.97 | Mexico | 103.53 | Ukraine | 107.57 |
| 116 | Philippines | 33 | Tunisia | 105.07 | Bangladesh | 23.89 | Fiji | 107.23 | N. Macedonia | 103.60 | Bahamas | 108.00 |
| 117 | Bos. & Herz. | 33 | Congo (DRC) | 105.12 | Azerbaijan | 23.88 | Australia | 107.03 | Solomon Islands | 104.04 | Palau | 108.33 |
| 118 | Panama | 33 | Bangladesh | 105.27 | Mauritania | 23.67 | Fr. Polynesia | 106.98 | Palestinian Ter. | 104.04 | Vanuatu | 108.67 |
| 119 | Laos | 33 | Jamaica | 105.36 | Cuba | 23.32 | Azerbaijan | 106.85 | Cayman Islands | 104.37 | Guam | 108.75 |
| 120 | Sierra Leone | 33 | Gabon | 105.65 | Cambodia | 22.01 | Monaco | 106.82 | Jamaica | 104.73 | Georgia | 108.86 |
| 121 | Uzbekistan | 32 | Uzbekistan | 105.68 | Sierra Leone | 21.66 | Myanmar | 106.70 | Guyana | 104.97 | Guatemala | 109.00 |
| 122 | Ecuador | 32 | Botswana | 105.92 | Afghanistan | 21.60 | Guyana | 106.39 | Bos. & Herz. | 105.00 | Suriname | 109.57 |
| 123 | Angola | 32 | Benin | 106.1 | Gambia | 21.58 | Jamaica | 106.20 | Turkey | 105.10 | Bos. & Herz. | 110.14 |
| 124 | Kenya | 32 | Rwanda | 106.36 | Palestinian Ter. | 21.36 | Bermuda | 105.94 | Zambia | 105.28 | Bangladesh | 110.57 |
| 125 | Sri Lanka | 32 | Tanzania | 106.37 | Malta | 21.29 | Turkey | 105.81 | Turkmenistan | 105.36 | N. Macedonia | 111.14 |
| 126 | Togo | 32 | Palau | 106.38 | Guinea-Bissau | 20.74 | Bangladesh | 105.26 | N. Mariana Is. | 105.43 | Liberia | 111.29 |
| 127 | Djibouti | 31 | Myanmar | 106.67 | Papua N. G. | 20.50 | Hungary | 104.06 | St Vin. & Gren, | 105.92 | Paraguay | 112.29 |
| 128 | Peru | 31 | Samoa | 106.75 | Jamaica | 19.32 | Uzbekistan | 103.07 | Benin | 106.10 | Greenland | 112.33 |
| 129 | Papua N. G. | 31 | Grenada | 107.03 | Ant. & Barbuda | 19.30 | Guinea | 101.94 | Iran | 106.32 | Lebanon | 112.86 |
| 130 | Egypt | 30 | Nicaragua | 107.33 | Chad | 18.91 | Belgium | 101.87 | Brazil | 106.33 | Mongolia | 113.00 |
| 131 | Mauritania | 30 | Trin. & Tobago | 107.37 | Panama | 17.23 | Nigeria | 101.69 | Morocco | 106.41 | Tuvalu | 113.40 |
| 132 | El Salvador | 30 | Dominica | 107.52 | Paraguay | 16.82 | Gambia | 101.44 | Dominican Rep. | 106.70 | Aruba | 114.00 |
| 133 | Bolivia | 28 | Cote d'Ivoire | 107.57 | St Vin. & Gren, | 15.55 | St Vin. & Gren, | 100.46 | Suriname | 106.75 | Comoros | 114.14 |
| 134 | Guinea | 28 | Jordan | 108.08 | Kyrgyzstan | 15.26 | Mexico | 100.29 | Tajikistan | 107.03 | Ghana | 115.43 |
| 135 | Mali | 27 | Togo | 108.4 | Brunei | 14.84 | Comoros | 100.24 | Russia | 107.37 | Kyrgyzstan | 115.43 |
| 136 | Eswatini | 27 | Liberia | 108.6 | Nigeria | 14.82 | Bolivia | 99.62 | Marshall Islands | 107.38 | Samoa | 115.50 |
| 137 | Gabon | 27 | Zambia | 108.67 | Nepal | 14.40 | Cape Verde | 99.23 | Libya | 107.52 | St Lucia | 115.50 |
| 138 | Liberia | 27 | Cameroon | 110.17 | Iraq | 14.14 | Zambia | 99.10 | Paraguay | 107.57 | Algeria | 115.71 |
| 139 | Pakistan | 27 | Ethiopia | 110.86 | Belize | 13.08 | Brazil | 98.89 | Fr. Polynesia | 108.55 | Senegal | 119.14 |
| 140 | Iraq | 26 | Qatar | 110.96 | Nicaragua | 12.70 | Turkmenistan | 98.63 | Bangladesh | 108.60 | Belarus | 119.71 |
| 141 | Mexico | 26 | South Africa | 111.39 | Honduras | 11.84 | Bahamas | 98.54 | Turks & Caicos | 109.14 | Malawi | 119.71 |
| 142 | Madagascar | 26 | St Lucia | 111.73 | Gabon | 11.37 | Iraq | 98.18 | Liberia | 109.44 | Togo | 120.43 |
| 143 | Cameroon | 26 | Palestinian Ter. | 111.85 | Bolivia | 10.79 | Albania | 97.89 | Ethiopia | 110.17 | Tanzania | 121.29 |
| 144 | Nigeria | 26 | Azerbaijan | 111.93 | Bhutan | 10.65 | N. Macedonia | 97.83 | India | 110.86 | Cote d'Ivoire | 122.14 |
| 145 | Uganda | 26 | Malawi | 112 | Sudan | 10.33 | Sierra Leone | 97.70 | Gabon | 110.97 | Guyana | 122.43 |
| 146 | Kyrgyzstan | 25 | Rep. of Congo | 112.38 | St Lucia | 10.12 | Ecuador | 97.17 | St Kitts & Nevis | 111.22 | Jordan | 123.43 |
| 147 | Guatemala | 25 | Nigeria | 112.53 | Iceland | 9.47 | Nicaragua | 97.11 | Azerbaijan | 111.93 | Azerbaijan | 123.86 |
| 148 | Mozambique | 25 | Marshall Islands | 112.6 | Lebanon | 9.33 | Rep. of Congo | 96.79 | Cape Verde | 112.00 | Uzbekistan | 124.57 |
| 149 | Paraguay | 24 | Micronesia | 112.65 | Somalia | 9.29 | St Lucia | 95.63 | Guinea-Bissau | 112.60 | Kenya | 124.71 |
| 150 | C. African Rep. | 24 | Cape Verde | 113.37 | Guyana | 9.01 | Bhutan | 94.89 | New Caledonia | 112.69 | El Salvador | 126.29 |
| 151 | Bangladesh | 23 | Algeria | 114.11 | Cameroon | 8.05 | Egypt | 93.21 | Sri Lanka | 112.97 | Venezuela | 126.43 |
| 152 | Iran | 23 | Bahamas | 114.41 | Suriname | 7.93 | Tanzania | 91.90 | Guatemala | 113.37 | Cambodia | 127.57 |
| 153 | Rep. of Congo | 23 | Guinea | 114.44 | Fiji | 7.91 | Canada | 91.23 | Bahamas | 114.12 | Tunisia | 127.71 |
| 154 | Russia | 22 | Oman | 114.45 | St Kitts & Nevis | 7.53 | Dominican Rep. | 90.39 | Cuba | 114.34 | Morocco | 127.86 |
| 155 | Lebanon | 22 | Laos | 114.52 | Bahamas | 7.42 | New Caledonia | 90.34 | S. Tome & Prin | 114.44 | Mozambique | 127.86 |
| 156 | Azerbaijan | 22 | Gambia | 114.65 | Burundi | 7.09 | Curacao | 88.27 | Togo | 114.45 | Dominica | 128.80 |
| 157 | Honduras | 22 | Zimbabwe | 115.04 | Syria | 6.84 | Zimbabwe | 87.62 | Malawi | 114.52 | Honduras | 129.00 |
| 158 | Comoros | 21 | Egypt | 115.37 | Myanmar | 6.79 | S. Tome & Prin | 86.78 | Papua N. G. | 114.66 | Angola | 129.29 |
| 159 | Guinea-Bissau | 21 | Madagascar | 116.13 | Armenia | 6.40 | Dominica | 85.86 | Grenada | 115.04 | Nigeria | 129.43 |
| 160 | Cambodia | 21 | Uganda | 116.57 | Laos | 6.20 | Cameroon | 82.78 | Channel Islands | 116.31 | Sierra Leone | 129.71 |
| 161 | Chad | 21 | Lesotho | 116.96 | Am. Samoa | . | Pakistan | 81.75 | El Salvador | 116.57 | Botswana | 130.57 |
| 162 | Zimbabwe | 21 | Djibouti | 117 | Andorra | . | Grenada | 81.07 | Palau | 116.57 | Kiribati | 130.67 |
| 163 | Congo (DRC) | 20 | Niger | 117.17 | Aruba | . | India | 80.65 | Aruba | 116.71 | Guinea-Bissau | 130.71 |
| 164 | Tajikistan | 19 | Burkina Faso | 117.2 | Bermuda | . | Tuvalu | 80.33 | Belize | 116.96 | Ethiopia | 131.00 |
| 165 | Turkmenistan | 17 | Angola | 117.3 | Br. Virgin Is. | . | Virgin Is. (US) | 79.93 | Bermuda | 117.05 | Iran | 131.00 |
| 166 | Afghanistan | 17 | Mozambique | 117.62 | C. African Rep. | . | Nauru | 79.92 | Comoros | 117.08 | Nicaragua | 131.14 |
| 167 | Burundi | 17 | Eq. Guinea | 117.68 | Cape Verde | . | Rwanda | 79.86 | Gambia | 117.17 | Madagascar | 131.71 |
| 168 | Haiti | 16 | Turkmenistan | 117.69 | Cayman Islands | . | Syria | 79.68 | Mozambique | 117.20 | Egypt | 132.43 |
| 169 | Myanmar | 16 | Bahrain | 117.79 | Channel Islands | . | Vanuatu | 78.20 | Mauritania | 117.30 | Haiti | 133.29 |
| 170 | North Korea | 15 | Iran | 119.79 | Comoros | . | Palestinian Ter. | 77.60 | Angola | 117.62 | South Africa | 133.71 |
| 171 | Sudan | 15 | C. African Rep. | 120 | Curacao | . | Lebanon | 76.68 | Guinea | 117.68 | Nepal | 134.00 |
| 172 | Nicaragua | 14 | Guinea-Bissau | 120.33 | Djibouti | . | Honduras | 76.08 | Nepal | 117.69 | Guinea | 134.29 |
| 173 | Libya | 13 | Papua N. G. | 120.35 | Dominica | . | Togo | 74.18 | Burkina Faso | 117.79 | Uganda | 134.43 |
| 174 | Eq. Guinea | 13 | Kuwait | 120.4 | Eq. Guinea | . | Sudan | 73.97 | Br. Virgin Is. | 118.65 | Micronesia | 134.67 |
| 175 | Yemen | 13 | Comoros | 120.4 | Eritrea | . | Madagascar | 70.18 | Dominica | 119.79 | Niger | 134.71 |
| 176 | Eritrea | 13 | Tajikistan | 120.54 | Faroe Islands | . | Uganda | 69.99 | Nigeria | 120.00 | St Vin. & Gren, | 135.00 |
| 177 | Syria | 12 | Burundi | 120.79 | Fr. Polynesia | . | Chad | 68.20 | Virgin Is. (US) | 120.00 | Laos | 136.14 |
| 178 | Venezuela | 10 | Haiti | 121.04 | Gibraltar | . | Cuba | 67.78 | Eswatini | 120.33 | Benin | 136.86 |
| 179 | Somalia | 9 | Pakistan | 121.28 | Greenland | . | Jordan | 67.57 | Iraq | 120.33 | Lesotho | 136.86 |
| 180 | South Sudan | 8 | Lebanon | 121.29 | Grenada | . | Lesotho | 67.52 | Niger | 120.72 | Am. Samoa | 137.33 |
| 181 | Am. Samoa | . | Eswatini | 121.47 | Guam | . | Angola | 67.37 | Micronesia | 121.04 | Cape Verde | 137.57 |
| 182 | Andorra | . | Mali | 121.87 | Guinea | . | Solomon Islands | 66.96 | Somalia | 121.28 | Turkmenistan | 137.71 |
| 183 | Curacao | . | Chad | 121.93 | Haiti | . | Belize | 65.99 | Cameroon | 121.34 | Belize | 138.00 |
| 184 | Faroe Islands | . | Yemen | 122.28 | Isle of Man | . | Laos | 64.96 | Madagascar | 121.50 | Zambia | 138.00 |
| 185 | Fr. Polynesia | . | Syria | 122.63 | Kiribati | . | Haiti | 63.93 | Nicaragua | 121.87 | Palestinian Ter. | 138.33 |
| 186 | Greenland | . | Iraq | 122.72 | Kosovo | . | Venezuela | 63.42 | Rwanda | 121.93 | Gambia | 138.57 |
| 187 | Liechtenstein | . | Sudan | 123 | Liberia | . | Tonga | 60.68 | Lebanon | 122.67 | Eq. Guinea | 139.57 |
| 188 | Macau | . | Mauritania | 123.38 | Libya | . | Samoa | 60.40 | Cambodia | 122.72 | Mali | 139.57 |
| 189 | Marshall Islands | . | Afghanistan | 124.14 | Liechtenstein | . | Malawi | 60.13 | Congo (DRC) | 122.97 | North Korea | 139.67 |
| 190 | Micronesia | . | South Sudan | 124.2 | Macau | . | Burundi | 57.96 | Greenland | 123.12 | Cameroon | 139.86 |
| 191 | Monaco | . | Libya | 124.62 | Maldives | . | Afghanistan | 56.55 | Uganda | 123.38 | S. Tome & Prin | 140.83 |
| 192 | New Caledonia | . | Eritrea | 124.93 | Marshall Islands | . | Niger | 56.39 | Zimbabwe | 124.14 | Pakistan | 141.14 |
| 193 | Palau | . | Somalia | 125.03 | Micronesia | . | Ethiopia | 56.02 | Mali | 124.20 | Burundi | 141.71 |
| 194 | S. Maarten (D) | . | Am. Samoa | 125.41 | Monaco | . | Eq. Guinea | 53.34 | Honduras | 124.93 | Gabon | 142.43 |
| 195 | Samoa | . | Aruba | 126 | N. Mariana Is. | . | Congo (DRC) | 50.34 | Rep. of Congo | 125.04 | Rep. of Congo | 142.86 |
| 196 | St Martin (Fr) | . | Bermuda | 126.11 | Nauru | . | Somalia | 50.26 | Syria | 125.39 | Chad | 144.00 |
| 197 | Tuvalu | . | Br. Virgin Is. | 126.11 | New Caledonia | . | Eritrea | 49.75 | Lesotho | 125.41 | Iraq | 144.29 |
| 198 | Am. Samoa | . | Cayman Islands | 126.38 | North Korea | . | Kiribati | 48.83 | Venezuela | 126.11 | Myanmar | 144.29 |
| 199 | Andorra | . | Channel Islands | 126.89 | Palau | . | Papua N. G. | 48.42 | St Lucia | 126.12 | Eswatini | 145.71 |
| 200 | Curacao | . | Curacao | 127.93 | Puerto Rico | . | Djibouti | 46.33 | Puerto Rico | 126.16 | Mauritania | 145.86 |
| 201 | Faroe Islands | . | Faroe Islands | 128.41 | Rep. of Congo | . | Yemen | 46.02 | Chad | 126.38 | Burkina Faso | 146.14 |
| 202 | Fr. Polynesia | . | Fr. Polynesia | 129.32 | S. Maarten (D) | . | Mozambique | 42.07 | Laos | 127.93 | South Sudan | 146.57 |
| 203 | Greenland | . | Gibraltar | 130.15 | S. Tome & Prin | . | Marshall Islands | 38.05 | Eq. Guinea | 129.32 | Djibouti | 147.43 |
| 204 | Liechtenstein | . | Guam | 130.65 | Samoa | . | C. African Rep. | 33.55 | Burundi | 130.66 | Congo (DRC) | 148.29 |
| 205 | Macau | . | Hong Kong | 130.79 | San Marino | . | Liberia | 31.83 | Afghanistan | 130.71 | Namibia | 149.00 |
| 206 | Marshall Islands | . | Isle of Man | 132.83 | Solomon Islands | . | South Sudan | 30.02 | Yemen | 132.61 | Zimbabwe | 150.43 |
| 207 | Micronesia | . | Monaco | 134.1 | South Sudan | . | North Korea | 23.10 | Pakistan | 132.83 | Nauru | 150.50 |
| 208 | Monaco | . | N. Mariana Is. | 134.72 | St Martin (Fr) | . | Micronesia | 19.45 | Am. Samoa | 134.07 | Libya | 151.14 |
| 209 | New Caledonia | . | Nauru | 135.52 | Tajikistan | . | Guam | 16.98 | Djibouti | 134.10 | Sudan | 151.86 |
| 210 | Palau | . | New Caledonia | 136.94 | Timor Leste | . | N. Mariana Is. | 3.73 | Sudan | 134.72 | Syria | 155.57 |
| 211 | S. Maarten (D) | . | North Korea | 137.96 | Tonga | . | Am. Samoa | 3.42 | South Sudan | 136.38 | Yemen | 157.71 |
| 212 | Samoa | . | Puerto Rico | 139.11 | Turkmenistan | . | Turks & Caicos | 0.00 | North Korea | 136.61 | Afghanistan | 160.00 |
| 213 | St Martin (Fr) | . | S. Maarten (D) | 139.37 | Turks & Caicos | . |  |  | Haiti | 137.96 | Tajikistan | 160.57 |
| 214 | Tuvalu | . | San Marino | 141.17 | Tuvalu | . |  |  | Myanmar | 141.17 | C. African Rep. | 160.71 |
| 215 | Am. Samoa | . | St Martin (Fr) | 146.08 | Vanuatu | . |  |  | Curacao | 142.67 | Somalia | 162.50 |
| 216 | Andorra | . | Turks & Caicos | 146.55 | Venezuela | . |  |  | C. African Rep. | 146.56 | Rwanda | 167.71 |
| 217 | Curacao | . | Virgin Is. (US) | 148.73 | Virgin Is. (US) | . |  |  | Eritrea | 148.85 | Eritrea | 171.33 |

## Supplementary Table 7. Summary of average and variability in country rankings across subjective and objective variables (countries ordered alphabetically)

|  | Subjective | | | | Objective | | | |
| --- | --- | --- | --- | --- | --- | --- | --- | --- |
| Average Rank | Rank of average rank | SD of Rank | Rank of SD of rank | Average Rank | Rank of average rank | SD of Rank | Rank of SD of rank |
| Argentina | 12.17 | 12 | 5.55 | 7 | 12.13 | 11 | 5.59 | 15 |
| Australia | 13.53 | 18 | 5.96 | 11 | 5.38 | 2 | 5.32 | 13 |
| Brazil | 12.69 | 13 | 5.80 | 10 | 15 | 17 | 3.46 | 2 |
| China | 13.37 | 17 | 7.16 | 22 | 14.88 | 16 | 4.19 | 8 |
| Egypt | 10.69 | 7 | 7.10 | 21 | 18.13 | 22 | 4.22 | 9 |
| Germany | 14.13 | 20 | 5.68 | 9 | 5.75 | 4 | 2.96 | 1 |
| Hong Kong | 13.26 | 16 | 5.55 | 8 | 8.75 | 7 | 5.2 | 12 |
| India | 11.78 | 10 | 6.64 | 17 | 15.25 | 18 | 6.5 | 20 |
| Indonesia | 5.72 | 1 | 5.97 | 12 | 14.75 | 14 | 4.77 | 10 |
| Israel | 7.85 | 2 | 4.83 | 4 | 10.25 | 10 | 4.83 | 11 |
| Japan | 18.44 | 23 | 6.42 | 14 | 4.63 | 1 | 4.1 | 5 |
| Kenya | 10.09 | 6 | 6.53 | 15 | 17 | 20 | 5.55 | 14 |
| Mexico | 8.77 | 3 | 5.13 | 5 | 13.63 | 13 | 4.03 | 4 |
| Nigeria | 8.88 | 4 | 6.56 | 16 | 17.5 | 21 | 8.16 | 23 |
| Philippines | 9.72 | 5 | 7.03 | 20 | 13.5 | 12 | 6.12 | 17 |
| Poland | 10.79 | 9 | 6.66 | 18 | 9.5 | 9 | 4.11 | 7 |
| South Africa | 11.78 | 11 | 5.43 | 6 | 18.25 | 23 | 4.1 | 6 |
| Spain | 13.95 | 19 | 3.75 | 1 | 8.63 | 6 | 5.83 | 16 |
| Sweden | 12.92 | 15 | 7.44 | 23 | 5.63 | 3 | 6.46 | 19 |
| Tanzania | 10.74 | 8 | 6.94 | 19 | 15.88 | 19 | 7.7 | 22 |
| Turkey | 16.22 | 22 | 6.01 | 13 | 14.75 | 15 | 6.32 | 18 |
| UK | 15.72 | 21 | 4.80 | 3 | 7.5 | 5 | 3.55 | 3 |
| US | 12.81 | 14 | 4.73 | 2 | 9.38 | 8 | 6.61 | 21 |
